# Supplementary material
Source: publisher figshare collection journal article supplement (https://acs.figshare.com/ndownloader/files/3870526)
Supplement: Supplementary file 1 [file 3870526]

data_Ni(CH3)3P_C60_polymer_280K
_publ_contact_author_name        'Konarev, Dmitri V.'
_publ_contact_author_address
;
Institute of Problems of Chemical Physics, RAS,
Chernogolovka, 142432, Russia
;
_publ_contact_author_email       'konarev3@yandex.ru'

loop_
_publ_author_name
_publ_author_address
'Konarev, Dmitri V.'
;
Institute of Problems of Chemical Physics, RAS,
Chernogolovka, 142432, Russia
e-mail: konarev3@yandex.ru
;
'Khasanov Salavat S.'
;
Institute of Solid State Physics, RAS,
Chernogolovka, 142432, Russia
e-mail: khasanov@issp.ac.ru
;
'Yoshiaki Nakano'
;
Research Center for Low Temperature and 
Materials Sciences, Kyoto University
;
'Akihiro Otsuka'
;
Research Center for Low Temperature and 
Materials Sciences, Kyoto University
;
'Hideki Yamochi'
;
Research Center for Low Temperature and 
Materials Sciences, Kyoto University
;
'Gunzi Saito'
;
Research Institute, Meijo University, 1-501 
Shiogamaguchi, Tempaku-ku, Nagoya 468-8502, 
Japan
;
'Lyubovskaya N. Rimma '
;
Institute of Problems of Chemical Physics, RAS,
Chernogolovka, 142432, Russia
;
_publ_requested_category FA
_publ_requested_journal
;
'J. Am. Chem. Soc.'
;
_publ_section_title
;
Linear coordination fullerene C60 polymer 
[{Ni(Me3P)2}(gapta2-eta2,eta2-C60)]n bridged 
by zero-valent nickel atoms 
;
_publ_section_abstract
; 
Coordination polymer [{Ni(Me3P)2}(gapta2-eta2,eta2-C60)]n 
containing neutral fullerenes and zero-valent nickel atoms 
as bridges is obtained. Each of nickel atoms is coordinated 
to two fullerene cages by the gapta2-type providing close 
approach of fullerenes to each other in the polymer with 
9.693 A interfullerene center-to-center distance 
;        
 
_audit_creation_method            SHELXL-2013
_chemical_name_systematic
;
 ?
;
_chemical_name_common             ?
_chemical_melting_point           ?
_chemical_formula_moiety          
 'C66 H18 P2 Ni1'
_chemical_formula_structural
 'C60 Ni(P(CH3)3)2'
_chemical_formula_sum
 'C66 H18 Ni P2' 
_chemical_formula_weight          931.45

loop_
 _atom_type_symbol
 _atom_type_description
 _atom_type_scat_dispersion_real
 _atom_type_scat_dispersion_imag
 _atom_type_scat_source
 'C'  'C'   0.0033   0.0016
 'International Tables Vol C Tables 4.2.6.8 and 6.1.1.4'
 'H'  'H'   0.0000   0.0000
 'International Tables Vol C Tables 4.2.6.8 and 6.1.1.4'
 'P'  'P'   0.1023   0.0942
 'International Tables Vol C Tables 4.2.6.8 and 6.1.1.4'
 'Ni'  'Ni'   0.3393   1.1124
 'International Tables Vol C Tables 4.2.6.8 and 6.1.1.4'
 
_space_group_crystal_system       orthorhombic
_space_group_IT_number            60
_space_group_name_H-M_alt         'P b n a'
_space_group_name_Hall            '-p_2ac_2b'
 
_shelx_space_group_comment
;
The symmetry employed for this shelxl refinement is uniquely defined
by the following loop, which should always be used as a source of
symmetry information in preference to the above space-group names.
They are only intended as comments.
;
 
loop_
 _space_group_symop_operation_xyz
 'x, y, z'
 '-x+1/2, -y, z+1/2'
 'x, -y+1/2, -z'
 '-x+1/2, y+1/2, -z+1/2'
 '-x, -y, -z'
 'x-1/2, y, -z-1/2'
 '-x, y-1/2, z'
 'x-1/2, -y-1/2, z-1/2'
 
_cell_length_a                    11.0872(19)
_cell_length_b                    19.385(3)
_cell_length_c                    16.484(3)
_cell_angle_alpha                 90
_cell_angle_beta                  90
_cell_angle_gamma                 90
_cell_volume                      3542.9(10)
_cell_formula_units_Z             4
_cell_measurement_temperature     280(2)
_cell_measurement_reflns_used     3654 
_cell_measurement_theta_min       3 
_cell_measurement_theta_max       25.5 
 
_exptl_crystal_description        plate 
_exptl_crystal_colour             black 
_exptl_crystal_density_meas       ? 
_exptl_crystal_density_method     ?              
_exptl_crystal_density_diffrn     1.746          
_exptl_crystal_F_000              1888
_exptl_transmission_factor_min    0.75
_exptl_transmission_factor_max    0.86 
_exptl_crystal_size_max           0.400
_exptl_crystal_size_mid           0.120
_exptl_crystal_size_min           0.040
_exptl_absorpt_coefficient_mu     0.696
_shelx_estimated_absorpt_T_min    0.768
_shelx_estimated_absorpt_T_max    0.973
_exptl_absorpt_correction_type    multi-scan 
_exptl_absorpt_correction_T_min   0.87 
_exptl_absorpt_correction_T_max   1.00 
_exptl_absorpt_process_details     
;
SADABS-2012/1 - Bruker AXS area detector scaling and absorption correction
; 
_exptl_special_details
;
 ?
;
 
_diffrn_ambient_temperature       280(2)
_diffrn_radiation_wavelength      0.71073
_diffrn_radiation_type            MoK\a
_diffrn_radiation_source         'sealed tube'
_diffrn_radiation_monochromator  'graphite'
_diffrn_measurement_device_type  'Bruker APEX-II CCD'
_diffrn_measurement_method       '\f and \w scans'
_diffrn_reflns_number             33186
_diffrn_reflns_av_unetI/netI      0.0670
_diffrn_reflns_av_R_equivalents   0.0898
_diffrn_reflns_limit_h_min        -15
_diffrn_reflns_limit_h_max        15
_diffrn_reflns_limit_k_min        -26
_diffrn_reflns_limit_k_max        26
_diffrn_reflns_limit_l_min        -22
_diffrn_reflns_limit_l_max        21
_diffrn_reflns_theta_min          2.101
_diffrn_reflns_theta_max          29.335
_diffrn_reflns_theta_full         25.242
_diffrn_measured_fraction_theta_max   0.963
_diffrn_measured_fraction_theta_full  1.000
_diffrn_reflns_Laue_measured_fraction_max    0.963
_diffrn_reflns_Laue_measured_fraction_full   1.000
_diffrn_reflns_point_group_measured_fraction_max   0.963
_diffrn_reflns_point_group_measured_fraction_full  1.000
_reflns_number_total              4684
_reflns_number_gt                 2463
_reflns_threshold_expression      'I > 2\s(I)'
_reflns_Friedel_coverage          0.000
_reflns_Friedel_fraction_max      .
_reflns_Friedel_fraction_full     .
 
_reflns_special_details
;
 Reflections were merged by SHELXL according to the crystal
 class for the calculation of statistics and refinement.
 
 _reflns_Friedel_fraction is defined as the number of unique
 Friedel pairs measured divided by the number that would be
 possible theoretically, ignoring centric projections and
 systematic absences.
;
 
_computing_data_collection        'Bruker APEX2'
_computing_cell_refinement        'Bruker SAINT'
_computing_data_reduction         'Bruker SAINT'
_computing_structure_solution     'SHELXS-2013 (Sheldrick, 2013)'
_computing_structure_refinement   'SHELXL-2013 (Sheldrick, 2013)'
_computing_molecular_graphics     'WinGX'
_computing_publication_material   'WinGX'
 
_refine_special_details
;
 Due to large number of weak reflections and large number refined parameters
 we used DELU, ISOR and SAME instructions to keep the parameters of fullerene 
 cages reasonable. The weak reflections are in fact "superstructure" 
 reflections breaking C-centering of the lattice to P lattice but they are 
 very weak.
;
_refine_ls_structure_factor_coef  Fsqd
_refine_ls_matrix_type            full
_refine_ls_weighting_scheme       calc
_refine_ls_weighting_details
'w=1/[\s^2^(Fo^2^)+(0.1132P)^2^+9.6541P] where P=(Fo^2^+2Fc^2^)/3'
_atom_sites_solution_primary      direct
_atom_sites_solution_secondary    difmap
_atom_sites_solution_hydrogens    geom
_refine_ls_hydrogen_treatment     constr
_refine_ls_extinction_method      none
_refine_ls_extinction_coef        .
_refine_ls_number_reflns          4684
_refine_ls_number_parameters      585
_refine_ls_number_restraints      716
_refine_ls_R_factor_all           0.1527
_refine_ls_R_factor_gt            0.0774
_refine_ls_wR_factor_ref          0.2547
_refine_ls_wR_factor_gt           0.1996
_refine_ls_goodness_of_fit_ref    1.040
_refine_ls_restrained_S_all       1.125
_refine_ls_shift/su_max           0.001
_refine_ls_shift/su_mean          0.000
 
loop_
 _atom_site_label
 _atom_site_type_symbol
 _atom_site_fract_x
 _atom_site_fract_y
 _atom_site_fract_z
 _atom_site_U_iso_or_equiv
 _atom_site_adp_type
 _atom_site_occupancy
 _atom_site_site_symmetry_order  
 _atom_site_calc_flag
 _atom_site_refinement_flags_posn
 _atom_site_refinement_flags_adp
 _atom_site_refinement_flags_occupancy
 _atom_site_disorder_assembly
 _atom_site_disorder_group
Ni Ni 0.75577(7) 0.7500 0.0000 0.0184(3) Uani 1 2 d S TU P . .
P P 0.88744(11) 0.74583(6) -0.10664(8) 0.0253(3) Uani 1 1 d . U . . .
C1 C 0.8192(6) 0.7513(3) -0.2070(3) 0.0406(12) Uani 1 1 d . U . . .
H1A H 0.7585 0.7163 -0.2123 0.061 Uiso 1 1 calc R U . . .
H1B H 0.8801 0.7447 -0.2476 0.061 Uiso 1 1 calc R U . . .
H1C H 0.7829 0.7959 -0.2138 0.061 Uiso 1 1 calc R U . . .
C2 C 0.9968(6) 0.8162(3) -0.1113(5) 0.0519(17) Uani 1 1 d . U . . .
H2A H 1.0397 0.8190 -0.0608 0.078 Uiso 1 1 calc R U . . .
H2B H 0.9554 0.8589 -0.1210 0.078 Uiso 1 1 calc R U . . .
H2C H 1.0528 0.8078 -0.1546 0.078 Uiso 1 1 calc R U . . .
C3 C 0.9910(6) 0.6731(3) -0.1190(4) 0.0447(15) Uani 1 1 d . U . . .
H3A H 1.0332 0.6651 -0.0690 0.067 Uiso 1 1 calc R U . . .
H3B H 1.0481 0.6834 -0.1611 0.067 Uiso 1 1 calc R U . . .
H3C H 0.9462 0.6325 -0.1334 0.067 Uiso 1 1 calc R U . . .
C101 C 0.6321(8) 0.6715(5) -0.0360(6) 0.0223(11) Uani 0.607(5) 1 d D U P A 1
C102 C 0.6945(8) 0.6516(5) 0.0379(6) 0.0221(12) Uani 0.607(5) 1 d D U P A 1
C103 C 0.6211(8) 0.6411(4) 0.1115(5) 0.0263(13) Uani 0.607(5) 1 d D U P A 1
C104 C 0.4977(8) 0.6555(4) 0.1127(5) 0.0329(14) Uani 0.607(5) 1 d D U P A 1
C105 C 0.4360(7) 0.6744(4) 0.0381(6) 0.0306(14) Uani 0.607(5) 1 d D U P A 1
C106 C 0.5006(7) 0.6796(4) -0.0316(5) 0.0275(12) Uani 0.607(5) 1 d D U P A 1
C107 C 0.6517(8) 0.6308(4) -0.1095(5) 0.0269(13) Uani 0.607(5) 1 d D U P A 1
C108 C 0.7369(8) 0.5776(4) -0.1108(5) 0.0301(14) Uani 0.607(5) 1 d D U P A 1
C109 C 0.7970(7) 0.5566(4) -0.0372(6) 0.0288(14) Uani 0.607(5) 1 d D U P A 1
C110 C 0.7738(7) 0.5905(4) 0.0352(5) 0.0255(14) Uani 0.607(5) 1 d D U P A 1
C111 C 0.7590(7) 0.5512(4) 0.1091(5) 0.0317(15) Uani 0.607(5) 1 d D U P A 1
C112 C 0.6632(8) 0.5825(4) 0.1561(5) 0.0293(15) Uani 0.607(5) 1 d D U P A 1
C113 C 0.4490(8) 0.6540(4) -0.1066(6) 0.0348(14) Uani 0.607(5) 1 d D U P A 1
C114 C 0.5450(8) 0.6227(4) -0.1549(5) 0.0329(15) Uani 0.607(5) 1 d D U P A 1
C115 C 0.5187(9) 0.5643(4) -0.1995(5) 0.0428(17) Uani 0.607(5) 1 d D U P A 1
C116 C 0.6162(10) 0.5081(5) -0.2007(6) 0.046(2) Uani 0.607(5) 1 d D U P A 1
C117 C 0.7132(9) 0.5154(4) -0.1565(6) 0.0412(17) Uani 0.607(5) 1 d D U P A 1
C118 C 0.7603(9) 0.4572(5) -0.1127(6) 0.0459(18) Uani 0.607(5) 1 d D U P A 1
C119 C 0.8104(7) 0.4820(4) -0.0383(6) 0.0391(16) Uani 0.607(5) 1 d D U P A 1
C120 C 0.8007(8) 0.4448(4) 0.0280(7) 0.0422(18) Uani 0.607(5) 1 d D U P A 1
C121 C 0.7696(10) 0.4788(4) 0.1094(6) 0.0410(19) Uani 0.607(5) 1 d D U P A 1
C122 C 0.5856(9) 0.5396(5) 0.2015(5) 0.0409(18) Uani 0.607(5) 1 d D U P A 1
C123 C 0.4539(9) 0.5601(5) 0.2012(6) 0.0438(18) Uani 0.607(5) 1 d D U P A 1
C124 C 0.4180(9) 0.6105(5) 0.1596(5) 0.0419(17) Uani 0.607(5) 1 d D U P A 1
C125 C 0.3052(8) 0.6059(5) 0.1139(6) 0.0450(17) Uani 0.607(5) 1 d D U P A 1
C126 C 0.3177(7) 0.6445(4) 0.0389(6) 0.0430(16) Uani 0.607(5) 1 d D U P A 1
C127 C 0.2662(8) 0.6211(5) -0.0271(7) 0.0440(17) Uani 0.607(5) 1 d D U P A 1
C128 C 0.3333(8) 0.6247(4) -0.1071(6) 0.0426(17) Uani 0.607(5) 1 d D U P A 1
C129 C 0.3054(9) 0.5657(5) -0.1510(7) 0.0471(18) Uani 0.607(5) 1 d D U P A 1
C130 C 0.4074(12) 0.5322(6) -0.2013(7) 0.044(2) Uani 0.607(5) 1 d D U P A 1
C201 C 0.6755(9) 0.6576(5) 0.0401(7) 0.0203(16) Uani 0.393(5) 1 d D U P A 2
C202 C 0.6483(9) 0.6664(6) -0.0455(7) 0.0217(14) Uani 0.393(5) 1 d D U P A 2
C203 C 0.6972(8) 0.6149(4) -0.1026(5) 0.0239(19) Uani 0.393(5) 1 d D U P A 2
C204 C 0.7762(8) 0.5632(4) -0.0771(6) 0.028(2) Uani 0.393(5) 1 d D U P A 2
C205 C 0.8025(7) 0.5548(5) 0.0088(6) 0.028(2) Uani 0.393(5) 1 d D U P A 2
C206 C 0.7508(7) 0.5984(4) 0.0631(5) 0.0217(19) Uani 0.393(5) 1 d D U P A 2
C207 C 0.5760(9) 0.6562(4) 0.0982(5) 0.0253(18) Uani 0.393(5) 1 d D U P A 2
C208 C 0.4578(8) 0.6695(4) 0.0732(6) 0.029(2) Uani 0.393(5) 1 d D U P A 2
C209 C 0.4299(8) 0.6769(4) -0.0118(6) 0.0314(19) Uani 0.393(5) 1 d D U P A 2
C210 C 0.5206(8) 0.6733(4) -0.0695(5) 0.0234(17) Uani 0.393(5) 1 d D U P A 2
C211 C 0.5006(9) 0.6354(5) -0.1438(5) 0.025(2) Uani 0.393(5) 1 d D U P A 2
C212 C 0.6100(9) 0.5981(5) -0.1633(5) 0.031(2) Uani 0.393(5) 1 d D U P A 2
C213 C 0.7060(9) 0.5711(5) 0.1392(5) 0.027(2) Uani 0.393(5) 1 d D U P A 2
C214 C 0.5950(9) 0.6075(5) 0.1603(5) 0.0303(19) Uani 0.393(5) 1 d D U P A 2
C215 C 0.5030(9) 0.5705(5) 0.1963(6) 0.037(2) Uani 0.393(5) 1 d D U P A 2
C216 C 0.3746(10) 0.5879(6) 0.1682(7) 0.039(2) Uani 0.393(5) 1 d D U P A 2
C217 C 0.3584(9) 0.6322(5) 0.1093(6) 0.039(2) Uani 0.393(5) 1 d D U P A 2
C218 C 0.2697(9) 0.6182(7) 0.0479(7) 0.041(2) Uani 0.393(5) 1 d D U P A 2
C219 C 0.3136(8) 0.6450(5) -0.0272(7) 0.040(2) Uani 0.393(5) 1 d D U P A 2
C220 C 0.2906(9) 0.6122(7) -0.0953(7) 0.040(3) Uani 0.393(5) 1 d D U P A 2
C221 C 0.3888(9) 0.6037(6) -0.1601(6) 0.038(2) Uani 0.393(5) 1 d D U P A 2
C222 C 0.6003(12) 0.5317(6) -0.1980(7) 0.035(3) Uani 0.393(5) 1 d D U P A 2
C223 C 0.6910(12) 0.4792(5) -0.1679(7) 0.041(3) Uani 0.393(5) 1 d D U P A 2
C224 C 0.7660(9) 0.4947(5) -0.1136(6) 0.036(2) Uani 0.393(5) 1 d D U P A 2
C225 C 0.7947(12) 0.4453(5) -0.0494(7) 0.039(2) Uani 0.393(5) 1 d D U P A 2
C226 C 0.8151(9) 0.4825(5) 0.0257(7) 0.037(2) Uani 0.393(5) 1 d D U P A 2
C227 C 0.7786(13) 0.4554(5) 0.0942(7) 0.039(3) Uani 0.393(5) 1 d D U P A 2
C228 C 0.7173(9) 0.5006(5) 0.1568(6) 0.034(2) Uani 0.393(5) 1 d D U P A 2
C229 C 0.6252(12) 0.4623(6) 0.1919(10) 0.034(3) Uani 0.393(5) 1 d D U P A 2
C230 C 0.5073(13) 0.5007(6) 0.2135(8) 0.046(3) Uani 0.393(5) 1 d D U P A 2
 
loop_
 _atom_site_aniso_label
 _atom_site_aniso_U_11
 _atom_site_aniso_U_22
 _atom_site_aniso_U_33
 _atom_site_aniso_U_23
 _atom_site_aniso_U_13
 _atom_site_aniso_U_12
Ni 0.0199(4) 0.0117(4) 0.0237(4) 0.0004(3) 0.000 0.000
P 0.0246(6) 0.0195(6) 0.0317(7) -0.0006(5) 0.0069(5) 0.0002(5)
C1 0.055(3) 0.040(3) 0.0264(18) 0.003(2) 0.0078(18) 0.001(3)
C2 0.043(4) 0.043(3) 0.070(4) -0.011(3) 0.023(3) -0.021(2)
C3 0.035(3) 0.039(2) 0.060(4) 0.003(3) 0.020(3) 0.013(2)
C101 0.028(2) 0.010(3) 0.029(2) 0.0034(18) -0.0021(18) -0.0050(17)
C102 0.026(3) 0.015(2) 0.026(2) 0.000(2) -0.0014(17) -0.0065(19)
C103 0.037(2) 0.019(3) 0.023(3) -0.006(2) 0.000(2) -0.011(2)
C104 0.039(2) 0.022(3) 0.038(3) -0.018(2) 0.011(2) -0.005(2)
C105 0.030(3) 0.006(3) 0.056(3) -0.009(3) 0.0054(19) 0.004(2)
C106 0.029(2) 0.008(3) 0.046(2) 0.005(2) -0.0049(19) 0.001(2)
C107 0.033(3) 0.023(3) 0.024(3) 0.002(2) 0.003(2) -0.014(2)
C108 0.030(3) 0.028(2) 0.032(3) -0.003(2) 0.017(2) -0.013(2)
C109 0.022(4) 0.019(2) 0.046(3) -0.001(2) 0.011(2) -0.007(2)
C110 0.022(3) 0.018(2) 0.036(2) 0.0026(18) -0.004(2) -0.006(2)
C111 0.032(3) 0.025(2) 0.038(3) 0.008(2) -0.016(3) -0.009(2)
C112 0.042(3) 0.025(3) 0.021(3) 0.000(2) -0.011(2) -0.019(2)
C113 0.037(2) 0.021(3) 0.046(3) 0.017(2) -0.018(2) -0.004(2)
C114 0.046(3) 0.026(3) 0.026(3) 0.013(2) -0.009(2) -0.018(3)
C115 0.062(3) 0.040(3) 0.026(4) 0.006(2) -0.007(3) -0.028(2)
C116 0.064(4) 0.045(4) 0.027(4) -0.011(3) 0.020(3) -0.023(3)
C117 0.050(3) 0.035(3) 0.039(3) -0.014(2) 0.026(3) -0.014(3)
C118 0.043(4) 0.030(3) 0.064(3) -0.016(3) 0.026(3) -0.007(3)
C119 0.022(4) 0.021(2) 0.074(3) -0.007(2) 0.011(3) 0.000(3)
C120 0.025(4) 0.019(3) 0.083(3) 0.003(2) -0.009(4) 0.000(3)
C121 0.035(4) 0.027(3) 0.062(3) 0.012(3) -0.029(4) 0.001(3)
C122 0.061(3) 0.045(4) 0.017(3) 0.006(3) -0.007(3) -0.026(3)
C123 0.060(3) 0.048(4) 0.023(4) -0.017(3) 0.017(3) -0.023(3)
C124 0.050(3) 0.037(4) 0.039(3) -0.022(2) 0.024(2) -0.012(3)
C125 0.035(3) 0.035(4) 0.065(3) -0.022(3) 0.027(3) -0.003(3)
C126 0.024(3) 0.023(4) 0.082(3) -0.007(3) 0.008(2) 0.007(3)
C127 0.025(3) 0.020(4) 0.086(3) 0.007(3) -0.008(2) 0.006(3)
C128 0.033(3) 0.027(3) 0.068(3) 0.025(3) -0.025(3) -0.002(3)
C129 0.045(3) 0.045(4) 0.051(4) 0.021(3) -0.033(3) -0.012(3)
C130 0.061(3) 0.044(4) 0.027(4) 0.016(3) -0.021(4) -0.029(3)
C201 0.024(3) 0.013(3) 0.024(3) -0.002(3) -0.001(2) -0.005(2)
C202 0.027(3) 0.014(3) 0.025(3) 0.002(2) -0.002(2) -0.004(2)
C203 0.028(4) 0.020(3) 0.024(4) 0.001(2) 0.007(3) -0.009(3)
C204 0.023(5) 0.025(3) 0.035(3) -0.006(3) 0.011(3) -0.003(3)
C205 0.018(4) 0.024(3) 0.041(3) 0.000(2) 0.000(3) 0.001(3)
C206 0.021(4) 0.017(3) 0.027(3) 0.003(2) -0.004(3) -0.007(3)
C207 0.033(3) 0.015(4) 0.029(3) -0.011(3) 0.007(2) -0.007(3)
C208 0.032(3) 0.015(5) 0.040(3) -0.010(3) 0.013(3) 0.001(3)
C209 0.031(3) 0.016(4) 0.048(3) 0.001(3) 0.002(2) 0.004(3)
C210 0.030(3) 0.011(4) 0.030(3) 0.009(3) -0.006(2) -0.003(2)
C211 0.037(3) 0.014(4) 0.024(4) 0.014(3) -0.008(3) -0.011(3)
C212 0.041(3) 0.029(3) 0.022(4) 0.000(3) 0.002(3) -0.012(3)
C213 0.031(4) 0.026(3) 0.025(4) 0.006(3) -0.009(3) -0.014(3)
C214 0.041(3) 0.032(4) 0.017(4) -0.009(3) 0.002(3) -0.014(2)
C215 0.050(3) 0.043(4) 0.020(5) -0.011(3) 0.012(3) -0.018(3)
C216 0.044(3) 0.035(5) 0.039(4) -0.014(3) 0.022(4) -0.013(4)
C217 0.036(3) 0.028(5) 0.053(4) -0.012(3) 0.019(3) -0.006(3)
C218 0.026(4) 0.029(5) 0.067(4) -0.005(4) 0.013(3) 0.004(4)
C219 0.027(3) 0.026(5) 0.067(3) 0.008(3) -0.002(3) 0.004(4)
C220 0.025(4) 0.035(5) 0.060(4) 0.019(4) -0.018(3) 0.002(4)
C221 0.040(3) 0.034(5) 0.040(4) 0.016(4) -0.020(3) -0.014(4)
C222 0.054(5) 0.033(4) 0.017(5) -0.005(3) 0.015(4) -0.014(3)
C223 0.051(5) 0.032(4) 0.040(5) -0.012(4) 0.017(4) -0.010(4)
C224 0.032(5) 0.027(3) 0.048(4) -0.011(3) 0.021(3) -0.005(4)
C225 0.027(5) 0.026(3) 0.064(4) -0.009(3) 0.011(4) 0.004(4)
C226 0.027(5) 0.023(3) 0.062(3) 0.000(3) -0.004(3) 0.001(4)
C227 0.028(5) 0.032(4) 0.057(4) 0.012(3) -0.022(4) 0.007(4)
C228 0.040(4) 0.029(3) 0.033(4) 0.012(3) -0.020(3) -0.017(3)
C229 0.043(5) 0.033(4) 0.025(5) 0.015(4) -0.026(4) -0.023(3)
C230 0.061(4) 0.050(4) 0.027(5) 0.007(4) 0.003(4) -0.019(3)
 
_geom_special_details
;
 All esds (except the esd in the dihedral angle between two l.s. planes)
 are estimated using the full covariance matrix.  The cell esds are taken
 into account individually in the estimation of esds in distances, angles
 and torsion angles; correlations between esds in cell parameters are only
 used when they are defined by crystal symmetry.  An approximate (isotropic)
 treatment of cell esds is used for estimating esds involving l.s. planes.
;
 
loop_
 _geom_bond_atom_site_label_1
 _geom_bond_atom_site_label_2
 _geom_bond_distance
 _geom_bond_site_symmetry_2
 _geom_bond_publ_flag
Ni C201 2.107(11) 3_565 ?
Ni C201 2.107(11) . ?
Ni C102 2.120(10) . ?
Ni C102 2.120(10) 3_565 ?
Ni C101 2.132(10) 3_565 ?
Ni C101 2.132(10) . ?
Ni C202 2.146(11) 3_565 ?
Ni C202 2.146(11) . ?
Ni P 2.2865(14) . ?
Ni P 2.2865(14) 3_565 ?
P C1 1.822(6) . ?
P C2 1.827(6) . ?
P C3 1.831(5) . ?
C101 C102 1.453(7) . ?
C101 C107 1.462(12) . ?
C101 C106 1.468(11) . ?
C102 C103 1.475(12) . ?
C102 C110 1.476(11) . ?
C103 C104 1.397(12) . ?
C103 C112 1.430(11) . ?
C104 C105 1.453(12) . ?
C104 C124 1.462(11) . ?
C105 C106 1.358(12) . ?
C105 C126 1.435(11) . ?
C106 C113 1.449(11) . ?
C107 C108 1.398(12) . ?
C107 C114 1.408(11) . ?
C108 C109 1.442(12) . ?
C108 C117 1.447(11) . ?
C109 C110 1.386(12) . ?
C109 C119 1.453(10) . ?
C110 C111 1.446(11) . ?
C111 C121 1.410(11) . ?
C111 C112 1.448(12) . ?
C112 C122 1.412(11) . ?
C113 C128 1.403(11) . ?
C113 C114 1.461(12) . ?
C114 C115 1.380(11) . ?
C115 C130 1.383(14) . ?
C115 C116 1.535(15) . ?
C116 C117 1.307(14) . ?
C116 C123 1.533(13) 5_665 ?
C117 C118 1.437(14) . ?
C118 C125 1.423(12) 5_665 ?
C118 C119 1.429(14) . ?
C119 C120 1.315(14) . ?
C120 C127 1.477(11) 5_665 ?
C120 C121 1.534(15) . ?
C121 C129 1.380(14) 5_665 ?
C122 C130 1.392(14) 5_665 ?
C122 C123 1.514(14) . ?
C123 C124 1.259(14) . ?
C123 C116 1.533(13) 5_665 ?
C124 C125 1.463(14) . ?
C125 C118 1.423(12) 5_665 ?
C125 C126 1.451(14) . ?
C126 C127 1.310(14) . ?
C127 C120 1.477(11) 5_665 ?
C127 C128 1.515(15) . ?
C128 C129 1.389(13) . ?
C129 C121 1.380(14) 5_665 ?
C129 C130 1.546(19) . ?
C130 C122 1.392(14) 5_665 ?
C201 C202 1.453(7) . ?
C201 C207 1.462(12) . ?
C201 C206 1.468(11) . ?
C202 C203 1.475(12) . ?
C202 C210 1.476(11) . ?
C203 C204 1.397(12) . ?
C203 C212 1.430(11) . ?
C204 C205 1.453(12) . ?
C204 C224 1.462(11) . ?
C205 C206 1.358(12) . ?
C205 C226 1.435(11) . ?
C206 C213 1.450(11) . ?
C207 C208 1.398(12) . ?
C207 C214 1.408(11) . ?
C208 C209 1.442(12) . ?
C208 C217 1.447(11) . ?
C209 C210 1.385(12) . ?
C209 C219 1.453(11) . ?
C210 C211 1.445(11) . ?
C211 C221 1.409(11) . ?
C211 C212 1.448(12) . ?
C212 C222 1.413(11) . ?
C213 C228 1.403(11) . ?
C213 C214 1.461(12) . ?
C214 C215 1.380(11) . ?
C215 C230 1.383(14) . ?
C215 C216 1.535(15) . ?
C216 C217 1.307(14) . ?
C216 C223 1.490(15) 5_665 ?
C217 C218 1.437(14) . ?
C218 C225 1.422(15) 5_665 ?
C218 C219 1.429(14) . ?
C219 C220 1.315(14) . ?
C220 C227 1.518(17) 5_665 ?
C220 C221 1.535(15) . ?
C221 C229 1.393(17) 5_665 ?
C222 C230 1.372(17) 5_665 ?
C222 C223 1.514(14) . ?
C223 C224 1.259(14) . ?
C223 C216 1.490(15) 5_665 ?
C224 C225 1.463(14) . ?
C225 C218 1.422(15) 5_665 ?
C225 C226 1.451(14) . ?
C226 C227 1.309(14) . ?
C227 C228 1.515(15) . ?
C227 C220 1.518(17) 5_665 ?
C228 C229 1.389(13) . ?
C229 C221 1.393(17) 5_665 ?
C229 C230 1.546(19) . ?
C230 C222 1.372(18) 5_665 ?
 
loop_
 _geom_angle_atom_site_label_1
 _geom_angle_atom_site_label_2
 _geom_angle_atom_site_label_3
 _geom_angle
 _geom_angle_site_symmetry_1
 _geom_angle_site_symmetry_3
 _geom_angle_publ_flag
C201 Ni C201 130.0(5) 3_565 . ?
C102 Ni C102 142.6(5) . 3_565 ?
C102 Ni C101 110.8(4) . 3_565 ?
C102 Ni C101 40.0(2) 3_565 3_565 ?
C102 Ni C101 40.0(2) . . ?
C102 Ni C101 110.8(4) 3_565 . ?
C101 Ni C101 100.0(5) 3_565 . ?
C201 Ni C202 39.9(2) 3_565 3_565 ?
C201 Ni C202 107.3(4) . 3_565 ?
C201 Ni C202 107.3(4) 3_565 . ?
C201 Ni C202 39.9(2) . . ?
C202 Ni C202 112.6(5) 3_565 . ?
C201 Ni P 93.4(3) 3_565 . ?
C201 Ni P 118.7(3) . . ?
C102 Ni P 113.5(2) . . ?
C102 Ni P 90.6(3) 3_565 . ?
C101 Ni P 130.5(3) 3_565 . ?
C101 Ni P 99.9(2) . . ?
C202 Ni P 130.5(3) 3_565 . ?
C202 Ni P 93.4(3) . . ?
C201 Ni P 118.7(3) 3_565 3_565 ?
C201 Ni P 93.4(3) . 3_565 ?
C102 Ni P 90.6(3) . 3_565 ?
C102 Ni P 113.5(2) 3_565 3_565 ?
C101 Ni P 99.9(2) 3_565 3_565 ?
C101 Ni P 130.5(3) . 3_565 ?
C202 Ni P 93.4(3) 3_565 3_565 ?
C202 Ni P 130.5(3) . 3_565 ?
P Ni P 100.64(8) . 3_565 ?
C1 P C2 101.2(3) . . ?
C1 P C3 101.8(3) . . ?
C2 P C3 98.9(3) . . ?
C1 P Ni 115.5(2) . . ?
C2 P Ni 115.5(2) . . ?
C3 P Ni 120.9(2) . . ?
C102 C101 C107 118.7(7) . . ?
C102 C101 C106 117.4(7) . . ?
C107 C101 C106 104.2(8) . . ?
C102 C101 Ni 69.6(7) . . ?
C107 C101 Ni 121.4(6) . . ?
C106 C101 Ni 123.3(6) . . ?
C101 C102 C103 117.7(7) . . ?
C101 C102 C110 118.1(7) . . ?
C103 C102 C110 104.1(8) . . ?
C101 C102 Ni 70.5(7) . . ?
C103 C102 Ni 122.9(6) . . ?
C110 C102 Ni 121.5(6) . . ?
C104 C103 C112 118.1(7) . . ?
C104 C103 C102 121.6(8) . . ?
C112 C103 C102 110.6(7) . . ?
C103 C104 C105 120.0(7) . . ?
C103 C104 C124 118.7(8) . . ?
C105 C104 C124 108.3(8) . . ?
C106 C105 C126 121.3(8) . . ?
C106 C105 C104 119.1(7) . . ?
C126 C105 C104 108.7(8) . . ?
C105 C106 C113 119.3(7) . . ?
C105 C106 C101 123.9(8) . . ?
C113 C106 C101 108.3(8) . . ?
C108 C107 C114 118.5(7) . . ?
C108 C107 C101 120.7(8) . . ?
C114 C107 C101 112.1(8) . . ?
C107 C108 C109 120.5(7) . . ?
C107 C108 C117 120.0(8) . . ?
C109 C108 C117 106.6(8) . . ?
C110 C109 C108 120.3(7) . . ?
C110 C109 C119 120.0(8) . . ?
C108 C109 C119 108.5(8) . . ?
C109 C110 C111 119.9(7) . . ?
C109 C110 C102 121.1(8) . . ?
C111 C110 C102 109.2(7) . . ?
C121 C111 C110 121.2(8) . . ?
C121 C111 C112 118.4(8) . . ?
C110 C111 C112 108.3(6) . . ?
C122 C112 C103 122.9(8) . . ?
C122 C112 C111 118.9(7) . . ?
C103 C112 C111 107.3(7) . . ?
C128 C113 C106 120.3(9) . . ?
C128 C113 C114 119.7(8) . . ?
C106 C113 C114 108.6(7) . . ?
C115 C114 C107 123.4(9) . . ?
C115 C114 C113 118.4(8) . . ?
C107 C114 C113 106.0(7) . . ?
C114 C115 C130 124.8(10) . . ?
C114 C115 C116 116.1(8) . . ?
C130 C115 C116 107.9(8) . . ?
C117 C116 C115 119.7(8) . . ?
C117 C116 C123 120.9(9) . 5_665 ?
C115 C116 C123 104.8(7) . 5_665 ?
C116 C117 C118 119.6(9) . . ?
C116 C117 C108 122.0(9) . . ?
C118 C117 C108 109.1(8) . . ?
C125 C118 C119 120.0(8) 5_665 . ?
C125 C118 C117 118.9(8) 5_665 . ?
C119 C118 C117 108.0(8) . . ?
C120 C119 C118 119.8(8) . . ?
C120 C119 C109 121.8(9) . . ?
C118 C119 C109 107.8(8) . . ?
C119 C120 C127 120.5(9) . 5_665 ?
C119 C120 C121 120.6(7) . . ?
C127 C120 C121 105.5(7) 5_665 . ?
C129 C121 C111 125.1(10) 5_665 . ?
C129 C121 C120 107.5(9) 5_665 . ?
C111 C121 C120 116.3(8) . . ?
C130 C122 C112 123.6(10) 5_665 . ?
C130 C122 C123 108.4(8) 5_665 . ?
C112 C122 C123 115.5(8) . . ?
C124 C123 C122 120.7(8) . . ?
C124 C123 C116 120.4(9) . 5_665 ?
C122 C123 C116 105.2(8) . 5_665 ?
C123 C124 C125 120.2(9) . . ?
C123 C124 C104 124.1(9) . . ?
C125 C124 C104 106.3(8) . . ?
C118 C125 C126 118.7(8) 5_665 . ?
C118 C125 C124 119.7(8) 5_665 . ?
C126 C125 C124 109.0(7) . . ?
C127 C126 C105 122.0(9) . . ?
C127 C126 C125 119.2(8) . . ?
C105 C126 C125 107.7(8) . . ?
C126 C127 C120 121.8(9) . 5_665 ?
C126 C127 C128 119.6(8) . . ?
C120 C127 C128 106.1(7) 5_665 . ?
C129 C128 C113 122.7(10) . . ?
C129 C128 C127 107.8(8) . . ?
C113 C128 C127 117.5(8) . . ?
C121 C129 C128 113.0(11) 5_665 . ?
C121 C129 C130 116.4(8) 5_665 . ?
C128 C129 C130 117.6(8) . . ?
C115 C130 C122 113.6(11) . 5_665 ?
C115 C130 C129 116.8(9) . . ?
C122 C130 C129 117.5(8) 5_665 . ?
C202 C201 C207 118.8(8) . . ?
C202 C201 C206 117.4(8) . . ?
C207 C201 C206 104.2(8) . . ?
C202 C201 Ni 71.5(8) . . ?
C207 C201 Ni 122.7(6) . . ?
C206 C201 Ni 120.4(6) . . ?
C201 C202 C203 117.6(8) . . ?
C201 C202 C210 118.0(8) . . ?
C203 C202 C210 104.0(8) . . ?
C201 C202 Ni 68.6(7) . . ?
C203 C202 Ni 122.0(6) . . ?
C210 C202 Ni 123.9(7) . . ?
C204 C203 C212 118.1(7) . . ?
C204 C203 C202 121.6(8) . . ?
C212 C203 C202 110.6(7) . . ?
C203 C204 C205 120.0(7) . . ?
C203 C204 C224 118.7(8) . . ?
C205 C204 C224 108.4(8) . . ?
C206 C205 C226 121.4(8) . . ?
C206 C205 C204 119.1(7) . . ?
C226 C205 C204 108.6(8) . . ?
C205 C206 C213 119.2(7) . . ?
C205 C206 C201 123.8(8) . . ?
C213 C206 C201 108.3(8) . . ?
C208 C207 C214 118.5(8) . . ?
C208 C207 C201 120.7(8) . . ?
C214 C207 C201 112.1(8) . . ?
C207 C208 C209 120.4(7) . . ?
C207 C208 C217 120.1(8) . . ?
C209 C208 C217 106.6(8) . . ?
C210 C209 C208 120.4(7) . . ?
C210 C209 C219 120.1(8) . . ?
C208 C209 C219 108.5(8) . . ?
C209 C210 C211 119.8(7) . . ?
C209 C210 C202 121.1(8) . . ?
C211 C210 C202 109.2(8) . . ?
C221 C211 C210 121.2(8) . . ?
C221 C211 C212 118.5(8) . . ?
C210 C211 C212 108.3(7) . . ?
C222 C212 C203 122.9(8) . . ?
C222 C212 C211 118.8(8) . . ?
C203 C212 C211 107.3(7) . . ?
C228 C213 C206 120.3(9) . . ?
C228 C213 C214 119.7(8) . . ?
C206 C213 C214 108.6(7) . . ?
C215 C214 C207 123.4(9) . . ?
C215 C214 C213 118.3(8) . . ?
C207 C214 C213 106.0(7) . . ?
C214 C215 C230 124.8(10) . . ?
C214 C215 C216 116.2(8) . . ?
C230 C215 C216 108.0(8) . . ?
C217 C216 C223 120.3(10) . 5_665 ?
C217 C216 C215 119.7(8) . . ?
C223 C216 C215 105.2(8) 5_665 . ?
C216 C217 C218 119.5(9) . . ?
C216 C217 C208 121.9(9) . . ?
C218 C217 C208 109.0(9) . . ?
C225 C218 C219 120.0(9) 5_665 . ?
C225 C218 C217 119.7(9) 5_665 . ?
C219 C218 C217 108.0(8) . . ?
C220 C219 C218 119.8(8) . . ?
C220 C219 C209 121.8(9) . . ?
C218 C219 C209 107.8(8) . . ?
C219 C220 C227 120.4(9) . 5_665 ?
C219 C220 C221 120.6(8) . . ?
C227 C220 C221 106.0(9) 5_665 . ?
C229 C221 C211 124.8(11) 5_665 . ?
C229 C221 C220 106.3(10) 5_665 . ?
C211 C221 C220 116.4(8) . . ?
C230 C222 C212 124.0(11) 5_665 . ?
C230 C222 C223 109.3(11) 5_665 . ?
C212 C222 C223 115.4(8) . . ?
C224 C223 C216 122.2(10) . 5_665 ?
C224 C223 C222 120.8(8) . . ?
C216 C223 C222 105.2(9) 5_665 . ?
C223 C224 C225 120.1(9) . . ?
C223 C224 C204 124.1(10) . . ?
C225 C224 C204 106.2(8) . . ?
C218 C225 C226 119.7(9) 5_665 . ?
C218 C225 C224 118.0(9) 5_665 . ?
C226 C225 C224 109.0(7) . . ?
C227 C226 C205 122.0(9) . . ?
C227 C226 C225 119.1(9) . . ?
C205 C226 C225 107.7(8) . . ?
C226 C227 C228 119.5(8) . . ?
C226 C227 C220 120.9(10) . 5_665 ?
C228 C227 C220 105.3(8) . 5_665 ?
C229 C228 C213 122.8(10) . . ?
C229 C228 C227 107.7(8) . . ?
C213 C228 C227 117.6(8) . . ?
C228 C229 C221 114.6(13) . 5_665 ?
C228 C229 C230 117.4(8) . . ?
C221 C229 C230 115.8(10) 5_665 . ?
C222 C230 C215 112.3(12) 5_665 . ?
C222 C230 C229 118.2(11) 5_665 . ?
C215 C230 C229 116.9(9) . . ?
 
_refine_diff_density_max    1.218
_refine_diff_density_min   -0.657
_refine_diff_density_rms    0.137

_shelxl_version_number 2013-4

_shelx_res_file
;
TITL kon4_2_280K_0m_s in Pbna
CELL  0.71073  11.0872  19.3854  16.4838   90.000   90.000   90.000
ZERR     4.00   0.0019   0.0030   0.0030    0.000    0.000    0.000
LATT   1
SYMM  1/2 - X, - Y, 1/2 + Z
SYMM    X, 1/2 - Y, - Z
SYMM  1/2 - X, 1/2 + Y, 1/2 - Z
SFAC  C    H    P    NI
UNIT  264  72   8    4
MERG   2
delu 0.002 0.003
isor 0.006 C101 > last
FMAP   2
PLAN   60
SIZE     0.040   0.120   0.400
ACTA
BOND
L.S.  16
TEMP     7.00
WGHT    0.123600   12.327001
FVAR       0.09789   1.39000   1.45000   0.60750
MOLE    1
NI    4    0.755767    0.750000    0.000000    10.50000    0.01994    0.01166 =
         0.02374    0.00041    0.00000    0.00000
P     3    0.887440    0.745827   -0.106641    11.00000    0.02463    0.01946 =
         0.03172   -0.00056    0.00686    0.00022
C1    1    0.819153    0.751320   -0.206978    11.00000    0.05526    0.04013 =
         0.02635    0.00329    0.00782    0.00079
AFIX  33
H1A   2    0.758508    0.716270   -0.212346    11.00000   -1.50000
H1B   2    0.880065    0.744669   -0.247623    11.00000   -1.50000
H1C   2    0.782908    0.795915   -0.213828    11.00000   -1.50000
AFIX   0
C2    1    0.996794    0.816218   -0.111330    11.00000    0.04280    0.04261 =
         0.07043   -0.01098    0.02350   -0.02116
AFIX  33
H2A   2    1.039691    0.818952   -0.060843    11.00000   -1.50000
H2B   2    0.955350    0.858915   -0.120991    11.00000   -1.50000
H2C   2    1.052802    0.807773   -0.154620    11.00000   -1.50000
AFIX   0
C3    1    0.991038    0.673055   -0.119038    11.00000    0.03475    0.03900 =
         0.06022    0.00345    0.01982    0.01301
AFIX  33
H3A   2    1.033203    0.665110   -0.069036    11.00000   -1.50000
H3B   2    1.048075    0.683380   -0.161140    11.00000   -1.50000
H3C   2    0.946164    0.632511   -0.133438    11.00000   -1.50000
AFIX   0
MOLE    2
PART    1
C101  1    0.632147    0.671501   -0.036008    41.00000    0.02816    0.00974 =
         0.02896    0.00343   -0.00207   -0.00499
C102  1    0.694463    0.651562    0.037880    41.00000    0.02565    0.01474 =
         0.02585   -0.00039   -0.00135   -0.00649
C103  1    0.621135    0.641098    0.111514    41.00000    0.03652    0.01906 =
         0.02335   -0.00562    0.00035   -0.01106
C104  1    0.497664    0.655463    0.112657    41.00000    0.03892    0.02187 =
         0.03802   -0.01782    0.01149   -0.00473
C105  1    0.436046    0.674404    0.038092    41.00000    0.03005    0.00626 =
         0.05562   -0.00940    0.00537    0.00424
C106  1    0.500621    0.679568   -0.031645    41.00000    0.02909    0.00758 =
         0.04595    0.00516   -0.00490    0.00082
C107  1    0.651681    0.630766   -0.109471    41.00000    0.03346    0.02279 =
         0.02440    0.00234    0.00274   -0.01400
C108  1    0.736859    0.577625   -0.110784    41.00000    0.03028    0.02763 =
         0.03244   -0.00271    0.01739   -0.01274
C109  1    0.796950    0.556605   -0.037231    41.00000    0.02198    0.01870 =
         0.04578   -0.00109    0.01149   -0.00687
C110  1    0.773816    0.590453    0.035160    41.00000    0.02242    0.01755 =
         0.03647    0.00256   -0.00383   -0.00557
C111  1    0.758988    0.551249    0.109092    41.00000    0.03185    0.02539 =
         0.03772    0.00814   -0.01580   -0.00863
C112  1    0.663174    0.582532    0.156067    41.00000    0.04160    0.02486 =
         0.02136   -0.00004   -0.01089   -0.01902
C113  1    0.449030    0.654013   -0.106629    41.00000    0.03731    0.02149 =
         0.04564    0.01709   -0.01754   -0.00389
C114  1    0.545045    0.622722   -0.154905    41.00000    0.04624    0.02592 =
         0.02640    0.01279   -0.00881   -0.01774
C115  1    0.518734    0.564346   -0.199450    41.00000    0.06241    0.03954 =
         0.02646    0.00589   -0.00653   -0.02827
C116  1    0.616165    0.508102   -0.200654    41.00000    0.06420    0.04520 =
         0.02747   -0.01080    0.02039   -0.02285
C117  1    0.713212    0.515367   -0.156476    41.00000    0.04973    0.03511 =
         0.03877   -0.01389    0.02567   -0.01421
C118  1    0.760273    0.457230   -0.112668    41.00000    0.04338    0.02994 =
         0.06428   -0.01630    0.02571   -0.00671
C119  1    0.810387    0.482035   -0.038330    41.00000    0.02217    0.02133 =
         0.07389   -0.00710    0.01081    0.00020
C120  1    0.800709    0.444773    0.028042    41.00000    0.02485    0.01898 =
         0.08285    0.00349   -0.00928    0.00003
C121  1    0.769558    0.478790    0.109437    41.00000    0.03466    0.02686 =
         0.06151    0.01199   -0.02856    0.00144
C122  1    0.585649    0.539555    0.201548    41.00000    0.06088    0.04475 =
         0.01710    0.00575   -0.00747   -0.02647
C123  1    0.453874    0.560096    0.201199    41.00000    0.06049    0.04790 =
         0.02307   -0.01669    0.01728   -0.02287
C124  1    0.418007    0.610535    0.159597    41.00000    0.04965    0.03707 =
         0.03907   -0.02208    0.02409   -0.01179
C125  1    0.305161    0.605926    0.113898    41.00000    0.03479    0.03511 =
         0.06522   -0.02163    0.02732   -0.00310
C126  1    0.317688    0.644468    0.038905    41.00000    0.02410    0.02320 =
         0.08157   -0.00678    0.00806    0.00731
C127  1    0.266250    0.621111   -0.027125    41.00000    0.02515    0.02038 =
         0.08649    0.00725   -0.00830    0.00556
C128  1    0.333298    0.624727   -0.107112    41.00000    0.03293    0.02745 =
         0.06755    0.02453   -0.02463   -0.00160
C129  1    0.305388    0.565710   -0.151044    41.00000    0.04487    0.04497 =
         0.05134    0.02099   -0.03273   -0.01247
C130  1    0.407418    0.532161   -0.201294    41.00000    0.06079    0.04435 =
         0.02745    0.01614   -0.02089   -0.02853
PART    2
same 0.002 0.003 c101 > c130
C201  1    0.675527    0.657585    0.040109   -41.00000    0.02367    0.01339 =
         0.02372   -0.00199   -0.00138   -0.00525
C202  1    0.648316    0.666411   -0.045469   -41.00000    0.02685    0.01360 =
         0.02464    0.00235   -0.00204   -0.00439
C203  1    0.697236    0.614950   -0.102607   -41.00000    0.02750    0.02043 =
         0.02371    0.00113    0.00732   -0.00874
C204  1    0.776185    0.563173   -0.077050   -41.00000    0.02287    0.02529 =
         0.03478   -0.00554    0.01103   -0.00260
C205  1    0.802480    0.554783    0.008761   -41.00000    0.01847    0.02409 =
         0.04146    0.00000   -0.00029    0.00114
C206  1    0.750786    0.598412    0.063057   -41.00000    0.02091    0.01723 =
         0.02690    0.00299   -0.00388   -0.00667
C207  1    0.576021    0.656208    0.098243   -41.00000    0.03276    0.01459 =
         0.02855   -0.01137    0.00691   -0.00662
C208  1    0.457827    0.669475    0.073244   -41.00000    0.03174    0.01489 =
         0.04035   -0.00962    0.01287    0.00074
C209  1    0.429941    0.676928   -0.011753   -41.00000    0.03070    0.01553 =
         0.04806    0.00079    0.00220    0.00371
C210  1    0.520577    0.673253   -0.069451   -41.00000    0.02961    0.01088 =
         0.02986    0.00854   -0.00634   -0.00274
C211  1    0.500604    0.635380   -0.143779   -41.00000    0.03706    0.01373 =
         0.02419    0.01419   -0.00823   -0.01068
C212  1    0.609951    0.598095   -0.163335   -41.00000    0.04133    0.02901 =
         0.02198    0.00031    0.00215   -0.01223
C213  1    0.706032    0.571110    0.139196   -41.00000    0.03096    0.02650 =
         0.02498    0.00576   -0.00858   -0.01407
C214  1    0.594954    0.607489    0.160335   -41.00000    0.04146    0.03211 =
         0.01728   -0.00947    0.00216   -0.01426
C215  1    0.503001    0.570508    0.196347   -41.00000    0.04954    0.04264 =
         0.02010   -0.01070    0.01214   -0.01798
C216  1    0.374600    0.587888    0.168154   -41.00000    0.04380    0.03516 =
         0.03938   -0.01414    0.02230   -0.01334
C217  1    0.358382    0.632169    0.109334   -41.00000    0.03588    0.02794 =
         0.05269   -0.01249    0.01931   -0.00610
C218  1    0.269705    0.618152    0.047934   -41.00000    0.02553    0.02949 =
         0.06705   -0.00493    0.01269    0.00426
C219  1    0.313624    0.644995   -0.027182   -41.00000    0.02696    0.02646 =
         0.06666    0.00814   -0.00189    0.00374
C220  1    0.290640    0.612176   -0.095256   -41.00000    0.02493    0.03485 =
         0.05981    0.01905   -0.01811    0.00208
C221  1    0.388779    0.603749   -0.160145   -41.00000    0.04035    0.03390 =
         0.03968    0.01599   -0.01954   -0.01437
C222  1    0.600271    0.531685   -0.198049   -41.00000    0.05439    0.03328 =
         0.01727   -0.00494    0.01517   -0.01422
C223  1    0.690992    0.479195   -0.167926   -41.00000    0.05090    0.03235 =
         0.03999   -0.01219    0.01737   -0.00977
C224  1    0.766050    0.494701   -0.113601   -41.00000    0.03236    0.02702 =
         0.04790   -0.01087    0.02088   -0.00544
C225  1    0.794705    0.445264   -0.049359   -41.00000    0.02673    0.02641 =
         0.06414   -0.00860    0.01095    0.00417
C226  1    0.815137    0.482549    0.025737   -41.00000    0.02731    0.02325 =
         0.06151    0.00023   -0.00443    0.00145
C227  1    0.778622    0.455364    0.094166   -41.00000    0.02800    0.03170 =
         0.05673    0.01240   -0.02213    0.00664
C228  1    0.717307    0.500600    0.156770   -41.00000    0.03981    0.02901 =
         0.03332    0.01223   -0.02046   -0.01665
C229  1    0.625209    0.462324    0.191933   -41.00000    0.04287    0.03331 =
         0.02453    0.01510   -0.02613   -0.02291
C230  1    0.507263    0.500721    0.213526   -41.00000    0.06101    0.04965 =
         0.02696    0.00723    0.00325   -0.01858
HKLF    4

REM  kon4_2_280K_0m_s in Pbna
REM R1 =  0.0774 for    2463 Fo > 4sig(Fo)  and  0.1527 for all    4684 data
REM    585 parameters refined using    716 restraints

END

WGHT      0.1289     12.1183

REM Highest difference peak  1.218,  deepest hole -0.657,  1-sigma level  0.137
Q1    1   0.3156  0.6354 -0.0683  11.00000  0.05    1.22
Q2    1   0.7984  0.4819  0.0670  11.00000  0.05    1.10
Q3    1   0.3206  0.6385  0.0751  11.00000  0.05    1.10
Q4    1   0.7973  0.4824 -0.0764  11.00000  0.05    1.06
Q5    1   0.6594  0.4486  0.1767  11.00000  0.05    1.03
Q6    1   0.4406  0.6708 -0.0558  11.00000  0.05    0.90
Q7    1   0.3342  0.6021  0.1439  11.00000  0.05    0.83
Q8    1   0.5590  0.5209 -0.2110  11.00000  0.05    0.83
Q9    1   0.4572  0.5928  0.1846  11.00000  0.05    0.82
Q10   1   0.5095  0.5398  0.2070  11.00000  0.05    0.81
Q11   1   0.3253  0.6028 -0.1364  11.00000  0.05    0.80
Q12   1   0.7392  0.4695 -0.1454  11.00000  0.05    0.79
Q13   1   0.4564  0.5899 -0.1838  11.00000  0.05    0.76
Q14   1   0.7997  0.4435 -0.0096  11.00000  0.05    0.73
Q15   1   0.6600  0.5261 -0.1810  11.00000  0.05    0.71
Q16   1   0.2605  0.6235  0.0098  11.00000  0.05    0.70
Q17   1   0.7439  0.4668  0.1360  11.00000  0.05    0.69
Q18   1   0.4401  0.5111 -0.2078  11.00000  0.05    0.67
Q19   1   0.5312  0.6361  0.1434  11.00000  0.05    0.63
Q20   1   0.6477  0.5301  0.1860  11.00000  0.05    0.59
Q21   1   0.5426  0.6598  0.0785  11.00000  0.05    0.59
Q22   1   0.8253  0.7514 -0.0589  11.00000  0.05    0.55
Q23   1   0.4837  0.6785  0.0022  11.00000  0.05    0.54
Q24   1   0.6833  0.5885 -0.1384  11.00000  0.05    0.54
Q25   1   0.5566  0.6632 -0.0815  11.00000  0.05    0.53
Q26   1   0.7958  0.5572  0.0486  11.00000  0.05    0.53
Q27   1   0.4302  0.6706  0.0783  11.00000  0.05    0.50
Q28   1   0.8387  0.7469 -0.1580  11.00000  0.05    0.44
Q29   1   0.7208  0.6087 -0.0919  11.00000  0.05    0.43
Q30   1   0.5799  0.6685 -0.0208  11.00000  0.05    0.43
Q31   1   0.7773  0.5861  0.0010  11.00000  0.05    0.41
Q32   1   0.7288  0.5997  0.0955  11.00000  0.05    0.40
Q33   1   0.6458  0.6595  0.0173  11.00000  0.05    0.40
Q34   1   0.6554  0.6503  0.0703  11.00000  0.05    0.40
Q35   1   0.9778  0.7466 -0.1093  11.00000  0.05    0.39
Q36   1   0.6696  0.4487 -0.1756  11.00000  0.05    0.38
Q37   1   0.9636  0.7279 -0.0980  11.00000  0.05    0.37
Q38   1   0.9310  0.7668 -0.1843  11.00000  0.05    0.36
Q39   1   0.9071  0.7514 -0.0399  11.00000  0.05    0.36
Q40   1   0.6005  0.6308 -0.1160  11.00000  0.05    0.36
Q41   1   0.9866  0.7766  0.0006  11.00000  0.05    0.35
Q42   1   0.6778  0.6523 -0.0469  11.00000  0.05    0.35
Q43   1   0.6519  0.7500  0.0000  10.50000  0.05    0.34
Q44   1   0.6780  0.7594 -0.0424  11.00000  0.05    0.34
Q45   1   0.4378  0.6441 -0.1478  11.00000  0.05    0.33
Q46   1   0.6643  0.6316  0.1126  11.00000  0.05    0.32
Q47   1   1.0271  0.7277 -0.0516  11.00000  0.05    0.30
Q48   1   0.9623  0.7785 -0.0819  11.00000  0.05    0.29
Q49   1   1.0483  0.7433 -0.0927  11.00000  0.05    0.29
Q50   1   0.7086  0.5698 -0.0821  11.00000  0.05    0.28
Q51   1   0.7449  0.7483 -0.2592  11.00000  0.05    0.27
Q52   1   0.2182  0.5958  0.1234  11.00000  0.05    0.27
Q53   1   0.6844  0.7510 -0.2118  11.00000  0.05    0.27
Q54   1   0.9462  0.6815 -0.1441  11.00000  0.05    0.27
Q55   1   1.0141  0.7748 -0.0520  11.00000  0.05    0.27
Q56   1   1.0077  0.8215 -0.1410  11.00000  0.05    0.26
Q57   1   1.1591  0.6782 -0.1122  11.00000  0.05    0.26
Q58   1   0.8208  0.4788  0.1133  11.00000  0.05    0.25
Q59   1   0.9448  0.7316 -0.1877  11.00000  0.05    0.24
Q60   1   0.9905  0.7490 -0.2214  11.00000  0.05    0.24
;
_shelx_res_checksum   65254


_shelx_hkl_file
;
  -1   0   0   -1.09    0.16
   1   0   0   -1.04    0.16
  -2   0   0  681.42   11.33
   2   0   0  690.95   11.69
  -2   0   0  698.55   11.56
  -3   0   0   -0.01    0.49
  -3   0   0    0.37    0.41
   3   0   0    0.47    0.56
  -4   0   0  400.84    6.90
  -4   0   0  388.96    7.25
   4   0   0  380.14    7.39
  -5   0   0   -0.39    0.47
  -5   0   0   -1.05    0.58
   5   0   0   -1.02    0.62
  -6   0   0   16.36    0.92
   6   0   0   15.54    1.26
  -6   0   0   16.04    1.24
  -7   0   0   -0.48    0.55
   7   0   0    0.48    0.97
  -7   0   0   -1.39    0.74
   8   0   0   56.67    2.61
  -8   0   0   55.55    2.38
  -8   0   0   56.88    1.89
   9   0   0    2.95    1.17
  -9   0   0   -0.28    1.11
  10   0   0   11.02    1.62
 -10   0   0    9.18    1.49
 -11   0   0    0.34    1.31
  11   0   0    0.53    1.48
 -12   0   0    3.97    1.52
  12   0   0    2.11    1.68
  13   0   0    0.57    1.80
 -13   0   0    1.02    1.57
  14   0   0   10.69    2.24
   1   0  -1  438.73    7.08
   1   0   1  417.27    7.24
   2   0   1   -0.34    0.42
  -2   0  -1   -0.46    0.32
   2   0  -1   -0.16    0.36
  -2   0  -1   -0.49    0.34
  -2   0   1    0.50    0.30
  -2   0   1    0.33    0.42
   3   0  -1   12.53    0.82
   3   0   1   12.06    0.87
  -3   0   1   12.41    0.82
  -3   0   1   13.12    0.63
  -3   0  -1   12.87    0.68
  -3   0  -1   13.31    0.79
   4   0   1   -0.16    0.62
  -4   0   1    0.20    0.61
  -4   0  -1    0.05    0.60
   4   0  -1    0.36    0.61
  -4   0   1   -1.07    0.42
  -4   0  -1   -1.73    0.46
  -5   0  -1    3.09    0.74
   5   0  -1    2.54    0.73
   5   0   1    1.40    0.82
  -5   0   1    2.04    0.51
  -5   0   1    2.37    0.72
  -5   0  -1    3.15    0.57
   6   0  -1    0.33    0.72
   6   0   1    1.70    0.81
  -6   0   1   -0.14    0.72
  -6   0   1   -0.67    0.47
  -6   0  -1    0.30    0.69
  -6   0  -1    0.31    0.54
   7   0  -1   13.02    1.26
  -7   0  -1   12.62    0.96
  -7   0   1   14.40    1.29
  -7   0  -1   12.30    1.22
   7   0   1    9.78    1.22
  -7   0   1   12.68    0.92
  -8   0  -1    1.00    0.97
  -8   0   1    0.52    0.96
  -8   0  -1    0.23    0.67
   8   0   1    0.58    1.02
  -8   0   1   -0.41    0.60
   8   0  -1   -1.42    0.82
  -9   0   1   71.06    3.01
  -9   0  -1   68.48    2.81
   9   0  -1   66.86    2.96
   9   0   1   65.68    3.01
  10   0  -1   -0.95    1.16
  10   0   1    1.07    1.22
 -10   0  -1    1.32    1.17
 -10   0   1   -1.78    1.23
  11   0   1    1.03    1.38
 -11   0   1    1.47    1.42
 -11   0  -1   -0.35    1.22
  11   0  -1    1.11    1.35
  12   0  -1    2.34    1.69
 -12   0  -1    1.37    1.34
  12   0   1   -2.11    1.38
 -12   0   1    2.34    1.62
  13   0   1    2.55    1.75
 -13   0  -1   -0.06    1.51
 -13   0   1    0.61    1.57
  13   0  -1    0.14    1.76
  14   0  -1    0.55    1.91
 -14   0   1   -0.75    1.73
  14   0   1   -2.64    1.79
   0   0  -2  998.82   16.49
   0   0  -2  980.46   16.09
   0   0   2  975.33   16.00
  -1   0  -2   -0.20    0.30
   1   0  -2   -0.31    0.23
   1   0   2   -0.25    0.29
   1   0  -2   -0.30    0.27
   1   0   2   -0.20    0.23
  -1   0   2    0.28    0.31
   2   0   2 1000.00   16.30
   2   0  -2  994.13   16.48
   2   0   2  989.53   16.64
   2   0  -2  988.46   16.23
  -2   0   2  991.71   16.51
  -2   0  -2  985.57   16.37
   3   0  -2   -0.29    0.38
  -3   0   2    0.44    0.59
   3   0   2   -0.76    0.56
   3   0  -2   -0.06    0.46
  -3   0   2    0.14    0.41
  -3   0  -2   -0.12    0.44
  -3   0  -2    0.71    0.47
  -4   0  -2  293.87    5.53
  -4   0   2  297.49    5.31
  -4   0  -2  279.05    5.38
   4   0  -2  280.05    5.67
   4   0   2  283.97    5.88
  -4   0   2  291.70    5.79
   5   0  -2    0.19    0.69
  -5   0   2    0.17    0.68
   5   0   2   -0.05    0.70
  -5   0  -2   -0.08    0.60
  -5   0  -2    0.15    0.53
  -5   0   2    0.26    0.46
  -6   0   2   21.04    1.02
  -6   0  -2   22.44    1.30
   6   0   2   20.60    1.45
  -6   0   2   21.51    1.42
  -6   0  -2   22.67    1.14
   6   0  -2   22.76    1.43
   7   0   2   -0.27    0.84
   7   0  -2    0.04    0.76
  -7   0   2    0.89    0.96
  -7   0  -2   -1.08    0.58
  -7   0   2   -0.53    0.55
  -7   0  -2   -0.77    0.72
   8   0   2    7.15    1.33
  -8   0  -2    8.10    1.16
  -8   0   2    9.12    1.31
   8   0  -2    8.61    1.31
  -8   0   2    8.81    0.89
  -8   0  -2    8.53    0.92
   9   0  -2    1.06    1.09
  -9   0  -2    0.56    1.03
  -9   0   2    1.04    1.13
   9   0   2    0.37    1.11
  10   0   2    3.95    1.46
 -10   0  -2    3.39    1.16
  10   0  -2    0.82    1.31
 -10   0   2   -0.33    1.18
  11   0  -2    0.21    1.41
  11   0   2    0.42    1.46
 -11   0   2    1.49    1.53
 -11   0  -2    1.51    1.17
 -12   0   2    3.24    1.71
  12   0  -2    2.24    1.57
 -12   0  -2    3.48    1.41
  12   0   2    0.25    1.66
 -13   0   2    0.62    1.74
  13   0  -2    0.45    1.81
  13   0   2   -2.43    1.51
  14   0   2    3.97    1.90
 -14   0   2    7.58    2.06
  14   0  -2    1.05    1.80
   0   0   3    0.11    0.33
   0   0  -3    0.00    0.38
   0   0  -3   -0.34    0.29
   1   0   3  309.06    5.57
  -1   0   3  309.95    5.58
   1   0  -3  311.61    5.52
   1   0   3  305.02    5.37
  -1   0  -3  314.65    5.62
   1   0  -3  321.03    5.46
  -2   0  -3    0.15    0.52
  -2   0   3   -0.46    0.49
   2   0  -3   -0.58    0.44
   2   0   3   -0.45    0.37
   2   0   3   -0.33    0.51
   2   0  -3    0.48    0.41
   3   0  -3  153.60    3.02
   3   0   3  145.71    3.04
   3   0   3  148.95    3.39
   3   0  -3  145.68    3.16
  -3   0  -3  144.41    3.16
  -4   0   3    0.26    0.62
   4   0   3    0.14    0.66
  -4   0  -3    0.76    0.52
  -4   0  -3   -0.07    0.56
   4   0  -3   -0.60    0.51
   4   0  -3   -0.62    0.42
  -5   0  -3   21.52    1.12
   5   0  -3   22.24    0.97
   5   0  -3   21.37    1.21
  -5   0   3   21.23    1.31
  -5   0   3   21.14    0.99
  -5   0  -3   20.97    1.11
   5   0   3   18.93    1.33
   6   0   3   -0.24    0.77
  -6   0   3   -0.47    0.49
   6   0  -3    0.10    0.71
  -6   0  -3   -0.69    0.54
  -6   0   3   -0.20    0.76
  -6   0  -3    0.76    0.63
   6   0  -3    0.73    0.45
   7   0   3   28.12    1.84
  -7   0   3   36.27    1.91
   7   0  -3   35.47    1.35
   7   0  -3   35.31    1.85
  -7   0  -3   31.80    1.62
  -7   0  -3   38.21    1.59
  -7   0   3   34.29    1.39
   8   0  -3   -0.33    0.84
  -8   0  -3   -1.09    0.78
  -8   0   3   -1.28    0.92
  -8   0  -3   -0.20    0.70
   8   0   3   -1.08    0.94
  -9   0   3    4.33    1.29
   9   0   3    4.81    1.29
  -9   0  -3    3.47    1.09
   9   0  -3    2.06    1.19
 -10   0   3   -1.65    1.33
 -10   0  -3   -0.21    0.98
  10   0  -3   -1.16    1.18
  10   0   3    0.57    1.31
  11   0   3    1.26    1.46
  11   0  -3    0.05    1.32
 -11   0   3    0.29    1.53
 -11   0  -3    0.34    1.06
 -12   0   3   -0.69    1.46
  12   0  -3   -0.07    1.59
  12   0   3    1.12    1.66
  13   0  -3   -0.02    1.73
  13   0   3   -0.38    1.81
 -13   0   3   -1.05    1.65
 -14   0   3   -1.49    1.86
  14   0  -3   -3.51    1.57
  14   0   3   -1.63    1.91
 -15   0   3    1.65    2.15
   0   0   4  583.22    9.78
   0   0  -4  585.21    9.79
   0   0  -4  557.27    9.88
   0   0   4  569.97    9.75
   1   0  -4   -0.47    0.35
  -1   0   4   -0.23    0.47
  -1   0  -4    0.50    0.53
   1   0   4    0.45    0.40
   1   0  -4    0.04    0.53
   1   0   4   -0.16    0.47
   2   0  -4  119.39    2.59
   2   0  -4  116.68    2.53
   2   0   4  121.23    2.76
  -2   0  -4  120.15    2.74
  -2   0   4  116.70    2.76
   2   0   4  114.74    2.45
   3   0  -4   -0.89    0.51
   3   0   4    0.41    0.63
  -3   0  -4   -0.30    0.53
  -3   0   4   -0.50    0.59
   3   0  -4    0.13    0.51
   3   0   4    0.59    0.48
   4   0  -4   33.25    1.20
   4   0  -4   33.21    1.38
   4   0   4   32.88    1.56
   4   0   4   30.97    1.22
  -4   0  -4   33.01    1.22
  -4   0  -4   31.78    1.34
  -4   0   4   29.74    1.46
  -5   0  -4    0.06    0.55
   5   0   4   -0.31    0.71
  -5   0   4   -0.10    0.73
   5   0  -4    0.43    0.48
   5   0  -4   -0.73    0.61
  -5   0  -4    0.12    0.59
   6   0  -4   12.92    0.84
   6   0   4   12.58    1.29
   6   0  -4   12.51    1.14
  -6   0   4   13.74    1.29
  -6   0  -4   12.36    1.01
  -6   0  -4   12.54    0.99
  -7   0  -4    0.41    0.69
  -7   0   4    0.17    0.98
   7   0  -4   -0.62    0.47
   7   0  -4   -0.30    0.78
   7   0   4   -0.31    0.96
  -7   0  -4    0.29    0.70
  -8   0  -4   18.81    1.31
  -8   0  -4   18.66    1.38
  -8   0   4   18.69    1.75
   8   0  -4   19.90    1.55
   8   0   4   19.75    1.73
  -9   0   4    0.25    1.19
   9   0   4   -0.11    1.11
  -9   0  -4   -0.55    0.87
   9   0  -4    1.85    1.16
  10   0  -4   20.93    1.99
 -10   0  -4   18.80    1.63
 -10   0   4   15.36    1.86
  10   0   4   17.06    1.94
 -11   0   4   -2.14    1.32
  11   0   4   -2.34    1.52
  11   0  -4    2.68    1.52
  12   0  -4    9.95    1.92
 -12   0   4   10.58    1.94
  12   0   4   13.08    2.09
 -13   0   4    0.59    1.70
  13   0  -4   -0.97    1.62
  13   0   4   -1.02    1.54
  14   0   4   -0.67    1.75
  14   0  -4    4.41    1.91
 -14   0   4    0.48    2.00
   0   0   5   -0.28    0.50
   0   0  -5   -0.83    0.55
   0   0   5   -0.48    0.46
   0   0  -5   -0.43    0.43
   1   0  -5  355.48    6.54
   1   0   5  365.07    6.50
   1   0  -5  353.98    6.33
   1   0   5  339.01    6.25
  -1   0   5  351.56    6.49
  -1   0  -5  346.59    6.59
  -2   0   5    0.90    0.59
   2   0  -5    0.03    0.56
  -2   0  -5    0.34    0.59
   2   0   5   -0.75    0.57
   2   0  -5    0.16    0.48
   2   0   5   -0.59    0.44
   3   0   5   71.42    2.21
  -3   0   5   72.02    2.23
   3   0   5   68.82    1.83
  -3   0  -5   71.72    2.13
   3   0  -5   70.72    1.94
   3   0  -5   73.34    1.98
   4   0  -5    0.39    0.57
  -4   0  -5   -0.94    0.55
   4   0   5   -0.10    0.50
  -4   0   5   -0.12    0.66
   4   0  -5   -0.35    0.51
   4   0   5    1.01    0.71
  -5   0   5  104.88    3.13
   5   0  -5  103.51    2.85
   5   0   5   98.47    3.08
  -5   0  -5  105.87    2.87
  -5   0  -5  101.29    2.60
   5   0  -5  102.24    2.59
   6   0  -5    0.51    0.72
  -6   0  -5   -0.54    0.53
   6   0   5    1.11    0.85
  -6   0   5   -0.76    0.82
   6   0  -5   -0.40    0.50
  -6   0  -5   -1.21    0.64
   7   0  -5    9.39    0.86
  -7   0  -5   11.65    1.07
  -7   0   5   12.54    1.37
  -7   0  -5    9.85    1.07
   7   0   5   10.45    1.34
   7   0  -5   10.16    1.15
  -8   0   5    1.80    1.12
  -8   0  -5   -0.30    0.81
   8   0   5   -0.19    1.00
   8   0  -5    0.29    0.86
  -8   0  -5   -0.22    0.75
  -9   0  -5   42.18    2.04
   9   0   5   43.65    2.62
   9   0  -5   44.06    2.38
  -9   0  -5   41.87    2.10
  -9   0   5   40.67    2.50
  10   0  -5    2.46    1.29
  10   0   5    1.28    1.29
 -10   0   5    1.16    1.33
 -11   0   5   -0.90    1.44
  11   0  -5   -1.80    1.33
  11   0   5    2.17    1.61
  12   0  -5    0.29    1.52
 -12   0   5   -2.22    1.67
  12   0   5    1.99    1.81
  13   0  -5   -1.85    1.63
 -13   0   5   -1.36    1.87
  13   0   5   -0.29    1.61
 -14   0   5   -3.30    1.85
  14   0  -5   -0.08    1.60
  14   0   5   -1.15    1.67
   0   0   6   99.28    2.43
   0   0  -6   98.55    2.35
   0   0  -6  101.70    2.62
   0   0   6   99.72    2.36
   1   0   6   -0.13    0.48
   1   0   6   -0.07    0.52
   1   0  -6    0.35    0.61
  -1   0  -6    0.34    0.60
  -1   0   6   -0.36    0.52
   1   0  -6   -0.40    0.47
   2   0   6   40.65    1.35
  -2   0   6   43.82    1.60
   2   0  -6   42.95    1.53
  -2   0  -6   41.33    1.64
   2   0   6   40.40    1.52
   2   0  -6   40.48    1.36
  -3   0   6    0.92    0.68
   3   0  -6    0.74    0.61
  -3   0  -6   -0.07    0.65
   3   0   6   -0.88    0.44
   3   0  -6    0.27    0.53
   3   0   6   -0.16    0.67
  -4   0   6    7.29    0.98
   4   0   6    7.88    0.96
   4   0  -6    7.57    0.79
  -4   0  -6    8.15    0.96
   4   0  -6    7.24    0.79
   4   0   6    7.17    0.75
   5   0  -6    0.13    0.64
  -5   0  -6   -0.71    0.46
   5   0   6   -0.24    0.53
  -5   0  -6    0.14    0.72
   5   0  -6   -0.47    0.50
   5   0   6   -0.74    0.74
  -5   0   6    0.19    0.77
  -6   0   6    6.60    1.13
   6   0  -6    7.71    0.97
   6   0   6    7.66    1.16
  -6   0  -6    7.90    1.00
  -6   0  -6    8.19    0.84
   6   0  -6    8.15    0.80
  -7   0  -6    0.14    0.75
   7   0  -6   -0.80    0.53
  -7   0   6    1.25    1.00
  -7   0  -6    0.29    0.67
   7   0  -6   -0.47    0.79
   7   0   6    0.18    0.99
   8   0   6    1.32    1.16
  -8   0  -6    1.24    0.85
   8   0  -6    0.32    0.96
  -8   0  -6    0.11    0.80
  -8   0   6   -1.69    0.98
   9   0  -6   -0.97    1.00
  -9   0   6   -0.19    1.25
   9   0   6    0.85    1.28
  -9   0  -6   -0.14    0.99
  10   0   6    9.59    1.77
 -10   0   6   11.91    1.84
  10   0  -6    8.89    1.48
  11   0  -6   -1.65    1.27
 -11   0   6   -0.92    1.41
  11   0   6    0.46    1.49
 -12   0   6    6.84    2.11
  12   0   6   10.66    2.18
  12   0  -6   10.02    1.81
 -13   0   6    0.66    1.84
  13   0   6    0.29    1.79
  13   0  -6    0.60    1.67
  14   0  -6    1.21    1.99
 -14   0   6    2.75    2.02
   0   0  -7   -0.44    0.65
   0   0   7   -0.39    0.49
   0   0   7   -0.24    0.54
   0   0  -7    0.39    0.51
   1   0  -7   11.99    0.80
   1   0   7   11.75    0.87
  -1   0   7   13.31    0.95
   1   0  -7   10.86    0.95
   1   0   7   12.35    0.83
  -1   0  -7   12.63    1.01
  -2   0   7    0.43    0.62
   2   0  -7   -0.79    0.65
   2   0   7   -0.23    0.56
  -2   0  -7   -0.32    0.67
   2   0  -7    0.09    0.47
   2   0   7   -0.18    0.49
  -3   0  -7   68.09    2.28
   3   0   7   65.72    2.20
   3   0  -7   68.92    2.15
   3   0  -7   62.17    1.94
   3   0   7   68.68    1.92
  -3   0   7   65.06    2.26
   4   0   7   -1.13    0.75
  -4   0   7    0.84    0.85
   4   0   7    0.88    0.58
   4   0  -7   -1.25    0.48
  -4   0  -7    0.35    0.72
   4   0  -7   -1.12    0.55
   5   0  -7    5.27    0.81
   5   0  -7    6.44    0.81
   5   0   7    4.23    0.75
   5   0   7    5.98    1.10
  -5   0   7    5.28    1.02
  -5   0  -7    5.53    0.92
  -6   0   7   -0.13    0.92
   6   0  -7   -0.03    0.67
   6   0   7    0.53    0.66
   6   0  -7   -0.24    0.57
  -6   0  -7    0.03    0.53
   6   0   7    0.08    0.90
  -6   0  -7   -0.56    0.76
   7   0  -7    2.19    0.89
  -7   0   7    0.99    1.09
   7   0   7    2.39    1.10
  -7   0  -7    1.24    0.70
  -7   0  -7   -0.04    0.89
   7   0  -7    0.59    0.66
   8   0   7    1.74    1.26
   8   0  -7   -0.39    0.95
  -8   0  -7    0.05    0.93
  -8   0   7    1.50    1.22
   9   0   7    0.92    1.42
  -9   0   7    1.26    1.33
  -9   0  -7    1.13    1.12
   9   0  -7    1.57    1.13
  10   0   7    1.36    1.48
 -10   0   7   -2.31    1.36
  10   0  -7   -0.50    1.17
  11   0  -7   -2.48    1.22
  11   0   7    3.95    1.65
 -11   0   7   -2.68    1.64
 -12   0   7   -0.11    1.58
  12   0  -7   -1.05    1.39
  12   0   7   -1.36    1.54
 -13   0   7    1.28    2.01
  13   0   7    4.21    2.09
 -14   0   7   -1.80    2.09
   0   0   8   70.90    2.03
   0   0   8   69.49    2.10
   0   0  -8   67.10    2.31
   1   0  -8    0.09    0.53
   1   0  -8   -1.12    0.63
   1   0   8    1.31    0.61
  -1   0   8   -1.58    0.51
   1   0   8    0.30    0.56
  -1   0  -8    0.71    0.72
   2   0   8   84.18    2.28
   2   0   8   81.97    2.45
   2   0  -8   85.31    2.57
  -2   0  -8   82.24    2.65
   2   0  -8   88.92    2.33
  -2   0   8   83.76    2.56
  -3   0  -8    0.13    0.76
  -3   0   8   -0.81    0.73
   3   0  -8   -1.11    0.67
   3   0   8    0.04    0.72
   3   0   8    0.58    0.58
   3   0  -8   -0.55    0.51
  -4   0   8   75.39    2.64
   4   0  -8   73.93    2.27
   4   0  -8   71.86    2.35
   4   0   8   73.07    2.56
   4   0   8   71.64    2.11
  -4   0  -8   73.03    2.55
  -5   0  -8   -1.02    0.74
   5   0   8    0.33    0.87
   5   0  -8    1.14    0.65
   5   0  -8   -0.65    0.58
  -5   0   8    0.55    0.87
   5   0   8    0.07    0.54
   6   0   8   30.05    1.49
  -6   0  -8   31.72    1.79
   6   0  -8   30.42    1.65
  -6   0  -8   29.66    1.40
  -6   0   8   28.24    1.89
   6   0   8   27.17    1.82
   6   0  -8   26.88    1.48
  -7   0  -8   -0.96    0.88
   7   0  -8   -0.26    0.82
  -7   0   8   -1.77    1.01
   7   0   8    0.61    1.16
   7   0  -8    0.84    0.76
   8   0  -8   87.03    3.15
   8   0   8   82.23    3.52
  -8   0  -8   85.36    3.09
  -8   0   8   85.17    3.54
   9   0  -8    0.62    1.09
  -9   0   8   -0.36    1.33
   9   0   8    1.78    1.38
  -9   0  -8    1.01    1.14
  10   0   8    4.22    1.75
 -10   0   8    6.81    1.85
  10   0  -8    6.30    1.45
  11   0  -8    1.35    1.48
 -11   0   8    1.62    1.75
  11   0   8    0.77    1.61
  12   0   8    7.44    2.13
 -12   0   8    8.26    2.03
 -13   0   8   -2.84    1.85
  13   0   8    2.76    2.10
   0   0   9   -0.93    0.58
   0   0   9   -0.08    0.56
   0   0  -9   -0.52    0.79
  -1   0  -9   51.05    2.11
   1   0   9   53.51    1.82
   1   0  -9   52.43    2.10
  -1   0   9   53.09    1.96
   1   0  -9   50.77    1.77
   1   0   9   51.38    1.84
  -2   0   9   -1.14    0.63
   2   0   9    0.80    0.59
   2   0  -9    0.44    0.53
   2   0   9   -1.29    0.54
  -2   0  -9   -0.70    0.74
   2   0  -9   -0.07    0.69
   3   0   9   33.59    1.43
   3   0  -9   34.38    1.69
   3   0  -9   31.45    1.40
  -3   0  -9   32.13    1.75
   3   0   9   34.30    1.66
  -3   0   9   31.46    1.68
   4   0   9   -0.77    0.79
   4   0  -9    0.32    0.77
   4   0   9    0.38    0.61
   4   0  -9   -0.19    0.59
  -4   0  -9   -0.10    0.79
  -4   0   9    0.08    0.80
  -5   0   9    0.44    0.92
   5   0   9    1.59    0.98
   5   0  -9    1.10    0.68
   5   0  -9    0.11    0.73
   5   0   9   -0.01    0.65
  -5   0  -9    1.02    0.89
   6   0  -9    0.36    0.76
   6   0   9   -0.66    0.91
   6   0  -9   -0.19    0.77
  -6   0  -9   -0.29    0.88
   6   0   9    0.40    0.70
  -6   0   9   -0.77    1.01
   7   0  -9   -0.40    0.83
   7   0   9    1.33    1.17
   7   0  -9   -0.20    0.85
  -7   0  -9   -0.67    1.02
  -7   0   9    0.72    1.33
  -8   0  -9   -0.17    1.08
   8   0  -9    0.63    1.01
  -8   0   9    0.95    1.30
   8   0   9   -1.39    1.15
  -9   0   9   23.99    2.30
  -9   0  -9   25.30    1.91
   9   0  -9   22.80    1.84
   9   0   9   23.30    2.22
 -10   0   9    1.87    1.63
  10   0   9   -0.98    1.38
  11   0   9   -0.67    1.70
 -11   0   9    1.39    1.74
 -12   0   9   -3.12    1.69
  12   0   9   -1.84    1.69
  13   0   9    0.36    2.00
 -13   0   9   -0.50    1.93
   0   0 -10  256.83    6.01
   0   0  10  273.58    5.57
   0   0  10  265.40    5.66
   1   0  10   -0.79    0.62
   1   0 -10   -0.72    0.79
  -1   0 -10    1.40    0.86
  -1   0  10   -1.47    0.48
   1   0 -10   -0.26    0.52
  -1   0  10   -1.08    0.66
   1   0  10   -0.11    0.65
  -2   0 -10   -0.88    0.80
   2   0  10    0.23    0.61
   2   0 -10    0.63    0.54
   2   0  10    0.82    0.65
  -2   0  10   -0.52    0.70
   2   0 -10    0.08    0.85
   3   0 -10    0.34    0.80
  -3   0 -10   -0.13    0.80
   3   0 -10    0.56    0.59
  -3   0  10   -0.67    0.75
   3   0  10    0.09    0.66
   3   0  10    0.63    0.60
   4   0 -10    6.56    0.84
   4   0  10    6.78    1.07
   4   0  10    5.96    0.83
   4   0 -10    5.47    1.03
  -4   0 -10    4.36    1.04
  -4   0  10    5.51    1.07
  -5   0  10    0.69    0.98
  -5   0 -10   -0.05    0.93
   5   0 -10    0.09    0.72
   5   0 -10   -1.02    0.75
   5   0  10    0.35    0.68
   5   0  10    0.34    0.99
   6   0  10   49.70    2.51
   6   0 -10   50.26    2.13
  -6   0 -10   48.77    2.42
  -6   0  10   50.64    2.58
   6   0 -10   52.31    2.23
   7   0  10    0.91    1.17
  -7   0  10    0.60    1.22
  -7   0 -10   -1.05    1.10
   7   0 -10    0.79    0.90
   8   0 -10   66.57    2.80
  -8   0  10   61.19    3.20
   8   0  10   62.03    3.14
  -8   0 -10   63.85    2.88
  -9   0 -10   -1.78    1.17
   9   0  10    0.84    1.43
  -9   0  10   -2.80    1.47
 -10   0  10    0.36    1.69
  10   0  10    1.76    1.65
  11   0  10    0.11    1.67
 -11   0  10   -1.18    1.73
  12   0  10    5.02    2.00
 -12   0  10    3.65    2.01
   0   0 -11    1.00    0.89
   0   0  11    0.74    0.57
   0   0  11    0.96    0.74
  -1   0 -11    1.05    0.94
  -1   0  11    1.51    0.62
   1   0 -11    1.55    0.65
  -1   0  11    1.86    0.84
   1   0 -11    1.59    1.01
   1   0  11    1.83    0.72
   1   0  11    1.62    0.72
   2   0 -11   -0.27    0.58
  -2   0 -11   -0.55    0.88
   2   0  11   -0.49    0.62
   2   0 -11   -0.01    0.88
  -2   0  11   -1.27    0.75
   2   0  11    0.00    0.66
   3   0 -11    4.49    1.02
  -3   0 -11    6.40    1.16
  -3   0  11    3.12    1.04
   3   0 -11    2.70    0.70
   3   0  11    3.69    0.81
   3   0  11    3.79    0.90
  -4   0 -11   -2.34    0.93
   4   0  11   -0.09    0.93
   4   0  11    0.08    0.65
   4   0 -11   -1.72    0.86
   4   0 -11    0.46    0.63
  -4   0  11   -0.63    0.96
  -5   0  11    2.48    1.20
   5   0 -11    0.95    0.76
   5   0  11    2.00    1.08
  -5   0 -11    1.83    1.21
   5   0 -11    3.18    1.03
   6   0 -11    0.98    0.89
   6   0 -11   -0.78    0.78
   6   0  11   -0.29    1.17
  -6   0  11    0.40    1.15
  -6   0 -11   -1.47    0.98
   7   0  11   -0.73    1.17
  -7   0  11   -1.77    1.28
  -7   0 -11    1.97    1.21
  -8   0  11   -1.91    1.28
   8   0  11   -1.42    1.38
  -8   0 -11    1.34    1.16
  -9   0 -11   10.20    1.72
  -9   0  11   11.33    1.93
   9   0  11   11.90    2.00
 -10   0  11    0.55    1.60
  10   0  11    1.03    1.53
  11   0  11   -2.01    1.75
 -11   0  11    2.12    1.82
 -12   0  11    0.67    1.94
  12   0  11    1.42    2.05
   0   0 -12   30.62    1.90
   0   0  12   32.93    1.70
   0   0  12   28.40    1.47
   1   0 -12   -1.03    0.96
  -1   0  12   -1.07    0.80
   1   0  12    0.83    0.70
  -1   0  12   -0.02    0.58
   1   0  12    0.21    0.70
  -1   0 -12    0.31    1.00
  -2   0  12   29.99    1.79
   2   0 -12   30.56    1.94
  -2   0 -12   31.60    1.98
   2   0  12   30.33    1.57
   2   0  12   29.64    1.63
   2   0 -12   28.33    1.47
   3   0 -12   -0.83    1.01
   3   0  12    0.52    0.79
   3   0  12   -0.82    0.75
  -3   0  12   -0.98    0.85
   3   0 -12   -1.22    0.60
  -3   0 -12   -0.92    0.95
  -4   0  12    5.73    1.27
   4   0  12    5.93    1.17
  -4   0 -12    3.99    1.24
   4   0 -12    3.97    1.13
   4   0 -12    5.30    0.88
  -5   0 -12    0.64    1.10
  -5   0  12   -0.44    1.04
   5   0  12    0.61    0.95
   5   0 -12    0.21    1.05
   6   0  12   32.85    2.21
  -6   0 -12   32.24    2.20
  -6   0  12   34.81    2.44
   6   0 -12   31.66    1.99
   7   0  12    1.00    1.23
  -7   0  12    0.69    1.32
  -7   0 -12   -1.01    1.13
   8   0  12    2.15    1.56
  -8   0  12    0.48    1.46
  -8   0 -12   -1.90    1.27
  -9   0 -12   -1.60    1.31
   9   0  12    3.69    1.75
  -9   0  12   -1.60    1.46
 -10   0  12   12.08    2.16
  10   0  12   10.52    2.03
  11   0  12    0.31    1.80
 -11   0  12    1.36    1.94
  12   0  12    0.06    2.06
 -12   0  12    5.19    2.00
   0   0  13    0.43    0.86
   0   0 -13   -0.87    1.01
   0   0  13   -0.29    0.70
  -1   0  13   -1.73    0.86
  -1   0 -13   -1.05    1.03
  -1   0  13    0.43    0.68
   1   0  13    1.04    0.78
   1   0 -13    1.15    1.09
   1   0  13    1.91    0.86
   2   0  13   -0.09    0.75
   2   0 -13    0.50    0.70
   2   0 -13   -0.63    1.12
  -2   0 -13    0.06    1.05
   2   0  13   -0.66    0.81
  -2   0  13   -0.25    0.98
   3   0 -13    1.07    1.21
   3   0  13    1.94    0.99
  -3   0  13    2.15    1.17
  -3   0 -13   -0.87    1.13
   4   0  13   -0.64    0.96
   4   0 -13    0.98    1.13
  -4   0  13   -0.64    1.22
  -4   0 -13   -0.95    1.12
   5   0 -13    0.85    1.02
   5   0  13    0.63    1.01
  -5   0 -13   -0.79    1.36
  -5   0  13   -0.77    1.36
  -6   0  13   -1.58    1.21
  -6   0 -13    0.60    1.28
   6   0 -13   -0.63    0.99
   6   0  13    0.26    1.24
  -7   0  13    1.28    1.51
  -7   0 -13   -0.94    1.22
   7   0  13    0.41    1.37
   8   0  13   -2.02    1.31
  -8   0 -13   -4.06    1.13
  -8   0  13   -1.10    1.46
  -9   0  13    2.65    1.86
   9   0  13    3.92    1.81
  -9   0 -13    1.79    1.53
 -10   0  13    1.47    1.82
  10   0  13   -0.17    1.79
  11   0  13    0.52    1.95
 -11   0  13   -1.00    1.79
   0   0  14   13.75    1.36
   0   0  14   14.69    1.40
   0   0 -14   17.10    1.76
   1   0  14    1.20    0.97
  -1   0 -14    2.51    1.25
   1   0  14   -0.48    0.79
   1   0 -14    0.91    1.15
  -1   0  14   -0.52    0.97
   2   0  14    2.58    0.94
  -2   0  14    3.56    1.19
  -2   0 -14    1.38    1.18
   2   0 -14    3.90    1.32
   3   0 -14    0.51    1.29
  -3   0  14   -0.55    1.11
  -3   0 -14    0.36    1.25
   3   0  14    0.35    0.88
   4   0 -14   59.58    2.92
  -4   0  14   62.57    2.98
  -4   0 -14   61.45    3.11
   4   0  14   64.90    2.83
  -5   0 -14    0.71    1.47
   5   0 -14   -0.36    1.09
  -5   0  14    1.40    1.46
   5   0  14   -0.91    1.02
   6   0  14   10.19    1.62
  -6   0  14   12.50    1.83
  -6   0 -14   10.68    1.86
   6   0 -14   10.62    1.44
  -7   0 -14   -2.19    1.27
  -7   0  14    1.25    1.55
   7   0  14    0.76    1.37
  -8   0 -14    0.26    1.55
  -8   0  14   -1.72    1.46
   8   0  14   -1.00    1.50
  -9   0 -14   -0.23    1.52
   9   0  14   -1.02    1.69
  -9   0  14   -0.90    1.65
 -10   0  14   11.22    2.33
  10   0  14   14.47    2.25
  11   0  14   -0.88    1.69
 -11   0  14    1.45    2.03
   0   0  15    1.70    1.14
   0   0 -15    0.60    1.33
   1   0 -15    2.92    1.31
  -1   0  15    4.90    1.22
  -1   0 -15    5.10    1.40
   2   0 -15   -1.21    1.23
   2   0  15   -0.41    0.83
  -2   0 -15    1.12    1.33
  -2   0  15   -1.07    1.01
  -3   0 -15    5.45    1.53
  -3   0  15   11.11    1.64
   3   0 -15    7.08    1.63
   3   0  15    7.54    1.23
   4   0 -15    2.74    1.40
  -4   0 -15    3.05    1.43
   4   0  15   -0.78    0.96
  -4   0  15    0.59    1.22
   5   0 -15    9.10    1.61
   5   0  15    9.22    1.46
  -5   0 -15   10.02    1.80
  -5   0  15    9.80    1.88
   6   0 -15   -1.09    1.20
  -6   0  15    0.85    1.47
  -6   0 -15   -1.71    1.45
   6   0  15   -0.34    1.21
   7   0  15    0.41    1.44
  -7   0 -15   -3.45    1.46
  -7   0  15   -0.47    1.51
  -8   0 -15    0.04    1.59
  -8   0  15   -0.98    1.76
   8   0  15    1.49    1.66
   9   0  15   12.33    2.24
  -9   0  15   13.96    2.35
  -9   0 -15   11.39    2.09
  10   0  15    0.94    1.89
 -10   0  15    0.17    2.08
  11   0  15   -0.18    1.82
   0   0 -16    2.67    1.37
  -1   0 -16    0.47    1.42
  -1   0  16   -1.46    1.04
   1   0 -16    0.15    1.30
  -2   0  16    6.15    1.42
   2   0 -16    2.63    1.38
  -2   0 -16    2.49    1.39
  -3   0  16    0.64    1.33
   3   0 -16   -1.29    1.22
  -3   0 -16    0.80    1.40
  -4   0  16   17.00    1.97
   4   0  16   17.04    1.84
   4   0 -16   15.21    2.00
  -4   0 -16   18.17    2.16
  -5   0  16   -1.09    1.43
  -5   0 -16   -2.21    1.57
   5   0 -16   -0.89    1.30
   5   0  16   -0.38    1.08
  -6   0 -16    5.58    1.74
   6   0  16    5.42    1.46
  -6   0  16    2.63    1.63
   6   0 -16    6.39    1.57
  -7   0 -16   -0.92    1.60
  -7   0  16    0.26    1.64
   7   0  16   -0.14    1.26
   8   0  16   23.34    2.38
  -8   0  16   21.23    2.67
  -8   0 -16   24.61    2.61
   9   0  16   -1.12    1.74
  -9   0  16   -0.79    2.01
  -9   0 -16   -0.14    1.79
  10   0  16   11.99    2.37
   0   0 -17    0.05    1.35
  -1   0 -17   17.95    2.07
   1   0 -17   15.79    2.00
  -2   0  17   -1.18    1.19
   2   0 -17   -0.51    1.38
  -2   0 -17    1.37    1.43
  -3   0  17    3.44    1.49
  -3   0 -17    1.35    1.52
   3   0 -17    1.98    1.53
   4   0 -17   -1.09    1.48
  -4   0  17   -0.03    1.47
  -4   0 -17   -3.03    1.56
  -5   0  17   -0.83    1.51
  -5   0 -17   -1.10    1.52
   5   0 -17    1.17    1.48
  -6   0  17   -2.73    1.60
  -6   0 -17    2.75    1.86
   7   0  17   -0.06    1.46
  -7   0  17   -1.79    1.61
  -7   0 -17   -1.43    1.79
   8   0  17    1.24    1.70
  -8   0  17   -1.75    1.78
  -8   0 -17    0.04    1.85
   9   0  17    6.05    1.93
  -9   0  17    6.16    2.23
  -9   0 -17   11.56    2.12
  10   0  17   -0.17    2.07
  -1   0 -18    1.34    1.53
   1   0 -18    0.07    1.50
   2   0 -18   12.39    2.06
  -2   0 -18   11.09    2.09
  -3   0  18   -0.19    1.47
  -3   0 -18   -0.88    1.51
   3   0 -18   -3.28    1.36
   4   0 -18   -1.08    1.50
  -4   0  18    0.49    1.57
  -4   0 -18    0.06    1.62
   5   0 -18    1.93    1.56
  -5   0 -18   -1.31    1.74
  -5   0  18   -2.56    1.62
  -6   0 -18    8.82    2.06
  -6   0  18    5.60    2.05
  -7   0  18    1.72    1.94
  -7   0 -18   -0.35    1.74
  -8   0  18   15.72    2.64
  -8   0 -18   13.30    2.47
  -9   0 -18    1.83    1.76
   0   0 -19    1.63    1.69
  -1   0 -19   -1.86    1.74
   1   0 -19    3.05    1.71
   2   0 -19   -0.44    1.65
  -2   0 -19    0.70    1.74
   3   0 -19   -2.23    1.66
  -3   0 -19    0.00    1.68
  -4   0  19   -1.12    1.62
   4   0 -19    0.47    1.55
  -4   0 -19   -0.21    1.84
  -5   0 -19    0.03    1.93
  -5   0  19   -0.77    1.77
   5   0 -19   -0.68    1.56
  -6   0 -19   -1.29    1.79
  -6   0  19   -1.52    1.93
  -7   0  19   -0.88    2.02
  -7   0 -19   -1.60    1.96
   0   0 -20   59.05    3.63
  -1   0 -20    1.56    1.70
   1   0 -20   -1.36    1.64
   2   0 -20    0.79    1.84
  -2   0 -20    2.16    1.82
  -3   0 -20    2.22    1.81
   3   0 -20    0.10    1.68
   4   0 -20    0.30    1.77
  -4   0 -20   -4.10    1.62
   5   0 -20    0.50    1.67
  -5   0 -20    1.47    1.89
  -5   0  20    2.78    1.96
  -6   0  20    8.21    2.28
   0   0 -21   -0.04    1.98
   1   0 -21    0.95    1.77
  -1   0 -21   -1.85    1.86
   2   0 -21    1.46    1.78
  -2   0 -21   -0.25    1.83
   3   0 -21   -1.36    1.83
  -3   0 -21   -2.39    1.74
   4   0 -21   -3.12    1.75
  -1   1   0   -0.60    0.17
  -1   1   0   -0.81    0.20
  -1  -1   0   -0.58    0.21
   1   1   0   -0.63    0.20
   1   1   0   -0.53    0.20
   1  -1   0   -0.59    0.20
   2   1   0  216.31    4.13
  -2  -1   0  223.35    4.12
   2  -1   0  220.39    4.12
  -2   1   0  223.69    4.00
  -2  -1   0  219.33    3.71
  -2   1   0  217.05    3.97
   3  -1   0   -0.29    0.54
  -3   1   0    0.28    0.44
  -3   1   0   -0.48    0.46
  -3  -1   0   -0.11    0.31
  -3  -1   0    0.37    0.53
   3   1   0    0.58    0.56
  -4   1   0    0.21    0.52
  -4  -1   0   -0.53    0.38
  -4   1   0   -1.00    0.51
   4  -1   0   -1.00    0.64
  -4  -1   0   -1.59    0.58
   4   1   0   -0.84    0.58
  -5  -1   0   -0.26    0.42
  -5   1   0    0.29    0.60
  -5  -1   0    0.17    0.65
   5   1   0    0.61    0.70
   5  -1   0   -0.22    0.66
  -5   1   0    0.27    0.52
  -6   1   0    3.15    0.83
   6  -1   0    4.80    0.94
  -6   1   0    5.20    0.70
  -6  -1   0    3.55    0.84
   6   1   0    3.88    0.92
  -6  -1   0    3.81    0.56
  -7  -1   0   -1.03    0.53
   7  -1   0   -0.27    0.91
  -7   1   0    0.22    0.67
   7   1   0    3.34    1.03
  -7  -1   0    0.62    0.85
  -7   1   0    2.36    0.93
   8   1   0   23.39    1.77
  -8  -1   0   25.63    1.79
   8  -1   0   23.99    1.82
  -8   1   0   23.14    1.68
  -8   1   0   26.32    1.38
   9   1   0   -0.53    1.03
   9  -1   0   -1.67    1.07
  -9   1   0    0.44    1.02
  -9  -1   0    1.82    1.25
 -10   1   0   12.81    1.57
 -10  -1   0   14.05    1.71
  10  -1   0   14.61    1.80
  10   1   0    9.84    1.61
  11   1   0    0.48    1.36
 -11  -1   0   -1.50    1.31
 -11   1   0    0.93    1.22
  11  -1   0   -0.22    1.32
  12  -1   0   -0.25    1.57
  12   1   0    0.89    1.65
 -12   1   0   -0.28    1.25
 -12  -1   0   -1.24    1.43
 -13  -1   0    2.15    1.67
  13  -1   0    0.50    1.60
  13   1   0    1.26    1.70
 -13   1   0   -0.74    1.48
  14   1   0   -2.75    1.61
 -14  -1   0    0.65    1.79
  14  -1   0    1.15    1.96
   0   1  -1   -0.81    0.14
   0   1  -1   -0.77    0.14
   0  -1  -1   -1.00    0.13
   0   1   1   -0.98    0.14
  -1  -1   1  340.51    5.53
   1   1   1  317.73    5.46
   1   1   1  339.32    5.53
   1  -1  -1  283.18    5.32
  -1   1  -1  319.28    5.48
   1  -1   1  327.12    5.55
   1   1  -1  328.23    5.53
  -1  -1  -1  305.72    5.33
  -1   1   1  336.89    5.51
  -1   1   1  300.74    5.43
   2   1   1    0.44    0.43
   2  -1  -1   -0.09    0.38
  -2   1  -1    0.06    0.33
  -2  -1   1    0.22    0.22
   2   1   1   -0.13    0.35
  -2   1  -1   -0.16    0.35
  -2  -1   1    0.40    0.43
  -2   1   1    0.04    0.38
  -2  -1  -1   -0.18    0.36
  -2   1   1    0.44    0.36
  -2  -1  -1   -0.27    0.27
   2  -1   1   -0.65    0.41
   2   1  -1   -0.34    0.38
   2   1  -1   -0.29    0.20
  -3   1  -1   19.13    0.88
   3  -1  -1   16.97    0.92
  -3  -1   1   17.98    0.63
   3   1   1   19.00    1.01
  -3   1  -1   18.74    0.83
  -3  -1   1   16.73    0.95
   3   1  -1   18.91    0.96
  -3  -1  -1   17.16    0.70
  -3  -1  -1   17.10    0.89
  -3   1   1   17.01    0.79
   3  -1   1   17.72    0.98
  -3   1   1   17.50    0.90
   4   1   1    2.24    0.70
  -4   1  -1    2.39    0.56
   4  -1  -1    1.57    0.63
  -4  -1   1    2.21    0.42
  -4   1  -1    1.73    0.58
  -4  -1   1    1.62    0.68
  -4   1   1    2.01    0.53
   4  -1   1    1.25    0.71
   4   1  -1    1.50    0.64
  -4  -1  -1    1.92    0.63
  -4  -1  -1    1.60    0.48
  -4   1   1    2.61    0.72
  -5  -1   1    1.80    0.72
   5   1   1    2.31    0.75
  -5   1  -1    1.78    0.67
  -5   1  -1    1.66    0.60
  -5  -1   1    1.51    0.45
   5  -1  -1    1.49    0.73
  -5   1   1    1.36    0.54
  -5  -1  -1    1.34    0.47
  -5   1   1    2.34    0.78
   5  -1   1    3.46    0.81
  -5  -1  -1    2.41    0.68
   5   1  -1    1.48    0.69
  -6  -1   1    1.55    0.79
   6  -1  -1    2.27    0.80
  -6  -1   1    1.40    0.50
   6   1   1    1.74    0.82
  -6   1  -1    2.42    0.65
  -6   1  -1    1.64    0.75
   6   1  -1    2.30    0.79
  -6   1   1    1.01    0.77
   6  -1   1    1.99    0.82
  -6  -1  -1    3.69    0.81
  -6  -1  -1    0.74    0.54
  -6   1   1    1.69    0.58
  -7  -1   1  116.90    3.51
  -7   1  -1  118.57    3.33
   7   1   1  115.89    3.64
   7  -1  -1  120.28    3.59
  -7   1  -1  117.66    3.03
  -7  -1   1  116.79    2.71
   7   1  -1  113.87    3.54
  -7  -1  -1  114.73    2.79
  -7  -1  -1  114.91    3.40
  -7   1   1  118.94    2.96
  -7   1   1  119.82    3.48
   7  -1   1  122.23    3.69
   8  -1  -1    1.11    0.94
  -8  -1   1   -0.17    1.05
  -8   1  -1    0.94    0.71
  -8   1  -1   -0.09    0.86
   8   1   1   -0.15    0.98
  -8   1   1    1.32    0.96
   8   1  -1    0.95    0.97
  -8   1   1    0.36    0.70
  -8  -1  -1    2.12    1.07
   8  -1   1   -1.33    0.87
  -8  -1  -1    1.08    0.64
   9  -1  -1   45.66    2.48
  -9  -1   1   46.58    2.41
   9   1   1   47.03    2.50
  -9   1  -1   43.16    2.25
  -9  -1  -1   43.40    2.32
  -9   1   1   47.66    2.39
   9  -1   1   40.46    2.41
   9   1  -1   41.75    2.39
 -10  -1   1    0.41    1.29
 -10   1  -1    1.71    1.12
  10   1   1   -0.57    1.19
  10  -1  -1    3.71    1.42
  10   1  -1    1.04    1.23
  10  -1   1    1.56    1.30
 -10  -1  -1    2.31    1.17
 -10   1   1   -0.34    1.11
 -11  -1   1   -1.23    1.24
 -11   1  -1    0.82    1.12
  11   1   1    1.96    1.43
  11  -1  -1   -1.24    1.43
  11   1  -1   -0.69    1.31
  11  -1   1   -0.11    1.24
 -11  -1  -1    0.56    1.24
 -11   1   1    0.63    1.39
 -12  -1   1   -0.23    1.54
  12  -1  -1   -0.77    1.53
 -12   1  -1    0.60    1.27
  12   1   1   -0.23    1.52
  12  -1   1   -0.20    1.46
 -12  -1  -1   -2.29    1.18
 -12   1   1    0.77    1.45
  12   1  -1   -1.53    1.53
  13  -1  -1   13.33    2.12
 -13  -1   1   12.07    2.04
  13   1   1   10.54    2.05
  13  -1   1   10.17    2.22
 -13   1   1   10.03    1.93
 -13  -1  -1   13.29    2.03
  13   1  -1   11.82    2.15
  14   1   1   -0.83    1.69
  14  -1  -1    1.53    1.78
 -14  -1   1    0.04    1.87
  14  -1   1   -3.55    1.79
  14   1  -1    0.01    1.87
   0  -1   2    0.11    0.19
   0   1   2   -0.02    0.28
   0   1  -2   -0.11    0.25
   0  -1  -2    0.02    0.26
   0   1  -2   -0.20    0.26
   1   1   2   -0.79    0.33
  -1  -1   2   -0.95    0.34
   1   1   2   -1.17    0.29
  -1   1  -2   -0.97    0.33
   1  -1  -2   -1.09    0.30
   1  -1  -2   -0.76    0.21
   1  -1   2   -0.78    0.33
  -1   1   2   -0.89    0.32
   1   1  -2   -0.88    0.28
  -1  -1  -2   -1.14    0.31
   1   1  -2   -1.41    0.31
  -2   1  -2   -0.10    0.31
   2  -1  -2    0.07    0.39
   2  -1  -2   -0.49    0.39
  -2   1  -2    0.26    0.44
   2   1   2   -0.38    0.43
  -2  -1   2   -0.74    0.48
   2   1   2   -0.51    0.47
   2  -1   2   -1.00    0.48
  -2  -1  -2   -0.34    0.42
  -2   1   2   -1.39    0.38
  -2   1   2    0.08    0.47
   2   1  -2   -0.76    0.31
   2   1  -2   -0.21    0.41
  -3   1  -2    3.34    0.60
  -3   1  -2    3.00    0.51
   3  -1  -2    3.36    0.57
   3   1   2    3.44    0.68
  -3  -1   2    3.51    0.67
   3   1   2    3.79    0.60
  -3   1   2    2.91    0.51
   3  -1   2    2.64    0.67
  -3  -1  -2    3.72    0.53
  -3  -1  -2    3.13    0.59
   3   1  -2    3.54    0.65
  -3   1   2    3.24    0.65
   3   1  -2    3.11    0.40
   4   1   2   13.31    1.01
  -4   1  -2   10.36    0.77
   4  -1  -2   13.36    0.89
  -4  -1   2   11.39    0.62
  -4  -1   2   10.91    0.96
  -4   1  -2   11.90    0.84
   4   1  -2   13.21    0.61
   4   1  -2   11.74    0.91
  -4  -1  -2   12.42    0.79
   4  -1   2   11.28    1.04
  -4   1   2   12.29    0.79
  -4   1   2   11.31    0.93
  -4  -1  -2   10.90    0.87
   5  -1  -2    1.83    0.69
  -5  -1   2    0.50    0.43
  -5  -1   2    1.34    0.74
  -5   1  -2    0.43    0.58
  -5   1  -2   -0.08    0.58
   5   1   2    0.76    0.75
  -5  -1  -2    1.18    0.51
  -5  -1  -2    0.02    0.59
  -5   1   2    0.62    0.54
  -5   1   2    0.19    0.70
   5  -1   2    0.61    0.74
   5   1  -2    1.10    0.67
   6  -1  -2    9.47    1.01
  -6  -1   2   11.55    0.74
   6   1   2    9.95    1.12
  -6  -1   2   10.90    1.17
  -6   1  -2   12.46    0.96
  -6   1  -2   13.33    1.02
  -6   1   2   12.59    0.92
  -6  -1  -2    9.89    0.80
  -6  -1  -2   13.95    1.10
   6   1  -2   10.74    1.08
   6  -1   2   11.69    1.21
  -6   1   2    9.43    1.10
  -7  -1   2    1.31    0.56
  -7   1  -2    1.13    0.76
  -7   1  -2    1.35    0.72
   7  -1  -2    0.41    0.78
  -7  -1   2    1.42    0.99
   7   1   2    2.29    0.93
   7  -1   2    1.88    0.95
  -7  -1  -2    2.67    0.92
   7   1  -2    1.06    0.82
  -7  -1  -2    2.28    0.65
  -7   1   2    0.92    0.64
  -7   1   2    1.69    0.92
   8  -1  -2   17.16    1.46
   8   1   2   12.28    1.46
  -8   1  -2   12.66    1.13
  -8   1  -2   12.51    1.23
  -8  -1   2   14.60    1.50
   8   1  -2   16.09    1.52
  -8  -1  -2   15.79    1.08
  -8  -1  -2   12.95    1.32
  -8   1   2   13.51    1.06
  -8   1   2   17.37    1.58
   8  -1   2   15.32    1.62
  -9   1  -2    3.82    1.08
  -9   1  -2    2.15    1.00
   9  -1  -2    2.89    1.15
  -9  -1   2    1.35    1.32
   9   1   2    3.93    1.27
   9  -1   2    2.14    1.30
  -9   1   2    0.76    1.15
   9   1  -2    1.27    1.12
  -9  -1  -2    2.29    1.02
 -10   1  -2    3.99    1.18
 -10  -1   2    3.54    1.40
  10   1   2    6.33    1.42
  10  -1  -2    3.42    1.31
  10  -1   2    3.42    1.41
  10   1  -2    4.33    1.36
 -10  -1  -2    3.93    1.26
 -10   1   2    2.56    1.42
  11   1   2    0.24    1.37
 -11   1  -2   -0.86    1.04
  11  -1  -2    0.71    1.43
 -11  -1   2   -2.47    1.23
  11   1  -2    2.45    1.40
 -11  -1  -2    1.82    1.24
 -11   1   2    1.33    1.42
  11  -1   2    0.26    1.42
  12  -1  -2    2.45    1.69
  12   1   2    0.51    1.68
 -12  -1   2    6.08    1.67
 -12  -1  -2    2.69    1.43
  12  -1   2    5.35    1.83
 -12   1   2    3.02    1.67
  12   1  -2    3.07    1.73
  13   1   2   -1.87    1.61
 -13  -1   2    2.06    1.87
  13  -1  -2    0.30    1.58
  13  -1   2    0.62    1.81
 -13   1   2    0.18    1.68
  13   1  -2   -0.91    1.56
 -14  -1   2    1.78    1.88
  14   1   2    1.41    1.78
  14  -1  -2    3.07    1.88
  14  -1   2    0.08    2.00
 -14   1   2    2.50    1.91
  14   1  -2    2.80    1.81
 -15  -1   2    1.85    1.99
  15  -1  -2   -3.80    1.76
   0   1   3   -0.33    0.26
   0   1  -3   -0.13    0.37
   0   1  -3    0.57    0.42
   0   1   3   -0.26    0.36
   0  -1  -3   -0.37    0.38
   0  -1   3   -0.18    0.29
   1  -1  -3   10.21    0.66
   1  -1  -3   10.38    0.46
  -1   1  -3   10.48    0.69
  -1  -1   3   10.21    0.61
   1   1   3    9.31    0.60
   1   1   3    9.97    0.59
  -1  -1  -3    9.40    0.64
   1   1  -3   10.33    0.60
   1  -1   3   10.12    0.43
  -1   1   3   10.45    0.68
   1  -1   3   10.31    0.64
   1   1  -3   10.04    0.61
  -2  -1   3    0.75    0.53
   2   1   3   -0.32    0.51
   2   1   3    0.16    0.46
   2  -1  -3   -0.83    0.47
  -2   1  -3    0.70    0.51
   2  -1  -3   -0.21    0.38
   2   1  -3   -0.22    0.47
  -2  -1  -3    0.79    0.52
   2  -1   3   -0.34    0.32
  -2   1   3   -0.05    0.51
   2  -1   3   -0.01    0.53
   2   1  -3   -0.26    0.40
  -3  -1   3  147.99    3.34
   3   1   3  142.50    3.09
  -3   1  -3  143.54    2.87
   3  -1  -3  147.58    3.08
   3  -1  -3  150.03    3.08
   3   1   3  142.53    3.31
  -3   1  -3  143.37    3.18
  -3  -1  -3  146.84    3.07
   3   1  -3  144.75    3.21
  -3   1   3  141.93    3.27
   3  -1   3  145.96    3.35
   3   1  -3  141.20    2.82
  -3   1   3  144.36    3.08
  -4  -1   3    0.60    0.66
  -4   1  -3   -0.54    0.55
   4   1   3   -0.24    0.56
   4   1   3    0.11    0.68
  -4   1  -3    0.54    0.48
   4  -1  -3   -0.53    0.49
   4  -1  -3    0.05    0.56
   4   1  -3   -0.23    0.55
  -4   1   3   -0.25    0.47
  -4   1   3    0.55    0.65
   4  -1   3    0.68    0.70
  -4  -1  -3    0.47    0.54
  -4  -1  -3   -0.60    0.54
   4   1  -3    0.22    0.38
   5  -1  -3   25.50    1.29
  -5   1  -3   25.90    1.19
  -5   1  -3   26.15    1.25
  -5  -1   3   26.92    1.48
   5   1   3   25.01    1.47
  -5   1   3   24.39    1.15
  -5  -1  -3   23.58    1.14
   5   1  -3   24.57    1.34
   5  -1   3   25.75    1.48
  -5   1   3   27.99    1.47
  -5  -1  -3   27.20    1.31
   5   1  -3   26.36    0.97
  -6  -1   3   -1.22    0.81
  -6   1  -3    0.82    0.64
   6   1   3   -0.31    0.75
  -6   1  -3    0.91    0.64
   6  -1  -3    0.73    0.73
   6   1  -3    0.80    0.40
   6  -1   3    0.69    0.83
  -6   1   3    0.68    0.56
  -6   1   3    0.38    0.81
  -6  -1  -3   -0.23    0.54
  -6  -1  -3   -0.47    0.65
   6   1  -3    0.73    0.74
  -7  -1   3   24.45    1.68
  -7   1  -3   25.10    1.38
   7   1   3   22.55    1.66
  -7   1  -3   26.65    1.41
   7  -1  -3   23.71    1.51
  -7  -1  -3   25.90    1.51
  -7   1   3   23.15    1.62
  -7   1   3   25.72    1.26
   7  -1   3   24.80    1.72
  -7  -1  -3   24.40    1.25
   7   1  -3   25.63    1.63
   7   1  -3   24.62    1.06
  -8   1  -3   -0.08    0.75
   8  -1  -3   -1.46    0.86
  -8  -1   3    1.10    1.04
  -8   1  -3   -0.09    0.77
   8   1   3    0.17    0.94
   8   1  -3    1.15    1.01
  -8   1   3    0.95    0.69
  -8  -1  -3   -0.33    0.79
  -8  -1  -3   -0.02    0.62
  -8   1   3    0.87    1.03
   8  -1   3   -0.04    1.00
   9   1   3   21.05    1.90
  -9   1  -3   22.09    1.60
  -9  -1   3   20.86    1.85
   9  -1  -3   19.35    1.72
  -9   1  -3   19.76    1.43
   9  -1   3   19.21    1.84
   9   1  -3   20.08    1.82
  -9   1   3   20.10    1.87
  -9  -1  -3   24.46    1.76
  10  -1  -3    1.08    1.16
  10   1   3    2.34    1.37
 -10   1  -3   -0.64    0.94
 -10  -1   3    0.12    1.25
  10   1  -3   -1.24    1.17
  10  -1   3    2.13    1.30
 -10  -1  -3    1.29    1.08
 -10   1   3    1.45    1.29
  11  -1  -3   19.23    1.98
 -11  -1   3   15.03    2.05
  11   1   3   18.17    2.05
 -11  -1  -3   17.16    1.75
  11  -1   3   17.56    2.10
  11   1  -3   16.14    1.94
 -11   1   3   16.80    2.05
 -12  -1   3    1.78    1.62
  12  -1  -3    1.34    1.49
  12   1   3   -0.78    1.61
  12   1  -3   -1.27    1.56
 -12  -1  -3    1.27    1.33
 -12   1   3    0.47    1.60
  12  -1   3   -1.70    1.69
  13   1   3    0.44    1.69
  13  -1  -3    3.89    1.84
 -13  -1   3    5.18    1.83
  13  -1   3    4.00    1.76
  13   1  -3    1.94    1.65
 -13   1   3    1.73    1.82
  14  -1  -3    3.38    1.80
  14   1   3    0.16    1.72
 -14  -1   3    2.07    1.84
  14   1  -3    1.35    1.75
 -14   1   3   -1.31    1.73
  14  -1   3    1.49    1.84
  15  -1  -3    1.64    1.93
 -15   1   3    2.13    1.96
   0   1  -4   -0.24    0.47
   0   1   4   -0.50    0.35
   0   1  -4   -0.22    0.50
   0   1   4   -0.57    0.44
   0  -1  -4   -0.14    0.53
   0  -1   4   -0.44    0.38
  -1   1  -4    0.56    0.54
   1  -1  -4    0.01    0.34
   1   1   4   -0.04    0.46
  -1  -1   4    0.07    0.48
   1   1   4    0.32    0.44
   1  -1  -4    0.19    0.50
   1   1  -4    0.48    0.46
   1  -1   4    0.10    0.36
  -1  -1  -4   -0.17    0.51
  -1   1   4    0.14    0.51
   1  -1   4   -0.11    0.51
   1   1  -4   -0.13    0.43
   2  -1  -4   19.18    0.77
   2   1   4   19.85    1.00
  -2   1  -4   19.57    1.02
   2  -1  -4   20.31    0.98
   2   1   4   19.75    0.92
  -2  -1   4   20.72    1.04
   2  -1   4   20.06    1.01
   2   1  -4   19.00    0.91
  -2  -1  -4   20.39    1.01
   2   1  -4   20.70    0.90
  -2   1   4   19.21    1.03
   2  -1   4   18.46    0.72
   3  -1  -4    0.36    0.55
  -3  -1   4    0.63    0.63
  -3   1  -4   -0.07    0.61
   3  -1  -4   -0.37    0.48
   3   1   4    0.33    0.50
   3   1   4   -0.53    0.59
   3  -1   4    0.58    0.43
   3   1  -4   -0.10    0.54
  -3   1   4   -0.39    0.59
  -3  -1  -4    0.56    0.56
   3   1  -4    0.24    0.47
   3  -1   4    1.33    0.65
   4  -1  -4    7.95    0.76
   4   1   4    8.03    0.77
  -4   1  -4    8.20    0.66
  -4  -1   4    8.85    0.93
  -4   1  -4    9.26    0.85
   4  -1  -4    8.88    0.77
   4   1   4    8.08    0.94
   4  -1   4    7.71    0.93
   4   1  -4    8.88    0.84
  -4   1   4    8.65    0.93
  -4  -1  -4    8.45    0.78
   4   1  -4    8.59    0.64
   5   1   4   11.97    1.17
   5  -1  -4   10.92    0.94
  -5  -1   4   10.98    1.10
  -5   1  -4   11.18    0.97
   5  -1  -4   11.77    0.85
  -5   1  -4   12.32    0.84
   5   1  -4   11.30    0.72
  -5  -1  -4   11.69    0.94
   5  -1   4   12.15    1.14
   5   1  -4    9.50    0.96
  -5  -1  -4   12.04    0.94
  -5   1   4   11.84    1.09
  -6   1  -4   45.02    1.76
  -6   1  -4   45.30    1.68
   6   1   4   42.15    2.05
  -6  -1   4   42.63    2.03
   6  -1  -4   46.14    1.62
   6  -1  -4   44.12    1.86
  -6   1   4   43.31    2.03
   6  -1   4   47.53    2.17
   6   1  -4   45.99    1.93
  -6  -1  -4   46.37    1.70
  -6   1   4   45.69    1.70
   6   1  -4   42.36    1.42
  -6  -1  -4   45.64    1.80
  -7   1  -4   -0.40    0.65
  -7   1  -4   -0.74    0.58
  -7  -1   4   -0.05    0.90
   7  -1  -4    0.08    0.79
   7   1   4   -0.58    0.95
   7  -1  -4   -0.48    0.53
   7   1  -4    0.26    0.72
   7  -1   4    1.74    1.00
  -7  -1  -4   -1.14    0.64
  -7   1   4    0.42    0.59
  -7  -1  -4    0.62    0.66
  -7   1   4    0.64    0.92
   7   1  -4    0.48    0.49
  -8   1  -4    2.87    0.89
  -8   1  -4    1.50    0.78
   8   1   4    1.15    1.01
   8  -1  -4    2.16    1.01
  -8  -1   4    2.18    1.09
   8  -1  -4    1.33    0.72
   8  -1   4    1.90    1.09
   8   1  -4    0.30    0.91
  -8  -1  -4    1.58    0.80
  -8   1   4    0.33    1.01
  -8   1   4    1.06    0.69
  -8  -1  -4   -0.01    0.86
  -9   1  -4   -0.12    0.90
  -9  -1   4    0.65    1.20
  -9   1  -4    0.04    0.86
   9  -1  -4   -0.20    1.06
   9   1   4    0.89    1.16
   9   1  -4    0.37    1.02
  -9  -1  -4   -0.48    0.93
  -9   1   4   -0.94    1.23
   9  -1   4    0.74    1.22
  10  -1  -4    1.17    1.35
  10   1   4    0.61    1.33
 -10  -1   4    3.71    1.59
 -10  -1  -4    2.89    1.12
  10  -1   4    3.69    1.44
  10   1  -4    0.60    1.19
 -10   1   4    0.84    1.28
  11  -1  -4    1.44    1.40
  11   1   4   -0.24    1.45
 -11  -1   4   -1.15    1.53
 -11   1   4   -0.66    1.48
 -11  -1  -4    1.75    1.20
  11  -1   4    0.50    1.43
  11   1  -4   -1.90    1.33
  12   1   4   16.93    2.19
 -12  -1   4   14.29    2.15
  12  -1  -4   23.87    2.33
 -12   1   4   15.37    2.10
  12  -1   4   17.14    2.30
  12   1  -4   16.88    2.18
  13   1   4   -0.71    1.66
 -13  -1   4    1.43    1.89
  13  -1  -4    0.36    1.68
  13  -1   4   -1.35    1.63
  13   1  -4    0.41    1.68
 -13   1   4    0.64    1.72
  14  -1  -4    6.41    2.01
 -14  -1   4    5.71    2.02
  14   1   4    5.93    2.19
 -14   1   4    5.60    2.05
  14   1  -4    6.63    2.13
  14  -1   4    5.32    2.04
  15  -1  -4    0.58    1.69
   0   1   5   -0.49    0.41
   0   1  -5    0.75    0.57
   0   1   5   -0.74    0.47
   0  -1   5   -0.38    0.44
   0  -1  -5    0.86    0.58
   0   1  -5    0.02    0.44
  -1  -1   5   40.34    1.36
   1   1   5   38.72    1.31
  -1   1  -5   41.70    1.48
   1   1   5   40.43    1.28
   1  -1  -5   40.56    1.43
   1  -1  -5   42.33    1.15
  -1   1   5   39.12    1.40
   1   1  -5   39.74    1.40
  -1  -1  -5   39.44    1.45
   1  -1   5   40.36    1.39
   1   1  -5   39.58    1.32
   1  -1   5   39.16    1.16
  -2  -1   5    1.11    0.64
   2   1   5    1.27    0.52
   2  -1  -5    0.10    0.43
  -2   1  -5    0.45    0.66
   2   1   5    0.16    0.59
   2  -1  -5    0.71    0.55
   2   1  -5    0.51    0.54
   2  -1   5    1.26    0.60
  -2  -1  -5    0.96    0.59
   2  -1   5    0.77    0.41
   2   1  -5    0.45    0.54
  -2   1   5    0.32    0.57
   3  -1  -5  255.69    4.91
  -3  -1   5  244.34    5.25
   3   1   5  257.79    4.98
  -3   1  -5  258.79    5.25
   3  -1  -5  255.62    5.07
   3   1   5  264.50    5.32
   3   1  -5  255.40    4.93
   3   1  -5  255.96    5.10
  -3   1   5  255.76    5.33
  -3  -1  -5  248.98    5.13
   3  -1   5  252.52    5.31
   3  -1   5  250.20    4.69
   4  -1  -5    0.24    0.56
   4   1   5    0.21    0.53
  -4  -1   5   -0.64    0.66
   4   1   5   -1.12    0.65
   4  -1  -5    0.30    0.61
  -4   1  -5    0.02    0.39
  -4   1  -5   -0.09    0.68
   4   1  -5    0.76    0.49
   4   1  -5    0.02    0.57
   4  -1   5   -0.02    0.66
  -4   1   5    0.01    0.67
  -4  -1  -5    0.46    0.62
   4  -1   5   -0.49    0.45
   5  -1  -5   36.26    1.58
   5  -1  -5   39.10    1.52
   5   1   5   38.81    1.56
  -5   1  -5   39.43    1.66
   5   1   5   40.14    1.87
  -5   1  -5   42.18    1.44
  -5  -1   5   38.41    1.85
   5   1  -5   39.25    1.36
  -5  -1  -5   37.81    1.58
   5   1  -5   35.20    1.61
  -5  -1  -5   39.07    1.54
   5  -1   5   37.83    1.88
   6   1   5    2.29    0.95
  -6  -1   5    2.91    1.02
   6  -1  -5    2.10    0.62
   6  -1  -5    2.67    0.77
  -6   1  -5    2.32    0.62
  -6   1  -5    2.23    0.77
  -6   1   5    1.48    0.86
  -6  -1  -5    2.22    0.70
   6   1  -5    0.63    0.70
   6  -1   5    2.73    0.95
   6   1  -5    2.27    0.54
  -6  -1  -5    2.15    0.76
  -7   1  -5    3.47    0.86
   7   1   5    3.44    1.06
  -7   1  -5    3.61    0.76
   7  -1  -5    4.32    0.93
  -7  -1   5    2.54    1.05
   7  -1  -5    3.30    0.70
   7   1  -5    2.77    0.89
   7  -1   5    1.50    1.02
  -7  -1  -5    1.63    0.80
  -7   1   5    4.25    1.09
   7   1  -5    3.54    0.61
  -7  -1  -5    3.32    0.82
   8  -1  -5   -0.02    0.91
  -8   1  -5    1.91    0.92
   8   1   5    3.02    1.18
  -8   1  -5    2.81    0.88
  -8  -1   5    2.39    1.17
  -8  -1  -5    0.78    0.85
  -8   1   5   -0.08    1.13
  -8  -1  -5    3.27    0.87
   8   1  -5    1.32    0.96
   8  -1   5    0.99    1.09
   9   1   5    7.00    1.45
  -9  -1   5    7.21    1.50
  -9   1  -5    8.03    1.31
   9  -1  -5    8.29    1.39
  -9   1  -5    9.06    1.23
  -9   1   5    8.76    1.53
   9  -1   5    7.58    1.49
  -9  -1  -5    5.91    1.16
   9   1  -5    8.09    1.34
  10  -1  -5   -0.04    1.23
 -10  -1   5   -0.83    1.42
  10   1   5   -0.88    1.21
 -10  -1  -5    0.46    1.03
  10   1  -5   -1.33    1.15
  10  -1   5    1.94    1.52
 -10   1   5    1.64    1.46
 -11  -1   5   33.71    2.62
  11  -1  -5   34.95    2.45
  11   1   5   31.46    2.70
  11   1  -5   27.28    2.28
 -11   1   5   27.89    2.45
  11  -1   5   32.12    2.64
  12  -1  -5    1.45    1.35
 -12  -1   5   -0.85    1.56
  12   1   5    2.00    1.84
  12   1  -5   -3.27    1.40
 -12   1   5   -2.48    1.70
  12  -1   5   -1.03    1.70
 -13  -1   5    2.45    1.83
  13   1   5   -1.95    1.69
  13  -1  -5    1.56    1.68
  13   1  -5    0.32    1.70
 -13   1   5    4.02    1.89
  13  -1   5    0.72    1.77
 -14  -1   5   -0.51    1.98
  14  -1  -5   -0.10    1.86
  14   1   5   -1.39    1.88
  14   1  -5    1.98    1.86
 -14   1   5    1.06    1.84
  14  -1   5    1.70    1.89
   0  -1   6   -0.79    0.49
   0   1   6   -0.16    0.45
   0   1  -6   -0.30    0.59
   0   1  -6   -0.52    0.50
   0  -1   6    0.02    0.55
   0  -1  -6   -0.92    0.59
   0   1   6    0.28    0.54
  -1   1  -6   -0.38    0.60
  -1  -1   6    0.86    0.57
   1   1   6    0.85    0.55
   1  -1  -6   -0.58    0.39
   1  -1  -6   -0.63    0.55
   1   1   6   -0.71    0.49
   1  -1   6    0.43    0.47
   1   1  -6   -0.15    0.49
   1  -1   6    0.47    0.59
   1   1  -6   -0.31    0.57
  -1   1   6    0.72    0.57
  -1  -1  -6   -0.22    0.60
   2  -1  -6   13.09    0.73
   2   1   6   13.45    0.93
  -2  -1   6   11.32    0.91
  -2   1  -6   11.49    0.97
   2   1   6   10.46    0.87
   2  -1  -6   11.35    0.94
   2   1  -6   12.46    0.86
   2   1  -6   11.95    0.88
   2  -1   6   10.72    0.91
   2  -1   6    9.43    0.70
  -2   1   6   11.88    0.95
  -2  -1  -6   10.80    0.94
   3  -1  -6    7.71    0.85
   3   1   6    8.74    0.94
  -3   1  -6    9.59    0.95
   3  -1  -6    9.38    0.72
   3   1   6    8.79    0.77
  -3  -1   6    7.57    0.90
   3   1  -6    9.30    0.83
  -3  -1  -6    9.58    0.91
   3   1  -6    9.47    0.84
   3  -1   6    8.17    0.64
   3  -1   6    8.66    0.93
  -3   1   6    9.02    0.94
   4  -1  -6    3.44    0.71
  -4   1  -6    3.38    0.80
   4  -1  -6    4.37    0.69
  -4  -1   6    5.28    0.89
   4   1   6    4.05    0.70
   4   1   6    4.55    0.93
  -4  -1  -6    2.94    0.79
   4  -1   6    4.98    0.61
  -4   1   6    3.66    0.87
   4   1  -6    5.06    0.70
   4  -1   6    4.46    0.89
   4   1  -6    4.50    0.75
  -5   1  -6    0.01    0.45
   5  -1  -6   -0.14    0.56
  -5   1  -6    0.59    0.74
   5   1   6    0.75    0.63
   5   1   6    0.38    0.81
   5  -1  -6    0.35    0.64
  -5  -1   6    1.77    0.87
  -5   1   6    0.10    0.77
   5   1  -6    1.01    0.69
   5  -1   6    2.30    0.87
   5   1  -6   -0.36    0.49
  -5  -1  -6    0.71    0.69
   6  -1  -6   12.63    1.08
   6   1   6   11.72    1.31
   6  -1  -6   12.83    1.03
  -6  -1   6   12.49    1.38
  -6   1  -6   11.22    0.90
  -6   1  -6   13.23    1.21
   6   1   6   10.91    1.07
   6  -1   6   13.23    1.37
   6   1  -6   12.31    1.17
  -6  -1  -6   11.67    1.09
  -6   1   6   12.01    1.31
   6   1  -6   11.87    0.86
  -6  -1  -6   12.61    1.02
   7   1   6    4.28    1.23
   7  -1  -6    4.11    0.93
  -7  -1   6    3.45    1.14
  -7   1  -6    1.72    0.86
   7  -1  -6    3.25    0.75
  -7   1  -6    3.00    0.76
   7  -1   6    3.05    1.08
   7   1  -6    2.01    0.93
  -7  -1  -6    2.12    0.88
  -7  -1  -6    2.21    0.75
  -7   1   6    3.54    1.21
   8  -1  -6    0.74    0.95
  -8   1  -6   -1.09    0.84
  -8  -1   6   -1.98    1.03
   8   1   6   -0.83    1.04
  -8   1  -6    0.13    0.77
   8   1  -6   -0.76    0.86
  -8  -1  -6   -0.32    0.78
   8  -1   6    1.36    1.15
  -8   1   6    1.65    1.17
  -8  -1  -6    0.42    0.78
   9  -1  -6   -0.18    1.07
  -9  -1   6   -0.19    1.33
   9   1   6    0.01    1.20
  -9   1  -6    0.53    0.99
   9  -1   6   -1.97    1.25
  -9   1   6    0.81    1.33
  -9  -1  -6   -0.78    0.93
   9   1  -6   -0.32    1.13
  10  -1  -6    0.23    1.23
 -10  -1   6    1.96    1.48
  10   1   6    0.00    1.29
  10  -1   6   -0.41    1.33
  10   1  -6    0.02    1.24
 -10   1   6   -2.34    1.29
  11   1   6   -0.59    1.43
 -11  -1   6    1.02    1.47
  11  -1  -6    0.57    1.39
 -11   1   6   -1.08    1.38
  11   1  -6    1.48    1.29
  11  -1   6   -0.61    1.58
 -12  -1   6    9.90    2.00
  12   1   6    5.54    1.99
  12  -1  -6    9.04    1.81
 -12   1   6    7.11    1.92
  12  -1   6   11.17    2.18
  12   1  -6    6.97    1.71
  13   1   6   -1.63    1.52
 -13  -1   6   -0.55    1.74
  13  -1  -6    1.70    1.66
  13   1  -6    1.83    1.74
  13  -1   6    0.67    1.90
 -13   1   6   -0.46    1.90
 -14  -1   6    1.33    1.99
 -14   1   6    2.17    2.18
  14  -1   6    4.47    2.27
  14   1  -6    2.68    1.90
   0   1  -7    1.13    0.66
   0   1   7    0.37    0.44
   0  -1   7    0.85    0.57
   0  -1   7   -0.39    0.48
   0  -1  -7    0.29    0.66
   0   1   7   -0.34    0.60
   0   1  -7    0.54    0.54
  -1  -1   7   19.61    1.08
   1   1   7   19.63    1.00
   1  -1  -7   21.13    1.22
  -1   1  -7   22.52    1.27
   1  -1  -7   21.81    0.95
   1   1   7   19.82    1.07
   1   1  -7   19.40    1.06
  -1   1   7   20.89    1.18
  -1  -1  -7   19.40    1.20
   1  -1   7   20.00    0.95
   1  -1   7   20.51    1.13
   1   1  -7   18.01    1.16
   2   1   7    1.29    0.60
  -2  -1   7    0.49    0.61
   2  -1  -7    1.39    0.68
  -2   1  -7    0.88    0.72
   2   1   7    0.68    0.62
   2  -1  -7    0.80    0.47
   2  -1   7    0.19    0.47
  -2   1   7    0.11    0.62
   2   1  -7    0.30    0.65
   2  -1   7   -0.12    0.65
  -2  -1  -7    0.77    0.69
   2   1  -7    1.18    0.55
   3   1   7   27.32    1.22
  -3   1  -7   27.86    1.48
   3   1   7   27.30    1.38
   3  -1  -7   25.14    1.36
   3  -1  -7   26.80    1.14
  -3  -1   7   27.89    1.45
   3  -1   7   27.28    1.43
  -3  -1  -7   25.69    1.40
   3   1  -7   29.24    1.31
   3   1  -7   26.51    1.29
   3  -1   7   24.95    1.06
  -3   1   7   26.11    1.44
  -4  -1   7   20.72    1.41
   4   1   7   19.47    1.32
   4  -1  -7   19.66    1.21
  -4   1  -7   19.02    1.31
   4   1   7   21.16    1.15
   4  -1  -7   18.70    1.06
   4  -1   7   19.66    0.98
  -4  -1  -7   18.63    1.26
   4  -1   7   19.33    1.34
   4   1  -7   21.13    1.21
  -4   1   7   19.93    1.38
   4   1  -7   20.69    1.14
   5   1   7   49.55    1.79
   5   1   7   48.66    2.12
  -5   1  -7   46.91    1.58
   5  -1  -7   47.06    1.83
   5  -1  -7   49.61    1.82
  -5   1  -7   49.30    2.06
  -5  -1   7   48.99    2.17
   5  -1   7   43.96    2.07
   5   1  -7   50.53    1.97
   5  -1   7   47.23    1.63
  -5  -1  -7   47.35    1.95
  -5   1   7   48.84    2.19
   5   1  -7   47.14    1.73
   6  -1  -7    0.53    0.64
  -6   1  -7   -0.49    0.79
   6   1   7   -1.10    0.61
   6  -1  -7   -0.10    0.60
  -6   1  -7    0.77    0.55
  -6  -1   7   -0.12    0.86
   6   1   7    0.32    0.88
   6   1  -7    0.81    0.58
  -6  -1  -7    0.32    0.59
   6  -1   7    0.00    0.90
   6   1  -7    1.67    0.79
  -6  -1  -7   -0.58    0.75
  -6   1   7    0.10    0.91
   7  -1  -7   16.50    1.21
   7  -1  -7   15.10    1.29
  -7  -1   7   14.82    1.55
  -7   1  -7   19.43    1.48
   7   1   7   13.67    1.54
   7   1  -7   15.54    1.37
   7  -1   7   15.66    1.61
  -7   1   7   12.96    1.51
  -7  -1  -7   15.47    1.33
  -7  -1  -7   16.16    1.22
   8   1   7    2.05    1.32
   8  -1  -7   -0.33    0.91
  -8  -1   7   -1.19    1.10
  -8   1  -7    0.28    0.93
  -8  -1  -7    0.52    0.87
   8   1  -7    1.06    1.03
  -8   1   7   -0.36    1.14
  -8  -1  -7    0.73    0.98
   8  -1   7   -0.21    1.12
  -9   1  -7   24.26    1.83
   9  -1  -7   21.75    1.78
  -9  -1   7   23.50    2.08
   9   1   7   21.96    2.09
  -9   1   7   23.89    2.21
   9   1  -7   22.88    1.87
   9  -1   7   21.71    2.14
 -10  -1   7    0.19    1.43
  10   1   7    0.37    1.39
  10  -1  -7   -0.80    1.14
  10  -1   7    0.27    1.38
 -10   1   7   -2.08    1.30
  10   1  -7   -0.13    1.23
  11  -1  -7    4.25    1.47
  11   1   7    5.35    1.84
 -11  -1   7    4.40    1.71
 -11   1   7    7.50    1.81
  11   1  -7    2.48    1.48
  11  -1   7    4.06    1.75
  12   1   7    2.11    1.69
 -12  -1   7    0.88    1.75
  12  -1   7   -0.45    1.57
  12   1  -7   -0.55    1.49
 -12   1   7   -0.59    1.64
  13   1   7    2.39    2.07
 -13  -1   7    3.08    2.11
 -13   1   7   -0.09    1.85
  13  -1   7    2.93    1.93
  13   1  -7   -0.63    1.60
 -14   1   7    0.49    2.12
   0  -1   8   -0.34    0.55
   0   1  -8   -0.02    0.69
   0  -1   8   -0.21    0.55
   0   1   8    0.33    0.46
   0  -1  -8   -0.25    0.70
   0   1   8    0.72    0.65
   0   1  -8    0.05    0.60
   1  -1  -8    2.63    0.78
   1   1   8    2.97    0.60
  -1  -1   8    3.12    0.72
  -1   1  -8    3.79    0.85
   1   1   8    3.50    0.72
   1  -1  -8    2.07    0.55
   1   1  -8    2.55    0.66
  -1   1   8    2.84    0.71
  -1  -1  -8    3.76    0.84
   1   1  -8    3.19    0.79
   1  -1   8    3.11    0.71
   1  -1   8    3.15    0.60
   2   1   8   17.18    1.06
  -2   1  -8   15.80    1.24
   2  -1  -8   14.77    1.15
   2   1   8   15.58    1.05
  -2  -1   8   15.68    1.14
   2  -1  -8   16.41    0.91
  -2  -1  -8   17.35    1.26
   2  -1   8   15.17    0.89
   2  -1   8   15.85    1.11
   2   1  -8   18.16    1.21
   2   1  -8   16.54    1.01
  -2   1   8   14.01    1.11
  -3   1  -8   14.64    1.22
  -3  -1   8   12.37    1.11
   3   1   8   13.03    0.97
   3   1   8   13.95    1.13
   3  -1  -8   14.37    1.18
   3  -1  -8   12.57    0.86
  -3  -1  -8   14.05    1.20
   3  -1   8   13.60    0.85
   3   1  -8   15.34    1.12
   3  -1   8   13.05    1.18
   3   1  -8   14.31    1.01
  -3   1   8   13.50    1.17
   4  -1  -8    0.31    0.55
  -4   1  -8   -0.41    0.74
   4  -1  -8    1.13    0.76
  -4  -1   8   -0.48    0.84
   4   1   8    0.13    0.80
   4   1   8    0.82    0.63
  -4   1   8    2.56    0.88
   4   1  -8    2.43    0.73
   4  -1   8    1.54    0.88
  -4  -1  -8    1.14    0.80
   4  -1   8    1.57    0.54
   4   1  -8    0.37    0.64
   5  -1  -8    1.90    0.65
  -5   1  -8   -0.18    0.76
  -5  -1   8    1.12    0.90
   5   1   8    2.25    0.94
   5  -1  -8    0.55    0.68
   5   1   8    0.44    0.66
   5  -1   8   -0.42    0.79
   5   1  -8    0.54    0.67
  -5  -1  -8    0.40    0.85
   5   1  -8    0.55    0.68
  -5   1   8    0.53    0.87
   5  -1   8    1.90    0.59
   6   1   8    1.10    0.95
   6   1   8    1.33    0.74
   6  -1  -8    1.37    0.74
  -6  -1   8    0.62    1.02
  -6   1  -8    1.00    0.83
   6  -1  -8    2.18    0.78
   6  -1   8   -1.03    1.03
  -6  -1  -8    0.12    0.80
   6   1  -8    1.34    0.72
  -6   1   8   -0.48    0.95
   6   1  -8    2.81    0.85
  -7   1  -8    0.11    0.95
  -7  -1   8    0.20    1.09
   7   1   8    1.59    1.12
   7  -1  -8   -0.12    0.84
   7  -1  -8    0.69    0.80
  -7  -1  -8    1.33    0.97
  -7  -1  -8    0.46    0.72
  -7   1   8    0.92    1.11
   7  -1   8    0.46    1.02
   7   1  -8    1.93    0.91
  -8  -1   8    0.13    1.34
   8   1   8   -0.07    1.17
  -8   1  -8    1.57    1.10
   8  -1  -8    0.05    0.94
   8  -1   8    3.70    1.44
   8   1  -8    0.03    1.02
  -8   1   8    0.19    1.24
  -8  -1  -8    1.01    1.02
   9  -1  -8   -0.56    1.06
  -9   1  -8    1.85    1.22
   9   1   8   -1.48    1.25
  -9  -1   8   -0.13    1.33
   9  -1   8   -0.69    1.29
  -9   1   8   -0.02    1.32
   9   1  -8    0.43    1.14
  -9  -1  -8    0.52    1.03
  10   1   8   11.00    1.85
 -10  -1   8   10.85    1.91
  10  -1  -8   12.95    1.64
  10  -1   8    7.23    1.72
 -10   1   8   12.38    2.04
  10   1  -8   11.88    1.66
 -11  -1   8   -0.96    1.60
  11   1   8    0.13    1.52
  11  -1   8   -1.18    1.69
  11   1  -8   -0.29    1.32
 -11   1   8    3.24    1.75
  12   1   8    2.04    1.71
 -12  -1   8   -1.57    1.69
  12   1  -8    0.74    1.50
  12  -1   8    1.70    1.74
 -12   1   8    0.28    1.86
  13   1   8    2.01    1.90
 -13  -1   8   -0.49    1.84
 -13   1   8   -0.79    2.04
  13  -1   8    0.93    1.79
   0  -1   9    0.73    0.63
   0  -1  -9    0.40    0.78
   0   1   9    0.12    0.53
   0  -1   9    0.36    0.62
   0   1   9    0.08    0.61
   0   1  -9   -0.48    0.75
   0   1  -9   -0.48    0.59
   1   1   9  114.43    2.90
   1  -1  -9  112.29    3.27
  -1  -1   9  113.76    3.04
   1  -1  -9  112.94    2.77
   1   1   9  118.35    3.05
  -1   1  -9  111.11    3.30
  -1   1   9  119.62    2.79
  -1  -1  -9  111.88    3.32
   1   1  -9  117.72    3.32
   1  -1   9  117.77    3.10
  -1   1   9  113.55    3.16
   1  -1   9  113.38    2.85
   1   1  -9  110.75    2.96
   2   1   9    0.68    0.65
   2  -1  -9    0.12    0.51
   2   1   9   -0.13    0.58
   2  -1  -9    0.25    0.76
  -2  -1   9   -0.45    0.63
  -2   1  -9    0.69    0.82
   2   1  -9   -0.72    0.52
   2  -1   9   -0.31    0.62
  -2   1   9   -0.19    0.70
   2   1  -9    0.17    0.80
  -2  -1  -9    0.34    0.80
   2  -1   9   -0.29    0.52
   3   1   9    1.64    0.65
   3   1   9    2.31    0.80
  -3  -1   9    2.08    0.80
  -3   1  -9    2.07    0.88
   3  -1  -9    2.71    0.88
   3  -1  -9    0.47    0.53
   3   1  -9    1.64    0.77
   3   1  -9    2.30    0.69
   3  -1   9    1.60    0.85
  -3  -1  -9    1.07    0.85
   3  -1   9    2.28    0.58
  -3   1   9    0.70    0.88
   4  -1  -9    3.41    0.64
  -4  -1   9    3.28    0.98
  -4   1  -9    4.14    1.02
   4  -1  -9    2.05    0.84
   4   1   9    1.15    0.78
   4   1   9    1.45    0.67
   4   1  -9    2.73    0.80
   4   1  -9    2.74    0.72
   4  -1   9    2.52    0.62
  -4  -1  -9    4.28    1.03
   4  -1   9    2.67    0.88
  -4   1   9    1.97    0.88
  -5   1  -9   15.07    1.39
   5   1   9   15.02    1.15
   5  -1  -9   17.07    1.33
  -5  -1   9   13.37    1.40
   5   1   9   16.96    1.42
   5  -1  -9   15.85    1.14
   5  -1   9   13.94    0.98
   5   1  -9   14.14    1.19
  -5   1   9   15.03    1.44
   5   1  -9   15.20    1.17
  -5  -1  -9   14.70    1.36
   5  -1   9   13.82    1.35
   6  -1  -9    2.71    0.90
  -6  -1   9    3.79    1.18
   6   1   9    1.03    1.09
   6   1   9    2.05    0.84
  -6   1  -9    2.20    0.99
   6  -1  -9    2.90    0.83
   6   1  -9    3.67    0.90
  -6  -1  -9    0.87    1.00
  -6   1   9    3.75    1.16
   6  -1   9    4.58    1.14
   6   1  -9    1.32    0.77
  -7  -1   9   70.17    3.12
   7   1   9   70.74    2.87
   7  -1  -9   70.98    2.64
   7   1   9   71.04    3.08
   7  -1  -9   72.72    2.63
  -7   1  -9   67.73    2.81
  -7  -1  -9   70.99    2.83
   7   1  -9   72.66    2.75
   7  -1   9   66.20    3.01
  -7   1   9   66.35    3.04
   8  -1  -9    0.31    1.03
  -8   1  -9    0.56    1.09
   8   1   9    1.20    1.39
  -8  -1   9   -0.52    1.27
   8   1  -9    1.36    1.11
  -8   1   9    1.39    1.40
  -8  -1  -9    0.62    1.07
   8  -1   9    0.12    1.23
   9   1   9    9.89    1.71
  -9   1  -9    9.27    1.51
  -9  -1   9    7.26    1.69
  -9  -1  -9    7.59    1.39
  -9   1   9    7.06    1.70
   9  -1   9    7.50    1.72
   9   1  -9    7.79    1.43
  10   1   9   -2.46    1.39
 -10  -1   9    1.92    1.57
  10  -1   9    0.15    1.47
  10   1  -9   -1.21    1.24
 -10   1   9    0.25    1.51
  11   1   9    1.22    1.63
 -11  -1   9    0.10    1.75
 -11   1   9   -1.36    1.56
  11  -1   9    0.71    1.80
 -12  -1   9   -1.51    1.68
  12   1   9    2.78    1.98
 -12   1   9   -0.53    1.94
  12  -1   9   -1.49    1.61
  13   1   9    7.83    2.17
 -13  -1   9    7.57    2.23
  13  -1   9    3.76    2.07
 -13   1   9    2.36    1.99
   0  -1  10   -0.65    0.55
   0   1  10    0.92    0.73
   0  -1  10   -0.50    0.63
   0   1  10   -0.24    0.50
   0   1 -10   -1.78    0.78
   0  -1 -10   -1.03    0.84
  -1   1 -10    1.36    0.88
   1   1  10    2.42    0.75
   1   1  10    1.73    0.61
   1  -1 -10    1.21    0.54
   1  -1 -10    2.21    0.89
  -1  -1  10    1.18    0.74
  -1   1  10    1.57    0.54
  -1   1  10    2.15    0.78
   1   1 -10    2.58    0.71
   1  -1  10    2.22    0.70
   1   1 -10   -0.15    0.81
  -1  -1 -10    1.63    0.89
   1  -1  10    3.35    0.70
  -2  -1  10   48.71    2.03
  -2   1 -10   49.38    2.19
   2  -1 -10   45.71    1.63
   2  -1 -10   49.59    2.15
   2   1  10   49.84    1.91
   2   1  10   46.90    1.84
   2  -1  10   48.25    1.70
  -2  -1 -10   48.70    2.18
  -2   1  10   52.02    2.11
   2   1 -10   50.52    2.12
   2  -1  10   47.04    1.97
   2   1 -10   48.63    1.85
  -3  -1  10   -1.32    0.70
   3  -1 -10   -0.06    0.89
   3   1  10    2.01    0.73
  -3   1 -10   -0.24    0.87
   3   1  10   -0.03    0.66
   3  -1 -10    0.38    0.55
   3   1 -10    0.10    0.59
   3  -1  10   -0.51    0.69
   3  -1  10    0.01    0.54
   3   1 -10    0.83    0.88
  -3   1  10    0.22    0.79
  -3  -1 -10   -0.80    0.78
   4   1  10    1.03    0.86
  -4  -1  10    1.60    0.92
   4  -1 -10    0.01    0.58
   4  -1 -10    1.01    0.90
   4   1  10   -0.07    0.66
  -4   1 -10    0.24    0.93
   4  -1  10   -0.18    0.82
  -4  -1 -10    0.27    0.88
   4   1 -10    0.45    0.78
  -4   1  10   -0.18    0.85
   4  -1  10    1.06    0.63
   4   1 -10    1.21    0.67
   5   1  10    3.00    1.01
  -5  -1  10    3.62    1.11
   5   1  10    2.95    0.82
   5  -1 -10    3.97    1.01
   5  -1 -10    3.21    0.77
  -5   1 -10    2.48    1.03
   5   1 -10    4.35    0.96
   5  -1  10    2.72    1.02
  -5  -1 -10    3.79    1.15
  -5   1  10    4.90    1.17
   5   1 -10    2.29    0.84
  -6  -1  10    2.15    1.15
   6  -1 -10    0.39    0.87
   6   1  10    1.40    0.80
  -6   1 -10    0.54    0.99
   6   1  10    3.82    1.23
   6  -1 -10    0.14    0.76
  -6  -1 -10    1.22    1.11
   6   1 -10    0.63    0.86
  -6   1  10    2.27    1.28
   6  -1  10    2.15    1.12
   6   1 -10   -0.15    0.88
  -7   1 -10    0.03    1.03
   7   1  10    0.62    1.26
   7  -1 -10    1.93    0.93
  -7  -1  10    0.42    1.37
   7   1 -10    0.66    0.95
   7  -1  10    0.05    1.24
  -7  -1 -10    1.19    1.11
  -7   1  10    1.56    1.25
  -8   1 -10    1.55    1.27
   8   1  10    2.61    1.50
  -8  -1  10    1.83    1.46
   8  -1  10    1.80    1.45
   8   1 -10    0.92    1.16
  -8   1  10   -1.25    1.27
  -8  -1 -10    1.19    1.20
   9   1  10   -3.21    1.21
  -9  -1  10    2.64    1.56
  -9   1 -10    1.14    1.24
  -9  -1 -10   -0.93    1.14
   9   1 -10   -0.42    1.14
  -9   1  10   -1.59    1.36
   9  -1  10    1.15    1.43
 -10  -1  10    4.45    1.72
  10   1  10    8.85    1.84
 -10   1  10    4.88    1.78
  10  -1  10    4.18    1.74
  11   1  10   -2.77    1.44
 -11  -1  10   -4.65    1.56
  11  -1  10   -2.96    1.50
 -11   1  10   -2.59    1.59
 -12  -1  10    0.27    1.87
  12   1  10   -0.46    1.78
  12  -1  10    3.68    1.95
 -12   1  10    1.13    1.88
   0   1 -11    0.37    0.91
   0  -1  11    0.15    0.74
   0   1  11    0.02    0.75
   0   1  11    0.28    0.53
   0  -1  11   -0.84    0.59
   0  -1 -11   -1.26    0.83
   1   1  11   27.04    1.50
  -1  -1  11   25.01    1.47
   1   1  11   25.45    1.32
   1  -1 -11   26.88    1.73
  -1  -1  11   26.10    1.37
  -1   1 -11   23.40    1.65
   1   1 -11   28.49    1.46
  -1   1  11   25.35    1.24
  -1   1  11   24.08    1.49
  -1  -1 -11   23.32    1.65
   1  -1  11   26.34    1.37
   1   1 -11   25.40    1.67
   1  -1  11   25.08    1.43
   2  -1 -11   -0.67    0.55
  -2  -1  11    0.24    0.81
   2   1  11   -0.51    0.68
   2   1  11    0.48    0.63
   2  -1 -11    0.28    0.92
  -2   1 -11    0.17    0.89
   2   1 -11    0.09    0.66
   2  -1  11   -0.27    0.71
   2  -1  11    0.06    0.57
  -2  -1 -11   -0.07    0.88
  -2   1  11    0.17    0.85
   2   1 -11   -0.29    0.87
   3  -1 -11    9.83    1.25
   3  -1 -11   10.90    0.92
   3   1  11   11.95    1.09
  -3  -1  11   11.57    1.29
   3   1  11   11.96    1.14
  -3   1 -11   11.93    1.37
   3  -1  11   10.69    0.95
   3  -1  11    9.13    1.18
  -3  -1 -11   11.82    1.37
   3   1 -11   12.06    1.34
  -3   1  11   11.37    1.27
   3   1 -11   10.84    1.04
  -4  -1  11    7.72    1.28
   4  -1 -11    7.88    1.22
   4  -1 -11    7.95    0.89
   4   1  11    8.93    1.01
  -4   1 -11    7.71    1.37
   4   1  11    6.01    1.10
   4  -1  11    7.63    1.22
  -4   1  11    7.07    1.23
  -4  -1 -11    7.00    1.34
   4   1 -11    7.31    1.15
   4   1 -11    7.81    0.99
   5   1  11   16.01    1.55
   5  -1 -11   18.09    1.55
   5   1  11   18.25    1.34
  -5   1 -11   17.36    1.72
  -5  -1  11   18.25    1.68
   5  -1  11   18.20    1.60
  -5   1  11   18.58    1.70
   5   1 -11   19.94    1.41
  -5  -1 -11   19.69    1.74
   5   1 -11   18.74    1.47
   6  -1 -11    1.35    0.96
   6   1  11   -0.44    1.01
  -6  -1  11    2.01    1.21
  -6   1 -11   -2.03    0.96
   6   1 -11   -0.18    0.87
   6  -1  11    0.15    1.17
   6   1 -11   -0.30    0.81
  -6  -1 -11    0.90    1.17
  -6   1  11    0.17    1.15
   7   1  11   42.18    2.51
  -7   1 -11   43.58    2.47
  -7  -1  11   45.16    2.69
   7  -1 -11   48.29    2.31
  -7  -1 -11   41.91    2.38
   7  -1  11   43.14    2.64
   7   1 -11   47.91    2.32
  -7   1  11   49.62    2.78
  -8  -1  11   -1.77    1.48
  -8   1 -11    2.72    1.39
   8   1  11    0.19    1.30
  -8   1  11    0.43    1.42
   8  -1  11    1.09    1.44
  -8  -1 -11   -0.11    1.25
   9   1  11    3.74    1.70
  -9  -1  11    4.62    1.73
  -9   1 -11    5.39    1.50
  -9   1  11    3.19    1.64
   9  -1  11    2.46    1.56
  -9  -1 -11    4.52    1.41
  10   1  11   -1.57    1.45
 -10  -1  11    1.05    1.67
 -10   1 -11    1.53    1.44
 -10   1  11    0.79    1.58
  10  -1  11   -1.55    1.52
 -11  -1  11    2.20    1.86
  11   1  11    6.33    1.91
  11  -1  11   -0.67    1.73
 -11   1  11    3.84    2.09
 -12  -1  11   -0.07    1.91
  12   1  11    0.76    1.89
  12  -1  11    0.20    1.87
 -12   1  11    4.34    2.04
   0   1 -12    0.00    0.96
   0  -1 -12    1.91    1.09
   0   1  12   -0.37    0.56
   0   1  12    0.54    0.80
   0  -1  12    2.83    0.88
   0  -1  12   -0.46    0.61
   1   1  12    0.52    0.64
  -1  -1  12    0.90    0.85
   1   1  12   -0.11    0.80
   1  -1 -12    1.71    1.07
  -1  -1  12   -0.21    0.58
  -1   1 -12    1.21    1.00
   1   1 -12   -0.38    0.72
   1  -1  12   -0.62    0.70
  -1   1  12   -0.92    0.84
   1  -1  12    1.78    0.78
   1   1 -12   -0.11    0.89
  -1   1  12    0.34    0.55
  -1  -1 -12    0.99    0.97
   2  -1 -12    0.23    0.63
   2   1  12    1.04    0.83
   2  -1 -12    0.61    1.08
   2   1  12   -0.67    0.69
  -2   1 -12    0.04    0.93
  -2  -1  12   -1.23    0.81
  -2   1  12   -0.54    0.81
   2   1 -12   -0.63    0.65
   2   1 -12    0.50    1.04
  -2  -1 -12    0.05    1.00
  -2   1  12    0.53    0.52
   2  -1  12    0.26    0.78
   2  -1  12    0.70    0.69
   3   1  12    1.51    0.81
   3  -1 -12    1.27    1.02
  -3  -1  12    1.61    1.06
   3   1  12   -0.35    0.76
  -3   1 -12    1.05    1.06
  -3   1  12    3.65    1.04
   3  -1  12    0.98    0.81
  -3  -1 -12   -0.17    0.99
   3   1 -12    0.57    0.73
   3   1 -12   -0.43    0.93
  -4   1 -12    3.68    1.20
   4   1  12    1.61    0.88
  -4  -1  12    2.05    1.15
   4   1  12    1.04    0.93
   4  -1 -12    1.83    1.15
   4   1 -12    3.86    1.12
  -4  -1 -12    1.60    1.12
   4   1 -12    2.97    0.82
   4  -1  12    3.83    1.14
  -4   1  12    1.87    1.11
   5  -1 -12    1.70    1.06
   5   1  12    2.40    1.06
  -5   1 -12    1.32    1.27
  -5  -1  12   -1.68    1.05
   5   1 -12    0.63    0.84
  -5  -1 -12    0.04    1.11
  -5   1  12    1.10    1.32
   5   1 -12    1.09    1.01
   5  -1  12    1.63    1.16
  -6   1 -12    0.71    1.20
   6  -1 -12    1.57    1.03
   6   1  12   -0.61    0.98
  -6  -1  12   -0.58    1.36
   6  -1  12    0.13    1.12
   6   1 -12   -0.88    0.86
  -6   1  12   -1.53    1.13
  -6  -1 -12   -0.25    1.27
  -7   1 -12   -2.16    1.10
  -7  -1  12   -0.89    1.41
   7   1  12    0.49    1.30
   7  -1 -12   -0.74    1.01
   7  -1  12   -0.54    1.30
  -7  -1 -12    0.55    1.37
  -7   1  12   -2.46    1.23
  -8   1 -12    2.80    1.29
  -8  -1  12    0.91    1.63
   8   1  12    0.34    1.46
  -8  -1 -12    0.63    1.33
  -8   1  12    3.56    1.58
   8  -1  12    1.98    1.62
  -9   1 -12   -0.61    1.35
   9   1  12   -0.10    1.54
  -9  -1  12   -2.00    1.59
  -9  -1 -12   -0.47    1.31
  -9   1  12    1.76    1.58
   9  -1  12   -0.14    1.51
 -10  -1  12   -1.79    1.62
  10   1  12   -0.60    1.66
 -10   1 -12   -2.11    1.36
 -10   1  12    1.20    1.88
  10  -1  12    5.52    1.87
 -11  -1  12   -2.33    1.84
  11   1  12   -1.64    1.82
 -11   1  12    0.80    1.89
  11  -1  12   -0.82    1.84
  12   1  12    1.77    2.03
 -12  -1  12    2.65    2.24
 -12   1  12    1.14    1.92
  12  -1  12   -0.44    1.88
   0  -1  13    0.94    0.85
   0  -1 -13    1.43    1.13
   0   1  13   -0.36    0.67
   0   1  13   -0.39    0.84
   0  -1  13   -1.37    0.61
   0   1 -13   -0.70    1.03
  -1   1 -13    1.42    1.20
   1   1  13    0.28    0.95
   1  -1 -13   -1.23    1.02
   1   1  13    0.41    0.67
  -1  -1  13    1.03    0.77
  -1  -1  13    1.90    0.95
   1   1 -13    2.40    1.17
  -1  -1 -13   -0.77    1.05
   1  -1  13    1.80    0.84
   1  -1  13    0.40    0.84
  -1   1  13    0.35    0.99
  -2  -1  13    1.00    0.94
   2   1  13   -0.30    0.69
   2   1  13   -1.44    0.85
   2  -1 -13   -0.03    1.20
  -2   1 -13   -0.56    1.11
  -2  -1 -13    1.23    1.16
   2   1 -13    0.09    1.11
   2   1 -13   -0.41    0.73
  -2   1  13    0.82    1.07
   2  -1  13    0.69    0.82
   3   1  13   41.70    2.03
  -3  -1  13   43.51    2.28
   3  -1 -13   47.48    2.47
  -3   1 -13   43.26    2.47
   3   1  13   43.87    2.09
   3  -1  13   42.59    2.18
   3   1 -13   43.74    1.96
   3   1 -13   41.50    2.37
  -3  -1 -13   40.77    2.38
  -3   1  13   45.56    2.37
   4   1  13    1.62    0.96
  -4   1 -13    0.95    1.21
   4  -1 -13    3.78    1.33
  -4  -1  13   -0.33    1.21
   4   1 -13    0.55    1.06
  -4   1  13    3.65    1.33
   4  -1  13    2.72    1.04
  -4  -1 -13    1.31    1.30
  -5   1 -13   38.46    2.43
  -5  -1  13   45.65    2.62
   5  -1 -13   41.56    2.34
   5   1  13   45.89    2.40
  -5  -1 -13   41.63    2.51
   5  -1  13   43.47    2.38
  -5   1  13   42.46    2.61
   5   1 -13   38.03    2.21
  -6   1 -13    1.57    1.34
   6   1  13    1.35    1.15
  -6  -1  13    3.14    1.45
   6  -1 -13    0.27    1.04
  -6  -1 -13   -0.37    1.22
   6  -1  13    0.00    1.16
   6   1 -13    0.70    1.08
  -6   1  13    2.21    1.50
  -7   1 -13    0.69    1.46
  -7  -1  13    0.86    1.43
   7   1  13   -0.06    1.22
  -7   1  13    1.20    1.47
  -7  -1 -13    0.38    1.40
   7  -1  13    1.10    1.30
  -8   1 -13    1.69    1.44
  -8  -1  13    2.58    1.59
   8   1  13    0.63    1.35
  -8  -1 -13    0.56    1.43
  -8   1  13    1.32    1.72
   8  -1  13    2.15    1.47
  -9   1 -13    4.12    1.53
   9   1  13    0.04    1.64
  -9  -1  13    6.14    1.95
  -9  -1 -13    3.89    1.62
   9  -1  13    3.75    1.72
  -9   1  13    6.64    1.89
 -10   1 -13    2.61    1.58
  10   1  13   -0.42    1.54
 -10  -1  13    0.46    1.71
  10  -1  13    0.43    1.69
 -10   1  13    0.22    1.72
 -11  -1  13   18.16    2.56
  11   1  13   12.25    2.30
 -11   1  13   21.95    2.78
  11  -1  13   13.97    2.49
   0  -1  14   -1.19    0.84
   0   1  14   -0.52    0.95
   0  -1 -14    0.15    1.11
   0   1 -14    0.09    1.14
   0  -1  14   -0.02    0.75
   1  -1 -14    0.52    1.24
  -1  -1  14   -0.70    0.95
   1   1  14   -0.67    0.98
  -1   1 -14    0.33    1.14
  -1  -1  14   -0.02    0.73
   1  -1  14    1.17    0.90
   1   1 -14    0.81    1.27
  -1  -1 -14    0.32    1.16
  -1   1  14    1.51    1.05
   1  -1  14    0.59    0.96
   2   1  14    2.55    1.05
  -2   1 -14    2.27    1.25
   2   1  14    1.90    0.90
   2  -1 -14    1.58    1.35
  -2  -1  14    1.74    1.15
  -2  -1 -14    0.52    1.21
   2   1 -14    2.18    1.30
   2   1 -14    1.22    0.88
  -2   1  14    1.24    1.08
   2  -1  14    1.37    0.88
  -3   1 -14    2.17    1.36
   3   1  14   -0.90    0.78
  -3  -1  14    2.11    1.19
   3  -1 -14    1.04    1.25
  -3   1  14   -0.17    1.23
   3  -1  14    0.22    0.92
  -3  -1 -14   -2.42    1.20
   3   1 -14   -0.65    1.11
   4  -1 -14   13.99    1.77
  -4   1 -14   14.29    1.83
  -4  -1  14    8.42    1.56
   4   1  14   12.29    1.42
   4  -1  14   11.47    1.47
  -4  -1 -14   11.74    1.73
  -4   1  14   14.18    1.80
   4   1 -14   16.85    1.77
   5   1  14    0.03    0.97
   5  -1 -14    3.52    1.32
  -5  -1  14   -1.66    1.18
  -5   1 -14    1.31    1.46
   5   1 -14    1.98    1.15
  -5  -1 -14   -2.09    1.31
  -5   1  14    0.25    1.31
   5  -1  14   -0.95    1.04
   6   1  14    5.76    1.40
   6  -1 -14    8.07    1.46
  -6   1 -14    0.93    1.49
  -6  -1  14    7.80    1.77
   6   1 -14    6.44    1.33
   6  -1  14    6.96    1.48
  -6  -1 -14    6.84    1.62
  -6   1  14    5.72    1.76
  -7  -1  14    0.38    1.52
   7   1  14    1.36    1.36
  -7   1 -14   -0.62    1.48
   7  -1  14    1.49    1.39
  -7   1  14    1.93    1.58
  -7  -1 -14    2.05    1.61
  -8  -1  14    0.84    1.66
   8   1  14    0.97    1.50
  -8   1 -14   -0.95    1.55
  -8  -1 -14    0.67    1.51
  -8   1  14    0.30    1.61
   8  -1  14    0.00    1.54
  -9  -1  14   -0.94    1.64
   9   1  14   -1.85    1.42
  -9   1 -14    2.65    1.67
   9  -1  14   -0.73    1.58
  -9  -1 -14   -0.82    1.50
  -9   1  14    2.02    1.76
 -10  -1  14   -0.97    1.96
  10   1  14    1.49    1.82
 -10   1 -14   -1.73    1.62
  10  -1  14    0.32    1.84
 -10   1  14   -0.53    1.78
 -11  -1  14   -0.10    2.01
  11   1  14   -0.83    2.03
  11  -1  14    1.99    1.84
 -11   1  14   -0.10    2.11
   0  -1  15    0.93    0.93
   0   1  15   -1.02    1.00
   0   1 -15    0.24    1.19
   0  -1 -15   -1.17    1.18
   1  -1 -15    1.01    1.23
  -1  -1  15    1.66    1.13
   1   1  15    1.42    1.04
  -1   1 -15    0.23    1.21
   1   1 -15    2.30    1.32
  -1   1  15    2.38    1.20
   1  -1  15    1.37    0.93
  -1  -1 -15    3.16    1.38
  -2  -1  15    0.50    1.11
   2  -1 -15    0.02    1.37
  -2   1 -15    0.29    1.30
   2  -1  15    0.21    0.89
   2   1 -15   -1.98    1.26
  -2   1  15    1.76    1.26
  -2  -1 -15    0.73    1.26
  -3  -1  15   40.00    2.38
   3  -1 -15   42.81    2.63
  -3   1 -15   37.09    2.59
   3   1 -15   39.67    2.50
  -3  -1 -15   40.58    2.63
  -3   1  15   44.02    2.51
   3  -1  15   38.38    2.19
   4   1  15    0.38    0.97
  -4  -1  15    0.28    1.36
   4  -1 -15   -0.10    1.38
  -4   1 -15    1.24    1.53
   4  -1  15    2.03    1.12
   4   1 -15    0.12    1.21
  -4  -1 -15   -0.27    1.43
  -4   1  15   -2.09    1.30
  -5  -1  15   26.93    2.33
   5   1  15   22.82    1.88
   5  -1 -15   23.59    2.09
  -5   1 -15   22.65    2.29
  -5  -1 -15   25.99    2.28
  -5   1  15   28.22    2.34
   5   1 -15   23.15    2.01
   5  -1  15   23.80    2.01
  -6   1 -15   -0.56    1.40
  -6  -1  15   -0.53    1.54
   6  -1 -15    0.38    1.24
   6   1  15   -0.29    1.18
   6  -1  15    0.54    1.32
  -6   1  15   -2.14    1.35
  -6  -1 -15    0.09    1.43
  -7  -1  15   -0.26    1.46
   7   1  15   -0.49    1.29
  -7   1 -15    1.08    1.46
  -7  -1 -15   -0.88    1.56
   7  -1  15   -0.16    1.49
  -7   1  15   -1.03    1.67
  -8  -1  15    0.96    1.80
   8   1  15   -1.55    1.48
  -8   1 -15   -1.88    1.61
  -8  -1 -15    1.08    1.47
   8  -1  15   -3.02    1.34
  -8   1  15   -3.11    1.69
  -9  -1  15    5.87    1.94
   9   1  15   -0.04    1.58
  -9   1 -15    6.62    1.85
   9  -1  15    4.72    1.87
  -9  -1 -15    5.71    1.98
  -9   1  15    6.47    2.23
  10   1  15   -1.88    1.56
 -10  -1  15   -2.04    1.85
 -10   1 -15    0.66    1.83
  10  -1  15    0.37    1.94
 -10   1  15    0.44    2.14
  11   1  15   12.08    2.37
   0  -1 -16   -1.70    1.24
   0   1 -16   -2.77    1.27
   0   1  16   -0.01    1.08
  -1  -1  16    0.45    1.16
   1  -1 -16    1.56    1.35
  -1   1 -16    0.56    1.34
   1   1 -16    2.03    1.33
  -1  -1 -16    0.55    1.32
  -1   1  16    2.61    1.19
  -2   1 -16   -2.63    1.29
   2  -1 -16    0.85    1.34
  -2  -1  16    1.41    1.21
  -2   1  16    1.60    1.29
  -2  -1 -16   -1.96    1.17
   2   1 -16    1.68    1.43
  -3  -1  16   -0.04    1.29
  -3   1 -16   -1.28    1.25
   3  -1 -16   -2.41    1.35
   3  -1  16    0.99    1.00
   3   1 -16   -0.59    1.25
  -3   1  16    0.66    1.37
  -3  -1 -16    2.71    1.45
  -4   1 -16   -1.29    1.43
  -4  -1  16    1.41    1.36
   4  -1 -16    0.11    1.34
   4   1 -16   -0.66    1.33
  -4   1  16    0.57    1.37
   4  -1  16    0.76    1.10
  -4  -1 -16   -0.70    1.45
  -5  -1  16    0.89    1.50
   5  -1 -16   -0.97    1.39
  -5   1 -16    1.90    1.53
   5  -1  16    2.73    1.33
   5   1 -16    0.03    1.28
  -5  -1 -16    0.36    1.50
  -5   1  16    2.75    1.60
  -6   1 -16    2.39    1.67
   6   1  16   -0.13    1.22
   6  -1 -16    2.81    1.49
  -6  -1  16    2.65    1.64
  -6   1  16    0.74    1.49
  -6  -1 -16   -0.09    1.63
   6  -1  16    0.62    1.37
  -7   1 -16    1.08    1.68
  -7  -1  16    1.17    1.78
   7   1  16   -0.85    1.38
   7  -1  16   -2.11    1.29
  -7   1  16    0.77    1.67
  -7  -1 -16   -1.35    1.62
  -8   1 -16    2.10    1.71
   8   1  16   -0.26    1.53
  -8  -1  16    0.32    1.90
  -8  -1 -16   -2.98    1.60
  -8   1  16    0.97    1.79
   8  -1  16   -0.13    1.69
  -9   1 -16   -1.64    1.62
  -9  -1  16    2.35    1.97
   9   1  16   -0.21    1.75
  -9  -1 -16   -0.02    1.67
  -9   1  16    1.62    1.95
   9  -1  16   -0.30    1.68
  10   1  16    1.96    1.89
 -10   1 -16    0.90    1.92
  10  -1  16    5.04    2.13
   0  -1 -17    0.34    1.39
   0   1 -17   -0.36    1.34
   1  -1 -17    5.20    1.65
  -1   1 -17    6.66    1.62
  -1   1  17    8.13    1.51
  -1  -1 -17    9.41    1.79
   1   1 -17    5.03    1.70
  -2  -1  17    0.16    1.23
  -2   1 -17   -0.65    1.35
   2  -1 -17    1.39    1.41
   2   1 -17   -0.44    1.43
  -2  -1 -17    0.07    1.52
  -2   1  17   -0.93    1.20
   3  -1 -17    4.52    1.62
  -3  -1  17    5.27    1.52
  -3   1 -17    7.02    1.76
   3   1 -17    5.50    1.58
  -3   1  17    8.85    1.60
  -3  -1 -17    3.20    1.62
  -4  -1  17    1.31    1.39
   4  -1 -17    1.87    1.65
  -4   1 -17    0.12    1.49
  -4  -1 -17   -0.55    1.44
   4   1 -17   -0.50    1.47
  -4   1  17    3.04    1.62
   5  -1 -17    8.49    1.82
  -5  -1  17    8.02    1.74
  -5   1 -17    6.34    1.90
  -5   1  17    4.31    1.84
   5   1 -17    7.03    1.59
   5  -1  17    2.24    1.40
  -5  -1 -17    7.60    1.93
  -6  -1  17   -1.83    1.41
  -6   1 -17    0.45    1.81
   6  -1 -17   -0.03    1.46
   6  -1  17   -1.02    1.35
  -6  -1 -17    1.23    1.61
  -6   1  17   -1.76    1.64
  -7   1 -17   15.47    2.37
  -7  -1  17   17.83    2.52
  -7   1  17   18.85    2.55
   7  -1  17   18.56    2.23
  -7  -1 -17   13.01    2.32
  -8  -1  17    0.02    2.00
  -8   1 -17    0.68    1.79
  -8  -1 -17    0.81    1.88
  -8   1  17    2.29    2.14
   8  -1  17    0.35    1.66
  -9  -1  17    7.63    2.49
   9   1  17    5.60    2.11
  -9   1 -17    7.33    2.25
  -9  -1 -17   10.68    2.37
  -9   1  17    7.94    2.49
   9  -1  17    6.45    2.15
  10   1  17    0.76    1.81
 -10   1 -17    2.09    2.08
   0  -1 -18    2.13    1.73
   0   1 -18    1.24    1.64
  -1   1 -18   -1.48    1.44
   1  -1 -18    0.22    1.44
  -1  -1 -18   -1.85    1.52
   1   1 -18   -2.83    1.35
   2  -1 -18    2.71    1.71
  -2   1 -18    0.83    1.53
  -2   1  18    1.07    1.45
   2   1 -18    3.57    1.73
  -2  -1 -18    1.79    1.56
   3  -1 -18    0.62    1.48
  -3   1 -18   -0.89    1.71
  -3  -1  18    1.04    1.48
   3   1 -18   -0.94    1.54
  -3  -1 -18   -0.63    1.63
  -3   1  18    1.72    1.54
   4  -1 -18   -1.26    1.48
  -4   1 -18   -0.41    1.58
  -4  -1  18   -0.88    1.44
  -4   1  18   -2.21    1.32
  -4  -1 -18    0.07    1.58
   4   1 -18    0.60    1.58
   5  -1 -18   -1.11    1.46
  -5   1 -18    1.35    1.84
  -5  -1  18   -1.72    1.45
  -5  -1 -18   -4.83    1.61
   5   1 -18   -1.94    1.43
  -5   1  18   -1.07    1.51
  -6   1 -18   -3.20    1.57
  -6  -1  18    0.53    1.61
   6  -1 -18   -1.95    1.63
  -6   1  18    2.30    1.76
  -6  -1 -18   -1.05    1.63
  -7  -1  18    0.10    1.97
  -7   1 -18    1.07    1.78
  -7   1  18    2.32    1.83
  -7  -1 -18   -0.97    1.93
  -8   1 -18   -0.61    1.85
  -8  -1  18    0.83    2.21
  -8   1  18    3.26    2.02
   8  -1  18    2.97    2.12
  -8  -1 -18    2.82    1.92
  -9   1 -18    4.22    2.44
   9  -1  18    0.66    1.91
  -9  -1 -18    1.09    2.10
   0   1 -19    0.73    1.59
   0  -1 -19   -0.10    1.75
  -1   1 -19   29.62    2.69
   1   1 -19   31.54    2.70
  -1  -1 -19   29.41    2.70
  -2   1 -19    0.10    1.66
   2  -1 -19   -2.50    1.48
  -2  -1 -19    1.07    1.64
   2   1 -19    0.47    1.69
  -3   1 -19    0.33    1.70
   3  -1 -19   -1.44    1.63
  -3   1  19   -1.12    1.52
  -3  -1 -19    1.64    1.76
   3   1 -19   -0.26    1.63
   4  -1 -19    3.31    1.68
  -4   1 -19    1.27    1.96
   4   1 -19    0.98    1.64
  -4   1  19   -0.11    1.62
  -4  -1 -19    0.82    1.85
  -5   1 -19   -0.25    1.81
  -5  -1  19   -0.19    1.81
   5  -1 -19    2.05    1.71
  -5   1  19    0.87    1.80
  -5  -1 -19   -0.31    1.76
   5   1 -19    0.89    1.63
  -6  -1  19   -4.08    1.73
  -6   1 -19    0.50    1.81
  -6   1  19    0.73    1.98
  -6  -1 -19   -0.46    1.97
  -7  -1  19   11.14    2.40
  -7   1 -19   10.03    2.45
  -7  -1 -19    6.89    2.37
  -7   1  19   13.20    2.58
   0   1 -20   -3.87    1.70
   0  -1 -20   -1.08    1.78
   1  -1 -20   -3.47    1.70
  -1   1 -20    1.99    1.94
  -1  -1 -20   -0.58    1.70
   1   1 -20    1.82    1.85
   2  -1 -20   -1.04    1.65
  -2   1 -20    0.96    1.73
  -2  -1 -20    0.11    1.86
   2   1 -20    1.29    1.75
   3  -1 -20   -1.09    1.79
  -3   1 -20   -1.28    1.67
  -3  -1 -20   -1.89    1.68
   3   1 -20   -1.55    1.73
   4  -1 -20   -1.75    1.60
  -4   1 -20   -3.73    1.64
  -4   1  20   -0.68    1.61
  -4  -1 -20   -1.06    1.97
   4   1 -20   -1.60    1.65
  -5   1 -20   -0.77    1.81
   5  -1 -20   -0.06    1.77
  -5  -1 -20   -4.37    1.93
  -5   1  20    0.47    1.82
  -6  -1  20   -1.33    1.93
  -6   1  20    0.06    1.96
  -6  -1 -20    1.53    2.24
  -7  -1  20    0.94    2.18
   0   1 -21    0.91    1.78
   0  -1 -21   -0.14    1.87
   1  -1 -21    1.70    1.82
  -1   1 -21    5.63    2.01
  -1  -1 -21    4.45    2.16
   1   1 -21    1.41    1.86
   2  -1 -21    1.84    1.95
  -2   1 -21   -2.64    1.67
  -2  -1 -21    1.43    1.87
   2   1 -21    0.59    1.91
   3  -1 -21    3.69    1.94
  -3   1 -21    1.64    1.95
  -3  -1 -21    7.04    2.21
   3   1 -21    5.27    1.92
   4  -1 -21   -0.17    1.90
   4   1 -21    1.57    1.88
   5  -1 -21    3.93    1.95
   0   2   0   48.31    1.03
   1   2   0   -0.18    0.29
  -1   2   0   -0.44    0.23
   1  -2   0   -0.28    0.24
   1   2   0    0.44    0.31
  -1   2   0    0.09    0.30
   2   2   0  454.19    8.07
   2  -2   0  460.76    8.01
   2   2   0  466.65    8.08
  -2  -2   0  460.44    8.05
  -2   2   0  456.27    7.96
  -2   2   0  471.24    7.87
   3   2   0   -0.38    0.54
  -3  -2   0    0.00    0.25
  -3  -2   0    0.24    0.56
   3  -2   0    0.59    0.59
  -3   2   0   -0.28    0.52
  -3   2   0   -0.10    0.50
  -4   2   0   14.18    0.90
  -4  -2   0   15.76    0.60
  -4  -2   0   15.15    1.03
   4   2   0   13.70    0.99
  -4   2   0   14.84    0.91
   4  -2   0   14.46    1.01
  -5  -2   0   -0.31    0.38
   5  -2   0    1.39    0.73
   5   2   0   -0.61    0.64
  -5   2   0   -0.95    0.59
  -5  -2   0   -1.16    0.62
  -5   2   0   -0.08    0.63
  -6  -2   0    1.77    0.79
   6  -2   0    2.17    0.89
  -6   2   0    1.80    0.72
  -6   2   0    3.21    0.69
   6   2   0    0.91    0.79
  -6  -2   0    2.42    0.47
  -7   2   0    0.05    0.78
   7   2   0    1.66    0.96
  -7   2   0   -0.07    0.66
   7  -2   0   -1.80    0.77
  -7  -2   0    0.06    0.93
  -7  -2   0   -0.63    0.46
  -8  -2   0   91.58    3.22
  -8   2   0   93.58    3.10
   8  -2   0   87.85    3.25
   8   2   0   90.81    3.33
  -8   2   0   95.47    2.80
   9   2   0    1.44    1.10
   9  -2   0    0.50    1.14
  -9   2   0   -0.54    0.93
  -9   2   0    1.57    0.85
  -9  -2   0   -1.11    1.04
 -10  -2   0    8.72    1.50
  10   2   0   10.47    1.63
  10  -2   0   11.29    1.67
 -10   2   0    8.98    1.45
 -11   2   0    0.13    1.16
  11   2   0    0.81    1.37
 -11  -2   0    0.37    1.26
  11  -2   0    0.96    1.36
 -12  -2   0    9.15    1.95
  12   2   0    9.15    2.02
 -12   2   0   11.17    1.73
  12  -2   0    9.52    1.92
  13  -2   0   -0.05    1.75
 -13  -2   0   -0.90    1.69
  13   2   0   -0.97    1.55
 -14  -2   0   11.44    2.22
  14   2   0   11.94    2.46
  14  -2   0   16.01    2.50
   0   2  -1    0.51    0.25
   0   2   1    0.08    0.23
   0   2  -1    0.52    0.19
   0   2   1    0.27    0.25
   0   2  -1    0.58    0.26
   0  -2  -1    0.59    0.24
   1   2   1   27.45    0.87
   1   2   1   27.43    0.81
  -1   2  -1   27.44    0.86
   1  -2  -1   27.07    0.67
  -1  -2   1   29.51    0.85
  -1   2   1   26.59    0.85
  -1  -2  -1   27.93    0.70
   1   2  -1   24.63    0.62
  -1   2   1   28.86    0.84
   1  -2   1   27.29    0.85
   2   2   1   -0.04    0.48
   2   2   1    0.76    0.47
   2  -2  -1    0.35    0.39
  -2   2  -1   -0.10    0.47
  -2   2  -1    0.41    0.34
  -2  -2   1    0.53    0.47
   2   2  -1   -0.11    0.44
  -2  -2  -1    0.08    0.28
  -2   2   1    0.78    0.42
  -2   2   1    0.38    0.45
   2  -2   1   -0.07    0.45
   3   2   1   19.10    0.99
   3   2   1   18.59    1.02
  -3  -2   1   18.58    1.02
   3  -2  -1   19.42    0.96
  -3   2  -1   18.75    0.83
  -3   2  -1   20.21    0.96
  -3   2   1   18.64    0.91
  -3  -2  -1   19.43    0.68
  -3   2   1   19.54    0.92
  -3  -2  -1   20.52    0.99
   3  -2   1   19.69    1.03
   3   2  -1   18.90    1.00
  -4   2  -1    0.51    0.52
  -4  -2   1    1.32    0.31
   4  -2  -1    0.65    0.58
  -4  -2   1    0.14    0.65
  -4   2  -1    1.53    0.59
   4   2   1    1.41    0.68
  -4  -2  -1    0.82    0.40
   4  -2   1    1.32    0.68
   4   2  -1    1.18    0.61
  -4   2   1    2.06    0.60
  -4  -2  -1    1.22    0.68
  -4   2   1    1.15    0.64
  -5  -2   1   84.70    1.81
  -5  -2   1   82.13    2.54
  -5   2  -1   85.36    2.33
   5   2   1   82.90    2.62
   5  -2  -1   82.67    2.51
  -5   2  -1   84.98    2.33
  -5   2   1   84.94    2.49
   5  -2   1   83.96    2.61
  -5   2   1   84.10    2.27
  -5  -2  -1   84.27    2.49
  -5  -2  -1   84.32    1.94
   5   2  -1   82.57    2.56
  -6  -2   1    3.33    0.87
   6   2   1    1.66    0.90
   6  -2  -1    2.32    0.78
  -6   2  -1    2.58    0.72
  -6  -2   1    2.08    0.45
  -6   2  -1    2.69    0.70
  -6   2   1    2.81    0.69
   6   2  -1    1.21    0.78
  -6  -2  -1    1.64    0.79
  -6  -2  -1    2.18    0.51
   6  -2   1    1.47    0.82
  -6   2   1    1.92    0.79
  -7  -2   1   19.17    1.45
  -7  -2   1   17.08    0.85
   7   2   1   16.98    1.43
  -7   2  -1   17.91    1.16
   7  -2  -1   19.55    1.43
  -7   2  -1   14.85    1.21
  -7   2   1   18.02    1.40
  -7   2   1   15.74    1.11
  -7  -2  -1   15.47    0.88
   7   2  -1   18.97    1.51
  -7  -2  -1   15.13    1.31
   7  -2   1   13.93    1.37
   8   2   1    2.55    1.07
  -8  -2   1    1.20    1.05
   8  -2  -1    2.03    1.01
  -8   2  -1    2.87    0.97
  -8   2  -1    1.41    0.83
   8   2  -1    2.91    1.03
  -8   2   1    0.54    1.05
  -8   2   1    0.18    0.75
  -8  -2  -1    1.88    1.01
   8  -2   1    1.48    1.05
  -9   2  -1   19.68    1.43
  -9  -2   1   18.94    1.75
   9   2   1   19.99    1.83
   9  -2  -1   20.86    1.87
  -9   2  -1   19.46    1.56
   9  -2   1   17.43    1.75
   9   2  -1   20.28    1.83
  -9  -2  -1   20.61    1.81
  -9   2   1   19.68    1.74
  -9   2   1   19.49    1.53
 -10  -2   1    0.60    1.31
  10   2   1   -0.15    1.22
 -10   2  -1    1.31    1.02
  10  -2  -1    1.25    1.18
 -10  -2  -1    0.33    1.15
  10   2  -1    3.10    1.30
  10  -2   1   -0.37    1.34
 -10   2   1    0.57    1.07
  11  -2  -1   -0.78    1.35
 -11   2  -1   -0.52    1.05
 -11  -2   1    0.11    1.45
  11   2   1   -0.65    1.30
  11   2  -1   -0.20    1.42
 -11  -2  -1    1.32    1.28
 -11   2   1    0.32    1.19
  11  -2   1    0.37    1.40
  12   2   1    2.48    1.59
  12  -2  -1   -0.38    1.43
 -12  -2   1   -1.35    1.52
  12  -2   1    2.06    1.52
 -12   2   1    1.59    1.38
  12   2  -1    0.35    1.49
 -12  -2  -1    1.27    1.46
 -13  -2   1   -2.32    1.58
  13  -2  -1    0.50    1.73
  13   2   1   -1.50    1.66
  13   2  -1   -1.54    1.77
  13  -2   1    1.89    1.76
 -13  -2  -1   -0.95    1.58
 -13   2   1   -1.07    1.46
 -14  -2   1    0.86    1.88
  14  -2  -1    1.91    1.81
  14   2   1    4.23    2.08
  14  -2   1   -2.69    1.81
  14   2  -1    2.28    1.86
 -15  -2   1    7.44    2.28
   0  -2   2  601.79    9.71
   0  -2  -2  586.54    9.93
   0   2   2  578.56    9.96
   0   2  -2  594.35    9.92
   0   2  -2  598.89   10.07
  -1   2  -2    0.93    0.40
   1   2   2    0.31    0.42
  -1  -2   2    0.52    0.35
   1   2   2    0.97    0.35
   1  -2  -2    0.90    0.42
  -1   2   2    0.73    0.39
  -1   2   2    0.74    0.39
   1   2  -2    0.79    0.31
  -1  -2  -2    1.45    0.35
   1  -2   2    1.14    0.41
   1   2  -2    0.29    0.39
   2   2   2  165.75    3.33
  -2   2  -2  164.93    2.85
   2  -2  -2  161.66    3.04
  -2  -2   2  161.59    3.32
  -2   2  -2  157.89    3.28
   2   2   2  162.81    3.28
   2  -2   2  156.66    3.32
  -2  -2  -2  164.09    3.07
  -2   2   2  154.96    3.23
  -2   2   2  162.01    3.30
   2   2  -2  155.07    3.29
   2   2  -2  165.32    2.87
   3  -2  -2    1.03    0.52
  -3   2  -2    0.18    0.52
  -3   2  -2    0.52    0.42
  -3  -2   2    0.77    0.59
   3   2   2    0.30    0.58
   3   2   2    1.19    0.55
   3   2  -2    0.37    0.59
  -3   2   2    0.28    0.48
   3   2  -2    0.46    0.30
  -3   2   2    0.15    0.58
   3  -2   2    0.71    0.61
  -3  -2  -2    1.71    0.46
   4   2   2    1.59    0.62
   4   2   2    2.43    0.72
  -4   2  -2    2.99    0.67
   4  -2  -2    3.14    0.64
  -4   2  -2    2.80    0.55
  -4  -2   2    3.28    0.73
   4  -2   2    3.17    0.73
  -4  -2  -2    2.03    0.63
  -4   2   2    2.61    0.60
   4   2  -2    3.82    0.71
   4   2  -2    2.57    0.33
  -4   2   2    2.25    0.65
  -4  -2  -2    2.88    0.52
  -5   2  -2    5.50    0.77
   5  -2  -2    6.66    0.86
  -5  -2   2    4.72    0.86
  -5   2  -2    6.54    0.72
   5   2   2    6.09    0.89
   5   2  -2    6.32    0.44
  -5  -2  -2    5.50    0.81
   5   2  -2    5.81    0.91
  -5   2   2    5.64    0.86
   5  -2   2    7.21    1.00
  -5  -2  -2    7.37    0.64
  -5   2   2    6.17    0.75
   6  -2  -2   55.37    2.13
   6   2   2   59.29    2.34
  -6   2  -2   55.81    1.93
  -6  -2   2   59.84    2.28
  -6   2  -2   58.35    2.00
  -6  -2   2   56.02    1.50
  -6  -2  -2   58.70    1.70
   6  -2   2   60.59    2.36
  -6  -2  -2   59.67    2.18
   6   2  -2   57.80    1.45
  -6   2   2   59.46    2.22
  -6   2   2   59.23    1.95
   6   2  -2   57.48    2.23
  -7  -2   2    1.28    0.94
  -7   2  -2    1.55    0.71
   7  -2  -2    1.43    0.90
   7   2   2    1.27    0.91
  -7   2  -2    0.47    0.69
  -7  -2   2    1.43    0.46
  -7  -2  -2    1.31    0.90
  -7   2   2    1.95    0.71
   7   2  -2    0.61    0.83
   7  -2   2    0.97    0.88
  -7   2   2    1.04    0.86
  -7  -2  -2    0.56    0.55
   8  -2  -2   66.83    2.67
  -8  -2   2   66.51    2.77
   8   2   2   67.08    2.91
  -8   2  -2   73.14    2.46
  -8   2  -2   70.49    2.53
   8  -2   2   67.58    2.87
  -8   2   2   71.10    2.79
  -8  -2  -2   69.76    2.69
  -8   2   2   69.65    2.35
   8   2  -2   69.69    2.82
   9   2   2    1.64    1.13
  -9   2  -2   -2.12    0.88
  -9   2  -2   -0.05    0.87
   9  -2  -2   -0.56    0.97
  -9  -2   2    2.18    1.22
  -9   2   2   -0.28    1.05
  -9  -2  -2   -1.37    1.10
   9   2  -2   -1.40    0.98
   9  -2   2    0.02    1.10
 -10  -2   2   20.35    2.03
  10   2   2   21.69    2.04
  10  -2  -2   21.72    1.97
 -10   2  -2   21.37    1.69
 -10   2   2   21.65    1.91
  10  -2   2   16.44    1.89
 -10  -2  -2   20.12    1.85
  10   2  -2   17.45    1.87
  11   2   2   -1.21    1.48
 -11   2  -2    2.07    1.13
 -11  -2   2    0.50    1.41
  11  -2  -2    1.38    1.48
 -11  -2  -2    0.94    1.27
 -11   2   2    0.39    1.36
  11  -2   2    1.01    1.45
  11   2  -2    0.93    1.39
  12   2   2   11.90    2.11
  12  -2  -2   14.60    2.07
 -12  -2   2   15.12    2.06
  12  -2   2   15.12    2.26
 -12  -2  -2   13.99    1.87
  12   2  -2   14.26    2.13
 -12   2   2   13.01    1.97
  13  -2  -2    0.93    1.67
  13   2   2    1.61    1.86
 -13  -2   2    3.01    1.87
  13  -2   2    0.62    1.60
 -13  -2  -2   -0.74    1.50
 -13   2   2    2.62    1.72
  13   2  -2    1.72    1.86
  14   2   2    5.17    2.10
  14  -2  -2    3.49    1.82
 -14  -2   2    5.27    2.16
 -14   2   2    1.55    2.00
  14   2  -2    6.66    2.16
  14  -2   2    7.02    2.25
  15  -2  -2   -0.43    1.93
 -15  -2   2   -0.39    1.98
   0   2  -3   -0.19    0.42
   0   2  -3   -0.03    0.41
   0  -2   3    0.46    0.30
   0   2   3    0.50    0.43
   0  -2  -3   -0.14    0.43
   0   2   3    0.27    0.24
   1   2   3  978.27   15.71
   1   2   3  945.12   15.77
  -1  -2   3  943.28   15.67
   1  -2  -3  929.21   15.77
   1   2  -3  956.91   15.90
   1  -2   3  937.70   15.94
  -1   2   3  929.17   15.81
   1   2  -3  966.62   15.65
  -1  -2  -3  924.21   15.69
   2   2   3   -0.04    0.55
  -2   2  -3    0.77    0.60
  -2  -2   3    0.55    0.54
   2  -2  -3    0.74    0.36
  -2   2  -3    0.34    0.27
   2   2   3    0.54    0.49
   2  -2  -3    0.34    0.50
  -2   2   3    0.92    0.57
   2   2  -3   -0.14    0.39
   2   2  -3    0.24    0.52
  -2  -2  -3    0.20    0.48
   2  -2   3    0.06    0.54
  -3  -2   3  159.73    3.62
   3  -2  -3  165.61    3.33
   3   2   3  166.77    3.67
  -3   2  -3  166.17    3.10
  -3   2  -3  164.83    3.58
   3   2   3  164.33    3.54
   3  -2  -3  165.37    3.47
   3  -2   3  160.92    3.68
  -3   2   3  167.65    3.65
   3   2  -3  167.26    3.08
   3   2  -3  159.86    3.59
  -3  -2  -3  163.58    3.33
  -3   2   3  160.97    3.49
  -4   2  -3   -0.04    0.43
   4  -2  -3   -0.35    0.54
   4   2   3    0.08    0.65
  -4   2  -3    0.82    0.63
  -4  -2   3    1.07    0.66
   4   2   3   -0.30    0.52
   4   2  -3    0.14    0.31
  -4   2   3    0.89    0.65
  -4  -2  -3    0.43    0.48
  -4   2   3    0.44    0.56
  -4  -2  -3   -0.53    0.52
   4  -2   3   -0.04    0.63
   4   2  -3   -1.35    0.54
  -5   2  -3   22.30    1.05
  -5  -2   3   22.72    1.39
   5   2   3   21.28    1.38
   5  -2  -3   23.60    1.22
  -5   2  -3   24.35    1.26
  -5  -2  -3   21.82    1.25
   5   2  -3   22.31    0.80
   5   2  -3   22.28    1.31
  -5   2   3   22.83    1.19
   5  -2   3   21.65    1.39
  -5  -2  -3   22.86    1.08
  -5   2   3   23.06    1.35
  -6  -2   3    6.82    1.05
   6   2   3    5.82    0.99
  -6   2  -3    5.36    0.74
   6  -2  -3    4.59    0.87
  -6   2  -3    4.92    0.81
  -6   2   3    4.08    0.76
   6   2  -3    4.71    0.89
   6  -2   3    5.50    1.00
   6   2  -3    5.24    0.49
  -6   2   3    4.12    0.92
  -6  -2  -3    6.29    0.72
  -6  -2  -3    3.77    0.86
  -7   2  -3    0.46    0.69
   7   2   3   -0.45    0.82
  -7  -2   3    1.28    0.93
   7  -2  -3    0.42    0.78
  -7   2  -3    1.29    0.69
  -7  -2  -3    0.83    0.85
   7   2  -3    0.26    0.78
  -7   2   3    1.46    0.90
   7  -2   3   -0.40    0.97
  -7   2   3    1.14    0.66
  -7  -2  -3   -0.70    0.57
  -8   2  -3    0.39    0.81
  -8   2  -3    0.84    0.76
  -8  -2   3   -0.65    0.96
   8  -2  -3   -0.40    0.81
   8   2   3   -1.13    0.99
  -8   2   3    0.37    0.97
   8  -2   3    0.97    1.04
  -8   2   3    1.11    0.72
  -8  -2  -3   -0.56    0.91
   8   2  -3    0.68    0.93
  -9   2  -3    2.30    0.95
  -9   2  -3    1.67    0.93
   9  -2  -3    1.22    1.10
   9   2   3    2.39    1.26
  -9  -2   3    0.49    1.20
   9  -2   3    1.95    1.21
   9   2  -3    1.12    1.08
  -9  -2  -3    2.47    1.05
  -9   2   3    2.50    1.24
  10  -2  -3    1.41    1.30
  10   2   3    1.07    1.31
 -10   2  -3    1.30    0.99
 -10  -2   3    0.97    1.44
 -10  -2  -3   -0.26    1.11
  10   2  -3    2.13    1.40
 -10   2   3    1.01    1.21
  10  -2   3    1.47    1.31
  11  -2  -3   11.91    1.71
 -11  -2   3   15.56    1.93
  11   2   3    9.45    1.74
 -11   2   3    9.03    1.79
  11  -2   3   12.80    1.94
  11   2  -3   11.87    1.81
 -11  -2  -3   11.73    1.62
  12   2   3   -1.62    1.42
  12  -2  -3   -1.37    1.47
 -12  -2   3    1.33    1.57
 -12   2   3    0.35    1.52
  12  -2   3    0.85    1.75
  12   2  -3    0.37    1.46
 -12  -2  -3    3.56    1.43
 -13  -2   3   12.37    2.34
  13  -2  -3   11.97    2.20
  13   2   3    9.92    2.10
  13  -2   3   11.03    2.12
 -13   2   3   12.80    2.21
  13   2  -3   11.49    2.19
 -14  -2   3    0.40    1.88
  14  -2  -3    0.47    1.84
  14   2   3    0.22    1.92
  14   2  -3    3.15    1.98
  14  -2   3    0.49    1.80
 -14   2   3    0.47    1.67
  15  -2  -3    8.58    2.35
   0   2   4   48.44    1.10
   0   2  -4   47.75    1.45
   0  -2  -4   46.36    1.45
   0   2   4   46.34    1.44
   0  -2   4   46.31    1.20
   0   2  -4   48.87    1.48
   1   2   4   -0.25    0.50
  -1  -2   4   -0.90    0.47
   1  -2  -4   -0.35    0.57
   1   2   4   -0.54    0.44
   1  -2  -4   -0.08    0.26
  -1   2  -4    0.50    0.57
   1  -2   4    0.32    0.31
  -1  -2  -4    0.12    0.53
   1   2  -4    0.40    0.49
  -1   2   4   -0.65    0.56
   1   2  -4   -0.21    0.49
   1  -2   4   -0.42    0.51
  -2  -2   4  746.53   13.16
   2   2   4  786.08   13.22
   2   2   4  748.12   13.10
  -2   2  -4  772.90   13.30
   2  -2  -4  777.13   13.19
   2  -2  -4  766.20   12.77
   2  -2   4  772.48   12.54
  -2  -2  -4  763.72   13.11
  -2   2   4  759.97   13.27
   2   2  -4  805.19   12.98
   2  -2   4  754.18   13.35
   2   2  -4  762.98   13.24
   3  -2  -4   -0.12    0.45
  -3   2  -4   -0.07    0.32
   3  -2  -4    0.08    0.55
  -3  -2   4    0.26    0.70
  -3   2  -4    0.51    0.61
   3   2   4    0.66    0.59
   3   2   4    0.33    0.61
   3   2  -4    0.35    0.59
  -3   2   4   -0.09    0.59
  -3  -2  -4    0.98    0.56
   3  -2   4    0.21    0.62
   3   2  -4   -0.27    0.42
   4  -2  -4  221.09    4.62
   4   2   4  221.18    4.69
  -4   2  -4  230.60    4.28
  -4   2  -4  222.96    4.79
  -4  -2   4  218.79    4.92
   4  -2  -4  225.56    4.55
   4   2   4  227.31    4.98
   4   2  -4  228.71    4.23
  -4  -2  -4  226.83    4.56
  -4   2   4  221.85    4.90
   4  -2   4  219.48    4.98
  -4   2   4  223.80    4.68
   4   2  -4  225.86    4.86
   5  -2  -4    0.48    0.56
  -5  -2   4    0.02    0.76
  -5   2  -4   -0.41    0.43
  -5   2  -4    0.47    0.68
   5  -2  -4   -0.29    0.58
   5   2   4   -0.77    0.60
   5   2   4   -0.41    0.69
  -5   2   4   -1.76    0.73
   5   2  -4   -0.45    0.35
   5  -2   4   -0.05    0.73
  -5  -2  -4   -0.11    0.58
  -5  -2  -4   -0.37    0.62
  -5   2   4   -0.83    0.59
   5   2  -4   -0.71    0.62
  -6  -2   4   68.81    2.61
   6   2   4   68.76    2.64
  -6   2  -4   73.42    2.39
  -6   2  -4   73.39    2.13
   6  -2  -4   69.64    2.34
   6  -2  -4   73.36    2.21
   6  -2   4   67.58    2.61
   6   2  -4   71.37    1.80
   6   2  -4   69.06    2.50
  -6   2   4   73.92    2.63
  -6   2   4   71.36    2.25
  -6  -2  -4   70.20    2.35
  -6  -2  -4   75.70    2.17
  -7   2  -4    2.30    0.68
  -7  -2   4    0.16    0.95
  -7   2  -4    1.19    0.75
   7  -2  -4    3.66    0.90
   7   2   4    1.04    0.95
   7  -2  -4    2.31    0.66
  -7   2   4    3.00    1.00
  -7   2   4    3.90    0.78
   7   2  -4    2.96    0.89
   7  -2   4    2.06    0.98
  -7  -2  -4    2.81    0.89
  -7  -2  -4    2.97    0.67
  -8   2  -4    6.98    1.04
  -8   2  -4    8.01    1.02
  -8  -2   4    5.98    1.35
   8  -2  -4    6.61    1.15
   8  -2  -4    7.61    0.89
   8   2   4    6.46    1.32
   8  -2   4    6.11    1.38
  -8  -2  -4    7.61    0.93
  -8  -2  -4    5.62    1.08
  -8   2   4    8.88    1.38
   8   2  -4    6.28    1.15
  -8   2   4    8.16    0.95
   9  -2  -4    0.63    0.98
   9   2   4   -0.38    1.12
  -9  -2   4   -0.34    1.20
  -9   2  -4    1.42    0.92
  -9   2  -4    0.10    0.91
   9  -2   4    1.49    1.21
  -9  -2  -4   -0.23    0.98
  -9   2   4    0.06    1.16
   9   2  -4    0.60    1.13
  10   2   4   68.43    3.39
 -10  -2   4   64.99    3.19
  10  -2  -4   71.64    3.15
 -10  -2  -4   66.62    2.93
  10  -2   4   68.03    3.42
 -10   2   4   70.51    3.25
  10   2  -4   66.84    3.14
  11   2   4   -0.93    1.46
 -11  -2   4   -0.15    1.42
  11  -2  -4    1.37    1.31
 -11   2   4   -0.17    1.43
 -11  -2  -4    1.87    1.21
  11   2  -4    0.95    1.34
  11  -2   4    2.06    1.51
  12   2   4   20.09    2.32
  12  -2  -4   19.94    2.10
 -12  -2   4   21.06    2.40
  12   2  -4   18.57    2.17
  12  -2   4   24.21    2.51
 -12   2   4   22.80    2.45
 -13  -2   4   -0.16    1.71
  13   2   4   -0.60    1.74
  13  -2  -4    2.60    1.76
  13   2  -4   -1.33    1.54
  13  -2   4   -1.91    1.63
 -13   2   4    1.74    1.73
 -14  -2   4   -0.98    1.74
  14   2   4   -0.06    1.77
  14  -2  -4    1.47    1.85
 -14   2   4   -1.30    1.66
  14  -2   4    1.67    2.03
  14   2  -4    0.45    1.85
   0   2   5    3.31    0.64
   0  -2  -5    2.47    0.65
   0   2  -5    1.78    0.59
   0   2  -5    2.09    0.63
   0  -2   5    2.93    0.49
   0   2   5    2.57    0.42
  -1  -2   5   28.94    1.11
   1   2   5   27.61    1.03
  -1   2  -5   28.81    1.27
   1  -2  -5   28.39    0.83
   1  -2  -5   26.36    1.19
   1   2   5   25.34    1.12
   1  -2   5   26.68    0.86
  -1  -2  -5   26.61    1.20
   1   2  -5   28.89    1.19
   1  -2   5   28.13    1.23
   1   2  -5   29.74    1.19
  -1   2   5   27.99    1.22
   2  -2  -5   -0.12    0.38
  -2  -2   5    0.73    0.58
   2  -2  -5   -0.31    0.56
   2   2   5   -0.48    0.55
  -2   2  -5    0.22    0.60
   2   2   5   -0.26    0.53
   2  -2   5   -0.64    0.59
   2  -2   5    0.63    0.34
  -2  -2  -5    0.38    0.57
   2   2  -5    0.21    0.53
  -2   2   5   -0.20    0.58
   2   2  -5   -0.20    0.55
   3  -2  -5   -0.43    0.43
   3   2   5   -0.24    0.56
  -3  -2   5   -0.44    0.64
  -3   2  -5   -0.43    0.61
   3  -2  -5   -0.62    0.55
   3   2   5   -0.04    0.64
   3  -2   5    0.03    0.36
   3   2  -5    0.08    0.58
  -3   2   5   -0.14    0.62
  -3  -2  -5   -0.64    0.58
   3   2  -5   -0.42    0.47
   3  -2   5   -0.29    0.65
   4  -2  -5   13.83    0.88
  -4   2  -5   12.32    1.04
   4   2   5   11.04    0.94
  -4  -2   5   11.97    1.07
  -4   2  -5   14.03    0.71
   4   2   5   14.51    1.12
   4  -2  -5   12.27    0.98
   4  -2   5   11.43    1.08
   4   2  -5   13.51    0.79
  -4   2   5   12.36    1.10
  -4  -2  -5   12.98    0.96
   4   2  -5   13.71    1.01
  -5  -2   5   15.37    1.27
  -5   2  -5   14.48    1.15
   5  -2  -5   14.93    1.02
  -5   2  -5   13.50    0.81
   5   2   5   13.49    1.25
   5   2   5   16.24    1.10
   5  -2  -5   13.09    0.98
  -5   2   5   14.88    1.24
   5   2  -5   12.50    1.07
   5   2  -5   14.08    0.80
   5  -2   5   15.51    1.32
  -5  -2  -5   15.40    1.06
  -6  -2   5   -0.26    0.84
  -6   2  -5   -0.31    0.51
   6  -2  -5    0.37    0.62
   6  -2  -5    0.73    0.72
   6   2   5    0.11    0.71
  -6   2  -5    0.67    0.76
   6   2   5    1.18    0.85
   6   2  -5    0.38    0.46
   6  -2   5    0.77    0.93
  -6  -2  -5    0.46    0.69
  -6   2   5   -0.36    0.81
   6   2  -5    0.42    0.75
  -6  -2  -5   -0.07    0.64
   7  -2  -5   17.56    1.32
   7  -2  -5   16.57    1.13
  -7   2  -5   17.20    1.13
   7   2   5   14.49    1.48
  -7  -2   5   18.49    1.57
  -7   2  -5   13.69    1.22
   7  -2   5   15.17    1.50
  -7  -2  -5   14.64    1.23
  -7  -2  -5   15.73    1.17
   7   2  -5   17.10    1.44
  -7   2   5   14.74    1.52
  -8   2  -5    4.24    0.87
   8   2   5    5.17    1.24
  -8  -2   5    2.00    1.15
   8  -2  -5    3.85    0.81
  -8   2  -5    4.15    0.97
   8  -2  -5    3.46    1.02
   8   2  -5    3.09    1.12
   8  -2   5    3.25    1.21
  -8   2   5    2.90    1.28
  -8  -2  -5    1.83    0.90
  -8  -2  -5    2.42    0.86
   9   2   5    4.70    1.33
   9  -2  -5    3.99    1.17
  -9   2  -5    4.51    1.12
  -9  -2   5    3.16    1.35
   9   2  -5    3.36    1.26
  -9   2   5    2.19    1.40
  -9  -2  -5    1.06    1.05
   9  -2   5    2.31    1.31
 -10  -2   5   -0.03    1.31
  10  -2  -5    0.43    1.23
  10   2   5    1.03    1.34
 -10  -2  -5    0.92    1.17
 -10   2   5    0.08    1.32
  10   2  -5    1.88    1.24
  10  -2   5   -0.53    1.33
  11   2   5    7.72    1.82
  11  -2  -5    9.96    1.71
 -11  -2   5    7.68    1.85
  11   2  -5   10.02    1.85
 -11   2   5    7.37    1.76
  11  -2   5   10.49    2.02
  12  -2  -5    0.46    1.48
  12   2   5    2.17    1.57
 -12  -2   5   -2.07    1.67
 -12   2   5    0.80    1.70
  12   2  -5   -1.67    1.37
  12  -2   5    1.64    1.73
 -13  -2   5   13.61    2.31
  13  -2  -5   12.86    2.11
  13   2   5   13.91    2.33
  13   2  -5   12.23    2.19
 -13   2   5   14.14    2.26
  13  -2   5   11.49    2.40
 -14  -2   5    4.05    2.18
  14   2   5   -2.67    1.66
  14   2  -5    0.25    1.83
  14  -2   5   -1.79    2.08
 -14   2   5   -3.13    1.88
   0   2   6   42.33    1.20
   0   2  -6   43.01    1.62
   0   2   6   42.63    1.55
   0  -2  -6   40.74    1.57
   0   2  -6   40.71    1.52
   0  -2   6   42.72    1.32
  -1  -2   6    1.31    0.57
   1   2   6    1.09    0.49
   1  -2  -6    0.83    0.38
  -1   2  -6    1.12    0.67
   1  -2  -6    1.09    0.67
   1   2   6    0.69    0.55
   1  -2   6    1.59    0.45
   1   2  -6    0.53    0.58
   1   2  -6    0.03    0.56
  -1  -2  -6    0.93    0.63
  -1   2   6    0.98    0.63
   1  -2   6    0.76    0.60
  -2   2  -6  117.00    3.02
   2   2   6  112.32    2.81
   2  -2  -6  112.18    2.89
   2  -2  -6  112.03    2.39
   2   2   6  120.54    2.80
  -2  -2   6  110.53    2.82
   2  -2   6  110.68    2.94
   2  -2   6  114.44    2.34
   2   2  -6  117.33    2.80
  -2  -2  -6  113.53    2.92
  -2   2   6  114.07    2.98
   2   2  -6  116.02    2.83
   3  -2  -6    0.78    0.68
   3   2   6    0.80    0.68
   3   2   6    0.96    0.59
   3  -2  -6    0.13    0.46
  -3  -2   6    0.84    0.68
  -3   2  -6    0.51    0.67
   3  -2   6    1.32    0.39
  -3   2   6    2.35    0.75
   3  -2   6    0.56    0.67
   3   2  -6    0.58    0.56
  -3  -2  -6    0.58    0.62
   3   2  -6    1.38    0.66
   4  -2  -6  192.45    4.03
   4  -2  -6  195.52    4.34
   4   2   6  189.45    4.49
  -4   2  -6  191.51    4.52
   4   2   6  191.67    4.25
  -4   2  -6  194.75    3.73
  -4  -2   6  193.76    4.59
   4   2  -6  188.28    3.99
  -4  -2  -6  192.88    4.33
   4  -2   6  192.52    3.78
   4   2  -6  193.03    4.38
  -4   2   6  190.44    4.58
   4  -2   6  180.88    4.54
   5  -2  -6   10.69    1.01
   5   2   6   10.97    0.97
   5   2   6   10.81    1.16
  -5  -2   6   11.48    1.20
  -5   2  -6   12.15    1.14
   5  -2  -6    9.63    0.89
  -5   2  -6   10.22    0.73
  -5  -2  -6   10.33    0.99
  -5   2   6   10.38    1.22
   5   2  -6   10.92    0.80
   5  -2   6   10.70    1.19
   5   2  -6   10.87    1.07
  -6  -2   6   47.25    2.26
   6  -2  -6   50.35    1.94
   6  -2  -6   51.28    1.96
  -6   2  -6   49.72    1.67
   6   2   6   48.05    1.97
   6   2   6   52.72    2.32
  -6   2  -6   47.31    2.07
  -6  -2  -6   50.03    1.95
   6   2  -6   50.68    1.65
  -6  -2  -6   51.04    1.97
  -6   2   6   50.08    2.29
   6   2  -6   50.70    2.14
   6  -2   6   49.60    2.32
  -7   2  -6    9.37    1.16
  -7   2  -6    9.07    0.88
   7   2   6    8.19    1.26
   7  -2  -6    6.79    0.95
  -7  -2   6    7.34    1.28
   7  -2  -6    8.64    1.03
  -7  -2  -6    7.30    1.02
   7  -2   6    8.52    1.30
  -7  -2  -6    9.03    1.06
  -7   2   6    9.27    1.32
   7   2  -6    9.30    1.18
  -8   2  -6   13.53    1.37
   8  -2  -6   12.96    1.33
   8  -2  -6   15.18    1.24
   8   2   6   18.32    1.74
  -8  -2   6   12.81    1.68
  -8  -2  -6   14.72    1.31
   8  -2   6   16.76    1.73
   8   2  -6   13.99    1.51
  -8   2   6   15.67    1.67
  -8  -2  -6   14.47    1.36
  -9  -2   6    9.64    1.63
   9  -2  -6    9.49    1.38
  -9   2  -6    9.92    1.40
   9   2   6   10.50    1.66
   9   2  -6    8.53    1.48
  -9   2   6    8.53    1.57
   9  -2   6   10.42    1.76
  -9  -2  -6    9.49    1.28
 -10  -2   6   36.85    2.61
  10  -2  -6   41.54    2.39
  10   2   6   36.96    2.64
  10  -2   6   40.51    2.71
 -10  -2  -6   37.58    2.28
  10   2  -6   43.32    2.64
 -10   2   6   41.60    2.75
  11  -2  -6    0.50    1.25
  11   2   6    3.20    1.65
 -11  -2   6   -0.27    1.50
  11  -2   6    0.64    1.73
  11   2  -6    0.69    1.40
 -11   2   6   -0.64    1.56
  12   2   6   13.50    2.12
 -12  -2   6   10.64    2.24
  12  -2  -6   14.11    1.92
  12   2  -6   12.76    2.05
  12  -2   6   12.19    2.12
 -12   2   6   11.03    2.13
  13   2   6    1.42    1.65
 -13  -2   6    0.55    1.91
  13  -2   6    1.16    1.84
 -13   2   6    2.37    1.99
  13   2  -6    3.34    1.80
 -14  -2   6    3.41    2.05
 -14   2   6    0.29    2.16
  14   2  -6   -1.85    1.69
   0  -2   7    3.84    0.58
   0   2  -7    3.70    0.78
   0   2   7    3.49    0.70
   0   2   7    3.97    0.50
   0  -2  -7    3.84    0.78
   0   2  -7    4.41    0.73
   1  -2  -7   20.42    0.85
   1  -2  -7   19.69    1.22
  -1   2  -7   18.76    1.22
   1   2   7   21.04    1.12
  -1  -2   7   20.93    1.07
   1   2   7   21.76    0.99
   1  -2   7   20.53    0.91
  -1   2   7   20.02    1.20
  -1  -2  -7   20.95    1.26
  -1   2   7   20.77    0.83
   1  -2   7   22.29    1.19
   1   2  -7   21.34    1.14
   1   2  -7   21.89    1.20
  -2   2  -7   23.04    1.35
   2  -2  -7   22.29    1.27
   2   2   7   24.33    1.17
   2  -2  -7   24.51    0.92
   2   2   7   22.05    1.18
  -2  -2   7   21.74    1.22
   2  -2   7   20.23    0.88
  -2  -2  -7   22.21    1.30
   2   2  -7   22.88    1.23
   2   2  -7   22.85    1.19
  -2   2   7   26.01    1.36
   2  -2   7   21.43    1.29
  -3   2  -7   12.12    1.14
   3   2   7   11.00    0.97
   3  -2  -7   11.31    0.76
   3   2   7   12.30    1.02
   3  -2  -7   11.18    1.01
  -3  -2   7   10.90    1.08
  -3   2   7   12.23    1.13
   3   2  -7   10.83    0.93
  -3  -2  -7   12.14    1.05
   3  -2   7   12.86    0.70
   3  -2   7   14.12    1.12
   3   2  -7   12.00    0.97
  -4  -2   7    0.29    0.75
  -4   2  -7    0.44    0.80
   4  -2  -7    1.87    0.71
   4  -2  -7    0.01    0.48
   4   2   7    1.25    0.73
   4   2   7    2.14    0.72
   4  -2   7    0.66    0.79
   4   2  -7    0.93    0.68
  -4   2   7    1.28    0.81
   4  -2   7    0.15    0.43
   4   2  -7    1.38    0.57
  -4  -2  -7    0.50    0.70
  -5   2  -7   21.76    1.43
   5  -2  -7   20.68    1.31
   5   2   7   19.52    1.26
   5   2   7   21.81    1.53
  -5   2  -7   22.25    0.97
   5  -2  -7   22.60    1.20
  -5  -2   7   20.28    1.50
   5  -2   7   19.14    1.47
   5   2  -7   23.89    1.41
  -5  -2  -7   21.54    1.37
   5   2  -7   21.86    1.14
  -5   2   7   23.54    1.57
  -6   2  -7    0.71    0.50
  -6   2  -7   -0.57    0.86
  -6  -2   7   -0.76    0.88
   6   2   7   -0.44    0.89
   6  -2  -7    1.29    0.75
   6  -2  -7    0.28    0.69
   6   2   7    1.28    0.72
   6   2  -7    0.25    0.57
   6   2  -7    1.80    0.78
   6  -2   7    0.93    0.95
  -6   2   7    0.10    0.99
  -6  -2  -7    0.26    0.76
   7   2   7    7.16    1.34
   7   2   7    8.24    1.15
   7  -2  -7    7.46    1.01
  -7   2  -7    7.16    1.10
   7  -2  -7    8.62    1.08
  -7  -2   7    7.22    1.33
  -7   2   7    5.40    1.27
  -7  -2  -7    6.62    1.00
   7  -2   7    5.91    1.26
  -7  -2  -7    5.56    0.99
   7   2  -7    7.40    1.16
   8  -2  -7   11.87    1.22
   8  -2  -7   12.36    1.33
  -8   2  -7   14.22    1.44
   8   2   7   14.38    1.68
  -8  -2   7   13.69    1.69
  -8  -2  -7   13.88    1.38
  -8  -2  -7   12.89    1.27
  -8   2   7   11.95    1.63
   8   2  -7   13.20    1.50
   8  -2   7   14.25    1.68
   9   2   7    7.12    1.63
   9  -2  -7    3.98    1.25
  -9   2  -7    7.53    1.43
  -9  -2   7    2.29    1.52
  -9   2   7    5.06    1.50
   9   2  -7    6.11    1.42
   9  -2   7    7.57    1.62
  -9  -2  -7    7.47    1.23
 -10  -2   7    0.80    1.46
 -10   2  -7    0.79    1.36
  10  -2  -7    1.32    1.22
  10   2   7   -0.76    1.32
  10   2  -7   -0.10    1.17
  10  -2   7   -0.71    1.36
 -10   2   7    1.51    1.57
  11   2   7    9.07    1.89
 -11  -2   7    9.68    1.88
  11  -2   7    8.42    1.98
  11   2  -7   10.61    1.83
 -11   2   7    9.21    1.94
  12   2   7    0.70    1.64
 -12  -2   7    1.26    1.72
 -12   2   7    0.68    1.83
  12  -2   7    0.82    1.71
  12   2  -7    0.24    1.49
 -13  -2   7    3.50    2.15
  13   2   7    1.94    1.74
 -13   2   7   -0.57    2.01
  13  -2   7    3.46    2.14
  13   2  -7    3.66    1.81
  14   2  -7   -3.96    1.66
 -14   2   7   -1.85    1.86
   0   2  -8  253.26    5.47
   0  -2  -8  243.46    5.44
   0  -2   8  251.81    5.30
   0  -2   8  249.99    4.99
   0   2   8  254.57    4.85
   0   2   8  245.66    5.28
   0   2  -8  248.19    5.29
   1   2   8    2.36    0.55
  -1  -2   8    1.97    0.64
   1   2   8    2.48    0.74
   1  -2  -8    1.73    0.80
   1  -2  -8    2.23    0.49
  -1   2  -8    3.33    0.84
  -1   2   8    2.30    0.73
  -1   2   8    0.85    0.43
  -1  -2  -8    1.42    0.77
   1   2  -8    1.09    0.65
   1  -2   8    2.26    0.58
   1   2  -8    2.70    0.76
   1  -2   8    2.65    0.72
  -2  -2   8    3.23    0.78
   2   2   8    3.53    0.73
   2   2   8    3.59    0.68
   2  -2  -8    2.95    0.82
   2  -2  -8    2.75    0.51
  -2   2  -8    3.84    0.88
  -2   2   8    2.55    0.76
   2  -2   8    3.35    0.55
   2   2  -8    3.43    0.77
   2   2  -8    1.88    0.67
   2  -2   8    2.67    0.82
  -2  -2  -8    2.83    0.91
   3  -2  -8   17.00    0.89
   3   2   8   19.28    1.18
  -3   2  -8   18.50    1.38
   3  -2  -8   17.39    1.26
   3   2   8   17.81    1.17
  -3  -2   8   18.67    1.31
   3  -2   8   19.24    1.33
   3   2  -8   16.86    1.15
  -3   2   8   18.45    1.34
   3   2  -8   15.63    1.10
   3  -2   8   17.16    0.86
  -3  -2  -8   17.23    1.31
  -4   2  -8   -0.96    0.74
   4  -2  -8   -1.02    0.74
   4   2   8   -0.66    0.73
   4  -2  -8    0.72    0.53
  -4  -2   8   -0.24    0.79
   4   2   8    0.14    0.68
  -4  -2  -8   -1.25    0.74
   4   2  -8   -0.07    0.63
  -4   2   8    1.00    0.84
   4  -2   8   -0.35    0.43
   4   2  -8    0.40    0.58
   4  -2   8   -0.52    0.77
   5  -2  -8    0.79    0.60
   5   2   8    0.03    0.79
   5  -2  -8    2.48    0.83
   5   2   8    3.22    0.83
  -5   2  -8    0.53    0.86
  -5  -2   8    2.58    0.93
  -5   2  -8    0.91    0.45
  -5  -2  -8    1.28    0.80
  -5   2   8    0.08    0.88
   5   2  -8    1.33    0.65
   5  -2   8   -0.07    0.83
   5  -2   8    0.86    0.53
   5   2  -8    1.74    0.76
   6   2   8   22.35    1.42
   6  -2  -8   21.97    1.44
  -6  -2   8   24.85    1.77
  -6   2  -8   23.07    1.64
   6  -2  -8   26.31    1.41
   6   2   8   22.55    1.74
  -6   2   8   23.19    1.76
   6  -2   8   20.33    1.66
  -6  -2  -8   23.46    1.54
   6   2  -8   26.42    1.61
   6   2  -8   26.08    1.33
   7   2   8    6.14    1.03
   7   2   8    4.42    1.32
   7  -2  -8    3.27    0.93
  -7   2  -8    2.81    1.08
  -7  -2   8    5.13    1.27
   7  -2  -8    3.90    0.94
   7  -2   8    4.50    1.25
   7   2  -8    5.27    1.12
  -7   2   8    6.00    1.38
  -7  -2  -8    5.01    0.90
  -7  -2  -8    3.84    1.03
  -8  -2   8   43.08    2.54
  -8   2  -8   44.02    2.30
   8   2   8   40.73    2.46
   8  -2  -8   43.93    2.15
   8  -2   8   41.09    2.53
   8   2  -8   47.63    2.40
  -8  -2  -8   38.62    2.04
  -8  -2  -8   43.78    2.07
  -8   2   8   39.16    2.55
   9  -2  -8    3.37    1.22
  -9   2  -8    5.52    1.28
  -9  -2   8    9.14    1.67
   9   2   8    6.27    1.63
  -9   2   8    2.39    1.44
   9  -2   8    4.67    1.51
   9   2  -8    8.58    1.49
 -10  -2   8   -1.13    1.42
  10   2   8   -1.30    1.28
 -10   2  -8   -1.34    1.16
  10   2  -8   -0.87    1.22
 -10   2   8    1.14    1.69
  10  -2   8    1.90    1.60
  11   2   8    2.10    1.68
 -11  -2   8   -0.52    1.57
 -11   2   8    1.42    1.68
  11   2  -8    4.33    1.56
  11  -2   8   -1.47    1.63
  12   2   8    6.20    2.00
 -12  -2   8   -0.38    1.79
  12   2  -8   -0.30    1.49
  12  -2   8    1.54    1.77
 -12   2   8    2.11    1.78
 -13  -2   8   -0.66    2.10
  13   2   8   -0.22    1.78
 -13   2   8    0.95    1.74
  13  -2   8    3.69    1.86
  13   2  -8   -0.34    1.67
   0   2  -9   -0.79    0.61
   0   2   9   -0.21    0.41
   0  -2  -9    0.15    0.80
   0   2   9    0.42    0.75
   0  -2   9   -0.47    0.57
   0  -2   9   -0.14    0.63
   0   2  -9    0.65    0.84
   1  -2  -9   47.71    2.07
  -1  -2   9   46.75    1.79
   1   2   9   51.19    1.68
  -1   2  -9   47.15    2.07
   1   2   9   50.56    1.92
  -1   2   9   50.51    2.00
  -1   2   9   49.29    1.51
   1  -2   9   49.22    1.92
   1   2  -9   49.41    1.87
   1   2  -9   48.61    2.00
   1  -2   9   48.72    1.63
  -1  -2  -9   45.71    2.03
   2  -2  -9   19.09    1.35
  -2  -2   9   17.90    1.24
   2  -2  -9   19.93    0.96
   2   2   9   20.24    1.16
  -2   2  -9   18.60    1.41
   2   2   9   19.90    1.25
   2  -2   9   17.84    0.95
   2   2  -9   17.38    1.26
   2  -2   9   19.76    1.35
  -2   2   9   18.75    1.36
   2   2  -9   18.72    1.20
  -2  -2  -9   19.42    1.40
   3   2   9   -0.69    0.61
   3  -2  -9   -0.01    0.46
  -3  -2   9    0.34    0.78
  -3   2  -9   -1.05    0.79
   3   2   9    0.23    0.66
   3  -2  -9    0.48    0.79
   3  -2   9    1.21    0.75
   3   2  -9   -0.68    0.70
   3   2  -9   -0.80    0.58
   3  -2   9    0.10    0.46
  -3   2   9    0.42    0.78
  -3  -2  -9    0.54    0.80
   4   2   9    1.80    0.82
  -4   2  -9    1.58    0.87
   4  -2  -9    1.42    0.55
   4  -2  -9    1.53    0.89
  -4  -2   9    0.42    0.91
   4   2   9    2.08    0.72
  -4  -2  -9    1.50    0.87
  -4   2   9    2.10    0.97
   4  -2   9    2.31    0.90
   4  -2   9    1.30    0.50
   4   2  -9    1.58    0.70
   4   2  -9    1.71    0.77
   5   2   9    3.55    0.98
  -5  -2   9    3.88    1.07
   5  -2  -9    4.06    0.75
  -5   2  -9    2.80    1.03
   5   2   9    1.67    0.80
   5  -2  -9    4.00    0.96
  -5   2   9    2.93    1.04
   5   2  -9    3.76    0.82
   5  -2   9    4.30    1.09
   5   2  -9    4.16    0.88
  -5  -2  -9    3.07    0.96
   6   2   9    2.01    0.87
   6  -2  -9    0.05    0.72
   6   2   9    0.74    0.98
   6  -2  -9   -0.85    0.82
  -6   2  -9    2.73    1.04
  -6  -2   9    0.55    1.08
   6   2  -9    0.35    0.71
  -6  -2  -9    0.32    0.98
   6  -2   9    0.55    0.98
   6   2  -9   -0.54    0.77
  -6   2   9    2.04    1.06
  -7  -2   9    1.74    1.39
   7   2   9   -0.99    1.05
   7   2   9    0.74    0.87
   7  -2  -9    1.04    0.96
   7  -2  -9    0.94    0.91
  -7   2  -9   -1.71    1.06
  -7   2   9   -0.78    1.12
   7  -2   9    2.70    1.26
   7   2  -9    1.82    1.01
  -7  -2  -9    0.66    0.80
  -7  -2  -9   -0.77    0.99
  -8   2  -9    1.88    1.19
   8   2   9    3.52    1.32
  -8  -2   9    2.84    1.39
   8   2  -9    2.76    1.20
  -8   2   9    2.40    1.35
  -8  -2  -9    1.83    1.14
   8  -2   9    3.75    1.41
   9   2   9   17.82    2.00
  -9  -2   9   19.31    2.12
  -9   2  -9   19.71    1.84
   9  -2   9   17.20    2.05
   9   2  -9   18.46    1.82
  -9   2   9   17.84    2.05
  10   2   9   -0.40    1.38
 -10   2  -9    0.95    1.31
 -10  -2   9   -0.53    1.55
  10   2  -9    0.58    1.27
  10  -2   9    0.50    1.63
 -10   2   9   -1.26    1.40
 -11  -2   9   -0.17    1.62
  11   2   9    0.55    1.68
 -11   2   9    3.31    1.81
  11  -2   9   -0.28    1.74
  11   2  -9   -0.71    1.39
  12   2   9   -1.08    1.65
 -12  -2   9   -0.93    1.77
 -12   2   9   -0.59    1.68
  12  -2   9    1.18    1.81
  13   2   9    1.20    1.92
 -13  -2   9    2.13    2.21
  13  -2   9    2.62    2.01
 -13   2   9    2.35    2.15
   0  -2 -10   53.26    2.25
   0  -2  10   50.68    1.87
   0   2  10   56.91    2.13
   0  -2  10   51.38    2.01
   0   2 -10   55.92    2.08
   0   2  10   53.98    1.73
   0   2 -10   51.66    2.21
   1  -2 -10   -0.81    0.82
  -1  -2  10   -0.08    0.67
   1   2  10    0.17    0.72
  -1   2 -10    0.26    0.80
   1   2  10    0.98    0.54
  -1   2  10   -0.45    0.76
   1   2 -10    0.44    0.89
   1  -2  10    0.28    0.58
  -1   2  10   -0.12    0.43
   1   2 -10   -0.25    0.68
   1  -2  10   -0.85    0.68
  -1  -2 -10    0.00    0.91
   2   2  10   75.25    2.35
  -2  -2  10   73.33    2.51
   2   2  10   79.05    2.54
   2  -2 -10   79.33    2.77
  -2   2 -10   76.33    2.79
   2  -2 -10   76.05    2.10
   2  -2  10   76.63    2.13
  -2   2  10   74.38    2.64
   2   2 -10   75.79    2.65
   2  -2  10   75.02    2.63
   2   2 -10   74.86    2.46
  -2  -2 -10   75.95    2.76
   3  -2 -10   -0.15    0.89
   3   2  10   -0.03    0.72
  -3   2 -10   -1.48    0.82
   3  -2 -10    0.10    0.50
  -3  -2  10   -0.06    0.75
   3   2  10   -0.48    0.62
   3  -2  10    0.60    0.53
   3   2 -10    0.38    0.70
   3  -2  10    0.36    0.75
   3   2 -10    0.26    0.82
  -3  -2 -10   -1.10    0.82
  -3   2  10    0.63    0.90
   4   2  10    2.88    0.90
  -4  -2  10    5.60    1.06
   4  -2 -10    4.42    0.67
   4  -2 -10    6.56    1.12
  -4   2 -10    6.89    1.22
   4   2  10    4.63    0.86
  -4   2  10    6.12    1.15
   4   2 -10    7.52    0.95
   4   2 -10    5.08    0.93
   4  -2  10    4.78    1.03
  -4  -2 -10    5.11    1.09
   5  -2 -10    0.48    0.95
   5   2  10    0.58    0.85
  -5   2 -10   -1.05    0.91
   5   2  10   -1.24    0.76
  -5  -2  10   -2.20    0.86
   5  -2 -10   -0.20    0.59
   5   2 -10    0.32    0.73
  -5  -2 -10   -0.30    0.90
   5   2 -10    0.81    0.80
   5  -2  10    0.31    0.96
  -5   2  10   -0.35    0.95
  -6   2 -10   13.21    1.50
  -6  -2  10   12.88    1.65
   6   2  10   11.55    1.24
   6   2  10   12.17    1.50
   6  -2 -10   14.73    1.41
   6   2 -10   12.31    1.18
   6  -2  10   11.65    1.49
  -6   2  10   13.33    1.68
  -6  -2 -10   13.11    1.53
   6   2 -10   13.54    1.33
   7  -2 -10   -0.48    0.89
  -7   2 -10   -0.73    1.02
   7   2  10    2.19    1.32
  -7  -2  10   -0.01    1.22
   7   2 -10   -0.22    0.99
   7  -2  10    0.63    1.23
  -7  -2 -10   -1.57    1.07
  -7   2  10    1.72    1.23
  -8  -2  10   13.89    1.89
   8   2  10   16.43    1.86
  -8   2 -10   15.77    1.75
   8   2 -10   19.71    1.72
  -8  -2 -10   12.83    1.58
  -8   2  10   15.52    1.91
   8  -2  10   17.38    1.94
  -9  -2  10   -1.66    1.37
  -9   2 -10    0.59    1.27
   9   2  10   -2.34    1.19
  -9   2  10    1.26    1.42
   9   2 -10   -0.73    1.16
   9  -2  10    0.37    1.59
 -10  -2  10    0.35    1.59
  10   2  10   -0.57    1.42
 -10   2 -10    0.33    1.35
  10  -2  10    1.73    1.62
 -10   2  10   -0.21    1.54
  10   2 -10   -1.10    1.24
  11   2  10    1.87    1.65
 -11  -2  10    3.61    1.76
 -11   2  10    5.62    1.89
  11  -2  10    2.29    1.76
  12   2  10    2.57    1.84
 -12  -2  10    1.59    1.98
 -12   2  10    2.18    2.02
  12  -2  10    1.95    2.11
   0   2  11    0.99    0.53
   0   2 -11    0.31    0.89
   0  -2  11    0.00    0.67
   0   2  11    0.69    0.80
   0  -2  11    0.21    0.70
   0  -2 -11    0.85    0.93
  -1  -2  11   16.58    1.25
   1  -2 -11   15.60    1.49
   1   2  11   16.77    1.29
  -1   2 -11   15.27    1.42
   1   2  11   14.49    1.03
   1  -2  11   15.49    1.04
  -1   2  11   13.92    1.26
   1  -2  11   14.62    1.21
  -1   2  11   15.94    0.95
  -1  -2 -11   13.96    1.41
   1   2 -11   14.49    1.36
   1   2 -11   14.08    1.16
   2   2  11    0.35    0.74
   2   2  11    1.83    0.72
   2  -2 -11    1.94    1.04
  -2  -2  11    1.80    0.88
  -2   2 -11    2.04    1.08
   2  -2 -11    1.35    0.57
   2  -2  11    2.16    0.81
   2   2 -11    1.53    0.71
  -2   2  11    1.80    0.51
  -2   2  11    1.06    0.88
   2  -2  11    2.71    0.65
   2   2 -11    1.89    0.91
  -2  -2 -11    3.49    1.00
  -3   2 -11    7.52    1.23
  -3  -2  11   10.54    1.20
   3  -2 -11    8.63    1.32
   3   2  11    6.02    1.01
   3   2  11    8.11    0.98
   3  -2  11    9.56    1.21
   3   2 -11    8.72    1.19
   3   2 -11    9.86    1.05
  -3  -2 -11    7.87    1.22
  -3   2  11    8.98    1.23
   4   2  11    2.81    0.93
   4  -2 -11    1.77    1.04
  -4   2 -11    3.24    1.11
   4   2  11    2.43    0.88
  -4  -2  11    3.24    1.13
  -4  -2 -11    0.46    0.97
   4   2 -11    3.28    0.87
  -4   2  11    3.15    1.08
   4   2 -11    2.14    0.93
   4  -2  11    2.44    1.02
  -5   2 -11    3.15    1.28
  -5  -2  11    1.48    1.09
   5  -2 -11    4.66    1.19
   5   2  11    3.24    1.07
   5   2  11    3.83    0.99
   5   2 -11    2.47    0.94
  -5   2  11    6.58    1.30
   5  -2  11    4.21    1.16
   5   2 -11    4.62    1.00
  -5  -2 -11    5.46    1.32
   6   2  11   -0.81    0.96
  -6  -2  11   -0.94    1.27
  -6   2 -11   -1.44    1.12
   6  -2 -11    0.95    1.02
   6   2 -11    1.20    0.95
   6  -2  11   -0.32    1.10
  -6   2  11    1.43    1.20
   6   2 -11   -0.56    0.86
  -6  -2 -11   -2.14    1.01
  -7   2 -11    1.42    1.15
   7  -2 -11    1.10    1.03
  -7  -2  11   -1.51    1.30
   7   2  11    0.78    1.22
   7  -2  11    0.48    1.24
  -7   2  11    0.70    1.42
  -7  -2 -11    0.74    1.23
   7   2 -11    0.96    1.10
   8   2  11    1.26    1.40
  -8   2 -11    0.09    1.16
  -8  -2  11   -0.78    1.40
   8   2 -11   -0.23    1.07
  -8  -2 -11   -0.16    1.18
   8  -2  11   -0.97    1.39
  -8   2  11   -0.33    1.34
  -9  -2  11    2.47    1.63
  -9   2 -11    4.20    1.44
   9   2  11    4.59    1.66
  -9  -2 -11    0.84    1.25
  -9   2  11    1.04    1.67
   9  -2  11    2.53    1.53
 -10  -2  11    0.49    1.82
 -10   2 -11    3.07    1.52
  10   2  11    4.05    1.85
 -10   2  11    3.94    1.75
  10  -2  11   -0.08    1.73
  11   2  11    2.77    1.67
 -11  -2  11   -2.98    1.59
  11  -2  11   -0.26    1.83
 -11   2  11    0.63    1.71
  12   2  11    2.58    2.02
 -12  -2  11    0.81    2.10
  12  -2  11   -2.21    1.72
 -12   2  11    1.57    1.85
   0   2  12   24.96    1.26
   0   2  12   25.47    1.63
   0   2 -12   23.25    1.79
   0  -2 -12   24.69    1.81
   0  -2  12   23.79    1.43
   0  -2  12   24.35    1.51
  -1   2 -12   -0.10    0.97
  -1  -2  12    0.01    0.64
   1   2  12   -0.13    0.62
   1   2  12    0.06    0.83
   1  -2 -12    0.79    1.02
  -1  -2  12    0.40    0.82
  -1   2  12   -1.34    0.75
   1   2 -12   -1.47    0.71
   1  -2  12   -0.95    0.69
  -1  -2 -12    0.59    1.03
   1   2 -12   -0.44    0.92
   1  -2  12   -0.30    0.73
  -2   2 -12    6.78    1.30
   2  -2 -12    4.82    1.28
   2   2  12    8.06    0.96
  -2  -2  12    6.75    1.12
   2   2  12    7.73    1.09
   2  -2  12    7.54    0.93
   2  -2  12    6.20    1.07
  -2   2  12    8.45    1.27
   2   2 -12    9.15    1.32
   2   2 -12    7.36    1.01
  -2  -2 -12    6.46    1.26
  -3   2 -12    7.43    1.33
   3  -2 -12    3.82    1.15
   3   2  12    7.20    1.03
   3   2  12    4.42    0.98
  -3  -2  12    5.90    1.21
   3  -2  12    4.76    1.08
  -3   2  12    5.34    1.23
  -3  -2 -12    5.59    1.22
   3   2 -12    5.25    1.17
   3   2 -12    5.80    0.98
  -4   2 -12   38.40    2.30
   4  -2 -12   41.41    2.31
  -4  -2  12   42.31    2.26
   4   2  12   41.60    2.06
   4   2  12   40.35    1.93
  -4   2  12   39.91    2.28
  -4  -2 -12   41.58    2.31
   4   2 -12   43.47    2.01
   4  -2  12   38.96    2.23
   4   2 -12   41.65    2.15
   5   2  12   -0.05    0.93
   5  -2 -12    0.52    1.08
  -5  -2  12   -0.61    1.18
  -5   2 -12    0.41    1.15
  -5  -2 -12   -1.07    1.20
   5   2 -12    0.79    0.84
   5  -2  12    1.57    1.13
   5   2 -12    1.11    0.92
  -5   2  12    1.86    1.22
  -6  -2  12   49.39    2.82
   6   2  12   51.97    2.64
  -6   2 -12   55.56    2.89
   6  -2 -12   55.01    2.61
  -6   2  12   59.70    3.01
   6  -2  12   51.15    2.79
   6   2 -12   55.51    2.68
   6   2 -12   61.90    2.59
  -6  -2 -12   52.31    2.78
   7  -2 -12    0.70    1.07
   7   2  12   -0.57    1.25
  -7   2 -12   -0.73    1.20
  -7  -2  12   -0.83    1.31
   7  -2  12    0.09    1.38
  -7   2  12    0.80    1.40
   7   2 -12   -0.81    1.07
  -7  -2 -12    1.00    1.31
   8   2  12   10.84    1.85
  -8  -2  12    9.60    1.87
  -8   2 -12   15.21    1.94
   8  -2  12    9.03    1.75
  -8   2  12   12.94    2.05
  -8  -2 -12    7.41    1.56
  -9   2 -12    0.66    1.43
  -9  -2  12   -1.21    1.76
   9   2  12    1.84    1.60
  -9  -2 -12    1.68    1.36
   9  -2  12    1.41    1.70
  -9   2  12    0.31    1.53
 -10  -2  12   11.69    2.31
 -10   2 -12   13.23    1.94
  10   2  12   14.16    2.26
  10  -2  12    7.34    2.08
 -10   2  12    8.60    2.03
  11   2  12    2.30    1.71
 -11  -2  12   -1.24    1.77
  11  -2  12    1.24    1.99
 -11   2  12    1.28    2.01
 -12  -2  12    7.65    2.25
  12   2  12    7.12    2.19
  12  -2  12    7.09    2.19
 -12   2  12    7.16    2.24
   0   2  13    0.89    0.95
   0  -2  13    0.46    0.76
   0   2 -13    0.51    1.06
   0  -2  13    0.57    0.82
   0  -2 -13    2.83    1.28
  -1   2 -13   12.19    1.50
   1   2  13   15.96    1.42
   1   2  13   15.44    1.29
  -1  -2  13   14.39    1.27
  -1  -2  13   17.18    1.41
   1  -2 -13   13.50    1.60
  -1  -2 -13   16.55    1.63
   1   2 -13   16.20    1.31
   1  -2  13   15.78    1.34
   1   2 -13   15.40    1.58
   1  -2  13   15.51    1.25
  -1   2  13   12.93    1.42
  -2   2 -13    4.08    1.26
   2  -2 -13    1.94    1.15
   2   2  13    2.59    0.81
   2   2  13    3.87    1.09
  -2  -2  13    2.93    1.07
  -2   2  13    2.31    1.14
   2   2 -13    1.59    0.83
   2   2 -13    2.10    1.11
  -2  -2 -13    2.62    1.21
   2  -2  13    2.71    0.99
  -3   2 -13    1.68    1.22
   3  -2 -13    0.93    1.19
  -3  -2  13    1.56    1.05
   3   2  13    1.24    0.88
   3   2  13    1.55    0.95
   3  -2  13    3.27    1.01
   3   2 -13    0.94    0.88
  -3  -2 -13    0.40    1.27
  -3   2  13    2.78    1.15
   3   2 -13    2.37    1.18
  -4  -2  13    0.46    1.22
   4   2  13    0.57    1.06
   4   2  13   -0.93    0.79
   4  -2 -13    1.15    1.15
  -4   2 -13   -0.97    1.22
  -4   2  13    2.28    1.20
   4   2 -13   -0.46    0.78
   4  -2  13   -0.22    1.06
  -4  -2 -13   -0.50    1.14
   4   2 -13    1.65    1.09
  -5  -2  13   21.44    2.04
   5  -2 -13   23.30    1.94
   5   2  13   21.05    1.72
  -5   2 -13   23.50    2.06
  -5  -2 -13   24.89    2.06
   5   2 -13   23.97    1.69
   5  -2  13   27.32    2.10
   5   2 -13   25.19    1.81
  -5   2  13   30.05    2.28
   6   2  13   -0.50    1.02
   6  -2 -13   -1.31    1.06
  -6  -2  13    3.75    1.51
  -6   2 -13    1.60    1.31
   6  -2  13    2.55    1.40
  -6   2  13   -0.70    1.43
  -6  -2 -13   -1.95    1.18
  -7  -2  13    7.64    1.81
   7   2  13    9.16    1.54
  -7   2 -13   10.61    1.73
   7  -2 -13    8.92    1.42
  -7  -2 -13   11.17    1.78
  -7   2  13    7.20    1.72
   7  -2  13   11.98    1.89
  -8  -2  13    0.19    1.67
  -8   2 -13    0.08    1.44
   8   2  13    1.69    1.55
   8  -2  13    0.69    1.52
  -8  -2 -13    0.98    1.41
  -8   2  13    4.37    1.77
  -9   2 -13   -1.54    1.37
  -9  -2  13    2.49    1.90
   9   2  13    1.57    1.59
   9  -2  13   -0.02    1.55
  -9  -2 -13    0.20    1.48
  -9   2  13    2.97    1.77
  10   2  13    1.26    1.84
 -10  -2  13    2.50    1.83
 -10   2 -13    0.16    1.63
  10  -2  13    2.48    1.79
 -10   2  13    0.42    1.77
  11   2  13    2.85    1.98
 -11  -2  13    3.87    2.19
 -11   2  13    3.63    2.17
  11  -2  13    1.47    1.90
   0  -2  14    0.00    0.82
   0   2  14   -0.82    0.97
   0  -2 -14   -1.01    1.18
   0  -2  14    1.15    0.87
   0   2 -14   -1.13    1.16
  -1  -2  14    1.30    1.06
   1  -2 -14   -2.30    1.12
  -1   2 -14   -0.70    1.20
   1   2  14    0.40    0.98
  -1  -2  14    0.67    0.80
  -1   2  14    1.87    1.03
   1  -2  14    1.95    0.98
   1   2 -14    0.51    1.14
  -1  -2 -14    1.71    1.28
  -2  -2  14   65.97    2.72
   2  -2 -14   69.43    3.13
  -2  -2  14   60.39    2.49
  -2   2 -14   62.20    3.02
   2   2  14   65.39    2.69
   2   2 -14   62.90    2.94
  -2   2  14   67.82    2.92
   2  -2  14   66.44    2.75
   2   2 -14   66.22    2.60
  -3  -2  14    0.86    1.06
  -3   2 -14    3.00    1.33
   3   2  14    0.22    0.95
   3   2  14    2.15    0.90
   3  -2 -14   -0.14    1.18
  -3   2  14    1.10    1.18
  -3  -2 -14    0.93    1.27
   3   2 -14    0.47    0.90
   3  -2  14    0.77    1.00
   3   2 -14   -0.95    1.14
  -4  -2  14   45.84    2.59
   4  -2 -14   43.59    2.56
  -4   2 -14   45.64    2.72
   4   2  14   42.22    2.21
  -4   2  14   46.09    2.60
   4   2 -14   46.07    2.45
   4  -2  14   47.59    2.54
  -4  -2 -14   43.51    2.62
   5   2  14    1.07    1.02
   5  -2 -14    0.65    1.19
  -5  -2  14   -1.75    1.33
  -5   2 -14    3.41    1.55
   5   2 -14    2.39    1.15
  -5  -2 -14   -0.70    1.40
   5  -2  14    1.43    1.21
  -5   2  14    0.21    1.33
  -6  -2  14    6.35    1.67
  -6   2 -14    2.43    1.39
   6  -2 -14    4.98    1.39
   6   2  14    3.17    1.20
  -6  -2 -14    2.69    1.61
   6  -2  14    4.03    1.42
  -6   2  14    2.16    1.52
   7  -2 -14    0.64    1.17
  -7   2 -14    1.41    1.43
  -7  -2  14   -0.04    1.43
   7   2  14    0.39    1.32
  -7   2  14   -2.75    1.36
  -7  -2 -14   -0.46    1.46
   7  -2  14   -1.44    1.44
  -8  -2  14    1.05    1.62
   8   2  14   -0.36    1.34
  -8   2 -14   -0.37    1.37
   8  -2  14   -0.14    1.44
  -8   2  14    0.48    1.58
  -8  -2 -14   -1.91    1.36
   9   2  14   -3.31    1.30
  -9   2 -14    1.02    1.46
  -9  -2  14   -1.22    1.73
  -9   2  14   -0.41    1.66
  -9  -2 -14   -0.81    1.54
   9  -2  14   -3.99    1.64
 -10   2 -14   20.23    2.36
  10   2  14   17.02    2.38
 -10  -2  14   19.76    2.58
 -10   2  14   13.84    2.42
  10  -2  14   16.69    2.52
  11   2  14    1.34    1.95
 -11  -2  14    1.24    1.90
  11  -2  14   -2.28    2.00
 -11   2  14    4.48    2.28
   0  -2  15   -0.56    0.78
   0  -2 -15    0.50    1.22
   0   2 -15    1.06    1.21
   0   2  15    1.64    1.11
  -1  -2  15    1.58    1.07
   1   2  15    2.40    1.13
  -1   2 -15    0.55    1.26
   1  -2 -15    2.43    1.37
  -1  -2 -15    2.69    1.45
   1   2 -15    4.48    1.45
   1  -2  15    2.57    1.02
  -1   2  15    3.41    1.24
  -2   2 -15    1.83    1.30
   2  -2 -15    0.87    1.34
  -2  -2  15    0.56    1.11
   2   2  15    2.12    1.20
  -2  -2 -15    1.27    1.37
   2  -2  15    0.06    0.95
   2   2 -15   -0.36    1.16
  -2   2  15   -0.49    1.24
  -3  -2  15   -0.65    1.17
   3  -2 -15    0.41    1.46
  -3   2 -15    0.77    1.35
   3  -2  15   -1.08    0.97
  -3  -2 -15    0.18    1.36
  -3   2  15    2.01    1.39
   3   2 -15   -0.11    1.18
  -4  -2  15    0.59    1.35
   4  -2 -15    1.05    1.32
  -4   2 -15    2.91    1.55
  -4   2  15    2.29    1.52
   4   2 -15    1.48    1.17
  -4  -2 -15    2.03    1.53
   4  -2  15    3.70    1.23
   5   2  15    6.43    1.23
   5  -2 -15    5.44    1.64
  -5  -2  15    6.74    1.59
  -5   2 -15    7.08    1.84
   5   2 -15    8.00    1.44
   5  -2  15    6.74    1.48
  -5  -2 -15    5.41    1.69
  -5   2  15    5.58    1.69
   6   2  15    2.44    1.20
  -6   2 -15    1.30    1.58
  -6  -2  15   -1.90    1.52
   6  -2 -15    1.63    1.28
   6  -2  15    0.39    1.41
  -6   2  15   -1.30    1.59
  -6  -2 -15    1.63    1.60
   7   2  15    2.41    1.36
  -7  -2  15    0.16    1.66
  -7   2 -15    1.70    1.57
  -7  -2 -15    2.16    1.66
  -7   2  15    1.59    1.80
   7  -2  15    0.73    1.56
  -8   2 -15    2.02    1.68
   8   2  15    0.37    1.41
  -8  -2  15    2.64    1.78
   8  -2  15   -1.67    1.57
  -8  -2 -15    0.11    1.44
  -8   2  15    1.06    1.87
  -9  -2  15    1.29    2.08
  -9   2 -15   -2.53    1.59
   9   2  15   -0.18    1.50
   9  -2  15   -2.28    1.70
  -9  -2 -15    0.32    1.72
  -9   2  15   -4.46    1.76
  10   2  15    0.59    1.80
 -10   2 -15    3.59    1.86
 -10  -2  15    1.03    2.18
 -10   2  15    3.74    2.04
  10  -2  15   -0.83    1.84
  11   2  15    5.03    2.05
   0  -2 -16    5.42    1.64
   0   2 -16    3.17    1.41
   0   2  16    8.93    1.44
  -1   2 -16   -1.14    1.23
   1   2  16   -0.26    1.12
   1  -2 -16    1.32    1.50
  -1   2  16    1.20    1.19
  -1  -2 -16    0.06    1.30
   1   2 -16   -0.35    1.36
   2  -2 -16   15.83    1.89
  -2   2 -16   12.23    1.84
  -2  -2  16   12.65    1.58
   2   2 -16   12.37    1.82
  -2   2  16   12.79    1.71
   2  -2  16    9.72    1.34
  -2  -2 -16    7.51    1.77
  -3  -2  16   -0.20    1.23
  -3   2 -16   -1.57    1.32
   3  -2 -16   -0.35    1.35
  -3   2  16    0.03    1.40
  -3  -2 -16    1.45    1.41
   3  -2  16   -0.66    0.94
   3   2 -16   -0.10    1.24
   4  -2 -16   25.41    2.37
  -4   2 -16   22.61    2.30
  -4  -2  16   24.70    2.18
  -4   2  16   28.97    2.33
  -4  -2 -16   27.51    2.40
   4  -2  16   27.96    2.12
   4   2 -16   25.27    2.19
   5  -2 -16   -1.89    1.28
  -5  -2  16   -1.96    1.42
  -5   2 -16   -0.19    1.53
   5   2 -16   -2.14    1.05
  -5  -2 -16    0.33    1.59
   5  -2  16    0.56    1.30
  -5   2  16   -0.65    1.43
  -6  -2  16    2.84    1.63
  -6   2 -16    0.05    1.64
   6  -2 -16    2.28    1.40
   6  -2  16    1.99    1.56
  -6   2  16    2.10    1.58
  -6  -2 -16    2.64    1.77
  -7  -2  16    0.53    1.76
  -7   2 -16    1.68    1.78
  -7  -2 -16   -1.39    1.62
   7  -2  16    0.90    1.61
  -7   2  16   -0.90    1.56
  -8   2 -16    0.22    1.59
  -8  -2  16    1.10    1.81
   8   2  16    0.49    1.47
   8  -2  16    2.62    1.69
  -8   2  16    1.89    1.79
  -8  -2 -16    1.13    1.59
   9   2  16   -0.32    1.43
  -9   2 -16   -1.44    1.80
  -9  -2  16   -0.03    2.12
  -9   2  16   -0.69    2.04
  -9  -2 -16    0.02    1.75
   9  -2  16    0.19    1.69
 -10   2 -16    4.90    2.02
  10   2  16    2.82    1.95
  10  -2  16    1.77    1.84
   0  -2 -17   -0.46    1.36
   0   2  17    0.75    1.33
   0   2 -17    0.87    1.39
  -1   2 -17   -0.31    1.41
   1  -2 -17    0.97    1.47
  -1   2  17    0.36    1.24
   1   2 -17    3.27    1.45
  -1  -2 -17   -0.05    1.39
   2  -2 -17    0.06    1.45
  -2   2 -17    0.04    1.40
  -2  -2 -17   -0.24    1.41
  -2   2  17    0.81    1.36
   2   2 -17    1.10    1.39
   3  -2 -17    0.46    1.42
  -3  -2  17    0.12    1.34
  -3   2 -17    1.15    1.54
  -3   2  17    2.19    1.49
   3   2 -17    0.59    1.36
  -3  -2 -17    1.74    1.53
  -4  -2  17    0.57    1.44
  -4   2 -17    0.85    1.51
   4  -2 -17    0.52    1.45
  -4   2  17   -1.72    1.49
   4   2 -17   -0.85    1.35
  -4  -2 -17   -0.51    1.42
   4  -2  17   -0.34    1.19
  -5  -2  17   -1.02    1.52
  -5   2 -17    0.51    1.59
   5  -2 -17   -2.39    1.48
   5  -2  17    0.67    1.28
  -5  -2 -17    2.68    1.68
   5   2 -17   -0.08    1.32
  -5   2  17   -0.53    1.46
  -6  -2  17   -1.68    1.63
   6  -2 -17   -1.91    1.41
  -6   2 -17    0.32    1.71
  -6  -2 -17    3.43    1.87
  -6   2  17   -1.79    1.52
   6  -2  17    1.63    1.47
  -7  -2  17   -0.17    1.71
  -7   2 -17    1.92    1.92
  -7   2  17   -0.98    1.59
  -7  -2 -17    2.12    1.71
   7  -2  17    2.48    1.62
  -8  -2  17   -1.85    1.71
  -8   2 -17    0.87    1.88
  -8  -2 -17   -1.61    1.54
   8  -2  17   -0.83    1.75
  -8   2  17   -2.39    1.68
  -9  -2  17    2.97    2.30
  -9   2 -17   -0.53    1.75
  -9   2  17    0.60    1.91
  -9  -2 -17    3.29    2.02
   9  -2  17   -3.73    1.78
 -10   2 -17   -2.10    1.95
   0  -2 -18   34.93    2.73
   1  -2 -18    0.47    1.66
  -1   2 -18   -1.88    1.41
   1   2 -18    1.46    1.60
  -1  -2 -18    1.50    1.57
  -1   2  18    1.71    1.38
   2  -2 -18    1.63    1.71
  -2   2 -18   -1.15    1.49
  -2  -2 -18   -0.02    1.66
   2   2 -18    1.21    1.47
  -2   2  18    4.68    1.50
   3  -2 -18   -1.13    1.49
  -3   2 -18   -0.22    1.57
  -3  -2 -18    0.24    1.70
   3   2 -18   -0.92    1.38
  -3   2  18   -0.78    1.43
  -4  -2  18   -1.59    1.51
   4  -2 -18    0.40    1.70
  -4   2 -18   -0.81    1.58
  -4   2  18   -0.83    1.56
   4   2 -18   -1.09    1.44
  -4  -2 -18   -3.05    1.43
  -5  -2  18   -0.64    1.59
   5  -2 -18   -1.68    1.45
  -5   2 -18   -0.52    1.59
  -5  -2 -18    1.37    1.79
  -5   2  18   -0.28    1.69
   5   2 -18    0.26    1.52
  -6   2 -18    7.47    2.01
   6  -2 -18    8.85    2.00
  -6  -2  18    9.85    2.13
  -6   2  18    8.31    2.23
   6  -2  18    5.62    1.90
  -6  -2 -18    6.88    2.18
  -7   2 -18   -0.44    1.95
  -7  -2  18   -1.14    1.72
  -7  -2 -18   -0.71    1.87
   7  -2  18    0.05    1.70
  -7   2  18    1.79    2.06
  -8   2 -18   13.01    2.47
  -8  -2  18   17.09    2.57
  -8  -2 -18   16.23    2.53
  -8   2  18   16.28    2.69
   8  -2  18   16.06    2.42
   9  -2  18   -1.14    1.85
  -9  -2 -18   -0.72    2.02
   0   2 -19   -2.16    1.59
   0  -2 -19    1.77    1.71
   1  -2 -19    9.90    2.07
  -1   2 -19    8.15    2.01
   1   2 -19   11.10    2.06
  -1  -2 -19    7.90    1.94
  -2   2 -19    3.38    1.93
   2  -2 -19   -0.81    1.70
  -2   2  19   -0.34    1.54
  -2  -2 -19    2.81    1.75
   2   2 -19    2.26    1.71
  -3   2 -19   -1.42    1.74
   3  -2 -19    1.62    1.67
   3   2 -19    1.82    1.68
  -3  -2 -19    0.84    1.88
  -3   2  19    1.16    1.45
   4  -2 -19   -0.21    1.69
  -4   2 -19   -2.50    1.54
   4   2 -19   -2.42    1.43
  -4  -2 -19   -3.65    1.74
  -4   2  19   -0.95    1.44
  -5  -2  19    1.14    1.78
  -5   2 -19    3.07    2.11
   5  -2 -19   -0.99    1.76
  -5   2  19    1.64    1.72
  -5  -2 -19    2.97    1.91
   6  -2 -19    1.59    1.80
  -6   2 -19   -1.13    1.90
  -6  -2  19    5.49    1.88
  -6   2  19   -1.13    1.66
  -6  -2 -19   -1.10    1.92
  -7  -2  19    2.95    2.07
  -7   2 -19   -3.43    1.70
  -7  -2 -19   -1.33    1.99
  -7   2  19   -0.87    1.86
   0  -2 -20    4.73    2.02
   0   2 -20    5.66    1.94
  -1   2 -20    1.86    1.77
   1  -2 -20   -3.12    1.72
  -1  -2 -20   -0.11    1.64
   1   2 -20    1.30    1.80
   2  -2 -20    7.48    2.01
  -2   2 -20    9.68    2.14
   2   2 -20    7.22    2.05
  -2  -2 -20    7.21    2.02
  -3   2 -20   -1.36    1.70
   3  -2 -20    0.51    1.71
  -3  -2 -20    3.21    1.90
   3   2 -20   -2.67    1.58
  -4   2 -20    2.79    1.87
   4  -2 -20    0.57    1.83
   4   2 -20    1.41    1.75
  -4   2  20    2.40    1.82
  -4  -2 -20    1.14    2.05
  -5   2 -20   -0.89    2.06
   5  -2 -20   -3.30    1.69
  -5   2  20   -1.85    1.82
  -5  -2 -20    1.87    1.94
  -6   2  20    3.26    2.14
  -6  -2 -20    2.42    1.98
  -7  -2  20    0.60    2.05
   0  -2 -21   -2.58    1.77
   0   2 -21   -3.13    1.77
  -1   2 -21   -2.03    1.69
   1  -2 -21   -1.32    1.70
   1   2 -21    0.12    1.71
  -1  -2 -21    2.41    1.90
   2  -2 -21    0.40    1.97
  -2   2 -21   -2.88    1.69
  -2  -2 -21    0.20    2.06
   2   2 -21   -4.73    1.43
  -3   2 -21   -0.81    1.63
   3  -2 -21   -0.41    1.95
  -3  -2 -21   -0.14    2.07
   3   2 -21    1.51    1.91
   4  -2 -21   -0.03    1.97
   4   2 -21    1.09    1.89
   5  -2 -21    1.76    1.98
  -5   2  21    1.44    1.96
   2   2 -22   -0.39    1.83
   0   3   0    0.21    0.30
   0   3   0    0.06    0.28
   0   3   0    0.23    0.28
   1  -3   0   -0.68    0.33
   1   3   0   -1.07    0.39
   1   3   0   -0.76    0.26
  -1   3   0   -0.80    0.32
  -1   3   0   -0.30    0.41
   1   3   0   -0.65    0.35
   2   3   0  135.88    2.94
  -2   3   0  138.38    2.93
  -2   3   0  140.06    2.73
  -2  -3   0  139.17    2.98
   2   3   0  139.43    2.99
   2  -3   0  139.67    2.85
  -3   3   0   -0.55    0.49
   3  -3   0   -0.31    0.57
   3   3   0    0.17    0.57
  -3   3   0    0.27    0.55
  -3  -3   0   -0.94    0.55
   4  -3   0    0.43    0.59
  -4  -3   0    0.19    0.66
  -4   3   0    0.23    0.53
   4   3   0   -1.01    0.56
  -4  -3   0    0.46    0.24
  -4   3   0    1.13    0.63
  -5  -3   0   -0.64    0.29
   5  -3   0    0.05    0.73
   5   3   0   -0.50    0.67
  -5  -3   0   -0.65    0.67
  -5   3   0    0.14    0.61
  -5   3   0   -0.30    0.58
   6  -3   0   19.35    1.41
  -6  -3   0   20.06    1.38
  -6   3   0   20.69    1.26
   6   3   0   18.24    1.37
  -6  -3   0   19.06    0.72
  -6   3   0   19.52    1.19
   7  -3   0   -0.38    0.81
   7   3   0    0.43    0.92
  -7   3   0    0.37    0.72
  -7   3   0    0.74    0.71
  -7  -3   0   -0.26    0.93
  -8  -3   0    9.73    1.34
  -8   3   0    8.05    1.02
  -8   3   0    7.12    1.12
   8  -3   0    5.29    1.24
   8   3   0    8.38    1.31
   9   3   0    0.92    1.08
  -9   3   0    0.83    1.01
   9  -3   0   -1.32    1.00
  -9  -3   0   -0.85    1.14
  -9   3   0    0.08    0.84
  10   3   0    6.84    1.52
  10  -3   0    9.80    1.71
 -10  -3   0    8.03    1.60
 -10   3   0    8.35    1.34
  11  -3   0    0.28    1.39
 -11   3   0    0.62    1.08
  11   3   0   -0.43    1.48
 -11  -3   0    2.77    1.40
 -12  -3   0    2.98    1.65
 -12   3   0    2.67    1.36
  12   3   0    1.49    1.74
  12  -3   0    2.29    1.69
 -13  -3   0    0.30    1.78
  13   3   0   -0.32    1.73
  13  -3   0    0.53    1.71
 -14  -3   0    3.26    1.96
  14   3   0   -3.29    1.63
  14  -3   0   -2.77    1.89
 -15  -3   0    3.28    2.10
   0   3  -1    0.36    0.32
   0   3   1    0.13    0.32
   0   3   1   -0.21    0.34
   0   3  -1   -0.15    0.29
   0   3   1   -0.21    0.25
   0   3  -1    0.19    0.36
  -1   3  -1  309.96    5.51
  -1   3  -1  321.61    5.86
   1   3   1  332.54    5.91
   1  -3  -1  335.88    5.63
  -1  -3   1  340.37    5.86
  -1   3  -1  316.76    5.85
   1   3   1  336.91    5.79
   1   3  -1  337.60    5.58
   1  -3   1  327.29    5.88
  -1   3   1  333.67    5.83
   1   3  -1  321.67    5.89
   1   3  -1  343.69    5.87
  -1  -3  -1  345.11    5.68
  -1   3   1  317.46    5.87
  -2   3  -1   -0.48    0.49
   2  -3  -1   -0.38    0.40
   2   3   1   -0.22    0.50
   2   3   1    0.41    0.47
  -2   3  -1    0.07    0.33
  -2  -3   1   -0.07    0.52
   2  -3   1   -0.17    0.47
  -2  -3  -1    0.31    0.32
  -2   3   1   -0.32    0.48
   2   3  -1   -0.51    0.46
  -2   3   1   -0.25    0.46
  -3   3  -1   22.08    0.85
   3   3   1   19.86    1.07
  -3   3  -1   19.98    1.02
   3  -3  -1   21.29    0.99
   3   3   1   20.01    1.06
  -3  -3   1   20.48    1.11
   3  -3   1   20.95    1.06
  -3   3   1   20.89    1.00
  -3   3   1   21.75    1.06
  -3  -3  -1   21.15    0.68
  -3  -3  -1   20.60    1.07
   3   3  -1   17.99    1.03
   4   3   1   -0.29    0.61
  -4   3  -1   -0.88    0.52
   4  -3  -1    0.45    0.63
  -4  -3   1    0.21    0.66
  -4   3  -1    0.17    0.49
  -4  -3  -1    0.12    0.35
   4  -3   1   -0.04    0.62
   4   3  -1    0.49    0.64
  -4  -3  -1   -0.87    0.58
  -4   3   1    0.20    0.58
  -4   3   1    0.37    0.60
  -5  -3   1    6.46    0.91
  -5   3  -1    7.12    0.76
   5  -3  -1    5.00    0.83
  -5   3  -1    5.04    0.78
   5   3   1    5.72    0.88
  -5   3   1    5.87    0.79
  -5  -3  -1    5.60    0.50
   5   3  -1    6.60    0.91
   5  -3   1    6.74    0.92
  -5   3   1    5.88    0.77
  -5  -3  -1    5.79    0.91
   6   3   1   -1.18    0.71
  -6   3  -1    0.53    0.66
  -6  -3   1    0.13    0.78
  -6  -3   1   -0.39    0.29
  -6   3  -1    0.85    0.67
   6  -3  -1   -0.77    0.70
  -6   3   1   -0.11    0.73
  -6   3   1    0.72    0.63
  -6  -3  -1    0.09    0.42
   6   3  -1   -0.66    0.73
  -6  -3  -1   -0.08    0.80
   6  -3   1    0.15    0.79
  -7  -3   1   62.15    2.51
  -7   3  -1   60.97    2.19
  -7   3  -1   62.02    2.23
   7  -3  -1   62.58    2.46
   7   3   1   62.29    2.55
   7  -3   1   62.25    2.56
  -7  -3  -1   61.70    1.64
   7   3  -1   58.54    2.47
  -7  -3  -1   64.34    2.48
  -7   3   1   63.51    2.40
  -7   3   1   64.84    2.19
  -8   3  -1   -0.75    0.80
   8  -3  -1   -1.14    0.83
   8   3   1   -0.10    0.93
  -8  -3   1   -0.50    1.04
  -8   3  -1   -1.16    0.77
  -8   3   1   -0.14    0.92
  -8   3   1    1.50    0.80
   8   3  -1    0.30    0.93
   8  -3   1    1.47    1.05
  -8  -3  -1    0.39    1.00
  -9   3  -1   12.68    1.29
   9  -3  -1   12.31    1.57
  -9   3  -1   11.63    1.35
  -9  -3   1   10.33    1.51
   9   3   1   10.32    1.51
  -9   3   1    9.00    1.33
  -9  -3  -1    9.94    1.44
  -9   3   1   10.03    1.18
   9  -3   1   10.95    1.54
   9   3  -1   10.60    1.50
  10   3   1   -0.16    1.20
  10  -3  -1   -0.31    1.26
 -10   3  -1   -0.34    0.97
 -10  -3   1   -1.90    1.13
 -10  -3  -1   -0.67    1.26
  10  -3   1   -0.63    1.22
  10   3  -1    0.36    1.35
 -10   3   1    0.44    1.09
  11   3   1    0.15    1.39
 -11   3  -1   -0.29    1.06
  11  -3  -1    1.76    1.47
 -11  -3   1   -0.79    1.44
 -11  -3  -1    2.98    1.47
  11   3  -1   -2.01    1.24
  11  -3   1   -0.02    1.35
 -11   3   1   -0.04    1.16
  12  -3  -1    0.08    1.60
 -12  -3   1   -0.89    1.61
  12   3   1   -0.26    1.45
 -12  -3  -1   -1.76    1.35
  12  -3   1    0.86    1.73
 -12   3   1   -1.21    1.28
  12   3  -1    0.49    1.52
  13   3   1   11.08    2.26
  13  -3  -1    7.06    2.06
 -13  -3   1    6.67    1.89
 -13  -3  -1    7.11    1.84
  13   3  -1    9.88    2.01
  13  -3   1   11.76    2.06
  14   3   1   -2.24    1.69
  14  -3  -1    0.56    1.74
 -14  -3   1   -1.06    1.68
  14   3  -1   -1.09    1.72
  14  -3   1   -1.86    1.62
 -14  -3  -1    0.33    1.81
 -15  -3   1   11.26    2.47
  15  -3  -1   10.67    2.49
   0   3   2    0.13    0.41
   0   3  -2   -0.29    0.40
   0   3   2   -0.12    0.20
   0  -3   2   -0.09    0.29
   0  -3  -2   -0.07    0.41
   0   3  -2   -0.15    0.40
   1   3   2    0.49    0.47
  -1   3  -2   -0.15    0.44
  -1  -3   2    0.31    0.43
   1   3   2    0.03    0.37
  -1   3  -2   -0.43    0.45
  -1   3   2    0.38    0.47
  -1  -3  -2   -0.04    0.38
   1  -3   2   -0.18    0.43
  -1   3   2    0.64    0.45
   1   3  -2   -0.13    0.44
   1   3  -2   -0.12    0.35
   2  -3  -2   -0.16    0.39
  -2   3  -2   -0.04    0.52
  -2   3  -2    0.18    0.27
   2   3   2   -0.36    0.50
   2   3   2    0.13    0.53
  -2  -3   2    0.05    0.58
   2   3  -2    0.05    0.51
  -2   3   2   -1.04    0.48
   2  -3   2   -0.03    0.52
  -2  -3  -2    0.06    0.42
  -2   3   2    0.83    0.52
   2   3  -2    0.19    0.31
  -3   3  -2    5.03    0.72
   3   3   2    6.83    0.78
   3  -3  -2    5.08    0.62
  -3  -3   2    5.43    0.77
  -3   3  -2    7.25    0.51
   3   3   2    6.81    0.81
   3   3  -2    5.87    0.74
   3   3  -2    6.53    0.32
   3  -3   2    7.01    0.82
  -3   3   2    6.59    0.75
  -3  -3  -2    5.90    0.53
  -3   3   2    6.76    0.75
   4  -3  -2   11.48    0.87
  -4   3  -2   12.83    0.74
  -4   3  -2   10.69    0.94
  -4  -3   2   11.48    0.99
   4   3   2   12.26    1.01
   4   3   2   14.41    1.05
  -4  -3  -2   12.27    0.68
  -4   3   2   12.66    0.96
  -4   3   2   12.20    0.91
   4   3  -2   11.83    1.00
   4  -3   2   11.57    0.98
  -4  -3  -2   13.25    1.01
   5  -3  -2    0.92    0.65
  -5  -3   2   -0.04    0.71
  -5   3  -2    0.44    0.66
  -5   3  -2    0.56    0.52
   5   3   2    0.03    0.71
  -5   3   2   -0.31    0.57
  -5  -3  -2   -0.24    0.42
  -5  -3  -2    0.35    0.66
   5   3  -2    0.21    0.66
  -5   3   2   -1.22    0.68
   5  -3   2    0.30    0.73
  -6   3  -2    4.90    0.74
   6  -3  -2    4.38    0.84
  -6  -3   2    2.69    0.95
  -6   3  -2    2.87    0.77
   6   3   2    3.92    0.94
   6   3  -2    5.62    0.95
   6  -3   2    2.72    0.90
  -6   3   2    2.85    0.74
  -6   3   2    3.99    0.92
  -6  -3  -2    4.10    0.55
  -6  -3  -2    2.63    0.84
  -7   3  -2    1.33    0.71
  -7  -3   2    0.72    0.91
  -7   3  -2   -0.92    0.70
   7  -3  -2    0.15    0.83
   7   3   2    0.30    0.84
   7  -3   2    1.46    0.95
  -7  -3  -2    0.36    0.51
  -7   3   2   -0.35    0.69
  -7  -3  -2    0.26    0.82
   7   3  -2    0.46    0.80
  -7   3   2    0.16    0.87
  -8   3  -2    1.58    0.81
  -8  -3   2    2.60    1.12
   8  -3  -2    2.78    1.07
   8   3   2    1.07    0.99
  -8   3  -2    0.10    0.80
  -8  -3  -2    0.75    1.03
   8  -3   2    0.09    1.02
  -8   3   2    2.92    0.87
   8   3  -2    1.17    0.97
  -8   3   2    2.12    1.01
  -9  -3   2    3.00    1.35
   9  -3  -2    1.18    1.00
   9   3   2    2.62    1.29
  -9   3  -2    4.19    1.03
  -9   3  -2    2.30    0.99
   9  -3   2    2.30    1.25
  -9   3   2    3.40    0.98
   9   3  -2    3.47    1.21
  -9   3   2    2.12    1.20
  -9  -3  -2    3.44    1.28
 -10  -3   2    0.57    1.28
  10   3   2    0.14    1.27
 -10   3  -2   -0.52    0.95
  10  -3  -2   -1.11    1.24
  10   3  -2    3.56    1.42
 -10  -3  -2    2.11    1.32
  10  -3   2    2.44    1.33
 -10   3   2   -0.04    1.09
  11  -3  -2   -0.62    1.37
 -11  -3   2    0.91    1.44
  11   3   2   -0.61    1.36
  11   3  -2    1.32    1.38
 -11   3   2   -0.66    1.19
 -11  -3  -2   -1.31    1.27
  11  -3   2    0.87    1.40
 -12  -3   2    1.13    1.69
  12  -3  -2   -1.51    1.54
  12   3   2   -1.65    1.40
  12  -3   2    0.24    1.52
 -12   3   2   -0.83    1.43
  12   3  -2   -1.60    1.54
 -12  -3  -2   -1.10    1.40
  13  -3  -2    3.00    1.78
  13   3   2   -0.92    1.77
 -13  -3   2    1.76    1.86
  13  -3   2   -2.69    1.69
  13   3  -2    2.59    1.69
 -13   3   2    0.09    1.60
 -13  -3  -2    0.69    1.57
 -14  -3   2    3.97    1.97
  14   3   2   -3.47    1.82
  14  -3  -2    0.40    1.68
  14  -3   2   -0.16    1.92
  14   3  -2    0.78    1.89
  15  -3  -2   -1.56    1.97
   0  -3  -3   -0.78    0.47
   0   3  -3    0.19    0.49
   0  -3   3   -0.41    0.32
   0   3  -3   -0.62    0.44
   0   3   3    0.08    0.23
   0   3   3    0.37    0.48
   1  -3  -3   20.97    0.97
  -1  -3   3   21.93    0.89
  -1   3  -3   20.62    0.98
  -1   3  -3   21.64    1.00
   1   3   3   23.28    0.80
   1   3   3   22.01    0.99
   1   3  -3   22.80    0.87
  -1  -3  -3   20.72    0.89
  -1   3   3   22.13    1.00
   1   3  -3   21.07    0.97
   1  -3   3   21.24    1.00
  -2  -3   3    0.00    0.58
   2  -3  -3    0.73    0.53
  -2   3  -3   -0.05    0.54
   2  -3  -3    0.34    0.33
   2   3   3    0.31    0.48
   2   3   3    0.22    0.54
  -2   3   3    0.30    0.51
   2  -3   3    0.69    0.57
  -2   3   3    0.62    0.55
   2   3  -3    0.74    0.40
   2   3  -3    0.34    0.52
  -2  -3  -3    0.71    0.48
   3   3   3  114.24    2.80
  -3   3  -3  115.47    2.19
   3  -3  -3  116.06    2.47
   3   3   3  116.60    2.80
  -3   3  -3  108.30    2.76
  -3  -3   3  109.17    2.80
  -3   3   3  111.05    2.76
   3   3  -3  107.94    2.80
  -3   3   3  108.86    2.77
   3   3  -3  113.12    2.20
   3  -3   3  110.76    2.86
  -3  -3  -3  113.16    2.48
   4   3   3    1.49    0.68
  -4   3  -3    1.28    0.43
   4  -3  -3    1.85    0.61
  -4   3  -3    0.87    0.62
  -4  -3   3    1.92    0.71
   4   3   3    1.96    0.70
   4  -3   3    1.20    0.70
  -4   3   3    1.09    0.72
   4   3  -3    1.42    0.30
   4   3  -3    0.34    0.63
  -4  -3  -3    1.40    0.52
  -4   3   3    1.58    0.64
  -5   3  -3   81.94    2.06
  -5   3  -3   80.50    2.42
   5   3   3   80.56    2.51
   5  -3  -3   78.79    2.32
  -5  -3   3   74.70    2.54
   5   3   3   75.20    2.54
   5   3  -3   75.80    1.63
  -5   3   3   76.93    2.48
  -5  -3  -3   78.45    2.43
   5  -3   3   79.53    2.61
  -5   3   3   76.91    2.32
   5   3  -3   79.31    2.54
  -5  -3  -3   79.51    2.04
  -6  -3   3    0.31    0.81
   6   3   3   -0.83    0.77
  -6   3  -3   -0.23    0.52
  -6   3  -3   -0.21    0.63
   6  -3  -3   -0.55    0.68
   6   3  -3   -0.38    0.26
  -6  -3  -3   -0.75    0.49
   6   3  -3   -1.42    0.72
  -6   3   3    0.44    0.64
   6  -3   3    0.03    0.85
  -6  -3  -3    0.05    0.78
  -6   3   3   -0.69    0.75
  -7  -3   3   14.43    1.44
  -7   3  -3   12.16    1.15
  -7   3  -3   12.35    1.06
   7   3   3   13.80    1.47
   7  -3  -3   14.55    1.24
   7   3  -3   14.63    1.33
  -7  -3  -3   13.00    0.89
   7  -3   3   16.03    1.47
  -7   3   3   13.35    1.38
  -7  -3  -3   16.47    1.40
  -7   3   3   16.50    1.20
  -8   3  -3    5.71    1.09
  -8   3  -3    3.96    0.86
   8   3   3    5.25    1.25
  -8  -3   3    4.96    1.21
   8  -3  -3    4.71    1.07
  -8   3   3    6.69    1.29
  -8   3   3    5.50    0.95
   8  -3   3    2.63    1.14
   8   3  -3    6.37    1.24
  -8  -3  -3    4.46    1.13
   9  -3  -3   20.08    1.68
  -9   3  -3   22.87    1.58
   9   3   3   20.93    1.97
  -9  -3   3   18.67    1.84
  -9   3  -3   23.98    1.58
  -9   3   3   20.27    1.80
   9   3  -3   21.53    1.81
  -9   3   3   22.27    1.48
   9  -3   3   20.78    1.87
  -9  -3  -3   19.43    1.69
 -10  -3   3    1.55    1.36
  10   3   3    2.22    1.32
  10  -3  -3   -2.03    1.21
 -10  -3  -3   -0.45    1.05
 -10   3   3   -0.68    1.21
  10  -3   3    2.12    1.36
  10   3  -3   -0.27    1.19
  11   3   3   18.75    2.16
 -11  -3   3   27.46    2.45
  11  -3  -3   18.58    2.02
  11  -3   3   23.49    2.27
 -11  -3  -3   22.89    2.06
 -11   3   3   23.73    2.23
  11   3  -3   21.05    2.12
 -12  -3   3   -2.13    1.46
  12  -3  -3    0.01    1.44
  12   3   3   -0.03    1.51
 -12   3   3   -3.02    1.44
  12  -3   3   -3.13    1.45
 -12  -3  -3    1.29    1.41
  12   3  -3   -0.02    1.44
 -13  -3   3    5.37    1.94
  13  -3  -3    4.33    1.86
  13   3   3    3.55    1.79
  13   3  -3    5.69    1.83
  13  -3   3    6.31    1.99
 -13   3   3    7.06    1.95
 -13  -3  -3    7.21    1.83
 -14  -3   3   -1.15    1.99
  14   3   3   -0.33    1.74
  14  -3  -3   -0.51    1.82
  14  -3   3   -1.54    1.79
 -14   3   3   -3.18    1.64
  14   3  -3    0.09    1.97
  15  -3  -3    1.69    2.28
   0   3   4   -0.13    0.28
   0  -3  -4   -0.15    0.53
   0   3  -4   -0.27    0.57
   0   3  -4    0.41    0.53
   0   3   4   -0.10    0.53
   0  -3   4    0.49    0.39
   1   3   4    0.47    0.45
  -1   3  -4   -0.44    0.53
   1   3   4   -0.01    0.55
   1  -3  -4    0.51    0.56
  -1   3  -4   -0.45    0.55
  -1  -3   4    0.09    0.49
  -1   3   4    0.49    0.56
   1  -3   4    0.35    0.55
   1   3  -4    0.69    0.52
   1   3  -4    0.26    0.51
   1  -3   4    0.02    0.24
  -1  -3  -4   -0.35    0.51
   2  -3  -4   31.06    1.29
  -2  -3   4   28.13    1.20
   2   3   4   30.16    1.16
  -2   3  -4   27.57    1.26
   2   3   4   28.39    1.26
   2  -3  -4   29.16    0.81
  -2  -3  -4   30.01    1.19
   2   3  -4   28.21    1.24
   2  -3   4   28.67    1.27
  -2   3   4   29.83    1.29
   2   3  -4   30.59    1.06
  -3   3  -4    5.39    0.37
   3   3   4    5.62    0.73
  -3   3  -4    4.33    0.75
   3   3   4    4.62    0.71
   3  -3  -4    5.67    0.54
   3  -3  -4    4.38    0.68
  -3  -3   4    4.03    0.74
  -3   3   4    4.30    0.75
   3   3  -4    5.15    0.52
   3  -3   4    4.48    0.81
  -3  -3  -4    4.97    0.66
   3   3  -4    4.92    0.73
  -3   3   4    5.61    0.75
   4  -3  -4    5.89    0.80
   4   3   4    6.56    0.86
   4  -3  -4    6.59    0.67
   4   3   4    6.08    0.91
  -4   3  -4    5.83    0.81
  -4   3  -4    6.31    0.50
  -4  -3   4    6.56    0.91
   4  -3   4    5.78    0.87
   4   3  -4    7.11    0.90
  -4  -3  -4    4.83    0.66
   4   3  -4    5.34    0.47
  -4   3   4    7.45    0.91
  -4   3   4    5.82    0.78
  -5  -3   4    2.66    0.85
   5   3   4    2.09    0.81
   5  -3  -4    1.44    0.59
  -5   3  -4    1.68    0.48
   5  -3  -4    1.69    0.68
  -5   3  -4    1.52    0.69
   5   3   4    2.24    0.75
  -5   3   4    0.79    0.76
  -5  -3  -4    0.60    0.58
   5  -3   4    1.69    0.83
  -5   3   4   -0.26    0.63
   5   3  -4    2.58    0.40
   5   3  -4    1.19    0.78
   6  -3  -4   24.25    1.31
   6   3   4   24.52    1.59
  -6   3  -4   26.05    1.17
   6  -3  -4   26.89    1.40
  -6  -3   4   26.64    1.66
   6   3   4   22.34    1.47
  -6   3  -4   21.06    1.38
   6   3  -4   23.40    0.85
  -6  -3  -4   24.42    1.47
   6  -3   4   24.57    1.64
  -6   3   4   24.93    1.57
  -6   3   4   26.74    1.41
  -6  -3  -4   25.15    1.22
   6   3  -4   23.19    1.48
   7   3   4   -0.92    0.87
  -7   3  -4    0.90    0.61
  -7  -3   4    0.41    0.93
   7  -3  -4   -1.03    0.70
  -7   3  -4   -1.40    0.72
  -7  -3  -4   -0.84    0.79
   7   3  -4    1.21    0.94
   7  -3   4    0.05    0.88
  -7  -3  -4    0.33    0.63
  -7   3   4    0.73    0.99
  -7   3   4    0.94    0.65
  -8  -3   4    3.36    1.15
   8  -3  -4    4.17    0.82
   8   3   4    4.51    1.21
  -8   3  -4    2.43    0.90
   8  -3  -4    5.70    1.09
  -8   3  -4    4.70    0.89
  -8   3   4    5.30    0.92
   8  -3   4    4.67    1.28
  -8  -3  -4    3.31    1.05
  -8   3   4    3.05    1.11
   8   3  -4    3.74    1.09
   9  -3  -4    7.10    1.31
   9   3   4    5.81    1.40
  -9  -3   4    4.07    1.40
  -9   3  -4    5.81    1.15
  -9   3   4    6.72    1.40
   9   3  -4    7.13    1.37
   9  -3   4    6.66    1.46
  -9  -3  -4    6.74    1.23
  -9   3   4    7.17    1.07
  10  -3  -4    6.35    1.49
  10   3   4    8.23    1.59
 -10  -3   4    9.12    1.70
 -10   3  -4    7.43    1.33
  10   3  -4    9.12    1.72
 -10  -3  -4    8.59    1.47
 -10   3   4   10.54    1.74
  10  -3   4    6.72    1.61
 -11  -3   4    1.68    1.49
  11   3   4    0.51    1.42
  11  -3  -4    1.78    1.39
 -11   3   4   -1.28    1.30
 -11  -3  -4    0.12    1.28
  11  -3   4    2.98    1.58
  11   3  -4    0.02    1.39
  12  -3  -4    2.53    1.58
  12   3   4    2.31    1.76
 -12  -3   4    3.56    1.74
  12   3  -4    4.46    1.75
 -12   3   4    2.91    1.74
 -12  -3  -4    3.15    1.47
  12  -3   4    2.78    1.64
  13   3   4    1.81    1.90
 -13  -3   4   -1.13    1.76
  13  -3  -4   -1.08    1.62
 -13   3   4   -0.28    1.65
  13   3  -4    0.70    1.56
  13  -3   4    1.03    1.94
  14   3   4    3.66    1.93
 -14  -3   4   -0.13    1.84
  14  -3   4    4.79    2.28
 -14   3   4    2.11    2.02
  14   3  -4   -0.34    1.87
   0   3  -5    0.58    0.63
   0   3   5   -0.32    0.32
   0  -3   5   -0.13    0.41
   0  -3  -5   -0.28    0.57
   0   3  -5    0.05    0.54
   0   3   5   -0.37    0.55
  -1  -3   5   60.17    1.68
  -1   3  -5   63.68    1.91
   1   3   5   63.05    1.56
   1  -3  -5   59.25    1.85
  -1   3  -5   60.02    1.90
   1   3   5   58.30    1.84
  -1   3   5   56.35    1.84
   1   3  -5   63.00    1.79
  -1  -3  -5   59.54    1.82
   1  -3   5   60.73    1.90
  -1   3   5   50.71    1.15
   1  -3   5   59.72    1.31
   1   3  -5   57.20    1.81
   2   3   5    8.08    0.84
   2  -3  -5    7.67    0.87
  -2  -3   5    8.72    0.84
   2  -3  -5    7.46    0.46
   2   3   5    8.76    0.76
  -2   3  -5    8.29    0.91
  -2   3   5    7.28    0.84
  -2  -3  -5    8.97    0.80
   2  -3   5    6.51    0.80
   2   3  -5   10.22    0.76
   2   3  -5    8.92    0.82
  -3  -3   5  206.48    4.54
   3   3   5  206.55    4.43
  -3   3  -5  207.12    4.59
   3   3   5  209.09    4.47
  -3   3  -5  209.09    3.60
   3  -3  -5  203.68    4.45
   3  -3  -5  204.93    3.91
  -3  -3  -5  201.88    4.31
   3   3  -5  213.10    4.09
  -3   3   5  199.54    4.55
   3   3  -5  195.86    4.44
   3  -3   5  202.33    4.59
  -4  -3   5    1.98    0.85
   4  -3  -5    1.90    0.73
   4   3   5    2.31    0.74
   4  -3  -5    2.36    0.56
   4   3   5    0.72    0.68
  -4   3  -5    1.35    0.73
  -4   3  -5    2.11    0.38
  -4   3   5    1.37    0.76
  -4  -3  -5    2.10    0.69
   4   3  -5    3.32    0.79
   4  -3   5    2.05    0.79
   4   3  -5    2.42    0.49
   5  -3  -5   68.61    2.09
   5   3   5   66.35    2.29
  -5  -3   5   71.32    2.55
   5   3   5   72.11    2.52
  -5   3  -5   70.05    1.80
   5  -3  -5   71.89    2.28
  -5   3  -5   69.08    2.36
   5  -3   5   67.42    2.51
   5   3  -5   72.20    2.47
  -5   3   5   70.31    2.49
   5   3  -5   70.22    1.79
  -5  -3  -5   70.02    2.14
   6  -3  -5    0.15    0.61
  -6  -3   5   -0.45    0.86
   6   3   5    0.58    0.82
   6  -3  -5    0.10    0.62
  -6   3  -5    0.90    0.50
  -6   3  -5   -0.18    0.66
   6   3   5   -0.13    0.73
  -6  -3  -5   -0.03    0.63
  -6   3   5    0.89    0.90
   6  -3   5    0.24    0.88
   6   3  -5   -0.39    0.68
   6   3  -5    0.11    0.39
  -6  -3  -5   -0.17    0.70
  -6   3   5    0.67    0.74
  -7   3  -5    1.42    0.87
  -7   3  -5    1.08    0.59
   7   3   5    2.21    1.00
   7  -3  -5    2.53    0.79
   7  -3  -5    2.05    0.84
  -7  -3   5    2.00    1.05
   7  -3   5    1.71    1.03
  -7   3   5    0.67    0.97
  -7  -3  -5    1.31    0.82
  -7  -3  -5    1.23    0.70
   7   3  -5    2.33    0.98
  -7   3   5    2.46    0.77
   8   3   5   -0.19    1.12
   8  -3  -5    0.22    0.86
  -8   3  -5    0.96    0.93
  -8  -3   5    0.22    1.10
   8  -3  -5    1.25    0.79
   8   3  -5    1.86    1.11
   8  -3   5    1.63    1.15
  -8   3   5    0.01    0.79
  -8  -3  -5    0.22    0.92
  -8   3   5    1.08    1.15
   9   3   5   19.59    1.95
  -9  -3   5   23.90    2.11
  -9   3  -5   21.82    1.66
   9  -3  -5   19.87    1.69
  -9  -3  -5   23.70    1.76
   9   3  -5   23.28    1.95
  -9   3   5   24.38    2.01
   9  -3   5   18.80    1.93
 -10   3  -5    2.51    1.16
 -10  -3   5    0.68    1.51
  10   3   5    2.94    1.43
  10  -3  -5    3.01    1.27
  10   3  -5    0.91    1.24
 -10  -3  -5   -0.52    1.08
 -10   3   5    4.40    1.59
  10  -3   5   -1.77    1.35
  11  -3  -5   46.73    2.71
  11   3   5   44.41    2.92
 -11  -3   5   47.49    3.02
 -11  -3  -5   44.01    2.57
 -11   3   5   45.00    2.97
  11  -3   5   47.00    3.18
  11   3  -5   48.17    2.94
 -12  -3   5   -1.06    1.63
  12  -3  -5    0.06    1.49
  12   3   5   -2.02    1.46
  12   3  -5   -0.09    1.59
 -12   3   5   -2.59    1.48
  12  -3   5    1.82    1.69
  13   3   5    6.26    2.13
 -13  -3   5    6.79    2.04
  13   3  -5    8.15    2.07
 -13   3   5    4.00    1.90
  13  -3   5    8.28    2.10
  14   3   5   -1.04    1.71
 -14  -3   5   -3.75    1.88
  14   3  -5    2.69    1.86
  14  -3   5   -1.09    2.04
 -14   3   5   -3.18    1.86
   0   3   6   -0.90    0.56
   0   3  -6   -0.87    0.59
   0  -3  -6    1.35    0.65
   0   3  -6   -0.34    0.57
   0   3   6   -0.23    0.32
   0  -3   6   -0.48    0.42
  -1   3  -6    3.96    0.77
   1  -3  -6    5.34    0.78
  -1  -3   6    2.95    0.60
   1   3   6    3.57    0.73
  -1   3  -6    4.59    0.77
   1   3   6    4.96    0.56
   1   3  -6    3.44    0.69
   1  -3   6    3.68    0.73
   1  -3   6    4.46    0.46
  -1  -3  -6    3.64    0.73
  -1   3   6    4.15    0.75
  -1   3   6    4.41    0.36
   1   3  -6    4.50    0.69
   2  -3  -6   18.53    0.68
   2   3   6   15.28    1.07
  -2   3  -6   20.83    1.24
  -2  -3   6   18.77    1.07
   2   3   6   20.73    1.03
   2  -3  -6   16.92    1.11
   2  -3   6   18.28    1.15
   2  -3   6   18.34    0.65
   2   3  -6   18.07    1.11
   2   3  -6   18.76    1.04
  -2  -3  -6   19.56    1.15
  -2   3   6   19.21    1.18
  -3  -3   6   31.76    1.48
   3  -3  -6   30.43    1.02
   3   3   6   29.05    1.38
  -3   3  -6   29.69    1.50
   3   3   6   28.90    1.40
   3  -3  -6   29.61    1.46
  -3  -3  -6   30.06    1.41
   3   3  -6   31.00    1.24
   3  -3   6   29.87    1.51
   3   3  -6   29.02    1.43
   3  -3   6   30.80    0.85
  -3   3   6   29.05    1.50
   4   3   6    5.61    0.84
   4   3   6    4.48    0.90
  -4   3  -6    5.43    0.91
  -4   3  -6    4.22    0.43
  -4  -3   6    3.88    0.92
   4  -3  -6    4.99    0.89
   4  -3  -6    4.02    0.60
   4   3  -6    3.67    0.60
   4  -3   6    5.93    0.96
   4   3  -6    4.21    0.78
  -4   3   6    3.36    0.86
  -4  -3  -6    3.87    0.79
   5  -3  -6    0.75    0.56
  -5  -3   6   -0.71    0.78
   5   3   6   -1.29    0.57
   5   3   6    0.07    0.80
   5  -3  -6    0.66    0.70
  -5   3  -6    0.76    0.76
  -5   3  -6    0.20    0.39
  -5  -3  -6   -0.51    0.62
   5   3  -6   -0.30    0.43
   5   3  -6   -0.42    0.70
   5  -3   6   -0.19    0.81
  -5   3   6    0.41    0.80
   6  -3  -6   21.60    1.25
  -6   3  -6   20.63    1.01
  -6   3  -6   23.16    1.50
   6   3   6   20.32    1.54
  -6  -3   6   16.56    1.47
   6  -3  -6   20.50    1.35
   6   3   6   23.37    1.44
   6  -3   6   20.30    1.57
  -6   3   6   22.05    1.58
  -6  -3  -6   22.05    1.30
   6   3  -6   18.55    0.95
   6   3  -6   20.30    1.43
   7  -3  -6    1.98    0.83
  -7  -3   6    2.08    1.06
   7   3   6    0.39    1.05
  -7   3  -6    1.70    0.90
   7  -3  -6    1.25    0.78
   7   3   6    0.00    0.88
  -7   3   6    1.55    1.06
   7   3  -6    2.69    1.02
   7  -3   6    1.58    1.05
  -7  -3  -6    3.34    0.87
  -7  -3  -6    0.57    0.80
  -8  -3   6    2.73    1.25
   8   3   6    0.43    1.20
  -8   3  -6    3.74    1.13
   8  -3  -6    1.46    0.91
   8  -3  -6    3.01    0.89
   8  -3   6    1.33    1.13
  -8   3   6    3.43    1.28
  -8  -3  -6    1.11    0.86
  -8  -3  -6    2.45    0.98
   8   3  -6    0.93    1.07
   9   3   6    2.38    1.30
   9  -3  -6    1.44    1.06
  -9   3  -6    2.59    1.14
  -9  -3   6    2.42    1.35
   9   3  -6    1.08    1.24
   9  -3   6    0.55    1.31
  -9  -3  -6    0.53    0.97
  -9   3   6   -0.80    1.22
  10  -3  -6   -0.12    1.14
 -10   3  -6    1.00    1.20
 -10  -3   6   -0.82    1.54
  10   3   6   -0.09    1.38
 -10  -3  -6   -0.81    1.07
  10   3  -6    1.95    1.27
  10  -3   6    2.28    1.56
 -10   3   6    0.05    1.41
  11  -3  -6    1.56    1.33
  11   3   6   -1.06    1.59
 -11  -3   6    2.31    1.62
  11  -3   6    2.08    1.75
  11   3  -6    0.07    1.30
 -11   3   6    0.52    1.51
 -12  -3   6    4.68    1.94
  12   3   6    6.04    1.88
  12  -3   6    6.07    1.92
 -12   3   6    7.18    2.09
  12   3  -6    6.41    1.80
 -13  -3   6    1.14    1.85
  13   3   6    0.68    1.66
  13   3  -6   -0.83    1.68
  13  -3   6    1.87    2.03
 -13   3   6   -1.17    1.71
 -14  -3   6    0.66    2.03
 -14   3   6    2.23    2.09
  14   3  -6    0.58    1.71
   0   3  -7    0.02    0.65
   0  -3   7    0.00    0.47
   0  -3  -7   -0.19    0.65
   0   3   7    0.09    0.36
   0   3   7    0.85    0.70
   0   3  -7    0.68    0.69
   1   3   7   23.84    0.99
   1  -3  -7   24.30    1.34
  -1   3  -7   23.56    1.34
   1   3   7   22.90    1.27
  -1  -3   7   23.74    1.12
  -1   3   7   24.00    0.79
   1  -3   7   22.64    0.90
   1  -3   7   22.60    1.27
  -1   3   7   24.62    1.33
   1   3  -7   21.56    1.20
   1   3  -7   24.38    1.27
  -1  -3  -7   24.13    1.31
  -2   3  -7   13.76    1.14
   2   3   7   14.32    0.91
  -2  -3   7   14.20    1.03
   2  -3  -7   13.87    1.10
   2   3   7   14.80    1.08
   2  -3  -7   13.66    0.65
   2  -3   7   14.01    0.66
   2   3  -7   14.65    1.04
  -2   3   7   14.16    1.12
   2   3  -7   14.12    1.02
  -2  -3  -7   12.49    1.10
   2  -3   7   13.57    1.07
  -3   3  -7   51.07    2.04
  -3  -3   7   54.58    2.02
   3  -3  -7   53.56    2.01
   3  -3  -7   50.66    1.42
   3   3   7   52.14    1.85
   3   3   7   48.03    1.86
  -3  -3  -7   49.16    1.92
   3  -3   7   48.50    1.25
   3  -3   7   51.38    2.05
   3   3  -7   48.13    1.90
   3   3  -7   52.28    1.75
  -3   3   7   48.64    2.01
   4   3   7   13.71    1.10
  -4   3  -7   13.44    1.20
   4  -3  -7   15.32    0.89
  -4  -3   7   16.77    1.29
  -4   3  -7   15.34    0.67
   4  -3  -7   14.36    1.22
   4   3   7   15.97    1.21
   4  -3   7   15.37    1.29
  -4   3   7   15.87    1.30
   4   3  -7   14.69    1.14
  -4  -3  -7   15.40    1.15
   4   3  -7   17.27    1.02
   5   3   7   44.63    1.90
   5  -3  -7   43.15    1.58
  -5   3  -7   43.12    2.01
   5  -3  -7   43.75    1.89
  -5   3  -7   38.66    1.26
   5   3   7   43.96    2.01
  -5  -3   7   44.25    2.10
  -5   3   7   42.34    2.06
   5  -3   7   43.29    2.07
  -5  -3  -7   40.91    1.81
   5   3  -7   42.16    1.54
   5   3  -7   41.72    1.91
  -6  -3   7    2.35    1.04
   6  -3  -7    0.53    0.69
   6  -3  -7    2.03    0.83
   6   3   7    0.22    0.76
   6   3   7    2.46    0.95
  -6   3  -7    0.15    0.80
   6   3  -7    0.86    0.79
  -6  -3  -7    2.10    0.83
  -6   3   7    0.43    0.93
   6  -3   7    2.08    1.00
   6   3  -7    1.24    0.56
   7   3   7   46.51    2.43
   7  -3  -7   45.48    2.03
   7   3   7   42.94    2.11
  -7   3  -7   45.70    2.24
  -7  -3   7   44.23    2.41
   7  -3  -7   44.44    1.96
  -7  -3  -7   46.97    2.03
  -7   3   7   44.51    2.37
   7  -3   7   41.71    2.39
   7   3  -7   48.94    2.33
  -7  -3  -7   48.91    2.11
   8  -3  -7    0.10    0.82
  -8  -3   7   -0.20    1.19
   8  -3  -7    0.28    0.91
   8   3   7    1.25    1.18
  -8   3  -7   -0.08    0.98
  -8   3   7   -0.33    1.12
   8   3  -7   -1.00    0.92
   8  -3   7    0.17    1.17
  -8  -3  -7    0.38    0.87
  -8  -3  -7   -0.64    0.83
   9   3   7   28.64    2.24
   9  -3  -7   27.55    1.86
  -9  -3   7   24.58    2.21
  -9   3  -7   26.24    1.97
  -9  -3  -7   27.63    1.93
   9  -3   7   23.07    2.15
   9   3  -7   26.83    2.03
  -9   3   7   25.17    2.16
 -10  -3   7    0.37    1.59
 -10   3  -7    1.38    1.16
  10   3   7   -0.98    1.29
  10   3  -7   -2.50    1.25
  10  -3   7   -1.14    1.41
 -10   3   7   -0.12    1.41
 -11  -3   7   11.18    2.02
  11   3   7   14.31    2.09
 -11   3   7   11.88    2.16
  11  -3   7   13.34    2.07
  11   3  -7   12.80    1.93
  12   3   7    2.63    1.81
 -12  -3   7   -0.93    1.62
 -12   3   7    0.09    1.77
  12   3  -7   -0.21    1.52
  12  -3   7   -1.76    1.82
  13   3   7    3.90    1.93
 -13  -3   7    7.44    2.27
  13   3  -7    1.71    1.75
 -13   3   7    4.99    1.99
  13  -3   7    3.04    1.86
 -14   3   7    0.18    2.01
  14   3  -7   -1.12    1.77
   0   3  -8    0.00    0.70
   0   3   8    0.04    0.65
   0  -3  -8   -0.55    0.72
   0   3  -8    0.53    0.62
   0   3   8    0.31    0.37
   0  -3   8   -0.63    0.50
  -1   3  -8    0.74    0.76
   1   3   8    0.89    0.70
   1   3   8    1.39    0.50
   1  -3  -8    2.57    0.84
  -1  -3   8    2.06    0.67
   1  -3   8    2.06    0.52
   1   3  -8    1.48    0.73
   1  -3   8    1.35    0.75
  -1   3   8    1.70    0.37
  -1   3   8    2.18    0.74
  -1  -3  -8    1.88    0.80
   1   3  -8    0.74    0.66
   2   3   8   16.25    1.17
   2  -3  -8   18.00    0.79
  -2  -3   8   17.15    1.12
   2   3   8   17.92    1.05
   2  -3  -8   18.55    1.31
  -2   3  -8   19.71    1.38
   2   3  -8   18.56    1.22
   2  -3   8   18.46    0.81
   2   3  -8   19.00    1.23
  -2   3   8   20.23    1.36
   2  -3   8   17.20    1.22
  -2  -3  -8   19.71    1.36
  -3   3  -8   20.97    1.47
  -3  -3   8   18.20    1.27
   3   3   8   17.43    1.21
   3  -3  -8   19.93    0.88
   3  -3  -8   20.75    1.37
   3   3   8   22.19    1.25
   3   3  -8   20.49    1.21
   3  -3   8   19.73    0.80
  -3  -3  -8   18.49    1.29
  -3   3   8   19.08    1.38
   3  -3   8   20.41    1.40
   3   3  -8   20.38    1.27
  -4   3  -8    0.42    0.79
   4  -3  -8    0.61    0.80
   4  -3  -8    0.41    0.49
  -4  -3   8    2.62    0.92
   4   3   8    0.32    0.74
   4   3   8    0.60    0.71
   4  -3   8    0.29    0.77
  -4   3   8    1.89    0.88
   4  -3   8    1.47    0.43
   4   3  -8   -0.32    0.70
   4   3  -8    0.90    0.64
  -4  -3  -8   -1.19    0.76
   5  -3  -8   -0.39    0.53
   5   3   8    0.00    0.79
  -5   3  -8    0.08    0.82
  -5  -3   8    0.45    0.89
   5  -3  -8   -0.01    0.80
   5   3   8    0.17    0.72
   5  -3   8   -0.11    0.86
  -5   3   8    0.13    0.83
   5   3  -8   -0.68    0.62
   5   3  -8    0.17    0.60
  -5  -3  -8   -0.25    0.81
   6  -3  -8    0.82    0.68
  -6   3  -8    2.50    1.03
  -6  -3   8    1.11    1.04
   6   3   8    0.57    0.79
   6   3   8    2.93    1.08
   6  -3  -8    1.66    0.87
   6   3  -8    1.51    0.91
   6  -3   8    0.90    0.97
   6   3  -8    3.32    0.72
  -6  -3  -8    2.50    0.95
  -6   3   8    2.20    1.03
  -7   3  -8    1.70    1.07
   7   3   8    0.19    0.92
   7  -3  -8   -0.17    0.77
   7  -3  -8    0.03    0.86
   7   3   8    1.17    1.17
  -7  -3   8    1.29    1.17
   7   3  -8    0.33    1.00
  -7   3   8    1.61    1.15
  -7  -3  -8   -0.39    0.84
  -7  -3  -8    1.92    0.99
   7  -3   8   -0.26    1.02
   8   3   8   10.59    1.58
   8  -3  -8   10.08    1.25
  -8   3  -8    9.23    1.34
  -8  -3   8   11.08    1.69
  -8   3   8    8.26    1.62
  -8  -3  -8   11.85    1.27
   8  -3   8    9.61    1.65
   8   3  -8    7.93    1.41
  -8  -3  -8    8.57    1.31
  -9  -3   8   -0.05    1.37
   9   3   8    0.26    1.19
  -9   3  -8    1.75    1.23
   9   3  -8   -0.26    1.11
   9  -3   8    1.01    1.33
  -9   3   8    1.22    1.36
  10   3   8   11.85    1.97
 -10  -3   8   13.23    2.00
 -10   3  -8   15.06    1.76
  10   3  -8   14.38    1.84
  10  -3   8   15.03    2.07
 -10   3   8   15.75    2.03
  11   3   8    1.23    1.54
 -11  -3   8    4.25    1.83
  11  -3   8    2.90    1.75
  11   3  -8    2.50    1.48
 -11   3   8    3.18    1.69
 -12  -3   8    1.28    1.75
  12   3   8    0.87    1.73
  12  -3   8   -3.21    1.84
  12   3  -8    1.14    1.64
 -12   3   8    0.50    1.77
  13   3   8   -1.16    1.65
 -13  -3   8    1.17    1.91
  13   3  -8   -0.20    1.70
 -13   3   8   -1.19    1.88
  13  -3   8   -0.99    1.71
   0  -3   9    0.46    0.56
   0  -3   9   -0.53    0.68
   0  -3  -9    2.17    0.87
   0   3  -9    0.29    0.71
   0   3  -9   -0.57    0.76
  -1   3  -9  120.33    3.49
  -1  -3   9  118.65    3.05
   1  -3  -9  119.68    3.43
   1   3   9  123.16    2.88
   1   3   9  120.35    3.29
  -1  -3  -9  123.18    3.49
  -1   3   9  121.25    2.62
   1   3  -9  117.93    3.25
   1  -3   9  120.17    3.35
   1   3  -9  120.54    3.37
   1  -3   9  120.67    2.80
  -1   3   9  117.85    3.36
   2  -3  -9    1.36    0.84
  -2  -3   9    1.74    0.74
   2   3   9    1.64    0.57
  -2   3  -9    1.05    0.86
   2   3   9    1.37    0.75
   2  -3  -9    1.65    0.43
   2  -3   9    1.87    0.49
   2   3  -9    0.63    0.69
   2   3  -9    0.95    0.78
   2  -3   9    1.03    0.74
  -2   3   9    1.03    0.81
  -2  -3  -9    0.56    0.87
  -3  -3   9    6.39    0.96
  -3   3  -9    6.14    1.04
   3  -3  -9    7.05    0.62
   3  -3  -9    7.64    1.07
   3   3   9    7.89    0.98
   3   3   9    8.34    0.89
   3   3  -9    6.87    0.91
   3  -3   9    5.76    0.57
  -3  -3  -9    6.12    1.01
   3   3  -9    6.31    0.89
   3  -3   9    7.13    1.08
  -3   3   9    5.78    1.01
   4  -3  -9    2.01    0.95
   4   3   9    1.39    0.79
   4   3   9    0.86    0.75
  -4  -3   9   -0.91    0.82
  -4   3  -9    0.62    0.86
   4  -3  -9    0.57    0.50
   4  -3   9    0.32    0.93
  -4  -3  -9   -0.54    0.85
  -4   3   9    0.00    0.87
   4   3  -9    0.80    0.74
   4   3  -9    0.99    0.70
   5   3   9   13.32    1.34
   5  -3  -9   14.98    1.00
  -5   3  -9   15.50    1.42
   5   3   9   12.22    1.17
   5  -3  -9   12.12    1.30
  -5  -3   9   13.80    1.39
  -5  -3  -9   13.42    1.34
   5   3  -9   13.50    1.25
  -5   3   9   11.16    1.39
   5   3  -9   12.82    1.07
   5  -3   9   14.58    1.46
  -6  -3   9    1.41    1.10
  -6   3  -9    1.87    1.02
   6   3   9    1.89    0.89
   6   3   9    2.46    1.14
   6  -3  -9    0.37    0.90
   6   3  -9    1.58    0.96
  -6   3   9    1.94    1.11
   6  -3   9    2.08    1.08
  -6  -3  -9    3.76    1.07
   7   3   9   41.60    2.42
   7   3   9   44.00    2.14
   7  -3  -9   46.51    2.18
  -7  -3   9   46.10    2.56
  -7   3  -9   42.90    2.30
  -7  -3  -9   44.51    2.24
   7  -3   9   44.17    2.57
  -7   3   9   44.36    2.53
   7   3  -9   44.44    2.30
  -8   3  -9   -0.58    1.01
   8   3   9    1.46    1.10
  -8  -3   9   -1.65    1.23
   8   3   9   -0.32    1.35
   8  -3  -9   -0.75    0.90
  -8   3   9   -0.91    1.21
  -8  -3  -9    0.90    0.93
  -8  -3  -9   -0.44    1.11
   8   3  -9   -0.97    0.97
   8  -3   9    0.61    1.36
  -9  -3   9   12.45    2.03
   9   3   9   11.32    1.77
  -9   3  -9   11.94    1.62
  -9   3   9   10.66    1.82
   9  -3   9   12.67    1.88
   9   3  -9   14.60    1.70
 -10  -3   9   -1.24    1.43
 -10   3  -9   -1.62    1.23
  10   3   9   -0.47    1.39
 -10   3   9    0.71    1.49
  10   3  -9   -0.35    1.32
  10  -3   9    2.26    1.73
  11   3   9    1.96    1.61
 -11  -3   9   -0.57    1.62
  11   3  -9   -0.71    1.36
 -11   3   9    0.44    1.63
  11  -3   9    0.93    1.62
  12   3   9   -2.69    1.56
 -12  -3   9    2.27    1.85
 -12   3   9   -1.02    1.87
  12  -3   9   -0.67    1.81
  12   3  -9    1.30    1.50
  13   3   9    3.26    1.86
 -13  -3   9    5.12    2.12
  13  -3   9    3.70    2.05
 -13   3   9    2.64    2.15
   0   3 -10   -1.00    0.65
   0   3 -10   -0.18    0.79
   0   3  10   -0.69    0.40
   0   3  10   -0.72    0.70
   0  -3 -10    0.94    0.89
   0  -3  10    1.30    0.77
   0  -3  10   -0.13    0.58
  -1   3 -10    0.36    0.86
  -1  -3  10    1.06    0.70
   1  -3 -10    0.52    0.86
   1   3  10    0.22    0.74
   1   3  10   -0.70    0.46
   1   3 -10    0.02    0.69
   1   3 -10   -0.78    0.77
  -1   3  10   -0.31    0.38
   1  -3  10    0.19    0.71
  -1  -3 -10   -1.29    0.80
   1  -3  10    0.70    0.56
  -1   3  10   -0.08    0.75
  -2  -3  10   30.37    1.59
   2   3  10   29.95    1.63
   2   3  10   32.39    1.44
   2  -3 -10   29.36    1.75
   2  -3 -10   28.52    1.12
  -2   3 -10   30.93    1.83
  -2  -3 -10   32.51    1.83
   2  -3  10   30.76    1.22
  -2   3  10   30.00    1.72
  -2   3  10   29.94    1.12
   2  -3  10   29.85    1.69
   2   3 -10   32.23    1.73
   2   3 -10   31.61    1.62
   3   3  10   -0.03    0.61
   3  -3 -10    0.52    0.44
   3  -3 -10    2.06    1.00
  -3  -3  10   -0.29    0.72
   3   3  10    0.18    0.70
  -3   3 -10   -0.65    0.86
   3   3 -10   -0.69    0.67
   3  -3  10   -0.51    0.77
   3   3 -10    1.41    0.79
  -3   3  10    1.18    0.89
  -3  -3 -10   -0.40    0.81
  -4   3 -10   -0.04    0.98
  -4  -3  10   -0.36    0.93
   4   3  10    0.78    0.76
   4  -3 -10    1.05    0.93
   4   3  10   -0.20    0.82
   4   3 -10   -0.78    0.71
  -4   3  10    0.68    1.02
   4  -3  10    0.77    0.92
   4   3 -10    0.92    0.75
  -4  -3 -10    0.20    0.90
   5   3  10    1.78    0.98
  -5   3 -10    0.79    1.01
   5  -3 -10    1.73    1.02
  -5  -3  10   -0.05    0.96
   5   3  10   -0.66    0.78
  -5   3  10    1.87    1.07
   5  -3  10    0.72    1.00
   5   3 -10    0.46    0.74
  -5  -3 -10    0.30    1.01
   5   3 -10   -0.16    0.81
   6   3  10    4.88    1.16
  -6  -3  10    2.84    1.27
   6   3  10    2.22    1.03
   6  -3 -10    4.42    1.13
  -6   3 -10    4.72    1.30
  -6   3  10    4.06    1.29
   6  -3  10    4.07    1.27
   6   3 -10    4.40    1.07
  -6  -3 -10    2.39    1.18
   7   3  10    1.80    1.07
   7   3  10    0.49    1.21
  -7   3 -10    2.93    1.29
  -7  -3  10    1.22    1.31
   7  -3 -10   -0.66    0.98
   7   3 -10    0.85    1.06
   7  -3  10    2.34    1.30
  -7   3  10    1.78    1.26
  -7  -3 -10    2.76    1.19
  -8   3 -10   15.72    1.73
   8   3  10   18.46    1.92
   8  -3 -10   16.02    1.54
  -8  -3  10   19.61    2.08
   8  -3  10   15.18    1.92
   8   3 -10   19.69    1.82
  -8  -3 -10   19.11    1.72
  -8   3  10   16.31    1.98
  -9   3 -10    1.32    1.33
   9   3  10    0.11    1.32
  -9  -3  10   -2.59    1.42
   9  -3  10    0.28    1.44
  -9   3  10    0.28    1.40
   9   3 -10   -1.17    1.18
 -10   3 -10    9.89    1.74
  10   3  10    7.67    1.77
 -10  -3  10    8.41    1.96
 -10   3  10    7.62    1.99
  10   3 -10   10.30    1.74
  10  -3  10    8.73    1.93
 -11  -3  10    1.23    1.77
  11   3  10    0.45    1.70
 -11   3  10   -3.40    1.69
  11  -3  10   -2.88    1.61
  11   3 -10   -0.96    1.43
 -12  -3  10    1.35    1.83
  12   3  10    1.98    1.95
 -12   3  10    1.22    1.91
  12  -3  10   -1.15    1.73
   0  -3  11    0.14    0.73
   0   3  11    0.46    0.48
   0   3 -11    1.42    0.80
   0   3 -11   -0.16    0.91
   0   3  11   -0.46    0.82
   0  -3  11    0.02    0.69
   0  -3 -11    0.38    0.91
   1   3  11   48.99    1.73
  -1   3 -11   48.13    2.31
  -1  -3  11   46.53    1.91
   1   3  11   45.82    2.05
   1  -3  11   49.28    2.14
   1  -3  11   48.81    1.73
  -1  -3 -11   45.77    2.25
  -1   3  11   47.55    2.15
   1   3 -11   43.83    2.13
   1   3 -11   46.85    2.03
  -2  -3  11    1.34    0.85
   2   3  11    2.30    0.66
  -2   3 -11    2.62    1.01
   2  -3 -11    1.62    1.03
   2   3  11    2.80    0.92
  -2  -3 -11    3.81    1.12
   2  -3  11    1.97    0.61
   2   3 -11    0.98    0.88
   2  -3  11    2.60    0.88
  -2   3  11    3.05    0.97
   2   3 -11    0.83    0.73
   3   3  11    8.28    1.07
  -3  -3  11    8.80    1.18
   3  -3 -11    5.72    1.18
  -3   3 -11    9.22    1.37
   3   3  11    9.02    1.01
   3  -3  11    8.04    1.16
  -3  -3 -11    7.18    1.23
  -3   3  11    6.58    1.16
   3   3 -11    6.13    0.98
   3   3 -11    7.15    1.10
  -4  -3  11    2.76    1.07
   4   3  11    2.45    0.97
   4  -3 -11    3.17    1.11
  -4   3 -11    3.04    1.20
   4   3  11    2.82    0.87
   4   3 -11    1.57    0.81
   4  -3  11   -0.15    1.06
   4   3 -11    3.44    0.93
  -4  -3 -11    0.75    1.03
  -4   3  11    2.10    1.05
  -5   3 -11   22.81    1.88
   5   3  11   17.51    1.52
   5   3  11   22.04    1.58
   5  -3 -11   18.03    1.60
  -5  -3  11   17.91    1.68
   5   3 -11   19.99    1.43
  -5   3  11   22.10    1.82
   5   3 -11   19.49    1.50
  -5  -3 -11   19.11    1.74
   5  -3  11   18.62    1.71
   6   3  11    1.95    1.11
   6  -3 -11    2.61    1.03
  -6   3 -11    0.81    1.12
  -6  -3  11    1.42    1.31
   6   3  11    3.18    1.04
   6   3 -11    2.77    1.07
  -6   3  11    1.15    1.24
  -6  -3 -11    1.09    1.22
   6  -3  11    0.64    1.18
   7  -3 -11   26.05    1.88
   7   3  11   26.03    2.10
  -7  -3  11   25.35    2.25
  -7   3 -11   23.04    2.01
   7  -3  11   28.76    2.28
   7   3 -11   25.92    1.89
  -7  -3 -11   26.46    2.01
  -7   3  11   24.16    2.15
   8   3  11   -1.98    1.28
  -8  -3  11   -2.18    1.53
  -8   3 -11   -0.54    1.35
  -8  -3 -11    1.04    1.21
   8   3 -11    0.33    1.18
   8  -3  11    1.13    1.40
  -8   3  11   -0.35    1.29
  -9   3 -11    6.15    1.60
  -9  -3  11    5.80    1.78
   9   3  11    4.68    1.56
   9   3 -11    6.51    1.50
   9  -3  11    3.23    1.64
  -9   3  11    5.13    1.75
 -10   3 -11    0.62    1.44
  10   3  11    1.92    1.64
 -10  -3  11   -0.42    1.76
 -10   3  11    2.66    1.85
  10  -3  11    0.10    1.60
 -11  -3  11    2.91    2.01
  11   3  11    1.64    1.65
  11  -3  11    3.21    1.93
 -11   3  11    0.04    1.75
 -12  -3  11    0.79    1.92
  12   3  11    2.96    1.76
 -12   3  11    1.03    2.07
  12  -3  11   -0.44    1.85
   0   3 -12    0.07    0.94
   0  -3  12   -0.87    0.72
   0  -3  12    1.10    0.77
   0  -3 -12   -0.74    0.93
   0   3  12   -0.06    0.85
  -1  -3  12   -1.48    0.74
   1   3  12   -0.07    0.57
   1   3  12   -0.01    0.84
   1  -3 -12   -1.11    1.07
  -1  -3  12    0.21    0.74
  -1   3 -12   -0.62    1.04
   1  -3  12    0.05    0.66
  -1  -3 -12   -0.92    0.95
   1  -3  12   -0.08    0.81
   1   3 -12    0.76    0.95
   1   3 -12   -0.11    0.73
  -1   3  12    1.24    0.95
   2   3  12    1.94    0.72
  -2   3 -12   -0.04    1.05
   2  -3 -12    2.75    1.11
   2   3  12    1.13    0.89
  -2  -3  12    3.36    0.96
   2   3 -12    0.99    0.99
   2  -3  12    0.44    0.94
  -2  -3 -12    1.03    1.07
  -2   3  12    4.10    1.07
   2   3 -12    3.10    0.84
   3   3  12    2.05    0.81
   3  -3 -12    1.50    1.16
  -3   3 -12    1.73    1.11
  -3  -3  12    2.80    1.07
   3   3  12    3.11    0.99
  -3  -3 -12    3.26    1.19
   3   3 -12    2.45    0.97
  -3   3  12    2.83    1.12
   3   3 -12    2.24    0.87
   3  -3  12    3.37    1.05
   4   3  12    1.13    0.85
   4   3  12    0.20    0.97
   4  -3 -12   -0.07    1.13
  -4   3 -12   -0.29    1.10
  -4  -3  12   -0.26    1.08
   4   3 -12    0.27    0.88
  -4   3  12    1.48    1.11
   4   3 -12   -0.14    0.93
  -4  -3 -12   -0.32    1.06
   4  -3  12    1.17    1.03
   5   3  12    1.53    0.93
   5   3  12    1.97    1.02
  -5  -3  12    1.27    1.26
   5  -3 -12    2.05    1.24
  -5   3 -12    0.78    1.16
   5  -3  12    2.80    1.22
  -5   3  12    0.27    1.15
   5   3 -12    1.76    0.93
  -5  -3 -12   -0.20    1.11
   5   3 -12    2.95    1.01
  -6  -3  12    1.37    1.34
  -6   3 -12   -0.29    1.30
   6   3  12    1.72    1.09
   6  -3 -12    1.15    1.15
   6  -3  12   -0.07    1.18
  -6   3  12    2.12    1.37
  -6  -3 -12    1.43    1.33
   6   3 -12    1.87    1.03
  -7  -3  12    0.82    1.54
   7  -3 -12    3.41    1.25
   7   3  12    1.93    1.27
  -7   3 -12    2.35    1.46
  -7  -3 -12    4.16    1.42
  -7   3  12    1.30    1.40
   7   3 -12    5.09    1.22
   7  -3  12    4.19    1.45
   8   3  12    0.92    1.39
  -8   3 -12   -2.05    1.21
  -8  -3  12    1.26    1.53
   8  -3  12    0.78    1.60
  -8   3  12   -0.21    1.45
  -8  -3 -12   -2.77    1.15
   8   3 -12    0.90    1.17
  -9   3 -12    2.24    1.49
  -9  -3  12    0.70    1.80
   9   3  12   -2.11    1.38
  -9   3  12    0.29    1.68
   9  -3  12   -1.10    1.39
 -10   3 -12    0.70    1.56
 -10  -3  12   -3.48    1.78
  10   3  12   -1.26    1.58
  10  -3  12    2.48    1.80
 -10   3  12    0.13    1.69
  11   3  12    1.96    1.85
 -11  -3  12    0.33    1.85
  11  -3  12   -2.49    1.67
 -11   3  12    1.02    1.82
  12   3  12   -0.03    1.76
 -12   3  12    3.19    2.22
  12  -3  12    0.59    1.99
   0   3  13    0.86    1.01
   0  -3  13   -1.28    0.73
   0  -3 -13   -0.55    1.10
   0  -3  13   -0.72    0.78
   0   3 -13    1.33    1.08
  -1  -3  13    5.55    1.01
  -1   3 -13    5.48    1.30
   1  -3 -13    5.51    1.32
  -1  -3  13    4.73    0.95
   1   3  13    5.96    1.15
   1   3 -13    4.52    1.29
   1  -3  13    2.67    0.99
  -1   3  13    5.11    1.12
   1   3 -13    7.09    1.07
  -1  -3 -13    3.66    1.26
   2  -3 -13    1.41    1.18
  -2   3 -13    2.94    1.25
  -2  -3  13    0.65    0.97
   2   3  13    3.06    1.15
   2   3 -13    1.92    0.89
  -2   3  13    2.42    1.16
   2  -3  13    1.64    1.01
  -2  -3 -13    1.88    1.26
   2   3 -13    0.80    1.11
  -3  -3  13   57.32    2.58
  -3   3 -13   56.58    2.82
   3  -3 -13   51.49    2.70
   3   3  13   56.51    2.45
   3   3  13   52.60    2.23
  -3  -3 -13   57.99    2.79
  -3   3  13   55.01    2.68
   3   3 -13   56.72    2.60
   3  -3  13   53.71    2.55
   3   3 -13   53.71    2.33
  -4   3 -13    0.18    1.17
   4  -3 -13   -0.72    1.15
   4   3  13   -1.32    0.74
   4   3  13    0.21    0.97
  -4  -3  13   -0.21    1.16
   4   3 -13    0.37    0.96
  -4  -3 -13    2.08    1.35
   4   3 -13    0.45    0.94
  -4   3  13   -0.47    1.13
   4  -3  13   -0.23    1.07
   5  -3 -13   27.01    2.13
  -5   3 -13   25.16    2.16
  -5  -3  13   26.54    2.07
   5   3  13   26.80    1.82
   5   3 -13   25.02    1.78
  -5   3  13   27.84    2.25
  -5  -3 -13   27.63    2.13
   5  -3  13   28.29    2.17
   5   3 -13   25.75    1.79
  -6   3 -13    0.97    1.29
   6   3  13   -0.01    1.02
   6  -3 -13   -0.82    1.13
  -6  -3  13   -0.02    1.33
  -6  -3 -13    0.14    1.37
   6  -3  13   -0.31    1.19
   6   3 -13   -0.75    1.01
  -6   3  13   -0.34    1.31
  -7   3 -13    4.24    1.45
  -7  -3  13    4.01    1.62
   7  -3 -13    5.14    1.38
   7   3  13    4.10    1.42
  -7  -3 -13    7.47    1.62
   7  -3  13    3.52    1.52
  -7   3  13    3.51    1.58
  -8   3 -13    0.19    1.50
   8   3  13    1.48    1.45
  -8  -3  13   -1.11    1.64
   8  -3  13   -0.64    1.48
  -8  -3 -13    1.83    1.47
  -8   3  13   -1.03    1.65
   9   3  13    0.25    1.45
  -9   3 -13    6.60    1.74
  -9  -3  13    3.60    1.97
  -9   3  13    2.54    1.93
   9  -3  13    7.05    1.85
  10   3  13   -0.47    1.65
 -10  -3  13   -1.18    1.92
 -10   3 -13   -0.69    1.51
 -10   3  13    3.23    1.83
  10  -3  13    0.93    1.70
 -11  -3  13   13.73    2.52
  11   3  13    8.38    2.17
 -11   3  13   12.47    2.56
  11  -3  13   10.54    2.40
   0  -3  14   -0.62    0.82
   0   3 -14    1.73    1.20
   0  -3 -14   -0.50    1.28
   0   3  14    0.20    1.02
   1  -3 -14   -1.30    1.26
  -1  -3  14   -0.70    0.82
   1   3  14   -0.75    1.00
  -1   3 -14    1.25    1.20
  -1  -3  14    0.72    0.90
   1  -3  14    1.06    0.92
  -1  -3 -14    1.30    1.25
  -1   3  14   -0.09    1.06
   1   3 -14   -1.45    1.03
   1   3 -14    0.68    0.89
  -2  -3  14    5.91    1.28
   2   3  14    7.23    1.30
  -2   3 -14    4.60    1.41
   2  -3 -14    6.83    1.52
   2  -3  14    8.22    1.31
  -2   3  14    8.51    1.41
  -2  -3 -14    7.50    1.50
   2   3 -14    5.97    1.42
   2   3 -14    7.12    1.15
   3  -3 -14    1.64    1.42
  -3  -3  14    0.24    1.10
  -3   3 -14   -0.49    1.24
   3   3  14   -0.61    1.02
   3   3 -14   -0.31    1.11
  -3  -3 -14    1.26    1.31
   3   3 -14    2.03    1.02
  -3   3  14   -1.18    1.11
   3  -3  14    0.87    1.10
  -4   3 -14    2.30    1.36
   4  -3 -14    2.13    1.43
  -4  -3  14    1.08    1.34
   4   3 -14    4.52    1.14
   4   3 -14    3.88    1.26
  -4   3  14    4.41    1.44
  -4  -3 -14    4.11    1.41
   4  -3  14    3.21    1.31
  -5   3 -14    0.55    1.29
   5   3  14   -1.28    0.89
   5  -3 -14    0.69    1.38
  -5  -3  14    0.80    1.26
  -5   3  14    0.09    1.41
  -5  -3 -14    0.11    1.31
   5  -3  14   -2.00    1.10
   5   3 -14    0.10    1.01
  -6  -3  14   18.16    2.04
  -6   3 -14   17.41    2.02
   6   3  14   20.41    1.82
   6  -3 -14   19.77    2.02
   6  -3  14   18.73    2.07
  -6   3  14   19.94    2.25
  -6  -3 -14   21.74    2.17
  -7   3 -14   -2.80    1.38
   7   3  14    0.15    1.22
   7  -3 -14   -0.26    1.21
  -7  -3  14    1.17    1.46
  -7   3  14   -1.99    1.59
   7  -3  14    2.56    1.49
  -7  -3 -14    0.82    1.34
  -8   3 -14   -0.12    1.48
   8   3  14    0.64    1.44
  -8  -3  14    2.90    1.67
  -8   3  14    3.69    1.93
  -8  -3 -14    1.23    1.58
   8  -3  14    2.03    1.61
  -9  -3  14    0.18    1.67
   9   3  14    0.49    1.66
  -9   3 -14    0.02    1.48
   9  -3  14    0.12    1.76
  -9   3  14    0.67    1.91
 -10   3 -14    0.47    1.71
  10   3  14   -2.39    1.66
 -10  -3  14    1.33    2.09
  10  -3  14    1.18    1.79
 -10   3  14    2.54    1.97
  11   3  14   -0.37    1.89
 -11  -3  14   -1.52    2.09
  11  -3  14    1.91    1.99
   0  -3 -15    0.65    1.27
   0   3  15    0.13    1.15
   0   3 -15   -1.73    1.20
   0  -3  15    0.32    0.90
  -1  -3  15   13.61    1.37
   1  -3 -15   11.92    1.86
   1   3  15    9.48    1.43
  -1   3 -15   12.08    1.69
  -1   3  15   13.54    1.63
   1   3 -15   12.15    1.65
  -1  -3 -15   12.07    1.68
   1  -3  15   12.18    1.41
  -2   3 -15   -0.73    1.32
   2   3  15   -1.05    1.09
  -2  -3  15   -0.81    0.85
  -2  -3  15   -0.76    1.12
   2  -3 -15   -0.35    1.35
  -2  -3 -15   -2.20    1.23
  -2   3  15   -0.50    1.22
   2   3 -15   -1.28    1.20
   2  -3  15    0.52    1.02
   2   3 -15    2.30    1.06
  -3   3 -15   34.09    2.55
  -3  -3  15   36.98    2.25
   3  -3 -15   32.19    2.48
   3   3 -15   35.35    2.30
   3  -3  15   37.13    2.26
  -3  -3 -15   35.05    2.47
  -3   3  15   34.18    2.40
  -4  -3  15   -0.07    1.30
   4  -3 -15   -0.79    1.42
  -4   3 -15   -0.09    1.33
   4   3 -15   -2.75    0.99
  -4   3  15    1.99    1.40
   4  -3  15   -0.03    1.17
  -4  -3 -15    0.86    1.37
  -5  -3  15   12.13    1.76
  -5   3 -15    9.93    1.91
   5  -3 -15   12.59    1.89
  -5  -3 -15   14.02    1.93
   5  -3  15   14.62    1.86
   5   3 -15    9.16    1.41
  -5   3  15   10.88    1.80
  -6  -3  15   -0.03    1.51
  -6   3 -15   -0.26    1.42
   6  -3 -15    0.25    1.35
   6  -3  15    0.50    1.33
  -6   3  15    1.79    1.46
  -6  -3 -15   -0.80    1.50
   7  -3 -15    1.48    1.40
  -7   3 -15   -0.92    1.58
  -7  -3  15    0.87    1.73
   7   3  15    2.66    1.39
   7  -3  15    3.10    1.64
  -7  -3 -15    0.02    1.57
  -7   3  15   -0.86    1.46
  -8   3 -15    3.66    1.82
   8   3  15   -0.24    1.40
  -8  -3  15   -1.40    1.70
  -8   3  15    0.92    1.68
  -8  -3 -15    0.36    1.64
   8  -3  15   -3.43    1.57
   9   3  15    4.02    1.79
  -9  -3  15    5.82    1.99
  -9   3 -15    6.99    2.04
   9  -3  15    6.29    1.93
  -9   3  15    6.97    2.30
 -10   3 -15   -2.31    1.70
  10   3  15    1.71    1.86
 -10  -3  15   -0.75    2.04
 -10   3  15   -2.88    1.81
  10  -3  15   -4.34    1.63
  11   3  15    8.44    2.27
   0   3  16    0.38    1.18
   0  -3  16   -1.33    0.94
   0   3 -16   -0.08    1.27
   0  -3 -16    0.90    1.39
   1  -3 -16   -2.12    1.39
  -1   3 -16   -0.09    1.30
   1   3  16    1.35    1.24
  -1  -3 -16   -0.06    1.37
  -1   3  16   -0.70    1.17
   1   3 -16    2.49    1.45
   1  -3  16   -0.69    1.01
  -2   3 -16    1.74    1.44
   2  -3 -16    4.36    1.57
   2   3 -16    2.20    1.32
   2  -3  16    2.04    1.13
  -2   3  16    3.65    1.45
  -2  -3 -16    0.14    1.38
   3  -3 -16    0.67    1.37
  -3  -3  16    1.35    1.26
  -3   3 -16   -0.94    1.34
  -3  -3 -16    0.79    1.54
   3   3 -16   -2.03    1.23
   3  -3  16   -1.68    0.99
  -3   3  16   -0.20    1.38
   4  -3 -16    1.55    1.56
  -4  -3  16    2.97    1.45
  -4   3 -16   -0.95    1.43
   4   3 -16   -1.90    1.10
  -4   3  16   -0.32    1.33
   4  -3  16    1.42    1.21
  -4  -3 -16    1.59    1.46
  -5   3 -16   -1.75    1.38
  -5  -3  16    3.39    1.49
   5  -3 -16    1.28    1.43
  -5   3  16    0.19    1.49
   5   3 -16    0.05    1.14
  -5  -3 -16   -1.89    1.48
   5  -3  16    0.35    1.34
  -6   3 -16    0.10    1.56
   6  -3 -16    0.55    1.54
  -6  -3  16    0.33    1.64
   6  -3  16    5.32    1.55
  -6  -3 -16    0.50    1.71
  -6   3  16   -1.17    1.47
  -7   3 -16   -1.01    1.58
  -7  -3  16    3.54    1.75
   7  -3 -16    2.24    1.55
   7  -3  16   -0.08    1.59
  -7   3  16    0.05    1.56
  -7  -3 -16   -2.24    1.59
  -8  -3  16   -1.01    1.87
  -8   3 -16    0.63    1.69
  -8   3  16    0.46    1.74
  -8  -3 -16    0.34    1.78
   8  -3  16   -1.57    1.50
  -9  -3  16    1.60    1.94
  -9   3 -16    2.85    1.96
   9  -3  16    1.10    1.73
  -9   3  16    3.60    2.20
 -10   3 -16    5.34    1.99
  10   3  16    2.34    2.13
  10  -3  16    0.87    2.06
   0  -3 -17   -0.35    1.37
   0   3 -17    0.90    1.38
   0   3  17   -0.10    1.20
  -1   3 -17   10.36    1.88
   1  -3 -17   12.65    2.07
   1   3 -17   12.18    1.90
  -1   3  17   11.61    1.70
  -1  -3 -17   11.39    1.88
   2  -3 -17   -0.27    1.38
  -2   3 -17    1.07    1.62
   2  -3  17    0.16    0.96
  -2  -3 -17   -0.85    1.54
  -2   3  17    0.35    1.16
   2   3 -17   -0.06    1.31
  -3   3 -17    4.06    1.64
   3  -3 -17   -0.14    1.60
   3  -3  17    2.85    1.22
   3   3 -17    0.83    1.38
  -3   3  17    1.85    1.44
  -3  -3 -17    1.54    1.58
   4  -3 -17    1.70    1.67
  -4  -3  17    3.78    1.56
  -4   3 -17   -1.19    1.58
   4  -3  17    0.73    1.22
  -4   3  17    0.95    1.42
  -4  -3 -17    2.75    1.64
   4   3 -17   -0.64    1.29
  -5   3 -17    7.98    2.04
   5  -3 -17    8.98    1.91
  -5  -3  17    3.47    1.71
  -5  -3 -17    7.99    1.85
  -5   3  17    6.43    1.82
   5  -3  17    7.07    1.68
  -6   3 -17   -1.30    1.59
  -6  -3  17    1.46    1.57
   6  -3 -17    1.59    1.65
   6  -3  17   -1.73    1.49
  -6   3  17   -0.45    1.67
  -6  -3 -17   -0.90    1.71
  -7  -3  17    5.40    2.07
  -7   3 -17    9.25    2.24
   7  -3  17    6.44    1.94
  -7   3  17    6.25    1.99
  -7  -3 -17    2.50    1.96
  -8  -3  17    3.12    1.92
  -8   3 -17   -0.29    1.88
   8  -3  17    4.36    1.99
  -8   3  17    2.02    1.86
  -8  -3 -17    3.08    1.97
  -9  -3  17    2.63    2.10
  -9   3 -17    0.29    2.00
   9  -3  17    4.16    1.98
   0  -3 -18    2.03    1.62
   0   3 -18   -2.65    1.49
  -1   3 -18    1.59    1.61
   1  -3 -18   -1.79    1.44
  -1  -3 -18   -0.19    1.53
   1   3 -18   -0.20    1.39
  -1   3  18   -0.50    1.32
  -2   3 -18    9.45    1.91
   2  -3 -18    6.93    1.90
  -2   3  18   10.52    1.85
  -2  -3 -18   10.06    1.96
   2   3 -18    9.89    1.92
   3  -3 -18   -3.12    1.57
  -3   3 -18   -0.19    1.51
  -3  -3 -18   -1.12    1.66
   3   3 -18    0.49    1.54
  -3   3  18   -0.18    1.55
   4  -3 -18   -2.18    1.60
  -4   3 -18   -2.08    1.53
   4   3 -18   -1.81    1.30
  -4  -3 -18   -1.48    1.58
  -4   3  18    0.23    1.61
  -5  -3  18    0.27    1.59
  -5   3 -18    0.67    1.70
   5  -3 -18   -0.65    1.70
  -5   3  18    0.35    1.59
  -5  -3 -18   -3.62    1.67
   5  -3  18    0.33    1.48
  -6   3 -18    3.68    1.90
  -6  -3  18    2.57    1.98
   6  -3 -18    1.22    1.78
  -6  -3 -18    2.54    2.02
  -6   3  18    1.10    1.72
   6  -3  18   -0.73    1.41
  -7   3 -18    2.04    2.07
  -7  -3  18   -0.81    1.93
  -7   3  18   -0.57    1.79
  -7  -3 -18    0.60    1.90
   7  -3  18   -1.09    1.66
  -8  -3  18    4.95    2.11
  -8   3 -18    2.25    1.92
  -8   3  18    4.08    2.13
   8  -3  18    5.65    2.09
  -8  -3 -18    1.57    2.03
   0  -3 -19   -1.49    1.62
   0   3 -19    1.26    1.75
   1  -3 -19    8.62    2.04
  -1   3 -19    8.84    2.16
   1   3 -19   13.64    2.12
  -1  -3 -19    8.63    1.99
   2  -3 -19   -2.18    1.53
  -2   3 -19    0.20    1.68
   2   3 -19    1.25    1.59
  -2   3  19   -1.94    1.43
  -2  -3 -19   -1.22    1.60
  -3   3 -19    3.13    1.82
   3  -3 -19    2.62    1.95
   3   3 -19   -0.24    1.59
  -3  -3 -19    3.41    1.82
  -3   3  19    2.38    1.66
   4  -3 -19   -3.01    1.51
  -4   3 -19   -1.94    1.63
  -4  -3 -19    2.03    1.77
   4   3 -19    1.64    1.52
  -4   3  19   -1.17    1.62
   5  -3 -19   -1.05    1.59
  -5   3 -19   -0.39    1.74
  -5  -3 -19    2.86    2.03
  -5   3  19    1.92    1.91
  -6  -3  19    2.66    1.78
  -6   3 -19   -1.16    1.94
   6  -3 -19    1.68    1.81
  -6  -3 -19   -0.54    2.07
  -6   3  19    3.36    2.06
  -7  -3  19   12.41    2.48
  -7   3 -19    9.67    2.49
  -7  -3 -19   11.32    2.48
  -7   3  19    7.45    2.39
  -8  -3 -19    1.80    1.95
   8  -3  19   -0.54    1.81
   0   3 -20   -3.38    1.66
   0  -3 -20   -0.76    1.77
  -1   3 -20    0.74    1.88
   1  -3 -20    2.42    1.96
  -1  -3 -20   -0.47    1.72
   1   3 -20    0.48    1.75
  -2   3 -20    6.48    1.97
   2  -3 -20    6.96    1.99
  -2  -3 -20    4.09    1.94
   2   3 -20    8.07    2.04
   3  -3 -20   -1.45    1.77
  -3   3 -20   -0.74    1.85
   3   3 -20    0.78    1.76
  -3   3  20    0.39    1.71
  -3  -3 -20    0.16    1.94
   4  -3 -20    0.66    1.89
  -4   3 -20   -3.95    1.91
  -4  -3 -20    0.02    1.85
   4   3 -20   -1.41    1.45
  -4   3  20   -2.35    1.72
  -5   3 -20    1.26    2.08
   5  -3 -20    2.77    2.06
  -5   3  20   -1.41    1.75
  -5  -3 -20    0.23    2.01
   6  -3 -20   -2.98    1.84
  -6  -3 -20   -2.56    1.91
  -6   3  20   -1.81    1.97
   0   3 -21    1.41    1.77
   0  -3 -21   -2.01    1.75
   1  -3 -21    2.79    1.96
  -1   3 -21    5.37    2.22
   1   3 -21    4.17    2.03
  -1  -3 -21    4.07    1.97
   2  -3 -21   -2.04    1.89
  -2   3 -21    1.78    2.00
  -2  -3 -21    4.00    2.06
   2   3 -21   -1.00    1.62
  -3   3 -21   -0.92    1.94
   3  -3 -21   -0.54    1.89
  -3  -3 -21    1.57    1.99
   3   3 -21    1.59    1.93
   4  -3 -21   -1.43    1.86
  -4   3  21    3.28    1.85
   5  -3 -21    2.65    2.07
  -5   3  21    2.33    2.01
   0   4   0   16.81    0.76
   0   4   0   14.87    0.73
   0   4   0   16.27    0.72
  -1   4   0    0.00    0.37
  -1   4   0    0.01    0.40
   1   4   0   -0.26    0.44
   1   4   0   -0.18    0.47
   1   4   0   -0.74    0.34
  -1   4   0   -0.67    0.49
   1  -4   0   -0.18    0.40
   2   4   0  236.89    4.11
  -2   4   0  236.32    4.40
  -2  -4   0  243.48    4.11
   2  -4   0  242.77    4.55
   2   4   0  244.57    4.74
   2   4   0  237.00    4.66
  -2   4   0  229.84    4.64
   3   4   0   -1.49    0.64
   3   4   0    0.71    0.61
  -3  -4   0    0.04    0.60
  -3   4   0    1.65    0.74
  -4   4   0    1.83    0.65
   4  -4   0    2.76    0.71
  -4   4   0    2.61    0.63
  -4  -4   0    3.04    0.75
   4   4   0    1.95    0.70
  -5   4   0   -0.91    0.58
  -5  -4   0    0.26    0.75
   5  -4   0   -0.57    0.71
   5   4   0   -0.06    0.70
  -5   4   0    0.43    0.59
   6  -4   0  144.86    3.90
  -6   4   0  148.70    3.65
  -6   4   0  150.88    3.72
   6   4   0  142.20    3.96
  -6  -4   0  146.38    3.96
   7   4   0   -0.35    0.79
  -7   4   0    0.67    0.74
  -7   4   0   -0.88    0.74
   7  -4   0   -0.98    0.85
  -7  -4   0    0.76    0.86
  -8   4   0   62.60    2.40
   8   4   0   62.19    2.74
  -8   4   0   61.32    2.41
   8  -4   0   63.26    2.70
  -8  -4   0   62.80    2.74
   9  -4   0    0.14    1.03
  -9  -4   0   -0.64    1.10
   9   4   0   -1.28    1.00
  -9   4   0    1.37    0.89
  -9   4   0    0.40    0.91
  10  -4   0   -0.81    1.13
 -10  -4   0   -0.63    1.27
 -10   4   0    1.80    1.01
  10   4   0    0.95    1.29
  11   4   0   -1.75    1.32
 -11   4   0   -1.31    1.03
 -11  -4   0    1.21    1.50
  11  -4   0    0.93    1.40
 -12  -4   0    0.05    1.61
  12   4   0    2.64    1.70
  12  -4   0   -1.94    1.54
  13  -4   0   -0.87    1.76
  13   4   0    2.07    1.91
 -13  -4   0    0.91    1.60
  14   4   0   21.93    2.82
  14  -4   0   17.62    2.62
 -14  -4   0   17.03    2.53
 -15  -4   0   -1.79    1.83
   0   4   1    1.05    0.44
   0   4  -1    0.13    0.39
   0   4   1    0.44    0.33
   0   4  -1   -0.75    0.40
   0   4   1   -0.74    0.41
   0   4  -1    0.07    0.41
  -1   4  -1  749.39   12.60
   1   4   1  763.63   13.00
  -1   4  -1  754.27   12.98
   1   4   1  786.66   12.77
  -1   4  -1  751.24   13.00
   1  -4  -1  779.99   12.74
   1   4   1  785.47   12.91
   1   4  -1  771.98   12.93
  -1   4   1  748.20   12.97
   1  -4   1  756.31   13.01
  -1   4   1  776.54   12.92
  -1   4   1  778.72   12.74
  -1  -4  -1  778.54   12.75
   1   4  -1  778.82   12.67
   1   4  -1  741.33   13.01
  -2   4  -1    1.30    0.59
  -2  -4   1    1.64    0.58
  -2   4  -1    1.26    0.38
   2  -4  -1    1.53    0.48
   2   4   1    1.92    0.62
   2   4  -1    1.01    0.55
   2   4  -1    1.39    0.30
  -2  -4  -1    1.71    0.39
  -2   4   1    1.46    0.58
   2   4  -1    1.24    0.59
   2  -4   1    1.33    0.53
  -2   4   1    1.31    0.52
   3   4   1  420.69    7.83
  -3  -4   1  403.19    7.73
  -3   4  -1  425.52    7.76
  -3   4  -1  423.33    7.29
   3  -4  -1  419.13    7.53
   3   4   1  411.45    7.74
  -3  -4  -1  423.95    7.02
   3  -4   1  419.60    7.74
   3   4  -1  415.31    7.82
  -3   4   1  415.25    7.54
  -3   4   1  411.55    7.70
   4   4   1    0.52    0.63
   4   4   1    1.08    0.70
  -4   4  -1    1.07    0.49
  -4  -4   1    2.09    0.74
  -4   4  -1    1.07    0.62
   4  -4  -1    1.40    0.61
  -4  -4  -1    1.15    0.33
   4   4  -1    0.05    0.61
  -4  -4  -1    2.09    0.69
  -4   4   1    0.81    0.62
  -4   4   1    0.43    0.55
   4  -4   1    1.67    0.72
  -5   4  -1   31.38    1.48
  -5  -4   1   30.61    1.59
  -5   4  -1   31.58    1.29
   5   4   1   29.46    1.55
   5  -4  -1   32.39    1.52
  -5  -4  -1   32.33    0.90
   5   4  -1   29.47    1.55
  -5  -4  -1   30.12    1.53
  -5   4   1   30.05    1.44
   5  -4   1   31.25    1.56
  -5   4   1   31.48    1.44
   6   4   1    1.45    0.86
   6  -4  -1    0.63    0.80
  -6   4  -1    0.02    0.60
  -6   4  -1   -1.18    0.74
  -6  -4   1   -0.02    0.83
  -6   4   1    0.49    0.72
  -6  -4  -1    0.75    0.85
   6  -4   1    1.21    0.83
   6   4  -1    0.50    0.78
  -6   4   1    1.16    0.79
  -6  -4  -1    0.24    0.36
   7   4   1    9.00    1.21
  -7   4  -1   11.26    1.10
  -7   4  -1   10.45    1.00
   7  -4  -1    8.38    1.12
  -7  -4   1   12.56    1.32
  -7   4   1   10.06    1.15
   7  -4   1   10.96    1.28
  -7   4   1   12.82    1.14
  -7  -4  -1    9.78    1.20
   7   4  -1   11.81    1.29
  -8   4  -1    1.44    0.79
   8   4   1    1.48    1.02
  -8  -4   1    2.07    1.09
   8  -4  -1    0.08    0.99
  -8   4  -1   -0.29    0.81
  -8   4   1    0.30    0.81
   8  -4   1   -0.73    1.02
  -8   4   1    1.04    0.96
   8   4  -1    0.63    1.09
  -8  -4  -1    1.30    1.00
  -9   4  -1   18.66    1.46
   9  -4  -1   17.61    1.69
  -9  -4   1   15.06    1.67
   9   4   1   14.61    1.73
  -9   4  -1   15.27    1.46
   9  -4   1   17.86    1.79
  -9   4   1   14.82    1.36
  -9   4   1   14.06    1.46
   9   4  -1   17.27    1.75
  -9  -4  -1   15.96    1.74
 -10  -4   1    1.88    1.43
  10  -4  -1   -0.40    1.29
 -10   4  -1    0.84    1.08
  10   4   1    2.18    1.32
 -10   4  -1    0.83    0.97
 -10   4   1   -0.21    1.08
  10  -4   1    1.25    1.37
  10   4  -1   -0.04    1.22
 -10  -4  -1    0.38    1.35
  11   4   1    1.27    1.44
  11  -4  -1    1.54    1.45
 -11  -4   1   -0.58    1.35
  11   4  -1   -1.09    1.27
 -11  -4  -1   -0.18    1.29
  11  -4   1   -1.25    1.31
 -11   4   1    2.30    1.25
  12  -4  -1   -0.93    1.45
  12   4   1   -1.90    1.34
 -12  -4   1    1.27    1.64
  12   4  -1    1.56    1.68
  12  -4   1   -0.92    1.46
 -12   4   1    1.74    1.37
 -12  -4  -1   -0.26    1.56
  13  -4  -1    2.21    1.80
 -13  -4   1    2.77    1.88
  13   4   1   -1.76    1.81
  13   4  -1    1.74    1.69
 -13  -4  -1    0.90    1.74
  13  -4   1    2.15    1.78
  14  -4  -1    0.71    1.87
  14   4   1    1.95    1.99
 -14  -4   1    0.67    1.73
  14   4  -1    1.93    2.02
 -14  -4  -1    0.34    1.81
  14  -4   1    2.58    2.05
  15  -4  -1   -1.01    2.10
   0   4  -2  137.27    3.00
   0   4   2  138.75    2.58
   0   4  -2  140.41    2.70
   0   4  -2  143.55    2.89
   0   4   2  142.81    2.94
   0   4   2  139.91    2.98
   0  -4  -2  141.64    2.93
  -1  -4   2    0.11    0.44
   1  -4  -2   -0.35    0.27
   1   4   2   -0.31    0.37
  -1   4  -2    0.57    0.52
  -1   4  -2   -0.51    0.48
  -1   4  -2   -0.37    0.28
   1   4   2   -0.85    0.49
  -1   4   2   -0.58    0.47
   1   4  -2   -0.75    0.49
   1   4  -2   -0.32    0.39
  -1   4   2   -0.29    0.51
   1  -4   2   -0.04    0.54
  -1  -4  -2   -0.27    0.41
  -2  -4   2    2.97    0.63
  -2   4  -2    3.43    0.34
   2  -4  -2    4.22    0.47
  -2   4  -2    3.93    0.67
   2   4   2    3.30    0.67
   2   4   2    4.25    0.61
  -2   4   2    4.72    0.63
   2  -4   2    2.92    0.63
   2   4  -2    4.29    0.41
   2   4  -2    3.21    0.63
  -2   4   2    3.89    0.67
  -2  -4  -2    3.55    0.50
  -3  -4   2    0.04    0.63
  -3   4  -2    1.21    0.36
   3  -4  -2    1.35    0.52
   3   4   2    0.24    0.64
  -3   4  -2    1.56    0.64
   3   4   2    1.26    0.63
   3   4  -2    1.28    0.62
   3  -4   2    0.77    0.61
  -3   4   2    1.21    0.63
  -3   4   2    1.12    0.58
  -3  -4  -2    0.47    0.41
   4   4   2   25.08    1.31
  -4   4  -2   23.69    0.94
  -4   4  -2   24.31    1.26
   4   4   2   26.47    1.36
   4  -4  -2   24.77    1.17
   4   4  -2   25.07    1.33
  -4   4   2   23.52    1.22
   4  -4   2   25.00    1.35
  -4  -4  -2   24.33    0.88
  -4   4   2   24.46    1.23
   5  -4  -2    4.43    0.81
  -5   4  -2    1.92    0.77
   5   4   2    3.93    0.86
  -5  -4   2    3.46    0.86
  -5   4  -2    2.97    0.56
   5   4   2    2.76    0.90
  -5   4   2    3.89    0.77
   5   4  -2    2.68    0.86
  -5  -4  -2    3.51    0.87
  -5  -4  -2    3.27    0.50
   5  -4   2    3.14    0.83
  -5   4   2    2.95    0.81
   6  -4  -2   45.86    1.92
  -6  -4   2   46.19    2.08
  -6   4  -2   44.22    1.89
   6   4   2   47.54    2.12
  -6   4  -2   46.00    1.66
   6  -4   2   45.40    2.06
  -6   4   2   47.48    1.98
  -6   4   2   44.48    1.84
  -6  -4  -2   47.70    1.37
  -6  -4  -2   46.43    2.03
   6   4  -2   46.60    2.05
   7  -4  -2    2.03    0.89
  -7   4  -2    0.75    0.66
  -7  -4   2    1.88    0.96
   7   4   2   -0.24    0.87
  -7   4  -2    1.81    0.75
   7   4  -2   -0.78    0.87
  -7  -4  -2    1.36    0.90
  -7   4   2    0.68    0.88
   7  -4   2    0.71    0.89
  -7   4   2    1.82    0.80
  -8  -4   2   27.28    1.88
   8   4   2   27.55    1.95
  -8   4  -2   27.18    1.54
   8  -4  -2   30.35    1.86
  -8   4  -2   29.52    1.70
  -8   4   2   31.07    1.85
  -8  -4  -2   28.14    1.85
   8   4  -2   27.94    1.93
  -8   4   2   29.55    1.67
   8  -4   2   29.56    2.03
  -9   4  -2    0.68    0.89
   9   4   2    2.66    1.24
  -9  -4   2    2.42    1.34
   9  -4  -2    1.75    1.09
  -9   4  -2   -0.04    0.98
  -9   4   2    3.84    1.22
   9   4  -2    2.94    1.29
  -9  -4  -2    1.17    1.12
   9  -4   2    2.11    1.28
  -9   4   2    1.26    0.89
  10   4   2    9.54    1.63
 -10   4  -2    6.90    1.33
 -10  -4   2    4.52    1.57
  10  -4  -2    7.34    1.38
  10   4  -2    4.06    1.41
 -10  -4  -2    7.26    1.55
 -10   4   2    8.54    1.49
  10  -4   2    6.23    1.66
 -11  -4   2   -0.57    1.52
  11  -4  -2    0.11    1.27
  11   4   2    0.27    1.36
  11   4  -2    0.39    1.50
 -11  -4  -2   -0.36    1.26
  11  -4   2   -0.28    1.28
 -11   4   2    1.38    1.29
 -12  -4   2    3.34    1.82
  12   4   2    0.08    1.49
  12  -4  -2    1.04    1.55
  12   4  -2    5.86    1.71
 -12  -4  -2    4.62    1.69
  12  -4   2    2.26    1.79
 -12   4   2    3.76    1.51
 -13  -4   2   -1.66    1.77
  13  -4  -2   -1.57    1.61
  13   4   2   -2.62    1.69
 -13  -4  -2   -0.33    1.60
  13  -4   2   -2.17    1.72
  13   4  -2   -1.90    1.61
  14   4   2    3.42    1.94
 -14  -4   2    4.08    2.11
  14  -4  -2    3.22    1.99
  14  -4   2    4.42    2.11
  14   4  -2    5.54    2.03
 -14  -4  -2    4.32    1.84
  15  -4  -2   -1.42    1.92
   0   4  -3    0.41    0.53
   0   4  -3    0.13    0.54
   0   4   3    0.13    0.26
   0  -4   3   -0.05    0.37
   0   4   3    0.24    0.52
   0  -4  -3    0.51    0.52
   1   4   3   29.16    0.93
  -1   4  -3   25.83    1.13
  -1  -4   3   29.83    1.07
   1   4   3   26.87    1.17
   1  -4  -3   26.00    1.13
  -1   4  -3   26.47    1.16
   1  -4   3   26.32    0.65
   1   4  -3   26.59    1.15
   1   4  -3   28.82    1.02
   1  -4   3   27.15    1.19
  -1   4   3   27.68    1.16
  -1   4   3   26.33    1.15
  -1  -4  -3   27.75    1.08
   2  -4  -3   -0.63    0.33
  -2   4  -3    0.16    0.59
   2   4   3   -0.25    0.63
   2   4   3    0.38    0.52
  -2  -4   3   -0.41    0.52
  -2  -4  -3   -0.19    0.48
  -2   4   3    0.16    0.57
   2   4  -3   -0.01    0.41
   2   4  -3   -0.13    0.56
  -2   4   3   -0.20    0.56
   2  -4   3    0.08    0.57
  -3  -4   3    7.12    0.84
   3   4   3    6.24    0.79
   3  -4  -3    7.20    0.62
   3   4   3    8.16    0.85
  -3   4  -3    6.00    0.79
  -3   4  -3    7.86    0.41
  -3   4   3    7.41    0.81
   3   4  -3    7.54    0.45
   3  -4   3    8.24    0.86
  -3   4   3    7.48    0.82
   3   4  -3    6.85    0.80
  -3  -4  -3    7.80    0.65
   4  -4  -3    4.14    0.64
  -4   4  -3    5.06    0.46
  -4   4  -3    5.85    0.87
  -4  -4   3    3.69    0.80
   4   4   3    4.29    0.79
   4   4   3    5.40    0.82
   4   4  -3    4.44    0.33
  -4  -4  -3    3.32    0.57
   4  -4   3    4.75    0.82
  -4   4   3    4.27    0.77
  -4   4   3    4.77    0.74
   4   4  -3    6.32    0.90
   5  -4  -3   50.14    1.75
   5   4   3   46.35    1.92
  -5  -4   3   51.29    2.07
  -5   4  -3   46.14    1.89
   5   4   3   45.75    1.96
  -5   4  -3   47.65    1.46
   5  -4   3   46.46    2.00
  -5   4   3   48.97    1.86
  -5  -4  -3   44.52    1.87
  -5   4   3   50.17    1.97
   5   4  -3   47.20    1.96
  -5  -4  -3   46.99    1.46
  -6   4  -3   -0.28    0.52
   6   4   3   -0.16    0.77
   6  -4  -3   -0.02    0.69
  -6  -4   3   -0.05    0.82
  -6   4  -3   -0.66    0.65
   6  -4   3    0.48    0.83
  -6  -4  -3    0.25    0.51
  -6  -4  -3   -1.16    0.75
   6   4  -3   -0.12    0.73
  -6   4   3   -0.35    0.64
  -6   4   3    0.25    0.79
   7   4   3   17.42    1.49
  -7   4  -3   17.17    1.37
   7  -4  -3   18.64    1.39
  -7  -4   3   17.35    1.51
  -7   4  -3   16.42    1.12
   7  -4   3   16.20    1.48
   7   4  -3   16.52    1.48
  -7  -4  -3   19.61    1.47
  -7   4   3   19.48    1.36
  -7  -4  -3   18.83    0.98
  -7   4   3   21.98    1.58
  -8   4  -3    7.32    1.12
   8  -4  -3    4.07    1.03
  -8   4  -3    5.57    0.92
  -8  -4   3    6.81    1.32
   8   4   3    4.24    1.26
  -8   4   3    7.33    1.22
  -8   4   3    6.41    1.03
   8  -4   3    6.44    1.39
  -8  -4  -3    6.74    1.18
   8   4  -3    8.91    1.31
   9   4   3    1.03    1.13
   9  -4  -3    1.98    1.11
  -9  -4   3   -0.67    1.15
  -9   4  -3   -0.79    0.93
   9   4  -3    0.21    1.08
  -9   4   3    2.07    0.91
  -9   4   3    2.12    1.26
   9  -4   3   -0.72    1.23
  -9  -4  -3   -0.19    1.06
 -10  -4   3   -1.97    1.37
  10  -4  -3    0.01    1.27
 -10   4  -3    0.05    1.05
  10   4   3    1.03    1.44
  10   4  -3    0.08    1.18
  10  -4   3    1.01    1.32
 -10  -4  -3    1.79    1.26
 -10   4   3    1.12    1.31
  11   4   3    0.90    1.39
 -11  -4   3    1.06    1.51
  11  -4  -3   -0.70    1.32
  11  -4   3   -0.75    1.38
 -11  -4  -3   -0.04    1.40
  11   4  -3    0.85    1.35
 -11   4   3    0.84    1.37
 -12  -4   3   -1.54    1.67
  12   4   3    0.48    1.56
  12  -4  -3   -0.10    1.36
  12  -4   3    1.13    1.78
  12   4  -3   -3.17    1.55
 -12   4   3   -1.25    1.50
 -12  -4  -3    0.59    1.38
  13  -4  -3   -0.08    1.69
 -13  -4   3   -0.01    1.70
  13   4   3    0.66    1.73
  13   4  -3    1.76    1.88
  13  -4   3    2.58    1.97
 -13   4   3    0.31    1.68
 -13  -4  -3    1.84    1.52
  14  -4  -3    0.31    1.82
  14   4   3   -1.98    1.91
 -14  -4   3    1.16    1.83
  14  -4   3    1.94    2.07
  14   4  -3   -0.27    1.87
   0   4   4  378.46    7.13
   0   4  -4  379.80    7.03
   0  -4   4  379.83    6.59
   0   4  -4  389.77    7.22
   0   4   4  389.52    6.39
   0  -4  -4  375.21    7.05
   1  -4  -4    0.08    0.56
  -1   4  -4    0.95    0.61
  -1   4  -4   -0.36    0.56
   1   4   4    0.19    0.41
   1   4   4    0.41    0.59
  -1  -4   4    0.02    0.48
   1  -4   4    1.94    0.64
  -1   4   4    0.00    0.57
   1   4  -4    1.41    0.54
   1   4  -4    1.36    0.58
   1  -4   4    0.80    0.25
  -1  -4  -4    0.10    0.53
   2   4   4    1.34    0.70
  -2   4  -4    2.94    0.70
   2  -4  -4    3.07    0.68
  -2  -4   4    2.34    0.65
   2  -4  -4    1.70    0.30
   2   4   4    1.91    0.58
  -2   4   4    2.78    0.67
  -2  -4  -4    1.53    0.59
   2  -4   4    1.74    0.65
   2   4  -4    2.58    0.52
   2   4  -4    1.81    0.65
  -3   4  -4    0.45    0.62
   3  -4  -4    1.22    0.42
   3  -4  -4    0.10    0.64
   3   4   4    0.84    0.62
  -3  -4   4   -0.68    0.59
   3   4   4   -0.21    0.59
   3  -4   4    1.15    0.67
  -3  -4  -4   -0.30    0.51
  -3   4   4    0.36    0.69
   3   4  -4    0.23    0.59
   3   4  -4    0.68    0.39
  -3   4   4   -0.56    0.57
  -4   4  -4   40.67    1.72
   4  -4  -4   40.74    1.35
   4   4   4   41.06    1.72
  -4   4  -4   40.34    1.08
   4  -4  -4   41.72    1.67
   4   4   4   42.19    1.72
  -4  -4   4   42.95    1.78
   4  -4   4   40.07    1.81
  -4   4   4   38.62    1.64
   4   4  -4   35.15    1.64
   4   4  -4   42.24    1.13
  -4  -4  -4   39.58    1.41
  -4   4   4   39.89    1.70
   5   4   4   -0.29    0.73
  -5  -4   4    0.20    0.86
  -5   4  -4   -0.70    0.40
   5  -4  -4    0.31    0.58
  -5   4  -4    0.29    0.70
   5   4   4   -0.94    0.70
  -5  -4  -4   -0.44    0.54
  -5   4   4   -0.49    0.65
   5   4  -4    0.07    0.71
   5   4  -4   -0.05    0.30
   5  -4   4   -0.72    0.70
  -5   4   4   -0.15    0.74
  -6  -4   4    1.81    0.90
  -6   4  -4    2.00    0.77
   6  -4  -4    3.48    0.78
  -6   4  -4    3.25    0.57
   6   4   4    3.16    0.93
   6   4   4    3.09    0.86
  -6   4   4    1.76    0.92
  -6  -4  -4    3.14    0.68
   6   4  -4    3.81    0.90
   6  -4   4    3.40    0.98
  -6  -4  -4    3.17    0.84
  -6   4   4    2.90    0.79
  -7  -4   4    6.31    1.18
  -7   4  -4    4.61    0.74
   7  -4  -4    3.40    0.89
   7   4   4    3.15    1.02
  -7   4  -4    4.80    0.95
   7   4  -4    4.93    1.04
   7  -4   4    4.88    1.20
  -7   4   4    3.28    1.03
  -7  -4  -4    5.63    0.78
  -7   4   4    5.07    0.91
  -7  -4  -4    5.50    1.01
  -8   4  -4   -1.04    0.84
   8  -4  -4    0.11    0.84
  -8  -4   4   -1.09    1.02
   8   4   4   -1.07    1.07
  -8   4   4    1.08    0.85
   8  -4   4    0.75    1.05
   8   4  -4    1.26    1.02
  -8   4   4    1.26    1.08
  -8  -4  -4    0.14    0.95
  -9  -4   4    1.31    1.26
   9   4   4    3.26    1.29
  -9   4  -4    2.99    1.09
   9  -4  -4    2.83    1.15
   9  -4   4    2.87    1.31
  -9   4   4    2.85    0.98
  -9  -4  -4    1.83    1.18
  -9   4   4    1.98    1.26
   9   4  -4    3.24    1.21
  10   4   4   15.13    1.87
 -10  -4   4   13.51    1.89
  10  -4  -4   19.71    1.81
 -10   4  -4   16.06    1.62
  10   4  -4   17.68    1.97
 -10  -4  -4   19.12    1.82
  10  -4   4   14.94    1.91
 -10   4   4   19.71    1.99
  11   4   4   -2.75    1.27
 -11  -4   4   -0.21    1.50
  11  -4  -4   -2.18    1.23
  11   4  -4   -0.66    1.33
 -11  -4  -4    0.29    1.32
 -11   4   4    0.45    1.42
  11  -4   4   -1.05    1.41
  12  -4  -4   16.44    2.10
 -12  -4   4   16.40    2.23
  12   4   4   14.15    2.13
  12  -4   4   16.44    2.23
 -12   4   4   15.09    2.22
 -12  -4  -4   15.07    1.94
  12   4  -4   17.05    2.19
  13  -4  -4   -0.86    1.67
 -13  -4   4    2.67    1.88
  13   4   4   -0.86    1.75
 -13   4   4   -2.20    1.59
  13   4  -4   -0.78    1.75
  13  -4   4   -0.41    1.67
 -14  -4   4   -2.04    2.04
  14   4   4    1.07    2.04
  14  -4   4    1.82    2.08
  14   4  -4   -1.27    1.81
 -14   4   4   -1.56    1.62
   0   4   5    2.35    0.31
   0  -4  -5    3.34    0.69
   0  -4   5    1.55    0.47
   0   4  -5    2.49    0.69
   0   4  -5    2.62    0.67
   0   4   5    1.42    0.66
   1  -4  -5  199.28    4.29
  -1   4  -5  198.82    4.30
   1   4   5  207.11    3.81
  -1   4  -5  192.00    4.32
  -1  -4   5  195.96    3.96
   1   4   5  196.50    4.28
  -1   4   5  199.82    4.32
   1   4  -5  197.75    4.31
   1  -4   5  191.23    4.30
  -1  -4  -5  194.31    4.20
   1  -4   5  193.42    3.46
   1   4  -5  202.24    4.12
  -2   4  -5    2.57    0.73
   2   4   5    4.01    0.63
   2  -4  -5    2.60    0.71
   2   4   5    2.41    0.68
  -2  -4   5    2.78    0.64
  -2   4   5    2.53    0.71
   2   4  -5    2.73    0.60
   2  -4   5    2.15    0.69
  -2  -4  -5    3.62    0.71
   2   4  -5    3.40    0.69
   3  -4  -5   41.58    1.17
   3   4   5   43.71    1.62
  -3  -4   5   42.93    1.71
   3  -4  -5   39.11    1.63
   3   4   5   40.42    1.66
  -3   4  -5   42.25    1.74
   3   4  -5   42.47    1.33
  -3   4   5   41.12    1.72
   3   4  -5   41.45    1.70
   3  -4   5   40.40    1.73
  -3  -4  -5   43.25    1.57
   4   4   5   -0.09    0.63
   4  -4  -5   -0.93    0.43
  -4   4  -5   -0.13    0.28
   4  -4  -5    0.08    0.64
   4   4   5    0.65    0.65
  -4  -4   5   -0.16    0.74
  -4   4  -5   -0.86    0.63
   4   4  -5    0.87    0.71
  -4  -4  -5   -0.32    0.57
   4   4  -5   -0.48    0.36
  -4   4   5   -0.04    0.75
   4  -4   5    0.38    0.75
   5  -4  -5   37.49    1.71
  -5  -4   5   38.57    1.89
   5   4   5   36.27    1.77
  -5   4  -5   40.23    1.80
  -5   4  -5   39.23    1.19
   5  -4  -5   38.94    1.47
   5   4   5   41.08    1.81
   5  -4   5   38.41    1.93
   5   4  -5   41.28    1.86
  -5  -4  -5   39.48    1.54
  -5   4   5   39.19    1.87
  -5   4   5   40.28    1.78
   5   4  -5   37.74    1.18
   6  -4  -5    0.29    0.70
   6  -4  -5    0.06    0.62
  -6   4  -5    0.03    0.79
  -6  -4   5   -2.14    0.79
   6   4   5    1.05    0.88
   6   4   5   -0.82    0.75
  -6   4  -5   -0.31    0.46
  -6  -4  -5   -1.90    0.73
  -6  -4  -5    0.63    0.61
   6   4  -5    0.35    0.74
  -6   4   5   -0.04    0.82
   6  -4   5   -0.80    0.87
  -6   4   5   -0.03    0.73
   7   4   5    1.01    0.97
   7   4   5    2.08    0.93
   7  -4  -5    2.63    0.80
  -7   4  -5    2.32    0.93
   7  -4  -5    3.11    0.83
  -7  -4   5   -0.22    0.96
  -7  -4  -5    1.81    0.84
  -7   4   5    3.96    1.09
   7   4  -5    2.52    0.95
  -7  -4  -5    2.44    0.75
  -7   4   5    2.09    0.81
   7  -4   5    3.17    1.12
   8  -4  -5   13.57    1.28
  -8   4  -5   13.70    1.36
   8   4   5   15.48    1.66
  -8  -4   5    9.86    1.47
   8  -4  -5   11.16    1.15
   8  -4   5   12.54    1.58
  -8   4   5   11.51    1.22
  -8   4   5   13.27    1.53
  -8  -4  -5   13.26    1.43
   8   4  -5    9.81    1.37
  -9  -4   5   19.60    1.97
   9  -4  -5   18.74    1.51
  -9   4  -5   19.00    1.65
   9  -4  -5   19.88    1.67
   9   4   5   18.57    1.86
  -9   4   5   16.31    1.43
  -9   4   5   17.10    1.81
   9   4  -5   17.79    1.78
   9  -4   5   21.73    2.10
  -9  -4  -5   18.54    1.68
 -10  -4   5   -1.44    1.35
  10  -4  -5    0.25    1.14
  10   4   5    1.82    1.38
 -10   4  -5    0.69    1.08
 -10   4   5    1.21    1.47
 -10  -4  -5   -1.57    1.08
  10   4  -5    0.37    1.21
  10  -4   5   -0.27    1.52
 -11  -4   5   -1.80    1.54
  11   4   5   -1.22    1.48
  11  -4  -5   -0.77    1.31
 -11   4   5   -0.45    1.57
  11   4  -5   -0.66    1.27
 -11  -4  -5   -0.25    1.25
  11  -4   5    0.22    1.49
 -12  -4   5    2.24    1.70
  12   4   5    0.09    1.72
 -12   4   5   -1.02    1.68
  12   4  -5    1.38    1.64
 -12  -4  -5    0.73    1.39
  12  -4   5   -0.66    1.74
 -13  -4   5    3.32    1.99
  13   4   5    8.83    2.22
  13   4  -5    5.38    1.82
  13  -4   5    4.54    2.00
 -13   4   5    4.18    2.00
 -14  -4   5    0.81    1.93
  14  -4   5   -1.20    2.05
  14   4  -5    3.45    1.95
 -14   4   5    2.48    1.98
   0  -4  -6   30.86    1.41
   0  -4   6   32.41    1.08
   0   4  -6   30.46    1.44
   0   4   6   27.73    1.38
   0   4   6   32.49    0.88
   0   4  -6   30.11    1.39
  -1   4  -6    6.25    0.84
  -1  -4   6    6.81    0.72
   1   4   6    6.78    0.57
  -1   4  -6    5.91    0.82
   1   4   6    6.24    0.86
   1  -4  -6    6.05    0.84
   1  -4   6    6.82    0.48
  -1  -4  -6    5.02    0.83
   1   4  -6    6.83    0.82
   1  -4   6    6.83    0.86
  -1   4   6    6.14    0.84
   1   4  -6    6.07    0.79
   2  -4  -6  154.50    3.76
   2   4   6  152.49    3.39
   2   4   6  153.66    3.69
  -2   4  -6  154.12    3.81
  -2  -4   6  153.63    3.55
   2   4  -6  159.18    3.50
   2   4  -6  156.00    3.74
  -2  -4  -6  157.56    3.66
   2  -4   6  151.43    3.79
  -2   4   6  154.13    3.80
   3  -4  -6    2.33    0.78
  -3  -4   6    0.73    0.78
   3  -4  -6    3.10    0.42
  -3   4  -6    2.71    0.80
   3   4   6    3.07    0.81
   3   4   6    1.95    0.65
   3   4  -6    2.63    0.73
  -3  -4  -6    1.87    0.71
  -3   4   6    2.63    0.79
   3  -4   6    1.77    0.77
   3   4  -6    2.12    0.57
  -4  -4   6  100.32    3.05
   4   4   6  100.39    2.92
   4  -4  -6  102.39    2.39
   4  -4  -6  103.88    2.99
   4   4   6  103.87    2.97
  -4   4  -6  104.31    3.10
  -4  -4  -6  102.18    2.79
   4   4  -6  104.00    3.03
   4  -4   6  102.23    3.12
   4   4  -6   98.37    2.44
  -4   4   6  103.34    3.13
  -5  -4   6   -0.53    0.84
   5   4   6    0.63    0.72
   5  -4  -6    0.39    0.54
  -5   4  -6    1.06    0.77
  -5   4  -6    0.57    0.34
   5   4   6   -0.06    0.80
   5  -4  -6    0.92    0.79
  -5  -4  -6    0.05    0.66
   5   4  -6    0.10    0.70
   5   4  -6   -0.08    0.40
   5  -4   6   -1.18    0.73
  -5   4   6    0.26    0.80
   6   4   6    1.99    0.81
   6   4   6    1.00    0.87
   6  -4  -6    0.85    0.67
  -6   4  -6    0.91    0.80
   6  -4  -6    1.82    0.81
  -6  -4   6    1.77    1.06
  -6  -4  -6    0.70    0.68
   6  -4   6    0.94    0.92
   6   4  -6    0.14    0.80
  -6   4   6    1.54    0.98
   7   4   6    4.61    1.15
  -7   4  -6    5.94    1.15
   7  -4  -6    4.33    0.90
   7  -4  -6    5.52    0.94
   7   4   6    4.00    1.00
  -7  -4   6    4.18    1.21
  -7  -4  -6    3.73    0.86
   7   4  -6    4.23    1.04
  -7   4   6    3.99    1.14
   7  -4   6    3.90    1.13
  -7  -4  -6    4.25    0.93
   8  -4  -6    0.55    0.93
  -8  -4   6    0.84    1.20
   8   4   6    1.74    1.16
   8  -4  -6    3.17    0.91
  -8   4  -6    2.86    1.01
  -8   4   6    2.62    1.19
   8  -4   6    2.96    1.20
  -8  -4  -6    2.12    0.99
   8   4  -6    1.46    1.03
  -9  -4   6    4.51    1.45
   9  -4  -6    4.62    1.17
   9   4   6    7.02    1.49
  -9   4  -6    5.73    1.24
   9  -4   6    4.24    1.38
  -9   4   6    4.64    1.48
   9   4  -6    3.72    1.28
  -9  -4  -6    2.01    1.18
  10   4   6   24.66    2.22
 -10  -4   6   26.36    2.32
 -10   4  -6   26.66    2.06
  10  -4  -6   23.98    1.89
 -10   4   6   24.45    2.22
  10   4  -6   26.22    2.16
  10  -4   6   26.01    2.35
 -10  -4  -6   26.21    2.00
  11   4   6    1.49    1.61
 -11  -4   6    0.69    1.56
 -11   4   6   -2.18    1.52
  11   4  -6    1.97    1.56
  11  -4   6   -1.86    1.47
 -11  -4  -6   -1.35    1.20
 -12  -4   6   10.18    2.26
  12   4   6   10.68    2.16
  12   4  -6   12.46    2.08
  12  -4   6   13.36    2.28
 -12   4   6   11.93    2.18
 -13  -4   6   -0.50    1.79
  13   4   6   -0.87    1.67
 -13   4   6   -1.57    1.67
  13   4  -6    1.96    1.79
  13  -4   6    0.09    1.91
 -14   4   6   -1.47    1.87
  14   4  -6    2.44    1.81
   0  -4   7    3.20    0.56
   0   4   7    2.93    0.80
   0   4  -7    3.11    0.78
   0   4   7    3.21    0.39
   0   4  -7    2.64    0.78
   0  -4  -7    3.05    0.80
   1   4   7   42.98    1.72
   1   4   7   40.01    1.29
  -1  -4   7   41.47    1.49
  -1   4  -7   41.57    1.75
  -1   4  -7   42.53    1.78
   1  -4  -7   40.66    1.74
   1   4  -7   43.33    1.71
  -1   4   7   44.59    0.99
   1   4  -7   41.71    1.73
   1  -4   7   41.58    1.19
  -1  -4  -7   42.63    1.75
  -1   4   7   44.55    1.80
   1  -4   7   38.27    1.70
  -2  -4   7    4.75    0.79
   2  -4  -7    5.96    0.38
   2  -4  -7    5.22    0.90
   2   4   7    4.06    0.63
   2   4   7    4.07    0.81
  -2   4  -7    5.77    0.94
  -2  -4  -7    5.40    0.86
   2   4  -7    4.97    0.76
   2  -4   7    5.48    0.41
   2  -4   7    4.87    0.86
   2   4  -7    5.25    0.84
  -2   4   7    7.10    0.97
  -3  -4   7    2.97    0.82
   3   4   7    3.74    0.88
   3  -4  -7    3.17    0.85
  -3   4  -7    4.93    0.92
   3   4   7    3.45    0.70
   3  -4  -7    4.30    0.45
   3   4  -7    4.56    0.89
  -3   4   7    3.26    0.84
   3   4  -7    3.32    0.65
   3  -4   7    3.67    0.88
  -3  -4  -7    3.87    0.85
  -4  -4   7    1.52    0.82
   4  -4  -7    2.13    0.83
   4  -4  -7    2.21    0.50
   4   4   7    2.66    0.77
   4   4   7    2.04    0.76
  -4   4  -7    2.89    0.85
  -4  -4  -7    1.94    0.79
   4   4  -7    1.09    0.72
   4   4  -7    1.89    0.57
  -4   4   7    0.63    0.82
   4  -4   7    1.94    0.94
   5  -4  -7   13.61    0.92
   5  -4  -7   11.96    1.21
  -5   4  -7   14.56    1.34
   5   4   7   12.49    1.25
  -5  -4   7   13.52    1.35
   5   4   7   14.55    1.25
   5   4  -7   14.18    1.26
   5   4  -7   14.33    0.90
  -5   4   7   14.01    1.36
  -5  -4  -7   14.75    1.18
   5  -4   7   13.18    1.33
   6   4   7   -0.60    0.70
   6  -4  -7    0.65    0.82
   6   4   7   -0.72    0.91
  -6   4  -7    0.57    0.84
  -6  -4   7   -0.89    0.89
   6  -4  -7    0.60    0.61
   6  -4   7    1.15    0.99
   6   4  -7   -0.55    0.83
  -6   4   7   -0.87    0.91
  -6  -4  -7   -0.08    0.73
  -7   4  -7    1.41    1.00
   7   4   7    1.21    0.97
   7   4   7    0.20    0.96
   7  -4  -7    2.90    0.86
   7  -4  -7    1.41    0.87
  -7  -4   7   -0.41    1.04
   7   4  -7    0.90    1.00
  -7   4   7    1.94    1.08
  -7  -4  -7    0.70    0.88
  -7  -4  -7    0.00    0.85
   7  -4   7   -0.67    1.06
  -8   4  -7    9.00    1.40
   8  -4  -7    7.29    1.14
   8   4   7    7.40    1.49
   8  -4  -7    6.43    1.14
  -8  -4   7    4.66    1.39
  -8   4   7    9.33    1.48
   8  -4   7    6.96    1.44
   8   4  -7    7.80    1.38
  -8  -4  -7    8.21    1.25
   9   4   7    1.41    1.29
  -9  -4   7    3.67    1.42
  -9   4  -7    2.77    1.26
  -9   4   7    1.24    1.31
   9   4  -7   -0.72    1.18
  -9  -4  -7    1.74    1.06
   9  -4   7   -0.07    1.31
 -10  -4   7    0.18    1.47
  10   4   7    1.66    1.44
 -10   4  -7    0.05    1.19
  10   4  -7   -0.36    1.20
  10  -4   7    0.35    1.47
 -10  -4  -7    1.52    1.06
 -10   4   7   -2.86    1.26
 -11  -4   7    3.41    1.70
  11   4   7    2.33    1.64
 -11   4   7    0.18    1.56
  11   4  -7    0.40    1.33
  11  -4   7    1.41    1.64
  12   4   7   -1.09    1.54
 -12  -4   7    1.78    1.75
  12  -4   7    0.78    1.79
  12   4  -7    0.94    1.58
 -12   4   7   -1.60    1.73
  13   4   7   -0.30    1.91
 -13  -4   7    0.15    1.89
  13  -4   7    0.83    1.89
  13   4  -7    1.25    1.74
 -13   4   7    3.03    1.88
 -14   4   7    3.61    2.05
  14   4  -7   -1.90    1.76
   0   4   8   12.80    0.66
   0   4   8   11.89    1.08
   0  -4   8   13.91    0.85
   0   4  -8   13.22    1.14
   0  -4  -8   12.04    1.14
   0   4  -8   12.88    1.07
  -1   4  -8    5.16    0.88
   1   4   8    4.59    0.57
  -1  -4   8    5.68    0.73
  -1   4  -8    6.56    0.99
   1   4   8    6.34    0.90
   1  -4  -8    6.17    0.98
   1   4  -8    6.66    0.91
  -1  -4  -8    5.09    0.99
  -1   4   8    5.84    0.40
   1   4  -8    4.37    0.79
   1  -4   8    7.15    0.97
  -1   4   8    4.43    0.87
   1  -4   8    4.88    0.57
   2  -4  -8   72.79    1.60
   2   4   8   72.04    2.42
   2   4   8   74.65    2.12
  -2   4  -8   72.23    2.58
  -2  -4   8   73.31    2.30
   2  -4  -8   76.33    2.56
   2   4  -8   73.67    2.34
   2  -4   8   72.45    1.65
   2  -4   8   73.01    2.52
  -2   4   8   69.38    2.49
  -2  -4  -8   71.36    2.46
  -2   4   8   73.69    1.60
   2   4  -8   75.79    2.48
  -3  -4   8    1.51    0.75
   3   4   8    1.96    0.67
   3   4   8    2.24    0.84
   3  -4  -8    1.50    0.40
  -3   4  -8    1.49    0.82
   3  -4  -8    1.96    0.83
  -3   4   8    1.98    0.86
   3  -4   8    1.60    0.32
  -3  -4  -8    0.92    0.84
   3  -4   8    1.15    0.81
   3   4  -8    1.86    0.71
   3   4  -8    1.33    0.64
   4  -4  -8   46.15    2.03
   4  -4  -8   47.13    1.43
   4   4   8   48.16    1.97
   4   4   8   47.91    2.00
  -4   4  -8   41.81    2.08
  -4  -4   8   44.18    2.05
  -4  -4  -8   45.76    1.99
  -4   4   8   43.00    2.10
   4   4  -8   48.00    1.75
   4   4  -8   45.07    2.02
   4  -4   8   44.41    2.13
  -5   4  -8    0.73    0.88
   5   4   8    1.00    0.76
  -5  -4   8    1.61    0.93
   5  -4  -8    1.76    0.95
   5  -4  -8    2.45    0.60
   5   4   8    4.01    0.97
   5  -4   8    3.22    1.10
   5   4  -8    2.09    0.86
  -5  -4  -8    2.47    0.84
  -5   4   8    2.21    0.98
   5   4  -8    2.75    0.64
  -6   4  -8   89.38    3.22
   6   4   8   92.83    3.28
  -6  -4   8   89.29    3.34
   6  -4  -8   93.37    2.69
   6   4   8   89.12    3.00
   6  -4  -8   96.34    3.13
  -6   4   8   90.79    3.33
   6  -4   8   88.39    3.36
   6   4  -8   87.08    3.13
  -6  -4  -8   94.10    3.01
  -7  -4   8    2.91    1.31
   7   4   8    3.27    1.23
   7  -4  -8    4.39    1.08
   7   4   8    2.45    1.02
  -7   4  -8    5.16    1.15
   7  -4   8    4.83    1.38
  -7   4   8    4.28    1.26
  -7  -4  -8    4.05    1.08
   7   4  -8    1.74    0.98
   8  -4  -8   42.43    2.14
   8   4   8   43.44    2.59
  -8  -4   8   40.26    2.56
  -8   4  -8   44.90    2.42
   8   4   8   44.59    2.40
  -8   4   8   38.89    2.49
  -8  -4  -8   45.53    2.28
  -8  -4  -8   39.24    2.23
   8  -4   8   38.13    2.52
   8   4  -8   42.28    2.43
  -9   4  -8    0.51    1.23
   9   4   8   -0.97    1.22
  -9  -4   8    0.11    1.39
   9  -4   8    0.34    1.46
  -9   4   8    3.64    1.47
   9   4  -8    3.09    1.39
  -9  -4  -8    2.81    1.17
  10   4   8   14.94    2.08
 -10   4  -8   13.49    1.74
 -10  -4   8   18.95    2.27
  10   4  -8   15.27    1.84
  10  -4   8   12.64    2.10
 -10   4   8   11.25    1.88
 -11  -4   8   -0.93    1.56
  11   4   8    0.59    1.54
  11  -4   8   -1.14    1.58
  11   4  -8   -1.29    1.38
 -11   4   8    1.35    1.62
 -12  -4   8    7.29    2.03
  12   4   8    3.53    1.89
  12   4  -8    6.49    1.71
 -12   4   8    6.69    2.00
  12  -4   8    3.57    1.88
 -13  -4   8   -3.41    1.69
  13   4   8   -2.32    1.69
  13   4  -8    5.69    1.85
  13  -4   8   -0.65    1.83
 -13   4   8   -1.15    1.79
  14   4  -8   11.75    2.30
   0  -4  -9   11.40    1.20
   0   4   9   12.86    1.16
   0   4  -9   10.91    1.08
   0   4   9   11.69    0.69
   0   4  -9   10.68    1.15
   0  -4   9    9.70    0.84
   1  -4  -9    5.33    1.00
  -1  -4   9    5.94    0.83
  -1   4  -9    5.79    1.02
   1   4   9    5.94    0.61
   1   4   9    7.16    1.00
   1   4  -9    5.35    0.89
   1  -4   9    5.39    0.63
  -1   4   9    6.30    0.98
   1   4  -9    5.95    1.01
  -1  -4  -9    6.03    1.03
   1  -4   9    5.33    0.96
  -1   4   9    6.65    0.47
  -2   4  -9    0.71    0.84
   2   4   9    0.92    0.77
   2  -4  -9   -1.95    0.75
   2   4   9    0.40    0.53
  -2  -4   9   -0.36    0.72
   2  -4   9   -0.33    0.40
  -2  -4  -9   -0.63    0.76
   2   4  -9   -0.58    0.69
  -2   4   9   -0.44    0.78
   2  -4   9    0.14    0.80
  -2   4   9    0.32    0.29
   2   4  -9    0.37    0.71
  -3  -4   9   57.53    2.27
   3   4   9   58.78    2.09
   3  -4  -9   62.81    2.43
   3   4   9   59.38    2.31
   3  -4  -9   62.70    1.56
  -3   4  -9   58.10    2.44
   3  -4   9   62.31    2.46
   3   4  -9   62.82    2.19
   3   4  -9   59.65    2.29
  -3  -4  -9   57.56    2.35
  -3   4   9   59.13    2.42
   4  -4  -9    0.19    0.86
   4   4   9   -0.85    0.66
  -4  -4   9   -0.44    0.76
   4   4   9    0.56    0.71
  -4   4  -9   -0.98    0.79
   4   4  -9   -1.11    0.71
  -4   4   9   -0.88    0.82
   4   4  -9    0.38    0.66
   4  -4   9   -0.98    0.85
  -4  -4  -9    0.64    0.91
  -5  -4   9    1.10    1.04
  -5   4  -9    1.02    0.92
   5   4   9    1.10    0.86
   5  -4  -9    0.10    0.95
   5   4   9   -1.51    0.79
  -5  -4  -9    1.31    0.97
  -5   4   9   -1.23    0.91
   5   4  -9    1.22    0.70
   5  -4   9    1.57    1.07
   5   4  -9   -0.89    0.71
   6   4   9    0.31    0.98
  -6  -4   9    0.47    1.06
   6   4   9   -0.91    0.93
  -6   4  -9    1.57    1.04
   6  -4  -9    0.08    0.92
   6   4  -9    0.03    0.93
  -6   4   9   -0.84    1.02
   6  -4   9    0.10    1.03
  -6  -4  -9    0.46    0.96
   7   4   9    0.41    1.22
  -7  -4   9   -1.14    1.17
   7   4   9    0.70    0.99
   7  -4  -9   -0.25    0.96
  -7   4  -9    0.51    1.14
   7  -4   9   -2.03    1.08
  -7  -4  -9   -0.49    0.98
  -7   4   9   -0.16    1.06
   7   4  -9    2.18    1.12
   8   4   9    7.45    1.51
  -8  -4   9    5.03    1.54
   8  -4  -9    7.51    1.27
   8   4   9    7.24    1.42
  -8   4  -9    7.55    1.48
   8  -4   9    5.66    1.56
  -8  -4  -9    7.76    1.27
  -8   4   9    5.13    1.56
  -8  -4  -9    5.73    1.27
   8   4  -9    5.16    1.27
   9   4   9   21.53    2.18
  -9  -4   9   18.04    2.15
  -9   4  -9   22.11    1.98
  -9   4   9   23.22    2.23
   9  -4   9   19.42    2.15
   9   4  -9   23.35    1.98
 -10   4  -9   -0.12    1.30
  10   4   9    0.07    1.53
 -10  -4   9    0.22    1.48
  10   4  -9   -2.01    1.27
 -10   4   9    3.19    1.67
  10  -4   9   -0.94    1.62
  11   4   9    4.88    1.79
 -11  -4   9    6.08    1.90
 -11   4   9    4.33    1.83
  11   4  -9    2.22    1.62
  11  -4   9    6.66    1.93
 -12  -4   9   -1.34    1.63
  12   4   9    0.65    1.75
 -12   4   9   -1.07    1.67
  12   4  -9    0.24    1.68
  12  -4   9    1.03    1.73
  13   4   9   -0.27    1.87
 -13  -4   9    0.62    2.11
  13   4  -9    1.85    1.81
 -13   4   9   -2.42    1.74
  13  -4   9   -2.89    1.93
   0   4  10  281.42    6.27
   0  -4  10  274.48    5.60
   0   4 -10  282.33    6.28
   0  -4  10  284.72    6.28
   0   4  10  279.80    5.33
   0   4 -10  282.04    6.39
   0  -4 -10  278.86    6.40
  -1  -4  10    1.17    0.66
  -1   4 -10    0.73    0.99
   1   4  10    2.11    0.90
   1  -4 -10    0.81    0.95
   1   4  10    0.95    0.53
   1  -4  10   -0.75    0.88
   1  -4  10    1.23    0.56
   1   4 -10   -0.68    0.77
   1   4 -10   -0.23    0.78
  -1  -4 -10    0.70    0.91
  -1   4  10   -0.76    0.74
   2   4  10   15.56    1.02
  -2   4 -10   13.17    1.33
   2  -4 -10   11.82    1.31
   2   4  10   15.01    1.28
  -2  -4  10   13.66    1.15
   2  -4  10   12.31    1.23
   2  -4  10   14.13    0.80
   2   4 -10   13.72    1.21
  -2   4  10   13.04    1.27
  -2  -4 -10   12.25    1.30
   2   4 -10   11.79    1.12
   3   4  10   -0.08    0.60
  -3  -4  10   -0.29    0.82
   3  -4 -10   -2.73    0.79
   3   4  10    0.20    0.81
  -3   4 -10   -0.20    0.94
   3   4 -10   -1.07    0.69
   3  -4  10   -0.59    0.83
  -3  -4 -10    1.99    0.96
   3   4 -10   -0.34    0.73
  -3   4  10    1.19    0.91
  -4   4 -10   -0.25    0.88
  -4  -4  10    0.44    0.82
   4   4  10    1.36    0.76
   4   4  10   -0.15    0.83
   4  -4 -10   -0.52    0.98
   4   4 -10   -0.35    0.74
   4   4 -10   -0.04    0.73
  -4  -4 -10    0.71    1.01
   4  -4  10   -1.36    0.85
  -4   4  10    0.07    0.91
  -5   4 -10   -0.37    0.95
   5   4  10    0.37    0.90
   5   4  10    1.48    0.90
   5  -4 -10   -0.20    1.05
  -5  -4  10   -1.99    0.89
   5   4 -10    1.24    0.91
  -5   4  10    0.34    1.02
   5   4 -10   -1.46    0.67
  -5  -4 -10   -0.75    0.98
   5  -4  10   -1.52    0.95
   6  -4 -10   47.54    2.38
   6   4  10   54.34    2.42
  -6   4 -10   51.44    2.60
  -6  -4  10   48.09    2.55
   6   4  10   49.52    2.42
  -6   4  10   49.12    2.64
   6   4 -10   53.68    2.50
  -6  -4 -10   51.02    2.44
   6  -4  10   49.23    2.64
   7   4  10    2.51    1.12
   7  -4 -10    2.26    1.02
   7   4  10    1.11    1.24
  -7   4 -10    1.35    1.30
  -7  -4  10    1.19    1.43
  -7   4  10    1.56    1.29
   7   4 -10    0.37    1.07
  -7  -4 -10    0.97    1.14
   7  -4  10    2.29    1.29
  -8  -4  10   40.72    2.67
  -8   4 -10   41.08    2.53
   8  -4 -10   40.48    2.25
   8   4  10   35.97    2.50
   8   4  10   38.00    2.23
  -8  -4 -10   45.76    2.42
  -8   4  10   42.66    2.77
   8   4 -10   41.85    2.44
   8  -4  10   41.80    2.74
   9   4  10   -0.73    1.42
  -9   4 -10    3.00    1.42
  -9  -4  10   -2.86    1.35
  -9   4  10   -0.80    1.44
   9   4 -10   -0.70    1.26
   9  -4  10    1.37    1.41
 -10   4 -10    0.70    1.43
 -10  -4  10    2.39    1.68
  10   4  10   -0.24    1.55
 -10   4  10    1.10    1.74
  10  -4  10    2.93    1.66
  10   4 -10   -1.49    1.33
 -11  -4  10   -0.71    1.64
  11   4  10   -3.97    1.35
  11  -4  10    1.89    1.95
  11   4 -10    0.43    1.50
 -11   4  10   -0.89    1.66
 -12  -4  10    2.56    1.97
  12   4  10    2.76    1.72
  12  -4  10    1.03    2.04
  12   4 -10    0.79    1.69
 -12   4  10    3.07    2.04
   0  -4 -11   -0.29    0.93
   0   4 -11   -0.65    0.68
   0  -4  11    0.21    0.61
   0   4  11    0.25    0.82
   0   4 -11    0.90    0.94
   0  -4  11    0.12    0.80
   1   4  11    1.24    0.58
   1  -4 -11    1.70    1.03
  -1   4 -11    0.98    1.06
   1   4  11    1.30    0.90
  -1  -4  11    1.53    0.78
   1   4 -11    0.77    0.89
  -1  -4 -11    0.97    1.05
  -1   4  11    2.22    0.93
   1  -4  11    2.22    0.96
   1  -4  11    1.38    0.62
   1   4 -11    2.62    0.85
  -2  -4  11   -0.04    0.78
  -2   4 -11   -2.03    0.82
   2   4  11   -1.44    0.79
   2  -4 -11    0.00    1.03
   2   4  11   -0.13    0.59
   2  -4  11    0.11    0.81
  -2  -4 -11   -0.14    0.92
  -2   4  11   -1.43    0.90
   2   4 -11   -0.17    0.74
   2   4 -11   -0.37    0.85
   3  -4 -11   -0.05    0.99
   3   4  11    1.28    0.94
  -3  -4  11    1.38    0.92
   3   4  11    2.34    0.74
  -3   4 -11    1.47    1.07
   3   4 -11    0.62    0.81
   3   4 -11    1.17    0.85
   3  -4  11    0.36    0.92
  -3  -4 -11    2.14    1.11
  -3   4  11    2.50    1.02
   4  -4 -11    1.11    1.07
  -4  -4  11   -0.75    0.90
   4   4  11   -0.30    0.83
  -4   4 -11    0.50    1.01
   4   4  11    0.88    0.78
   4  -4  11    0.12    1.07
  -4  -4 -11    1.78    1.04
   4   4 -11    0.13    0.82
  -4   4  11   -0.59    1.05
   4   4 -11   -0.16    0.75
   5   4  11    2.78    0.98
  -5   4 -11   -0.95    1.14
   5   4  11    1.54    1.08
  -5  -4  11    4.21    1.30
   5  -4 -11    1.96    1.10
  -5   4  11    0.78    1.13
   5   4 -11    1.50    0.85
   5   4 -11    2.60    1.02
  -5  -4 -11    3.22    1.15
   5  -4  11    2.49    1.18
   6   4  11   -0.20    0.94
   6  -4 -11    0.12    1.11
  -6  -4  11   -0.31    1.30
   6   4  11    0.59    1.02
  -6   4 -11   -0.31    1.09
  -6   4  11   -0.13    1.16
  -6  -4 -11    0.93    1.18
   6   4 -11    0.90    1.01
   6  -4  11    0.45    1.20
   7   4  11    5.07    1.30
   7  -4 -11    7.41    1.37
  -7  -4  11    9.07    1.68
   7   4  11    6.65    1.41
  -7   4 -11    9.30    1.55
   7  -4  11    6.84    1.56
  -7   4  11    8.10    1.64
   7   4 -11    6.39    1.34
  -7  -4 -11    7.03    1.47
   8  -4 -11    1.39    1.10
  -8  -4  11   -2.52    1.32
   8   4  11    0.87    1.34
  -8   4 -11    1.25    1.25
   8   4 -11    0.06    1.22
  -8   4  11    2.26    1.47
   8  -4  11   -0.25    1.39
  -8  -4 -11    0.83    1.28
  -9  -4  11    7.85    1.88
   9   4  11    9.45    1.71
  -9   4 -11   12.65    1.80
  -9   4  11    9.80    1.92
   9  -4  11    7.71    1.78
   9   4 -11    6.73    1.59
 -10   4 -11    0.78    1.52
 -10  -4  11    2.90    1.81
  10   4  11   -3.23    1.43
  10   4 -11   -1.03    1.38
  10  -4  11    0.15    1.62
 -10   4  11   -1.02    1.59
 -11  -4  11    4.16    1.94
  11   4  11    3.72    1.86
  11  -4  11    3.47    2.07
 -11   4  11    2.55    2.04
  12   4  11   -3.40    1.67
 -12  -4  11    0.98    1.92
  12  -4  11    0.98    2.10
 -12   4  11    1.59    1.96
   0  -4  12    6.34    0.89
   0  -4  12    5.50    1.06
   0   4 -12    7.71    1.10
   0  -4 -12    7.73    1.32
   0   4  12    7.41    1.19
   0   4 -12    4.36    1.17
  -1  -4  12    0.66    0.80
   1   4  12    0.19    0.91
  -1   4 -12    0.94    1.04
   1  -4 -12    1.38    1.07
  -1  -4 -12   -0.08    1.10
   1   4 -12    0.61    0.81
   1  -4  12    0.76    0.82
  -1   4  12   -0.36    0.85
   1   4 -12    0.34    1.00
  -2  -4  12   50.11    2.16
   2   4  12   54.63    2.38
   2  -4 -12   43.73    2.44
  -2   4 -12   47.98    2.47
   2   4  12   51.25    2.06
   2   4 -12   48.03    2.32
  -2  -4 -12   50.72    2.51
   2   4 -12   47.93    2.19
  -2   4  12   53.54    2.50
   2  -4  12   49.23    2.36
  -3  -4  12    4.68    1.08
   3   4  12    3.49    1.06
  -3   4 -12    3.25    1.21
   3   4  12    4.01    0.82
   3  -4 -12    3.70    1.20
   3   4 -12    2.56    0.96
  -3  -4 -12    4.10    1.20
  -3   4  12    4.06    1.27
   3   4 -12    1.99    0.91
   3  -4  12    2.47    1.14
   4   4  12   34.54    2.01
   4  -4 -12   40.90    2.39
  -4  -4  12   37.20    2.17
   4   4  12   37.64    1.95
  -4   4 -12   37.74    2.31
   4   4 -12   42.59    2.13
   4   4 -12   36.38    1.96
   4  -4  12   36.66    2.21
  -4   4  12   41.95    2.35
  -4  -4 -12   34.40    2.19
  -5  -4  12    1.51    1.28
   5  -4 -12    1.24    1.16
   5   4  12   -1.01    0.83
  -5   4 -12   -0.22    1.21
   5   4  12    0.40    1.01
   5   4 -12   -1.90    0.75
  -5  -4 -12    1.77    1.17
   5   4 -12   -0.43    0.90
  -5   4  12   -0.48    1.11
   5  -4  12   -1.82    1.04
   6  -4 -12    1.86    1.23
   6   4  12    0.42    0.99
   6   4  12    0.17    1.09
  -6   4 -12    1.54    1.26
  -6  -4  12   -1.16    1.24
   6  -4  12   -0.64    1.16
   6   4 -12    2.83    1.08
  -6  -4 -12    1.28    1.26
  -6   4  12   -0.26    1.27
   7  -4 -12    0.38    1.12
  -7  -4  12   -1.43    1.34
  -7   4 -12    0.42    1.42
   7   4  12    0.12    1.01
  -7  -4 -12    0.17    1.31
   7  -4  12    0.61    1.45
   7   4 -12    0.86    1.12
  -7   4  12   -1.65    1.30
  -8  -4  12   11.83    1.95
   8  -4 -12    6.33    1.30
  -8   4 -12    8.00    1.70
   8   4  12    5.46    1.61
   8  -4  12    3.95    1.57
  -8  -4 -12    5.14    1.50
  -8   4  12    7.43    1.80
   8   4 -12    7.54    1.46
  -9   4 -12    0.62    1.54
   9   4  12    2.14    1.57
  -9  -4  12    1.74    1.76
   9  -4  12    0.75    1.72
   9   4 -12    0.39    1.35
  -9   4  12    0.60    1.61
  10   4  12    3.91    1.82
 -10  -4  12    6.11    1.96
 -10   4 -12    1.30    1.58
 -10   4  12    6.00    1.99
  10  -4  12    4.79    1.92
 -11  -4  12    0.51    1.80
  11   4  12    0.24    1.80
 -11   4  12   -1.49    1.76
  11  -4  12   -2.79    1.85
  12   4  12    2.37    2.01
   0  -4  13   -0.51    0.77
   0   4  13    3.04    1.13
   0   4 -13   -0.71    1.01
   0  -4 -13   -1.12    1.07
  -1  -4  13    4.33    1.00
  -1  -4  13    1.84    0.92
  -1   4 -13    3.83    1.24
   1   4  13    1.55    1.04
   1  -4 -13    1.57    1.31
  -1   4  13    3.19    1.14
   1   4 -13    2.67    0.93
  -1  -4 -13    1.62    1.18
   1  -4  13    2.65    1.04
   1   4 -13    2.04    1.10
  -2   4 -13    1.85    1.24
   2   4  13   -1.56    0.94
   2  -4 -13   -0.73    1.12
  -2  -4  13   -0.68    0.91
  -2  -4 -13   -1.35    1.12
   2   4 -13    2.05    1.13
  -2   4  13    1.22    1.15
   2  -4  13    0.34    0.94
   2   4 -13    0.80    0.90
  -3  -4  13   15.71    1.54
   3   4  13   15.81    1.55
   3  -4 -13   12.61    1.68
  -3   4 -13   14.98    1.72
   3  -4  13   14.80    1.59
   3   4 -13   12.94    1.36
  -3  -4 -13    9.14    1.62
  -3   4  13   16.11    1.64
   3   4 -13   12.76    1.47
   4   4  13    0.05    0.84
   4  -4 -13    1.15    1.30
  -4   4 -13    2.01    1.30
   4   4  13    0.29    1.06
  -4  -4  13    1.06    1.19
  -4  -4 -13    2.84    1.41
   4  -4  13    1.71    1.17
   4   4 -13    1.95    0.99
   4   4 -13    2.95    1.08
  -4   4  13    2.03    1.30
   5   4  13   -0.10    1.06
  -5  -4  13    1.36    1.25
  -5   4 -13    0.70    1.30
   5  -4 -13    2.97    1.42
   5   4  13   -0.79    0.88
   5   4 -13   -1.59    0.94
   5   4 -13    1.12    0.93
   5  -4  13   -0.26    1.22
  -5  -4 -13   -0.67    1.17
  -5   4  13   -0.18    1.38
   6  -4 -13    0.82    1.29
   6   4  13    0.84    1.06
  -6  -4  13   -0.55    1.36
  -6   4 -13    0.48    1.30
   6  -4  13    1.17    1.46
  -6   4  13    0.41    1.34
   6   4 -13    1.13    1.10
  -6  -4 -13    1.96    1.43
  -7   4 -13    2.54    1.55
   7  -4 -13   -0.07    1.20
   7   4  13    0.95    1.15
  -7  -4  13    5.05    1.70
  -7   4  13    0.83    1.47
   7  -4  13   -2.10    1.43
  -7  -4 -13    4.53    1.58
   7   4 -13    2.70    1.22
   8   4  13   -0.85    1.32
  -8  -4  13    0.24    1.72
  -8   4 -13   -0.77    1.38
   8  -4  13    0.05    1.51
  -8  -4 -13   -0.29    1.36
  -8   4  13    3.18    1.70
  -9   4 -13    0.99    1.59
   9   4  13   -0.08    1.45
  -9  -4  13    1.31    1.76
  -9   4  13    1.20    1.71
   9  -4  13   -0.59    1.53
 -10  -4  13   -3.17    1.72
  10   4  13   -0.04    1.76
 -10   4 -13   -0.91    1.58
  10  -4  13    0.73    1.90
 -10   4  13   -1.38    1.91
 -11  -4  13   -3.47    2.01
 -11   4 -13    2.67    2.01
  11   4  13   -1.52    1.73
  11  -4  13   -1.15    1.86
 -11   4  13    0.16    1.96
   0   4 -14   25.40    2.04
   0  -4 -14   24.39    2.03
   0   4  14   27.35    1.96
   0  -4  14   27.74    1.87
  -1   4 -14    1.41    1.23
   1  -4 -14    1.67    1.23
   1   4  14   -0.37    1.05
  -1  -4  14    0.73    0.89
  -1  -4 -14    0.17    1.23
   1  -4  14   -1.29    0.93
   1   4 -14    0.97    1.13
   1   4 -14    0.79    0.98
  -1   4  14   -1.45    1.09
   2  -4 -14   26.35    2.15
  -2  -4  14   29.68    1.92
   2   4  14   25.35    1.88
  -2   4 -14   20.79    1.99
   2  -4  14   24.78    1.92
  -2   4  14   24.60    1.99
   2   4 -14   26.32    1.97
  -2  -4 -14   26.09    2.10
   2   4 -14   25.25    1.75
   3   4  14   -0.84    1.05
   3  -4 -14    0.97    1.29
  -3  -4  14    1.29    1.18
  -3   4 -14   -0.61    1.15
  -3   4  14   -1.87    1.25
   3   4 -14    1.60    0.97
   3   4 -14    0.74    1.07
  -3  -4 -14    0.56    1.32
   3  -4  14    1.82    1.15
  -4   4 -14   34.50    2.46
  -4  -4  14   40.77    2.38
   4  -4 -14   36.86    2.51
   4   4  14   40.67    2.28
   4   4 -14   33.72    2.12
  -4  -4 -14   37.60    2.52
  -4   4  14   34.62    2.40
   4   4 -14   36.83    2.14
   4  -4  14   40.83    2.50
  -5   4 -14    0.44    1.37
  -5  -4  14    0.43    1.37
   5  -4 -14   -1.08    1.38
   5  -4  14    0.21    1.31
   5   4 -14   -0.64    0.99
  -5  -4 -14   -0.49    1.26
   5   4 -14   -0.19    0.98
  -5   4  14    0.25    1.36
  -6  -4  14    3.12    1.62
   6   4  14    1.12    1.06
   6  -4 -14   -0.60    1.30
  -6   4 -14    1.88    1.49
   6  -4  14    2.50    1.49
  -6   4  14    5.83    1.63
  -6  -4 -14    4.83    1.65
  -7   4 -14   -0.02    1.46
   7  -4 -14    0.47    1.31
   7   4  14   -0.21    1.10
  -7  -4  14    0.69    1.49
  -7  -4 -14    0.61    1.52
   7  -4  14   -2.29    1.29
  -7   4  14   -0.03    1.50
  -8  -4  14   -0.83    1.59
   8   4  14    0.14    1.30
  -8   4 -14    1.27    1.53
  -8  -4 -14    0.27    1.49
   8  -4  14   -3.53    1.30
  -8   4  14    1.06    1.63
  -9  -4  14   -0.12    1.88
  -9   4 -14    1.71    1.69
   9   4  14    1.57    1.59
  -9   4  14   -1.44    1.65
   9  -4  14    1.72    1.71
 -10   4 -14    8.21    2.00
  10   4  14    9.50    2.05
 -10  -4  14    7.81    2.20
 -10   4  14    8.16    2.18
  10  -4  14    9.92    2.32
 -11   4 -14   -3.75    1.77
  11   4  14   -0.74    1.67
  11  -4  14    0.86    2.13
   0   4 -15   -1.46    1.18
   0   4  15    0.87    1.18
   0  -4  15    0.98    1.00
   0  -4 -15    0.01    1.27
  -1   4 -15   26.91    2.21
  -1  -4  15   30.46    1.93
   1   4  15   28.94    2.06
   1  -4 -15   30.67    2.34
  -1  -4 -15   24.80    2.28
   1   4 -15   29.87    1.96
   1   4 -15   27.74    2.18
   1  -4  15   29.48    1.99
  -1   4  15   26.16    1.99
   2   4  15    1.76    1.19
  -2   4 -15    0.16    1.30
  -2  -4  15   -1.49    0.93
  -2  -4  15    1.47    1.14
   2  -4 -15   -0.93    1.27
   2   4 -15    0.58    1.27
   2  -4  15   -1.53    1.04
   2   4 -15    0.42    0.98
  -2  -4 -15   -2.23    1.18
  -2   4  15    0.74    1.20
  -3   4 -15    3.45    1.51
   3   4  15    4.09    1.31
  -3  -4  15    5.85    1.34
   3  -4 -15    7.04    1.74
   3   4 -15    5.13    1.32
   3   4 -15    4.56    1.15
   3  -4  15    7.22    1.42
  -3   4  15    6.86    1.51
  -3  -4 -15    3.38    1.59
   4  -4 -15   -0.29    1.29
  -4   4 -15   -0.90    1.32
  -4  -4  15   -0.62    1.27
  -4  -4 -15   -0.66    1.43
   4   4 -15    0.43    0.97
  -4   4  15   -2.02    1.34
   4   4 -15   -0.28    1.04
   4  -4  15    2.94    1.41
  -5  -4  15   28.43    2.24
   5  -4 -15   27.14    2.30
  -5   4 -15   24.42    2.32
  -5   4  15   23.56    2.27
   5  -4  15   23.71    2.15
  -5  -4 -15   23.04    2.32
   6  -4 -15   -1.47    1.39
  -6   4 -15   -0.50    1.46
  -6  -4  15    0.08    1.52
  -6   4  15    0.89    1.52
  -6  -4 -15    1.12    1.53
   6  -4  15   -0.39    1.41
  -7  -4  15    0.41    1.65
  -7   4 -15   -1.58    1.40
   7  -4 -15    1.50    1.48
  -7  -4 -15   -1.99    1.52
   7  -4  15    1.12    1.65
  -7   4  15    0.43    1.58
  -8   4 -15    0.77    1.57
  -8  -4  15   -0.47    1.62
  -8  -4 -15    0.02    1.55
   8  -4  15    1.13    1.76
  -8   4  15    2.29    1.74
   9   4  15    2.17    1.66
  -9  -4  15    3.30    2.08
  -9   4 -15    1.98    1.64
  -9   4  15    5.89    2.14
   9  -4  15    4.80    1.88
  10   4  15    0.77    1.69
 -10  -4  15   -2.16    1.82
 -10   4 -15    3.69    1.95
 -10   4  15    1.25    1.98
  10  -4  15    1.28    2.07
 -11   4 -15   -2.54    1.94
  11   4  15    3.50    2.01
   0   4 -16   17.79    1.97
   0  -4 -16   20.46    2.13
   0   4  16   18.51    1.84
   0  -4  16   18.16    1.68
   1   4  16    0.52    1.19
  -1   4 -16   -0.66    1.31
   1  -4 -16    0.57    1.42
  -1  -4  16    1.95    1.09
   1  -4  16    0.26    0.98
   1   4 -16    0.19    1.21
  -1  -4 -16    2.84    1.49
  -1   4  16    3.07    1.29
   2  -4 -16   16.55    1.99
  -2   4 -16   14.25    1.91
   2   4  16   15.39    1.80
   2   4 -16   15.33    1.57
   2  -4  16   16.69    1.75
  -2   4  16   12.92    1.66
   2   4 -16   14.07    1.87
  -2  -4 -16   14.39    1.94
   3  -4 -16    0.14    1.37
  -3   4 -16    1.08    1.41
  -3  -4  16    1.22    1.26
   3  -4  16   -0.55    1.14
  -3   4  16   -0.07    1.38
   3   4 -16    0.03    1.23
  -3  -4 -16   -1.16    1.39
   4  -4 -16    1.16    1.52
  -4  -4  16    3.35    1.48
  -4   4 -16    5.10    1.71
   4   4 -16    1.28    1.21
   4  -4  16    3.01    1.44
  -4   4  16    3.40    1.52
  -4  -4 -16    3.91    1.77
  -5  -4  16   -0.80    1.45
   5  -4 -16   -0.28    1.43
  -5   4 -16    0.48    1.52
   5  -4  16    1.16    1.50
  -5   4  16   -0.97    1.43
  -5  -4 -16    1.10    1.67
  -6   4 -16    6.89    1.95
  -6  -4  16    9.41    1.93
   6  -4 -16    8.55    1.89
   6  -4  16    8.26    1.84
  -6  -4 -16    9.24    1.96
  -6   4  16    7.50    1.92
  -7   4 -16   -3.06    1.45
   7  -4 -16    0.01    1.48
  -7  -4  16    2.14    1.79
  -7  -4 -16    0.71    1.55
  -7   4  16   -0.94    1.64
   7  -4  16    0.26    1.71
  -8  -4  16    4.33    2.10
  -8   4 -16    2.18    1.73
   8  -4  16    4.83    1.85
  -8  -4 -16    2.77    1.85
  -8   4  16    0.55    1.76
  -9   4 -16   -0.38    1.64
  -9  -4  16   -0.81    1.87
   9  -4  16    0.32    1.87
  -9   4  16   -0.07    2.05
 -10   4 -16    6.67    2.15
   0   4  17   -1.48    1.19
   0  -4 -17   -1.82    1.41
   0   4 -17    2.99    1.53
   1  -4 -17    1.95    1.57
  -1   4 -17    2.05    1.54
   1   4  17    1.03    1.35
   1   4 -17    1.45    1.57
  -1  -4 -17    0.84    1.41
  -1   4  17    3.01    1.31
   1  -4  17    2.92    1.17
   2  -4 -17   -3.62    1.49
  -2   4 -17    0.68    1.59
  -2   4  17    0.24    1.37
   2   4 -17    1.41    1.37
   2  -4  17    0.54    1.13
  -2  -4 -17   -1.56    1.43
   3  -4 -17   -0.22    1.49
  -3   4 -17    2.11    1.56
   3   4 -17   -1.10    1.34
   3  -4  17    0.03    1.17
  -3   4  17    0.68    1.34
  -3  -4 -17   -0.45    1.46
   4  -4 -17    3.63    1.76
  -4   4 -17    1.03    1.60
  -4  -4 -17    3.16    1.76
  -4   4  17    2.62    1.54
   4   4 -17    2.85    1.32
   4  -4  17    3.06    1.44
  -5   4 -17    6.05    1.85
   5  -4 -17    5.83    1.89
  -5  -4  17    8.66    1.86
  -5  -4 -17    4.43    1.78
  -5   4  17    5.13    1.74
   5  -4  17    7.00    1.68
  -6  -4  17   -0.20    1.72
   6  -4 -17   -2.80    1.61
  -6   4 -17    0.29    1.64
   6  -4  17    0.29    1.62
  -6  -4 -17    1.02    1.74
  -6   4  17   -2.39    1.53
  -7  -4  17   -0.51    1.68
   7  -4 -17    0.06    1.62
  -7   4 -17    1.22    1.84
   7  -4  17   -0.29    1.73
  -7   4  17   -0.44    1.75
  -7  -4 -17   -1.55    1.80
  -8   4 -17    0.62    1.74
  -8  -4  17    2.26    2.06
  -8  -4 -17   -0.56    1.80
  -8   4  17   -2.09    1.92
   8  -4  17    0.59    1.69
  -9  -4  17    3.35    2.09
  -9   4 -17    4.53    2.03
   9  -4  17    2.41    2.02
   0   4  18    8.97    1.72
   0   4 -18    5.58    1.71
   0  -4 -18    8.97    2.06
  -1   4 -18    1.35    1.55
   1  -4 -18    0.74    1.65
  -1  -4 -18   -0.13    1.60
  -1   4  18   -1.08    1.36
   1   4 -18   -0.44    1.52
  -2   4 -18    9.09    2.04
   2  -4 -18    6.49    1.86
   2   4 -18    4.31    1.63
  -2   4  18    7.90    1.78
  -2  -4 -18    4.37    1.74
   3  -4 -18   -0.71    1.65
  -3   4 -18    0.68    1.68
  -3  -4 -18    2.47    1.84
  -3   4  18   -1.01    1.46
   3   4 -18   -0.81    1.47
   3  -4  18   -0.01    1.17
   4  -4 -18   11.65    2.25
  -4   4 -18    9.93    2.09
  -4  -4 -18    9.78    2.04
   4   4 -18    8.21    1.77
   4  -4  18    9.25    1.73
  -4   4  18   12.54    2.09
  -5   4 -18   -0.78    1.76
   5  -4 -18   -1.62    1.46
  -5   4  18    1.32    1.66
  -5  -4 -18    0.30    1.65
   5  -4  18    1.55    1.43
  -6   4 -18    1.67    1.75
   6  -4 -18    3.48    1.86
  -6  -4  18    0.60    1.83
  -6  -4 -18    2.94    1.99
  -6   4  18    2.75    1.75
   6  -4  18    4.70    1.64
  -7  -4  18   -0.09    1.95
  -7   4 -18    2.92    2.01
  -7   4  18    2.60    1.96
   7  -4  18    1.25    1.79
  -7  -4 -18    4.40    1.95
  -8  -4  18    5.46    2.16
  -8   4 -18    7.65    2.18
   8  -4  18    4.12    2.14
  -8  -4 -18    1.76    1.86
  -8   4  18    9.02    2.68
   0   4 -19   -2.33    1.53
   0  -4 -19    1.11    1.71
  -1   4 -19    6.73    2.08
   1  -4 -19    8.22    2.01
  -1  -4 -19    6.80    1.94
  -1   4  19    5.01    1.75
   1   4 -19    3.22    1.74
  -2   4 -19   -1.44    1.56
   2  -4 -19   -0.29    1.70
  -2   4  19    0.29    1.60
  -2  -4 -19   -1.69    1.61
   2   4 -19   -1.83    1.49
  -3   4 -19   11.64    2.30
   3  -4 -19   11.97    2.31
   3   4 -19    7.11    1.86
  -3   4  19    7.85    1.88
  -3  -4 -19   12.79    2.20
   4  -4 -19   -0.27    1.60
  -4   4 -19   -3.01    1.78
  -4   4  19    0.02    1.73
   4   4 -19   -1.63    1.38
  -4  -4 -19   -3.71    1.58
  -5   4 -19   -0.86    1.80
   5  -4 -19    3.26    2.00
  -5  -4 -19    5.08    2.03
  -5   4  19   -0.10    1.83
  -6   4 -19    0.02    2.00
   6  -4 -19    0.94    1.89
   6  -4  19    1.61    1.67
  -6  -4 -19    0.45    1.84
  -6   4  19   -1.35    1.70
  -7  -4  19   -0.39    2.01
   7  -4  19   -0.19    1.85
  -7  -4 -19    0.64    2.04
  -7   4  19    1.58    1.85
  -8  -4 -19   -0.87    1.95
   0  -4 -20   11.70    2.36
   1  -4 -20    0.38    1.89
  -1   4 -20   -1.22    1.63
   1   4 -20   -1.89    1.64
  -1  -4 -20    0.18    1.77
   2  -4 -20   -0.81    1.75
  -2   4 -20    0.95    1.74
  -2  -4 -20    3.43    1.92
   2   4 -20    4.76    1.98
  -2   4  20    2.04    1.66
   3  -4 -20   -0.32    1.73
  -3   4 -20    0.16    1.77
  -3  -4 -20    1.34    1.83
  -3   4  20   -1.00    1.71
   3   4 -20   -0.25    1.66
   4  -4 -20   -1.02    1.93
  -4   4 -20   -2.73    1.92
  -4   4  20    3.17    1.85
  -4  -4 -20   -1.40    1.99
  -5   4 -20   -2.36    1.94
   5  -4 -20   -2.10    1.86
  -5   4  20   -1.63    1.77
  -5  -4 -20   -1.08    1.85
   6  -4 -20    8.59    2.34
  -6   4  20   12.01    2.32
   0  -4 -21    0.57    1.81
   0   4 -21    0.70    1.93
  -1   4 -21   -0.44    1.73
   1  -4 -21   -1.94    1.71
   1   4 -21   -1.92    1.82
  -1  -4 -21   -2.74    1.90
   2  -4 -21   -3.42    1.61
  -2   4 -21    0.25    1.80
   2   4 -21    0.85    1.87
  -2  -4 -21   -1.60    1.77
   3  -4 -21   -1.53    1.73
   3   4 -21   -0.15    1.83
   4  -4 -21   -4.36    1.81
  -4   4  21   -1.86    1.77
  -5   4  21    2.34    2.11
   0   5   0   -0.49    0.48
   0   5   0   -0.25    0.51
   0   5   0   -0.99    0.43
  -1   5   0   -0.26    0.44
   1   5   0   -0.52    0.42
  -1   5   0   -0.17    0.42
   1   5   0    0.17    0.54
   1   5   0    0.12    0.49
  -1   5   0   -0.36    0.54
  -2   5   0  128.39    2.72
   2   5   0  130.28    3.01
   2  -5   0  130.90    2.83
  -2   5   0  130.09    3.01
   2   5   0  128.82    2.49
   2   5   0  125.98    2.93
  -3  -5   0    0.29    0.27
  -3   5   0    0.13    0.69
  -3  -5   0    0.08    0.61
   3  -5   0    0.06    0.56
  -3   5   0    0.89    0.51
   3   5   0    0.30    0.64
   3   5   0    0.55    0.62
   4   5   0    1.54    0.68
   4  -5   0    2.60    0.70
  -4  -5   0    1.50    0.74
  -4   5   0    0.48    0.56
  -4   5   0    1.86    0.75
   4   5   0    2.53    0.78
  -5   5   0   -0.64    0.66
  -5   5   0   -0.32    0.59
  -5  -5   0    0.49    0.78
   5  -5   0    0.30    0.74
   5   5   0    0.31    0.73
  -6  -5   0   83.01    2.88
  -6   5   0   83.01    2.52
   6  -5   0   84.00    2.77
   6   5   0   81.35    2.84
  -6   5   0   81.54    2.65
   7  -5   0    1.88    1.03
  -7   5   0    0.34    0.70
  -7  -5   0    2.31    0.97
   7   5   0   -0.92    0.81
  -7   5   0   -1.06    0.73
  -8   5   0    6.47    1.10
   8   5   0    8.42    1.32
   8  -5   0    8.41    1.32
  -8   5   0    5.30    1.05
  -8  -5   0    4.99    1.18
   9  -5   0    0.56    1.12
   9   5   0   -0.13    1.10
  -9   5   0    0.81    0.93
  -9  -5   0   -0.97    1.12
  -9   5   0   -0.03    0.93
 -10   5   0   17.95    1.69
 -10  -5   0   17.49    1.89
 -10   5   0   18.23    1.63
  10  -5   0   14.21    1.71
  10   5   0   15.72    1.86
  11  -5   0    2.70    1.55
 -11  -5   0    0.70    1.40
  11   5   0   -1.11    1.30
  12   5   0    0.16    1.54
 -12  -5   0    2.28    1.55
  12  -5   0   -1.20    1.60
  13   5   0    0.86    1.83
 -13  -5   0   -2.29    1.55
  13  -5   0    1.41    1.74
  14   5   0   -3.09    1.65
  14  -5   0    1.72    1.89
 -14  -5   0   -0.05    1.75
   0   5  -1    0.45    0.46
   0   5   1   -0.70    0.49
   0   5  -1   -0.86    0.49
   0   5  -1   -0.86    0.48
   0   5   1   -0.31    0.39
   0   5   1   -0.45    0.49
   1   5   1  253.54    4.50
  -1   5  -1  235.22    4.64
   1   5   1  241.97    4.53
  -1   5  -1  228.71    4.33
  -1   5  -1  234.99    4.68
   1   5   1  243.14    4.73
   1   5  -1  241.31    4.39
  -1   5   1  238.94    4.71
  -1   5   1  236.21    4.58
   1   5  -1  233.54    4.69
   1   5  -1  245.84    4.65
  -1   5   1  242.37    4.40
   2  -5  -1   -0.40    0.43
   2   5   1   -0.21    0.59
   2   5   1    0.31    0.55
  -2  -5   1    0.78    0.62
  -2   5  -1   -0.59    0.58
  -2   5  -1    0.11    0.38
  -2   5   1    0.14    0.47
  -2   5   1   -0.13    0.57
   2   5  -1    0.10    0.64
   2   5  -1   -0.19    0.35
   2   5  -1    0.58    0.55
  -2  -5  -1   -0.29    0.39
   2  -5   1    0.39    0.56
   3   5   1   28.17    1.37
   3  -5  -1   30.10    1.19
  -3   5  -1   31.31    1.05
   3   5   1   30.10    1.32
  -3   5  -1   31.36    1.38
  -3  -5   1   31.06    1.38
  -3  -5  -1   30.65    0.88
  -3   5   1   30.16    1.22
   3  -5   1   30.00    1.27
   3   5  -1   28.62    1.35
  -3   5   1   28.44    1.33
   4   5   1   10.88    0.99
   4  -5  -1   11.92    0.91
  -4  -5   1   13.10    1.07
   4   5   1   10.16    1.01
  -4   5  -1   12.61    0.77
  -4   5  -1   12.71    1.01
  -4  -5  -1   11.76    0.53
  -4  -5  -1   11.12    1.02
  -4   5   1   12.43    0.91
   4  -5   1   11.29    0.96
  -4   5   1   11.88    1.02
   4   5  -1   12.65    1.04
  -5  -5   1   84.13    2.72
   5  -5  -1   80.52    2.47
  -5   5  -1   80.81    2.22
  -5   5  -1   83.73    2.57
   5   5   1   79.92    2.63
  -5   5   1   80.64    2.52
  -5  -5  -1   82.09    2.64
  -5  -5  -1   84.53    1.69
   5   5  -1   78.93    2.62
  -5   5   1   83.81    2.43
   5  -5   1   81.55    2.58
  -6   5  -1   -0.87    0.56
   6  -5  -1    0.34    0.80
   6   5   1    1.26    0.83
  -6  -5   1   -0.31    0.83
  -6   5  -1   -0.82    0.78
   6   5  -1    1.60    0.91
  -6   5   1    0.20    0.71
  -6   5   1    0.28    0.69
  -6  -5  -1    1.01    0.86
   6  -5   1   -0.59    0.75
   7  -5  -1   85.36    2.93
   7   5   1   83.47    3.06
  -7   5  -1   83.72    2.61
  -7   5  -1   85.62    2.83
  -7  -5   1   81.51    3.02
  -7   5   1   84.31    2.78
   7  -5   1   86.55    3.05
  -7   5   1   82.92    2.78
   7   5  -1   84.85    3.07
  -7  -5  -1   89.61    3.11
   8  -5  -1   -0.38    1.02
  -8   5  -1   -1.49    0.81
  -8   5  -1    0.27    0.76
   8   5   1   -1.99    0.89
  -8  -5   1   -0.64    0.96
   8  -5   1    0.40    1.01
  -8   5   1    1.58    0.86
  -8  -5  -1   -0.56    0.99
   8   5  -1   -0.50    0.96
  -8   5   1   -0.53    0.86
  -9  -5   1   12.45    1.64
   9  -5  -1   14.26    1.54
  -9   5  -1   11.50    1.27
   9   5   1   12.68    1.59
  -9   5  -1   11.40    1.38
   9   5  -1   13.28    1.61
  -9   5   1   11.44    1.33
   9  -5   1    9.94    1.50
  -9   5   1   12.83    1.44
  -9  -5  -1   14.38    1.66
 -10   5  -1    0.52    1.03
  10  -5  -1    0.29    1.32
  10   5   1   -0.34    1.23
 -10  -5   1   -1.30    1.22
 -10   5  -1   -2.18    1.09
 -10   5   1    0.17    1.01
 -10  -5  -1    1.54    1.30
  10   5  -1   -0.74    1.19
  10  -5   1    1.43    1.46
 -10   5   1    0.10    1.07
 -11  -5   1    3.29    1.67
  11   5   1    5.42    1.62
  11  -5  -1    5.87    1.52
 -11  -5  -1    7.01    1.61
  11   5  -1    3.88    1.66
  11  -5   1    6.00    1.60
 -11   5   1    6.85    1.44
  12  -5  -1   -2.43    1.36
  12   5   1   -0.64    1.61
 -12  -5   1   -1.15    1.44
 -12  -5  -1    0.39    1.65
  12   5  -1   -1.68    1.51
  12  -5   1    0.54    1.73
 -13  -5   1   10.38    2.02
  13  -5  -1    5.31    1.91
  13   5   1    4.65    1.87
 -13  -5  -1    8.87    2.07
  13   5  -1    2.28    1.87
  13  -5   1    3.98    1.99
 -14  -5   1   -4.58    1.86
  14   5   1    0.90    2.05
  14  -5  -1   -0.75    1.87
  14   5  -1    3.54    1.93
 -14  -5  -1    1.47    1.67
  14  -5   1    2.94    1.99
  15  -5  -1   15.40    2.77
   0   5   2   -0.63    0.52
   0   5  -2   -0.52    0.50
   0   5  -2   -0.47    0.40
   0   5   2   -0.25    0.34
   0   5  -2   -0.44    0.55
   0   5   2   -0.17    0.49
   1   5   2    8.54    0.62
  -1   5  -2    7.76    0.52
   1   5   2    9.37    0.80
  -1   5  -2    8.25    0.77
  -1  -5   2    7.58    0.69
   1  -5  -2    8.70    0.50
  -1   5  -2    8.28    0.76
   1   5  -2    8.25    0.71
   1   5  -2    8.16    0.62
   1   5  -2    6.90    0.75
  -1   5   2    8.05    0.72
  -1   5   2    7.72    0.48
  -1   5   2    8.31    0.77
  -1  -5  -2    8.02    0.66
   2  -5  -2    0.88    0.43
   2   5   2   -0.12    0.48
  -2   5  -2    0.90    0.33
  -2   5  -2   -0.11    0.56
  -2  -5   2    0.44    0.57
   2   5   2   -1.17    0.59
  -2   5   2    1.54    0.56
  -2   5   2    0.64    0.60
   2   5  -2    0.88    0.58
   2  -5   2    0.89    0.57
  -2  -5  -2    0.30    0.47
   2   5  -2    0.35    0.37
   3   5   2    1.01    0.67
  -3   5  -2    0.56    0.64
  -3  -5   2    0.36    0.63
   3  -5  -2    0.53    0.50
   3   5   2    1.11    0.59
  -3   5  -2    0.36    0.33
   3   5  -2    0.64    0.23
   3  -5   2    0.67    0.62
  -3   5   2    1.25    0.62
  -3  -5  -2    1.09    0.43
   3   5  -2    0.87    0.62
  -3   5   2    0.47    0.65
   4   5   2    0.67    0.63
  -4  -5   2   -0.49    0.68
   4   5   2    0.22    0.72
  -4   5  -2    0.77    0.41
   4  -5  -2    0.52    0.57
  -4   5  -2    0.44    0.65
  -4  -5  -2    0.49    0.41
  -4   5   2    0.99    0.69
  -4   5   2    0.98    0.66
   4   5  -2    0.49    0.66
   4  -5   2    0.76    0.68
   5  -5  -2    2.40    0.75
   5   5   2    3.54    0.83
  -5   5  -2    3.12    0.56
   5   5   2    3.63    0.92
  -5  -5   2    1.74    0.84
  -5   5  -2    2.61    0.85
  -5   5   2    2.65    0.82
  -5   5   2    2.90    0.72
   5  -5   2    1.94    0.82
   5   5  -2    1.76    0.80
  -5  -5  -2    1.74    0.45
  -5  -5  -2    2.65    0.84
  -6   5  -2   11.99    1.13
  -6   5  -2   11.37    0.89
  -6  -5   2   10.57    1.21
   6  -5  -2    9.35    1.02
   6   5   2    9.28    1.13
  -6   5   2   10.80    1.05
  -6  -5  -2   10.44    1.15
  -6  -5  -2   10.59    0.66
   6   5  -2   10.32    1.17
   6  -5   2   10.01    1.16
  -6   5   2    9.40    1.09
  -7  -5   2    0.50    0.93
   7   5   2    0.04    0.89
  -7   5  -2   -0.12    0.75
   7  -5  -2    0.65    0.85
  -7   5  -2    1.31    0.67
   7   5  -2    1.29    0.90
   7  -5   2    0.53    0.91
  -7   5   2    0.25    0.79
  -7  -5  -2    0.73    0.98
  -7   5   2   -0.05    0.75
  -8  -5   2    3.81    1.19
   8   5   2    5.19    1.20
   8  -5  -2    5.17    1.11
  -8   5  -2    3.29    1.02
  -8   5  -2    3.21    0.83
   8  -5   2    4.13    1.30
  -8   5   2    5.25    0.98
  -8  -5  -2    4.60    1.20
   8   5  -2    4.81    1.16
  -8   5   2    3.41    1.09
  -9  -5   2    1.57    1.25
   9   5   2    2.28    1.21
  -9   5  -2    1.00    0.98
   9  -5  -2    3.15    1.23
  -9   5  -2    1.11    0.89
  -9   5   2    2.76    1.13
   9   5  -2   -1.93    1.13
   9  -5   2    1.42    1.22
  -9   5   2    2.49    1.06
  -9  -5  -2    0.08    1.23
  10   5   2   10.30    1.69
 -10   5  -2   10.84    1.48
  10  -5  -2    9.46    1.54
 -10  -5   2    7.87    1.64
 -10   5   2    6.34    1.38
  10  -5   2    9.71    1.75
  10   5  -2    9.90    1.63
 -10  -5  -2   10.43    1.63
  11  -5  -2   -0.65    1.31
 -11  -5   2   -0.18    1.43
  11   5   2   -0.40    1.32
 -11   5   2   -0.10    1.28
 -11  -5  -2    3.59    1.62
  11   5  -2   -0.56    1.35
  11  -5   2   -1.28    1.52
  12  -5  -2    2.01    1.58
 -12  -5   2    1.30    1.73
  12   5   2    2.03    1.75
  12  -5   2   -0.86    1.50
 -12  -5  -2    2.76    1.69
 -12   5   2    2.11    1.47
  12   5  -2    1.39    1.48
  13  -5  -2   -1.72    1.63
  13   5   2   -1.57    1.71
 -13  -5   2    0.15    1.87
 -13  -5  -2    0.58    1.72
  13   5  -2   -2.69    1.55
  13  -5   2    1.56    1.88
  14   5   2    0.11    1.83
 -14  -5   2   -0.95    1.82
  14  -5  -2    1.87    1.91
  14   5  -2   -0.20    1.96
 -14  -5  -2    5.57    2.02
  14  -5   2   -0.80    1.97
   0   5   3    0.47    0.55
   0  -5  -3   -0.40    0.52
   0  -5   3   -0.04    0.40
   0   5  -3    0.25    0.56
   0   5  -3   -0.78    0.52
   0   5   3    0.32    0.30
  -1   5  -3   38.32    1.43
   1  -5  -3   37.27    1.42
   1   5   3   41.61    1.17
  -1  -5   3   40.24    1.33
   1   5   3   39.86    1.50
   1  -5  -3   40.03    0.89
  -1   5  -3   39.15    0.97
  -1   5  -3   40.26    1.53
   1   5  -3   37.96    1.45
   1   5  -3   40.98    1.29
  -1   5   3   37.22    1.43
  -1   5   3   39.81    1.48
  -1  -5  -3   40.42    1.35
  -2   5  -3    0.22    0.21
   2   5   3   -0.08    0.62
   2   5   3   -0.52    0.50
  -2  -5   3    0.39    0.61
  -2   5  -3    0.33    0.64
   2  -5  -3    0.57    0.36
  -2  -5  -3    0.77    0.53
  -2   5   3    0.31    0.59
   2  -5   3    0.01    0.60
  -2   5   3   -0.11    0.60
   2   5  -3    0.87    0.67
   2   5  -3    0.59    0.43
  -3   5  -3   85.02    1.69
  -3   5  -3   81.82    2.44
   3   5   3   83.47    2.32
  -3  -5   3   83.18    2.43
   3   5   3   81.93    2.45
   3  -5  -3   85.79    1.98
   3   5  -3   85.00    1.77
   3  -5   3   82.17    2.45
  -3   5   3   82.41    2.37
  -3  -5  -3   87.26    2.08
   3   5  -3   80.37    2.44
  -3   5   3   82.93    2.43
   4   5   3    3.77    0.82
  -4  -5   3    2.63    0.84
   4   5   3    2.97    0.75
  -4   5  -3    3.16    0.83
  -4   5  -3    3.85    0.42
   4  -5  -3    3.28    0.61
   4  -5   3    3.62    0.80
   4   5  -3    2.56    0.73
  -4  -5  -3    3.68    0.57
  -4   5   3    3.25    0.75
  -4   5   3    2.61    0.72
  -5   5  -3  143.60    3.06
   5  -5  -3  148.23    3.49
   5   5   3  136.32    3.78
   5   5   3  146.32    3.82
  -5  -5   3  145.54    3.89
  -5   5  -3  144.80    3.73
  -5   5   3  148.20    3.76
   5   5  -3  145.08    3.88
  -5  -5  -3  140.32    3.05
  -5   5   3  145.07    3.73
   5  -5   3  144.07    3.88
  -6   5  -3   -0.56    0.50
   6  -5  -3   -0.57    0.63
   6   5   3    0.79    0.93
  -6  -5   3    1.62    0.90
   6   5   3    0.16    0.84
  -6   5  -3   -1.09    0.78
  -6  -5  -3    1.59    0.90
  -6   5   3   -0.08    0.77
   6  -5   3    0.39    0.92
  -6  -5  -3    0.13    0.48
   6   5  -3   -0.55    0.73
  -6   5   3   -0.75    0.67
  -7   5  -3   20.59    1.17
   7  -5  -3   18.97    1.38
  -7  -5   3   15.87    1.51
   7   5   3   17.83    1.55
  -7   5  -3   19.73    1.47
  -7  -5  -3   20.96    1.54
   7  -5   3   19.66    1.60
  -7   5   3   20.77    1.45
  -7   5   3   21.29    1.57
   7   5  -3   18.64    1.53
  -8   5  -3    0.68    0.74
   8  -5  -3    1.39    0.96
   8   5   3    1.15    1.14
  -8   5  -3    0.34    0.90
  -8  -5   3    0.89    1.10
   8  -5   3   -0.61    1.11
  -8   5   3    0.17    0.84
   8   5  -3    1.58    1.03
  -8  -5  -3   -0.46    1.01
  -8   5   3    1.60    1.09
   9  -5  -3   20.75    1.76
  -9  -5   3   21.97    1.99
   9   5   3   20.58    1.91
  -9   5  -3   20.79    1.67
  -9   5   3   20.39    1.77
   9   5  -3   22.43    1.93
  -9   5   3   22.42    1.68
  -9  -5  -3   21.86    1.87
   9  -5   3   21.61    1.97
 -10   5  -3    1.74    1.11
  10  -5  -3   -0.24    1.23
  10   5   3   -1.20    1.22
 -10  -5   3   -0.25    1.26
 -10  -5  -3    2.85    1.40
  10   5  -3   -1.06    1.18
  10  -5   3   -0.54    1.27
 -10   5   3   -0.86    1.11
 -11  -5   3   19.73    2.19
  11   5   3   22.78    2.28
  11  -5  -3   23.73    2.14
 -11  -5  -3   21.35    2.18
 -11   5   3   22.45    2.15
  11   5  -3   17.72    2.07
  11  -5   3   18.77    2.18
  12   5   3    0.36    1.51
  12  -5  -3    2.12    1.60
 -12  -5   3   -0.61    1.73
 -12  -5  -3    1.47    1.63
 -12   5   3   -2.01    1.35
  12  -5   3   -0.57    1.52
  12   5  -3   -0.01    1.65
 -13  -5   3    4.02    2.09
  13   5   3    5.18    1.85
  13  -5  -3    3.86    1.80
  13   5  -3    3.23    1.83
 -13   5   3    3.84    1.77
 -13  -5  -3    6.94    1.74
  13  -5   3    6.30    2.09
 -14  -5   3   -1.98    1.89
  14   5   3   -1.99    1.90
  14   5  -3    0.56    1.79
 -14  -5  -3    2.16    1.75
  14  -5   3    2.71    1.88
   0  -5  -4   -0.81    0.62
   0   5   4    0.06    0.25
   0   5  -4    0.03    0.64
   0   5  -4    0.04    0.55
   0  -5   4    0.03    0.41
   0   5   4    0.13    0.60
   1   5   4    1.92    0.67
   1  -5  -4    2.34    0.71
  -1  -5   4    3.43    0.59
  -1   5  -4    2.67    0.69
  -1   5  -4    2.37    0.68
   1   5   4    3.10    0.46
  -1  -5  -4    2.19    0.61
   1   5  -4    2.15    0.58
   1  -5   4    2.50    0.32
   1   5  -4    0.77    0.59
  -1   5   4    2.80    0.67
   2  -5  -4   22.54    0.62
  -2  -5   4   22.52    1.13
  -2   5  -4   23.21    1.25
   2   5   4   23.23    1.02
   2   5   4   21.23    1.22
   2  -5  -4   21.04    1.19
  -2   5   4   22.39    1.23
   2   5  -4   21.94    0.95
  -2  -5  -4   22.53    1.08
  -2   5   4   22.22    1.20
   2   5  -4   21.57    1.22
   2  -5   4   20.43    1.19
  -3   5  -4   10.55    0.98
   3   5   4   11.66    0.91
   3  -5  -4   10.76    0.61
   3  -5  -4   10.75    0.95
  -3  -5   4   12.40    1.01
   3   5   4   10.89    1.03
   3   5  -4   11.63    0.99
   3   5  -4   11.50    0.64
  -3   5   4   11.23    0.98
  -3  -5  -4   11.67    0.82
   3  -5   4   10.94    1.02
  -3   5   4   10.13    0.98
   4  -5  -4   26.90    1.10
  -4   5  -4   27.04    0.80
   4   5   4   29.69    1.46
  -4   5  -4   27.71    1.48
  -4  -5   4   28.02    1.52
   4   5   4   27.85    1.50
   4   5  -4   27.94    1.52
  -4  -5  -4   26.54    1.18
   4   5  -4   26.85    0.88
  -4   5   4   28.17    1.45
  -4   5   4   26.98    1.46
   4  -5   4   26.18    1.51
  -5  -5   4   11.01    1.16
   5   5   4   12.00    1.16
   5   5   4   10.63    1.13
   5  -5  -4   10.55    0.88
  -5   5  -4   12.50    1.13
  -5   5  -4   11.90    0.67
   5   5  -4   11.65    1.14
  -5   5   4   11.24    1.10
  -5   5   4   11.49    1.12
   5  -5   4   11.33    1.18
   5   5  -4   12.08    0.50
  -5  -5  -4   10.82    0.83
   6   5   4   47.58    2.16
  -6   5  -4   48.18    2.10
   6   5   4   46.33    2.11
   6  -5  -4   46.54    1.83
  -6   5  -4   48.55    1.54
  -6  -5   4   46.86    2.18
  -6  -5  -4   50.34    2.14
  -6  -5  -4   47.79    1.61
   6   5  -4   49.36    2.20
   6  -5   4   48.41    2.24
  -6   5   4   50.31    2.07
  -6   5   4   48.45    2.16
   7   5   4    0.36    0.93
  -7   5  -4    0.64    0.88
   7  -5  -4    0.60    0.77
  -7  -5   4   -0.88    0.91
   7  -5   4    0.00    0.93
  -7   5   4    0.82    0.80
   7   5  -4   -0.39    0.83
  -7   5   4    0.26    0.97
  -7  -5  -4    0.73    0.95
   8   5   4    1.72    1.12
  -8   5  -4    0.59    0.97
   8  -5  -4    3.01    0.96
  -8  -5   4    2.33    1.16
  -8   5   4    4.33    0.99
   8   5  -4    3.05    1.11
   8  -5   4    1.25    1.09
  -8  -5  -4    2.55    1.14
  -8   5   4    3.37    1.19
  -9  -5   4    0.42    1.24
   9   5   4    3.24    1.31
   9  -5  -4    2.82    1.14
  -9   5  -4    4.06    1.18
   9  -5   4    1.93    1.31
  -9  -5  -4    0.18    1.10
  -9   5   4    2.95    1.02
   9   5  -4    1.11    1.27
  -9   5   4    2.58    1.31
  10  -5  -4    2.04    1.24
 -10   5  -4   -0.59    1.08
 -10  -5   4   -0.04    1.33
  10   5   4   -0.01    1.31
 -10   5   4    1.24    1.28
  10   5  -4   -0.22    1.20
  10  -5   4    0.09    1.36
 -10  -5  -4    0.44    1.17
 -11  -5   4    3.12    1.60
  11   5   4    4.30    1.63
  11  -5  -4   -1.89    1.20
  11   5  -4    0.32    1.39
 -11   5   4    0.27    1.46
  11  -5   4   -2.85    1.51
 -11  -5  -4    2.30    1.52
 -12  -5   4    8.64    2.00
  12   5   4    6.09    1.80
  12  -5  -4    9.44    1.82
  12  -5   4    9.40    2.21
  12   5  -4    7.39    1.92
 -12   5   4   11.00    2.05
 -12  -5  -4    7.70    1.82
 -13  -5   4    0.16    1.94
  13   5   4    3.48    1.81
 -13  -5  -4   -2.55    1.40
  13   5  -4    0.51    1.61
  13  -5   4   -1.98    1.65
 -13   5   4    1.52    1.71
  14   5   4    6.75    2.51
 -14  -5   4    6.49    2.14
  14   5  -4    7.58    2.16
  14  -5   4    3.01    2.25
   0   5   5   -1.02    0.62
   0   5  -5    0.25    0.60
   0  -5   5    0.41    0.44
   0   5  -5   -0.27    0.61
   0   5   5   -0.12    0.23
   0  -5  -5   -0.40    0.66
   1  -5  -5   47.21    1.76
   1   5   5   42.83    1.71
  -1  -5   5   44.74    1.45
  -1   5  -5   44.19    1.74
   1   5   5   45.57    1.26
  -1   5  -5   45.84    1.70
  -1  -5  -5   45.90    1.64
  -1   5   5   45.43    1.73
   1  -5   5   45.66    1.77
   1   5  -5   47.75    1.59
   1  -5   5   45.17    1.04
   1   5  -5   45.63    1.73
  -2   5  -5    0.58    0.67
   2   5   5    1.27    0.52
   2  -5  -5    0.43    0.64
   2   5   5    1.19    0.70
  -2  -5   5    0.83    0.62
   2   5  -5    1.90    0.67
   2   5  -5    1.10    0.53
  -2  -5  -5    0.63    0.65
   2  -5   5    0.35    0.64
  -2   5   5    1.48    0.68
   3   5   5  162.23    3.69
   3  -5  -5  160.74    3.04
  -3  -5   5  154.43    3.78
   3   5   5  160.06    3.90
  -3   5  -5  154.64    3.90
   3  -5  -5  158.23    3.88
   3  -5   5  159.83    3.99
   3   5  -5  158.96    3.94
  -3   5   5  160.20    3.93
  -3  -5  -5  160.67    3.63
   3   5  -5  161.85    3.35
   4   5   5   15.90    1.27
   4  -5  -5   17.84    0.88
  -4  -5   5   18.70    1.30
   4  -5  -5   18.18    1.25
   4   5   5   18.33    1.25
  -4   5  -5   13.33    1.20
   4   5  -5   15.69    1.21
   4  -5   5   15.56    1.29
   4   5  -5   17.85    0.82
  -4  -5  -5   19.61    1.13
  -4   5   5   20.96    1.36
  -4   5   5   19.04    1.34
  -5   5  -5   77.95    2.64
   5   5   5   74.03    2.61
   5  -5  -5   75.92    2.52
   5   5   5   76.57    2.64
  -5   5  -5   78.47    1.75
  -5  -5   5   73.66    2.68
   5  -5  -5   79.56    2.17
  -5  -5  -5   74.73    2.22
   5  -5   5   73.76    2.74
   5   5  -5   76.51    1.80
  -5   5   5   75.83    2.70
   5   5  -5   76.88    2.68
  -5   5   5   79.19    2.61
   6   5   5    1.13    0.87
   6  -5  -5    0.91    0.74
   6  -5  -5    0.57    0.64
   6   5   5    1.61    0.92
  -6  -5   5   -0.15    0.86
  -6   5  -5   -0.43    0.84
  -6   5   5    0.92    0.77
  -6  -5  -5   -0.04    0.63
   6  -5   5    0.77    0.87
   6   5  -5    2.23    0.85
  -6   5   5    0.38    0.87
   7   5   5    2.38    1.08
   7   5   5    1.93    0.99
   7  -5  -5    0.82    0.76
  -7  -5   5    2.35    1.16
  -7   5  -5   -0.83    0.79
   7  -5  -5    1.11    0.81
  -7  -5  -5    0.27    0.69
  -7   5   5    0.66    0.80
   7  -5   5    1.82    1.14
   7   5  -5    0.13    0.88
  -7  -5  -5    1.10    0.97
  -7   5   5    1.26    1.00
   8   5   5    1.34    1.08
   8  -5  -5    1.67    0.90
  -8   5  -5    2.57    1.09
   8  -5  -5   -0.51    0.76
  -8  -5   5    1.36    1.18
   8  -5   5   -0.32    1.01
  -8   5   5    1.52    0.88
  -8   5   5    2.33    1.13
  -8  -5  -5   -0.16    0.92
   8   5  -5    2.72    1.20
   9  -5  -5    5.78    1.28
   9   5   5    7.70    1.53
  -9  -5   5    8.81    1.57
   9  -5  -5    7.19    1.13
  -9   5  -5    7.61    1.33
   9   5  -5    5.43    1.37
   9  -5   5    8.87    1.59
  -9   5   5    5.42    1.47
  -9  -5  -5    7.74    1.47
  -9   5   5    6.48    1.17
  10   5   5    1.48    1.38
 -10  -5   5   -0.04    1.35
 -10   5  -5   -0.87    1.19
  10  -5  -5   -0.75    1.19
  10  -5   5    2.22    1.60
 -10   5   5   -1.48    1.23
 -10  -5  -5   -1.34    1.02
  10   5  -5   -1.85    1.15
  11   5   5   27.00    2.57
 -11  -5   5   27.13    2.61
  11  -5   5   29.18    2.58
 -11   5   5   25.18    2.42
 -11  -5  -5   31.63    2.37
  11   5  -5   28.23    2.40
 -12  -5   5    0.67    1.77
  12   5   5    0.71    1.62
 -12   5   5   -0.54    1.60
 -12  -5  -5    1.28    1.51
  12   5  -5   -0.14    1.45
  12  -5   5    0.28    1.67
 -13  -5   5    5.14    2.15
  13   5   5    3.44    1.78
  13   5  -5    4.74    1.81
  13  -5   5    4.42    1.87
 -13   5   5    5.45    1.97
 -14  -5   5    1.72    2.27
  14   5  -5   -0.06    1.88
 -14   5   5   -3.92    1.82
  14  -5   5   -4.27    1.97
   0   5   6    0.24    0.25
   0   5  -6    0.03    0.62
   0   5   6    0.70    0.69
   0  -5  -6   -0.70    0.64
   0   5  -6   -0.54    0.66
   0  -5   6    0.16    0.44
  -1   5  -6   13.53    1.07
  -1   5  -6   12.34    1.04
   1   5   6   14.55    0.71
   1  -5  -6   11.82    1.04
   1   5   6   14.42    1.11
  -1  -5   6   14.63    0.89
  -1  -5  -6   13.06    1.04
  -1   5   6   12.35    1.05
   1  -5   6   13.52    0.58
   1   5  -6   14.29    1.11
   1   5  -6   13.07    0.98
   1  -5   6   12.17    1.06
  -2   5  -6   10.85    1.02
   2   5   6    9.32    0.73
  -2  -5   6   10.00    0.92
   2  -5  -6    8.39    0.98
   2   5   6    8.22    0.98
   2   5  -6    8.80    0.80
  -2   5   6    8.86    0.98
  -2  -5  -6    8.41    0.89
   2  -5   6    9.28    1.01
   2   5  -6    8.53    0.93
  -3  -5   6    2.18    0.80
   3  -5  -6    0.80    0.76
   3   5   6    0.90    0.59
   3  -5  -6    1.64    0.33
   3   5   6    0.32    0.70
  -3   5  -6    0.92    0.78
   3  -5   6    1.25    0.75
   3   5  -6    1.24    0.54
   3   5  -6    1.45    0.72
  -3   5   6    1.98    0.78
  -3  -5  -6    2.84    0.74
   4  -5  -6    7.68    0.98
   4   5   6    8.54    0.94
   4  -5  -6    8.42    0.64
  -4  -5   6    9.64    1.10
  -4   5  -6    7.24    1.01
   4   5   6    8.28    1.08
  -4  -5  -6    7.96    0.92
   4  -5   6    7.11    1.03
   4   5  -6    9.38    1.04
  -4   5   6    8.95    1.07
   4   5  -6    9.84    0.71
   5   5   6    0.90    0.84
   5   5   6    0.21    0.75
   5  -5  -6    1.59    0.56
  -5   5  -6    0.39    0.77
  -5  -5   6    1.93    0.92
   5  -5  -6    1.81    0.80
  -5  -5  -6    0.75    0.67
  -5   5   6    0.80    0.86
   5   5  -6    0.87    0.42
   5  -5   6    1.21    0.88
   5   5  -6    1.79    0.81
  -6   5  -6   31.31    1.84
   6  -5  -6   31.92    1.45
   6  -5  -6   32.47    1.76
   6   5   6   29.56    1.77
  -6  -5   6   29.45    1.86
   6   5   6   30.76    1.82
   6   5  -6   33.23    1.87
  -6   5   6   31.33    1.87
  -6  -5  -6   34.23    1.56
   6  -5   6   29.39    1.90
  -7  -5   6    0.90    1.06
   7   5   6   -1.25    1.01
  -7   5  -6   -0.56    0.96
   7  -5  -6    0.26    0.76
   7  -5  -6    1.10    0.87
   7   5   6   -0.30    0.85
  -7  -5  -6   -0.96    0.91
  -7  -5  -6    0.45    0.75
   7  -5   6   -0.12    0.97
  -7   5   6    0.76    1.12
   7   5  -6    0.26    0.90
   8  -5  -6    1.80    0.88
  -8  -5   6    1.44    1.24
   8  -5  -6    1.23    0.90
   8   5   6    1.20    1.23
  -8   5  -6   -1.76    0.97
  -8  -5  -6   -0.47    0.92
  -8   5   6    2.34    1.20
   8  -5   6    1.32    1.21
   8   5  -6   -0.43    0.99
  -9   5  -6    1.25    1.03
   9  -5  -6   -1.07    1.08
  -9  -5   6    1.11    1.34
   9  -5  -6    0.97    0.90
   9   5   6    1.35    1.19
  -9   5   6    0.23    1.21
   9   5  -6    0.80    1.15
   9  -5   6    1.27    1.31
  -9  -5  -6    2.15    1.06
 -10  -5   6   -3.20    1.35
  10   5   6   -0.97    1.28
 -10   5  -6   -1.12    1.26
 -10   5   6    1.36    1.36
  10  -5   6    0.38    1.55
 -10  -5  -6   -0.99    1.01
  10   5  -6    1.73    1.40
  11   5   6    2.00    1.64
 -11  -5   6    2.12    1.62
  11  -5   6    1.29    1.64
 -11  -5  -6    0.80    1.32
  11   5  -6    2.07    1.48
 -11   5   6   -1.97    1.53
  12   5   6    9.87    2.03
 -12  -5   6    4.24    1.83
  12   5  -6    4.38    1.71
 -12   5   6    7.39    1.93
  12  -5   6    4.48    2.06
 -13  -5   6    0.28    2.11
  13   5   6    1.17    1.74
  13   5  -6   -3.43    1.57
 -13   5   6    0.47    1.87
  13  -5   6    0.23    1.80
 -14   5   6    0.41    2.04
  14   5  -6   -4.22    1.66
   0  -5   7    0.43    0.46
   0   5  -7   -0.91    0.63
   0   5   7    0.29    0.69
   0  -5  -7    1.27    0.74
   0   5  -7    1.08    0.69
   0   5   7    0.41    0.28
   1   5   7   30.66    1.06
  -1   5  -7   33.29    1.62
   1   5   7   32.25    1.57
  -1  -5   7   29.80    1.26
  -1   5  -7   28.98    1.52
   1  -5  -7   31.41    1.56
   1  -5   7   31.25    0.97
   1   5  -7   30.14    1.45
  -1  -5  -7   29.87    1.55
   1  -5   7   29.53    1.57
  -1   5   7   29.71    1.57
   1   5  -7   27.80    1.49
   2   5   7    7.49    0.97
  -2   5  -7    6.09    1.01
   2   5   7    7.32    0.70
  -2  -5   7    5.58    0.81
   2  -5  -7    7.43    1.00
   2  -5   7    6.45    0.94
   2   5  -7    7.01    0.84
  -2   5   7    5.92    0.94
   2   5  -7    4.40    0.83
  -2  -5  -7    6.24    0.96
  -3   5  -7   52.20    2.13
   3   5   7   48.32    2.03
  -3  -5   7   49.71    1.98
   3  -5  -7   54.30    2.13
   3   5   7   52.73    1.85
  -3   5   7   51.09    2.10
   3  -5   7   49.77    2.11
   3   5  -7   49.99    1.73
  -3  -5  -7   52.80    1.98
   3   5  -7   50.39    2.05
   4  -5  -7    2.69    0.87
  -4   5  -7    1.62    0.85
   4  -5  -7    1.77    0.46
   4   5   7    0.50    0.81
   4   5   7    2.69    0.74
  -4  -5   7    2.51    0.87
  -4   5   7    3.03    0.97
   4  -5   7    1.38    0.88
   4   5  -7    2.17    0.57
   4   5  -7    0.19    0.71
  -4  -5  -7    1.29    0.79
   5   5   7   20.25    1.41
  -5   5  -7   19.73    1.47
  -5  -5   7   17.40    1.47
   5  -5  -7   18.17    0.98
   5  -5  -7   17.59    1.38
   5   5   7   20.26    1.43
   5   5  -7   16.99    1.36
   5   5  -7   19.64    1.00
   5  -5   7   21.05    1.58
  -5   5   7   20.54    1.60
  -5  -5  -7   20.27    1.32
   6  -5  -7    0.88    0.67
   6   5   7    3.48    0.98
  -6  -5   7    3.10    1.17
  -6   5  -7    0.73    0.89
   6  -5  -7    2.20    0.97
   6   5   7    2.76    0.99
  -6  -5  -7    2.73    0.88
   6  -5   7    1.51    1.01
   6   5  -7    2.06    0.99
  -6   5   7    1.52    1.08
  -7   5  -7   29.73    1.89
   7   5   7   30.43    2.05
  -7  -5   7   30.46    2.10
   7  -5  -7   28.91    1.77
   7   5   7   33.84    1.99
  -7  -5  -7   32.17    1.67
  -7   5   7   26.75    1.96
   7  -5   7   30.66    2.11
   7   5  -7   32.00    2.01
  -8   5  -7    0.18    1.11
   8   5   7    2.24    1.22
  -8  -5   7    0.33    1.34
   8   5   7    0.07    1.14
   8  -5  -7    1.93    0.98
   8   5  -7    0.81    1.13
  -8   5   7    2.21    1.25
  -8  -5  -7    0.03    0.98
   8  -5   7    0.33    1.24
   9   5   7   11.73    1.70
  -9  -5   7   14.35    1.86
  -9   5  -7   13.46    1.64
   9  -5  -7   13.76    1.47
  -9   5   7    9.86    1.76
   9  -5   7    9.12    1.73
  -9  -5  -7   13.43    1.57
   9   5  -7   11.19    1.67
 -10   5  -7   -1.98    1.12
  10   5   7    1.67    1.39
 -10  -5   7   -1.45    1.40
 -10  -5  -7   -1.70    1.08
  10  -5   7   -1.47    1.40
 -10   5   7    0.11    1.54
  10   5  -7   -0.44    1.36
 -11  -5   7    5.05    1.81
  11   5   7    6.61    1.87
 -11   5   7   10.25    2.06
 -11  -5  -7    5.87    1.71
  11  -5   7    7.22    2.05
  11   5  -7    6.10    1.62
  12   5   7   -2.64    1.69
 -12  -5   7   -0.13    1.79
 -12   5   7   -3.12    1.53
  12   5  -7   -1.63    1.40
  12  -5   7    0.06    1.74
  13   5   7    0.09    1.94
 -13  -5   7    0.40    1.96
  13  -5   7    0.76    1.96
  13   5  -7   -0.66    1.73
 -13   5   7    2.01    1.89
  14   5  -7   -1.86    1.57
 -14   5   7    0.56    1.97
   0  -5   8    0.39    0.51
   0  -5  -8    1.02    0.82
   0   5  -8    1.56    0.77
   0   5   8    1.19    0.77
   0   5  -8   -0.08    0.67
   0   5   8   -0.02    0.31
   1   5   8   19.41    0.89
   1  -5  -8   20.59    1.39
  -1   5  -8   19.13    1.38
  -1  -5   8   20.14    1.11
   1   5   8   21.15    1.35
  -1   5  -8   22.16    1.42
  -1   5   8   21.75    1.41
   1  -5   8   18.99    0.83
   1  -5   8   21.25    1.38
   1   5  -8   20.17    1.30
  -1  -5  -8   19.98    1.37
   1   5  -8   19.24    1.32
  -2  -5   8    4.15    0.82
   2  -5  -8    4.31    1.03
  -2   5  -8    5.38    1.02
   2   5   8    5.11    0.98
   2   5   8    4.67    0.62
   2  -5   8    5.19    0.38
   2   5  -8    4.32    0.82
  -2   5   8    2.58    0.87
  -2  -5  -8    5.61    0.98
   2   5  -8    4.54    0.86
   2  -5   8    4.84    0.92
  -3  -5   8    9.98    1.10
   3  -5  -8    9.56    0.46
   3  -5  -8    7.85    1.09
   3   5   8    9.20    1.04
   3   5   8    9.29    0.87
  -3   5  -8   10.00    1.16
   3   5  -8   10.45    1.07
   3  -5   8    8.97    1.14
  -3  -5  -8    9.32    1.07
  -3   5   8    9.10    1.13
   3   5  -8    8.62    0.89
   4  -5  -8    1.13    0.87
  -4   5  -8    0.31    0.81
   4   5   8    1.19    0.85
  -4  -5   8    1.23    0.89
   4   5   8   -0.09    0.65
   4   5  -8    0.03    0.53
   4   5  -8    0.63    0.80
  -4  -5  -8    0.74    0.77
  -4   5   8    1.20    0.85
   4  -5   8   -0.45    0.78
  -5  -5   8    1.16    0.92
   5  -5  -8   -1.42    0.79
   5   5   8   -0.83    0.76
  -5   5  -8   -1.33    0.86
   5   5   8    0.42    0.75
   5   5  -8    0.29    0.53
   5   5  -8    0.57    0.85
  -5  -5  -8    0.05    0.82
   5  -5   8    1.30    1.05
  -5   5   8    1.01    0.96
   6   5   8    6.15    1.14
  -6  -5   8    5.27    1.25
  -6   5  -8    6.50    1.18
   6  -5  -8    5.85    1.18
   6   5   8    4.88    1.06
   6   5  -8    5.91    1.12
   6  -5   8    5.53    1.25
  -6  -5  -8    4.22    1.06
  -6   5   8    6.86    1.30
   7   5   8   -0.49    0.99
   7   5   8    1.84    1.10
   7  -5  -8    0.28    0.99
  -7  -5   8    0.95    1.22
  -7   5  -8    0.04    1.01
   7  -5   8   -0.31    1.11
  -7   5   8    0.26    1.16
   7   5  -8   -1.01    0.89
  -7  -5  -8    1.00    1.03
  -8  -5   8   13.90    1.78
   8   5   8   11.14    1.61
   8   5   8    7.84    1.41
   8  -5  -8   10.25    1.31
  -8   5  -8   11.00    1.51
   8   5  -8   12.48    1.57
  -8  -5  -8   11.21    1.38
  -8   5   8   11.54    1.67
   8  -5   8    8.84    1.61
  -9  -5   8   -0.80    1.36
   9   5   8    1.23    1.34
  -9   5  -8    0.04    1.12
   9  -5  -8    0.31    1.07
  -9  -5  -8    0.23    1.02
   9  -5   8   -1.00    1.41
  -9   5   8    0.92    1.41
   9   5  -8   -1.60    1.25
  10   5   8    5.84    1.60
 -10  -5   8    1.84    1.80
 -10   5  -8    2.38    1.32
  10   5  -8    5.64    1.49
 -10   5   8    4.33    1.58
 -10  -5  -8    3.86    1.27
  10  -5   8    2.42    1.58
 -11  -5   8    0.58    1.63
  11   5   8    0.31    1.49
 -11   5  -8   -0.54    1.33
 -11   5   8    1.32    1.82
  11  -5   8    0.21    1.78
  11   5  -8   -2.34    1.38
  12   5   8   -2.07    1.50
 -12  -5   8   -1.57    1.64
 -12   5   8   -0.89    1.75
  12  -5   8   -0.61    1.70
  12   5  -8   -0.96    1.39
  13   5   8   -1.12    1.90
 -13  -5   8    0.60    1.84
  13  -5   8    1.31    1.98
 -13   5   8    0.33    1.85
  13   5  -8   -2.67    1.43
   0  -5  -9    2.56    0.97
   0   5  -9    1.62    0.86
   0   5  -9   -0.90    0.73
   0  -5   9    1.66    0.58
   0   5   9    2.99    0.88
   1   5   9  127.59    3.58
  -1   5  -9  121.94    3.64
   1  -5  -9  130.35    3.72
  -1  -5   9  129.05    3.17
  -1   5  -9  128.36    3.66
   1   5   9  126.29    2.86
   1  -5   9  125.62    2.77
   1   5  -9  121.27    3.49
   1  -5   9  125.42    3.64
  -1  -5  -9  126.95    3.66
  -1   5   9  128.79    3.63
   1   5  -9  129.26    3.61
   2   5   9    1.21    0.54
   2  -5  -9    1.78    0.89
  -2   5  -9    1.46    0.85
  -2  -5   9    1.11    0.74
   2   5   9    0.41    0.74
   2   5  -9    1.47    0.74
  -2   5   9    0.16    0.87
   2  -5   9    0.86    0.81
   2   5  -9    0.78    0.76
   2  -5   9    0.89    0.37
  -2  -5  -9    0.41    0.84
  -3   5  -9    3.98    1.01
   3  -5  -9    3.71    0.99
   3   5   9    5.00    0.99
   3   5   9    5.16    0.76
  -3  -5   9    4.90    0.94
   3   5  -9    5.52    0.91
   3  -5   9    4.93    1.00
  -3  -5  -9    4.86    1.01
   3   5  -9    4.56    0.80
  -3   5   9    3.76    1.00
  -4  -5   9    0.13    0.91
  -4   5  -9   -0.93    0.82
   4   5   9   -0.11    0.64
   4   5   9    0.53    0.86
   4  -5  -9    0.17    0.89
   4   5  -9   -0.38    0.70
  -4   5   9   -0.02    0.88
   4  -5   9    0.24    0.87
   4   5  -9   -0.40    0.56
  -4  -5  -9    0.22    0.90
  -5  -5   9    7.67    1.25
  -5   5  -9    7.42    1.26
   5  -5  -9    7.79    1.22
   5   5   9    7.41    1.15
   5   5   9    8.18    1.13
  -5  -5  -9    7.73    1.12
  -5   5   9    8.40    1.38
   5  -5   9    7.11    1.30
   5   5  -9    6.95    1.11
   5   5  -9    8.42    0.91
   6   5   9   -1.46    0.89
   6  -5  -9    0.59    1.05
  -6   5  -9    0.20    1.08
   6   5   9   -0.41    0.97
  -6  -5   9   -2.46    1.12
  -6  -5  -9   -0.35    0.96
  -6   5   9   -0.24    1.08
   6   5  -9   -1.14    0.83
   6  -5   9   -0.41    1.07
   7   5   9   35.58    2.12
   7   5   9   34.63    2.16
   7  -5  -9   36.68    2.11
  -7   5  -9   34.41    2.25
  -7  -5   9   33.41    2.32
   7  -5   9   36.25    2.40
  -7  -5  -9   31.19    1.91
  -7   5   9   32.48    2.36
   7   5  -9   33.27    2.13
   8   5   9   -1.50    1.22
  -8  -5   9   -1.03    1.32
  -8   5  -9    1.58    1.25
   8  -5  -9    1.19    1.02
   8   5   9   -1.04    1.06
  -8  -5  -9   -1.30    0.94
   8   5  -9    0.69    1.23
   8  -5   9    0.70    1.33
  -8   5   9   -1.17    1.25
  -9   5  -9    7.42    1.50
   9   5   9    9.28    1.78
  -9  -5   9    9.60    1.85
  -9   5   9   12.12    1.89
  -9  -5  -9    9.68    1.41
   9   5  -9   11.26    1.74
   9  -5   9    8.92    1.77
  10   5   9   -1.46    1.51
 -10   5  -9    0.15    1.36
 -10  -5   9    0.75    1.62
  10  -5   9   -1.08    1.52
 -10   5   9   -0.36    1.47
  10   5  -9   -3.17    1.11
  11   5   9    4.14    1.70
 -11   5  -9    0.20    1.40
 -11  -5   9   -1.04    1.64
  11   5  -9    0.26    1.52
 -11   5   9   -1.03    1.57
  11  -5   9   -0.89    1.69
 -12  -5   9    3.25    1.98
  12   5   9   -2.93    1.46
 -12   5   9   -2.40    1.64
  12   5  -9   -0.31    1.66
  12  -5   9   -1.29    1.78
  13   5   9    5.70    2.15
  13   5  -9   10.57    2.05
 -13   5   9    6.42    2.25
   0   5  10    0.15    0.80
   0   5 -10    0.65    0.89
   0  -5  10   -0.15    0.60
   0  -5 -10   -0.20    0.95
   0   5 -10   -0.54    0.76
   1   5  10   -0.23    0.72
   1  -5 -10   -1.64    0.81
  -1   5 -10    1.01    0.88
  -1  -5  10   -0.11    0.64
   1   5  10    0.15    0.45
  -1   5 -10    0.17    0.74
   1   5 -10    0.41    0.80
   1  -5  10   -1.68    0.78
   1   5 -10    0.24    0.76
  -1  -5 -10    0.21    0.88
   1  -5  10    0.51    0.52
  -1   5  10    1.00    0.91
   2   5  10   28.53    1.71
  -2  -5  10   26.66    1.51
  -2   5 -10   24.13    1.72
   2   5  10   25.33    1.25
   2  -5 -10   26.66    1.76
   2  -5  10   25.78    1.65
   2   5 -10   24.57    1.55
  -2   5  10   23.12    1.62
   2   5 -10   27.63    1.60
  -2  -5 -10   24.97    1.68
   3  -5 -10    0.60    0.95
   3   5  10    1.81    0.89
   3   5  10   -0.29    0.60
  -3  -5  10    1.97    0.90
  -3   5 -10    2.12    0.97
  -3   5  10    0.35    0.89
   3   5 -10    2.19    0.81
   3  -5  10   -0.08    0.89
  -3  -5 -10    0.10    0.94
   3   5 -10   -0.97    0.73
   4   5  10   -0.18    0.65
   4  -5 -10    0.44    0.96
  -4  -5  10   -0.34    0.82
   4   5  10   -1.12    0.83
  -4   5 -10   -0.10    0.93
   4   5 -10   -0.90    0.59
  -4   5  10   -0.56    0.93
   4   5 -10   -0.85    0.71
   4  -5  10   -0.41    0.88
  -4  -5 -10   -0.36    0.97
  -5  -5  10    0.12    0.93
   5   5  10   -0.09    0.94
   5   5  10    0.21    0.80
  -5   5 -10   -1.67    0.92
   5  -5 -10   -0.92    1.06
   5   5 -10    0.11    0.70
  -5   5  10    0.06    1.05
   5   5 -10   -0.37    0.89
   5  -5  10    0.25    1.06
  -5  -5 -10    0.16    1.05
  -6  -5  10   10.69    1.53
   6  -5 -10   11.32    1.50
   6   5  10    8.34    1.32
   6   5  10    8.40    1.26
  -6   5 -10    8.18    1.39
   6  -5  10    9.45    1.49
  -6   5  10    8.61    1.48
   6   5 -10    8.42    1.34
  -6  -5 -10    7.48    1.35
  -7  -5  10    1.25    1.34
   7   5  10    2.68    1.13
   7  -5 -10    2.86    1.16
   7   5  10    2.16    1.18
  -7   5 -10    1.27    1.26
  -7  -5 -10    2.48    1.27
   7  -5  10    1.95    1.40
  -7   5  10    0.00    1.25
   7   5 -10    1.78    1.09
  -8   5 -10   12.23    1.63
   8   5  10    8.34    1.56
   8   5  10    8.48    1.46
  -8  -5  10   13.15    1.87
   8  -5 -10    9.63    1.38
  -8   5  10   10.76    1.83
   8   5 -10   10.43    1.65
   8  -5  10   11.56    1.81
  -8  -5 -10   12.09    1.49
   9   5  10    0.21    1.43
  -9   5 -10   -0.78    1.22
  -9  -5  10   -0.10    1.43
  -9   5  10    3.39    1.63
   9  -5  10   -0.85    1.50
   9   5 -10   -0.80    1.12
 -10   5 -10    0.22    1.43
  10   5  10    5.17    1.73
 -10  -5  10    6.08    1.86
 -10   5  10    5.08    1.97
  10  -5  10    6.23    1.97
  10   5 -10    3.83    1.38
  11   5  10   -1.39    1.48
 -11   5 -10   -0.15    1.38
 -11  -5  10   -0.39    1.61
 -11   5  10   -0.90    1.68
  11   5 -10   -3.41    1.38
  11  -5  10   -1.13    1.64
 -12  -5  10   -1.53    1.71
  12   5  10    3.05    1.93
 -12   5  10   -2.89    1.76
  12   5 -10    2.47    1.78
  12  -5  10   -1.02    2.00
   0  -5 -11    2.04    1.03
   0  -5  11    0.99    0.65
   0   5  11   -0.16    0.83
   0  -5  11   -0.13    0.81
   0   5 -11    0.28    0.83
   0   5 -11   -0.97    0.97
  -1  -5  11   50.83    1.96
  -1   5 -11   54.19    2.49
   1  -5 -11   52.81    2.47
   1   5  11   51.04    2.25
  -1  -5 -11   52.12    2.46
   1   5 -11   51.89    2.26
  -1   5  11   52.40    2.34
   1  -5  11   50.64    2.30
   1   5 -11   49.69    2.28
   2   5  11    0.46    0.56
  -2   5 -11    1.81    1.03
   2   5  11    2.27    0.91
  -2  -5  11    1.18    0.80
   2  -5 -11    0.15    0.97
   2  -5  11    0.91    0.92
  -2   5  11    2.20    0.97
  -2  -5 -11    1.70    1.04
   2   5 -11    2.22    0.88
   2   5 -11    3.35    0.91
  -3   5 -11   13.66    1.47
  -3  -5  11   13.03    1.33
   3  -5 -11   12.43    1.46
   3   5  11   12.08    1.34
   3   5  11   11.76    1.06
   3   5 -11   12.70    1.24
  -3  -5 -11   11.47    1.40
  -3   5  11   13.08    1.46
   3   5 -11   11.35    1.22
   3  -5  11   11.97    1.48
   4  -5 -11    3.96    1.27
   4   5  11    3.96    0.91
  -4   5 -11    2.56    1.13
  -4  -5  11    3.47    1.15
   4   5  11    2.25    1.04
   4   5 -11    2.99    0.86
   4   5 -11    3.00    0.99
  -4   5  11    3.50    1.17
   4  -5  11    3.48    1.17
  -4  -5 -11    2.78    1.19
   5   5  11   14.17    1.54
   5  -5 -11   15.13    1.61
   5   5  11   15.27    1.37
  -5   5 -11   16.25    1.67
  -5  -5  11   13.51    1.66
   5   5 -11   15.61    1.51
  -5  -5 -11   13.26    1.62
  -5   5  11   14.09    1.72
   5   5 -11   12.80    1.20
   5  -5  11   12.99    1.69
  -6   5 -11   -0.47    1.26
   6   5  11    1.26    0.97
  -6  -5  11    1.32    1.25
   6  -5 -11    2.09    1.24
   6   5  11    3.57    1.18
  -6  -5 -11    1.67    1.20
   6  -5  11    1.30    1.26
   6   5 -11    2.87    1.18
  -6   5  11    1.15    1.23
  -7  -5  11   19.12    2.10
  -7   5 -11   15.89    1.82
   7   5  11   18.76    1.73
   7   5  11   18.24    1.76
   7  -5 -11   18.56    1.77
   7  -5  11   16.95    1.93
   7   5 -11   14.64    1.63
  -7  -5 -11   17.45    1.80
  -7   5  11   19.94    2.04
   8  -5 -11    0.51    1.13
  -8   5 -11    0.35    1.43
  -8  -5  11   -2.69    1.33
   8   5  11   -0.35    1.12
  -8   5  11   -1.65    1.48
   8  -5  11   -1.32    1.34
  -8  -5 -11    0.25    1.25
   8   5 -11   -0.34    1.09
   9   5  11   12.53    1.95
  -9  -5  11   10.47    2.12
  -9   5 -11   12.09    1.88
   9   5 -11   12.77    1.87
   9  -5  11   12.93    2.14
  -9   5  11   12.08    2.07
 -10  -5  11    0.60    1.65
  10   5  11    1.03    1.46
 -10   5 -11    1.56    1.62
 -10   5  11   -0.53    1.67
  10   5 -11   -1.75    1.37
  10  -5  11   -0.96    1.76
 -11   5 -11    0.75    1.67
  11   5  11   -1.05    1.74
 -11  -5  11    1.88    1.94
  11  -5  11    1.63    1.84
  11   5 -11    2.27    1.70
 -11   5  11    1.66    1.79
  12   5  11    2.67    1.75
 -12  -5  11    0.07    2.13
  12  -5  11   -3.31    1.96
 -12   5  11    0.58    1.81
   0   5 -12    0.42    1.02
   0   5 -12    0.05    0.81
   0  -5  12   -0.03    0.92
   0   5  12    1.49    0.99
   0  -5  12   -0.54    0.71
   0  -5 -12    0.07    1.00
   1  -5 -12    1.70    1.17
  -1   5 -12    3.61    1.26
   1   5  12    2.94    1.08
  -1  -5  12    1.18    0.82
   1   5 -12    3.96    1.01
   1   5 -12    3.75    1.16
   1  -5  12    2.50    1.00
  -1  -5 -12    1.69    1.15
  -1   5  12    2.41    1.04
   2  -5 -12    3.26    1.22
  -2  -5  12    3.48    1.02
  -2   5 -12    3.87    1.18
   2   5  12    0.46    1.02
   2  -5  12    2.80    1.12
   2   5 -12    2.57    0.99
  -2   5  12    2.47    1.07
   2   5 -12    2.84    0.95
  -2  -5 -12    4.05    1.30
   3  -5 -12    1.80    1.19
  -3  -5  12    1.93    1.04
  -3   5 -12    2.02    1.12
   3   5  12    0.09    1.01
   3   5 -12    1.94    0.88
   3   5 -12    1.07    0.89
  -3   5  12    0.65    1.08
  -3  -5 -12    0.90    1.26
   3  -5  12    0.45    1.02
  -4  -5  12    5.17    1.20
   4  -5 -12    1.98    1.33
   4   5  12    3.73    1.18
   4   5  12    4.84    0.99
  -4   5 -12    4.64    1.32
   4  -5  12    5.21    1.27
  -4  -5 -12    0.88    1.28
  -4   5  12    5.00    1.31
   4   5 -12    4.29    0.98
   4   5 -12    2.87    1.05
  -5   5 -12   -1.51    1.16
   5  -5 -12    1.43    1.21
  -5  -5  12    1.83    1.28
   5   5  12    0.71    0.91
   5   5  12    0.90    1.10
  -5   5  12    1.54    1.26
   5   5 -12    1.71    0.94
   5  -5  12    1.60    1.24
  -5  -5 -12   -0.23    1.22
   6   5  12    6.26    1.23
  -6   5 -12    6.92    1.53
  -6  -5  12    9.29    1.67
   6   5  12    7.60    1.46
   6  -5 -12    5.64    1.50
  -6   5  12    6.36    1.60
  -6  -5 -12    5.82    1.46
   6  -5  12    5.22    1.47
   6   5 -12    4.18    1.25
  -7   5 -12   -1.34    1.32
  -7  -5  12    2.61    1.50
   7   5  12    1.15    1.14
   7  -5 -12    2.30    1.27
   7   5 -12   -1.69    1.05
  -7  -5 -12    0.91    1.27
   7  -5  12   -0.63    1.40
  -7   5  12    1.64    1.42
  -8   5 -12    2.56    1.52
  -8  -5  12    2.28    1.62
   8  -5 -12    0.61    1.18
   8   5  12    1.66    1.30
   8   5 -12    1.10    1.27
  -8   5  12   -3.16    1.39
   8  -5  12    3.63    1.72
  -8  -5 -12    2.26    1.43
   9   5  12   -3.86    1.37
  -9  -5  12    1.60    1.75
  -9   5 -12   -0.75    1.48
  -9   5  12   -0.88    1.57
   9   5 -12    1.90    1.42
   9  -5  12    0.71    1.52
 -10  -5  12    0.60    1.94
  10   5  12    0.27    1.61
 -10   5 -12    0.60    1.48
 -10   5  12    0.21    1.88
  10   5 -12   -2.24    1.42
  10  -5  12    2.91    1.80
 -11  -5  12    0.19    2.02
  11   5  12   -1.77    1.74
 -11   5 -12    1.62    1.66
 -11   5  12   -0.59    2.00
  11  -5  12   -1.09    1.79
  12   5  12    1.35    1.67
   0   5 -13    0.56    1.16
   0  -5  13    1.25    0.98
   0   5 -13   -0.27    0.93
   0  -5 -13   -0.83    1.10
   0   5  13    0.23    1.07
  -1   5 -13   19.62    1.82
   1  -5 -13   23.04    1.95
   1   5  13   18.18    1.59
  -1  -5  13   17.00    1.37
   1  -5  13   17.34    1.62
   1   5 -13   19.18    1.62
  -1  -5 -13   21.97    1.88
  -1   5  13   21.79    1.73
   1   5 -13   18.51    1.67
   2   5  13    3.06    1.15
   2  -5 -13    1.63    1.28
  -2   5 -13    0.78    1.25
  -2  -5  13    0.80    1.02
   2   5 -13    1.60    0.97
  -2   5  13    2.03    1.22
   2   5 -13    1.74    1.10
  -2  -5 -13    0.66    1.22
   2  -5  13    1.28    1.03
   3   5  13   37.27    2.19
  -3  -5  13   39.79    2.14
  -3   5 -13   39.32    2.49
   3  -5 -13   40.32    2.44
   3  -5  13   36.09    2.26
  -3  -5 -13   38.50    2.43
  -3   5  13   32.27    2.22
   3   5 -13   40.81    2.15
   3   5 -13   34.33    2.05
   4  -5 -13    0.85    1.27
   4   5  13    0.58    1.12
  -4   5 -13   -0.04    1.22
  -4  -5  13    0.56    1.16
  -4  -5 -13    1.34    1.37
  -4   5  13   -1.31    1.14
   4   5 -13    0.66    0.95
   4  -5  13    1.24    1.15
   4   5 -13    0.38    1.01
   5   5  13    5.48    1.44
  -5  -5  13    2.70    1.41
  -5   5 -13    6.14    1.52
   5   5  13    6.08    1.29
   5  -5 -13    5.59    1.58
  -5   5  13    4.05    1.58
  -5  -5 -13    7.49    1.49
   5  -5  13    5.13    1.54
   5   5 -13    4.72    1.24
   6  -5 -13    0.19    1.23
   6   5  13   -0.05    0.99
  -6   5 -13    0.44    1.32
  -6  -5  13   -0.75    1.43
   6   5  13    1.73    1.27
  -6  -5 -13   -0.08    1.38
  -6   5  13   -0.43    1.31
   6  -5  13   -1.73    1.37
   6   5 -13    1.11    1.11
  -7   5 -13    2.97    1.49
  -7  -5  13   -1.64    1.42
   7  -5 -13    1.77    1.40
   7   5  13    2.61    1.23
   7  -5  13    2.39    1.61
  -7  -5 -13    0.24    1.42
   7   5 -13    1.71    1.22
  -7   5  13    1.77    1.49
   8   5  13   -0.02    1.22
  -8  -5  13   -1.07    1.52
  -8   5 -13   -0.15    1.51
   8  -5 -13    1.08    1.31
  -8   5  13    1.46    1.56
   8  -5  13    0.44    1.61
   8   5 -13   -0.72    1.25
  -8  -5 -13    1.51    1.46
  -9  -5  13    7.05    2.09
   9   5  13    2.33    1.53
  -9   5 -13    6.35    1.86
   9  -5  13    7.93    2.10
  -9   5  13    8.65    2.12
 -10  -5  13    1.15    1.88
  10   5  13   -1.53    1.58
 -10   5 -13   -2.33    1.60
  10  -5  13    0.77    1.73
 -10   5  13    2.26    1.80
 -11  -5  13    6.31    2.42
 -11   5 -13    8.11    2.16
  11   5  13    7.98    2.16
  11  -5  13    5.79    2.16
 -11   5  13    5.90    2.19
   0   5  14   -1.08    1.02
   0  -5 -14    0.12    1.33
   0   5 -14   -0.31    1.12
   0  -5  14   -0.14    0.88
   1  -5 -14    0.70    1.27
  -1  -5  14    1.29    0.97
  -1   5 -14   -0.13    1.17
   1   5  14    0.95    1.06
   1   5 -14    1.60    1.24
  -1  -5 -14    0.27    1.26
   1  -5  14   -0.07    0.98
  -1   5  14   -2.07    1.09
   1   5 -14   -0.71    0.90
   2   5  14   26.08    1.91
  -2  -5  14   26.06    1.74
  -2   5 -14   26.47    2.14
   2  -5 -14   20.87    2.03
  -2   5  14   24.04    1.96
   2   5 -14   25.01    1.80
   2   5 -14   24.14    1.95
  -2  -5 -14   23.36    2.18
   2  -5  14   28.71    2.05
  -3  -5  14   -0.16    1.07
   3   5  14    1.07    1.17
  -3   5 -14    1.46    1.35
   3  -5 -14    0.47    1.41
   3   5 -14    1.68    1.07
   3  -5  14    1.25    1.20
  -3   5  14    0.97    1.23
  -3  -5 -14   -2.98    1.27
   3   5 -14    1.05    1.02
   4   5  14    0.25    1.18
   4  -5 -14    3.07    1.49
  -4  -5  14    0.76    1.25
  -4   5 -14   -2.73    1.18
  -4   5  14   -0.70    1.36
   4  -5  14    1.82    1.34
   4   5 -14    1.58    1.03
   4   5 -14    0.73    1.02
  -4  -5 -14    1.17    1.36
   5   5  14   -0.88    1.08
  -5  -5  14    0.67    1.33
  -5   5 -14    0.95    1.44
   5  -5 -14   -0.68    1.41
  -5  -5 -14    1.47    1.47
  -5   5  14    0.86    1.40
   5  -5  14    1.40    1.40
   5   5 -14   -0.11    1.04
   6  -5 -14   24.79    2.32
  -6  -5  14   22.87    2.31
  -6   5 -14   28.44    2.47
  -6  -5 -14   28.63    2.28
  -6   5  14   29.27    2.47
   6   5 -14   28.04    2.09
   6  -5  14   21.50    2.19
  -7  -5  14   -0.49    1.47
   7  -5 -14    1.28    1.45
  -7   5 -14    2.70    1.68
  -7   5  14    0.34    1.49
   7   5 -14    1.28    1.30
  -7  -5 -14    0.84    1.53
   7  -5  14    1.11    1.49
   8   5  14    2.15    1.28
   8  -5 -14    0.21    1.41
  -8  -5  14   -1.29    1.75
  -8   5 -14    0.70    1.66
   8  -5  14   -0.98    1.67
  -8   5  14    2.03    1.81
  -8  -5 -14    2.29    1.68
  -9   5 -14    1.94    1.79
  -9  -5  14   -1.31    1.72
   9   5  14   -0.32    1.51
  -9   5  14    0.61    1.81
   9  -5  14   -2.39    1.72
  10   5  14    1.33    1.71
 -10  -5  14    0.72    1.96
 -10   5 -14   -0.64    1.54
 -10   5  14    2.33    2.08
  10  -5  14   -0.84    1.68
 -11   5 -14    0.25    1.88
  11   5  14    1.58    1.87
   0  -5 -15    1.54    1.36
   0   5 -15    1.96    1.36
   0   5  15    0.23    1.07
   0  -5  15   -1.06    1.00
   1  -5 -15   17.38    1.93
  -1   5 -15   14.60    1.86
  -1  -5  15   18.18    1.66
   1   5  15   17.02    1.78
  -1  -5 -15   15.25    1.90
  -1   5  15   13.31    1.68
   1   5 -15   17.91    1.85
   1   5 -15   15.27    1.61
   1  -5  15   14.09    1.62
   2  -5 -15   -0.11    1.38
   2   5  15   -0.09    1.18
  -2   5 -15   -0.60    1.27
   2   5 -15   -1.33    0.93
  -2   5  15    0.42    1.14
   2   5 -15    2.59    1.35
   2  -5  15    0.57    1.16
  -2  -5 -15   -1.88    1.31
   3   5  15   28.18    2.09
  -3  -5  15   31.74    2.15
   3  -5 -15   26.11    2.27
  -3   5 -15   25.25    2.35
   3   5 -15   27.17    2.06
   3  -5  15   25.67    2.16
  -3   5  15   27.98    2.30
  -3  -5 -15   24.80    2.24
   3   5 -15   28.46    1.96
   4   5  15    1.17    1.28
   4  -5 -15    1.32    1.42
  -4  -5  15    2.44    1.38
  -4   5 -15    2.61    1.44
  -4  -5 -15    1.83    1.49
   4   5 -15    0.59    1.08
   4  -5  15    2.34    1.46
  -4   5  15    4.57    1.52
   4   5 -15    1.78    1.11
   5  -5 -15    3.16    1.69
  -5  -5  15    3.79    1.46
  -5   5 -15    4.63    1.65
   5  -5  15    6.89    1.63
  -5   5  15    3.84    1.72
  -5  -5 -15    8.68    1.82
   5   5 -15    2.32    1.27
   6  -5 -15   -1.75    1.49
  -6  -5  15    1.60    1.42
  -6   5 -15   -1.97    1.49
  -6  -5 -15   -0.10    1.53
   6  -5  15    1.74    1.43
  -6   5  15    0.29    1.67
  -7  -5  15   -0.06    1.68
   7  -5 -15   -0.04    1.46
  -7   5 -15   -1.19    1.45
  -7  -5 -15    0.56    1.60
  -7   5  15    0.47    1.55
   7  -5  15   -0.25    1.59
  -8  -5  15    2.25    1.88
  -8   5 -15    1.12    1.67
   8  -5  15   -0.40    1.56
  -8   5  15    1.56    1.72
  -8  -5 -15    0.70    1.60
  -9   5 -15    1.41    1.67
  -9  -5  15    0.32    1.99
   9  -5  15    3.65    1.82
  -9   5  15    1.84    1.99
 -10   5 -15   -1.52    1.58
 -10  -5  15   -2.80    1.85
  10  -5  15   -2.60    1.70
 -10   5  15    2.05    1.92
 -11   5 -15    5.59    2.19
   0   5  16   -1.40    1.17
   0  -5  16    0.46    1.02
   0  -5 -16   -0.70    1.36
   0   5 -16   -0.57    1.28
   1   5  16   -1.02    1.21
  -1  -5  16    0.48    0.98
  -1   5 -16    0.36    1.41
   1  -5 -16   -2.62    1.42
  -1  -5 -16   -1.25    1.36
   1  -5  16   -0.19    1.09
  -1   5  16    0.36    1.31
   1   5 -16    0.07    1.05
   1   5 -16   -0.59    1.33
   2  -5 -16   -0.79    1.39
  -2  -5  16    0.94    0.96
   2   5  16   -0.02    1.25
  -2   5 -16   -2.31    1.26
   2   5 -16    2.22    1.20
  -2  -5 -16    0.52    1.43
   2  -5  16    0.74    1.28
   2   5 -16    2.02    1.28
  -2   5  16    0.06    1.23
   3  -5 -16    1.74    1.50
   3   5  16    0.74    1.33
  -3   5 -16    1.30    1.56
  -3  -5 -16    0.32    1.46
   3   5 -16    0.49    1.14
  -3   5  16    1.37    1.48
   3   5 -16    0.79    1.08
   3  -5  16    0.12    1.30
   4  -5 -16    3.15    1.69
  -4   5 -16    3.01    1.60
  -4  -5  16   -0.98    1.37
   4   5 -16    0.17    1.07
  -4  -5 -16    1.84    1.64
  -4   5  16    0.27    1.49
   4  -5  16   -0.79    1.37
  -5  -5  16    2.48    1.60
   5  -5 -16    0.32    1.46
  -5   5 -16   -1.90    1.40
   5  -5  16    0.26    1.51
  -5  -5 -16   -1.58    1.53
  -5   5  16    1.71    1.54
  -6  -5  16   -0.16    1.61
  -6   5 -16   -1.03    1.49
   6  -5 -16   -2.81    1.52
  -6   5  16   -0.91    1.53
  -6  -5 -16   -2.27    1.54
   6  -5  16   -0.22    1.55
  -7  -5  16    1.87    1.65
   7  -5 -16    1.12    1.66
  -7   5 -16    1.07    1.61
  -7   5  16   -2.02    1.61
  -7  -5 -16   -0.96    1.63
   7  -5  16    0.34    1.68
  -8   5 -16   -0.60    1.67
  -8  -5  16   -0.44    1.67
  -8   5  16   -4.58    1.53
  -8  -5 -16   -0.73    1.69
   8  -5  16    2.03    1.88
  -9  -5  16   -3.00    1.94
  -9   5 -16    0.09    1.86
  -9   5  16   -0.81    1.76
   9  -5  16    2.44    2.06
 -10   5 -16    2.20    1.99
   0  -5  17   -0.09    1.13
   0   5  17    1.26    1.41
   0   5 -17   -0.66    1.35
   0  -5 -17    0.88    1.50
  -1   5 -17    5.66    1.74
  -1  -5  17    7.59    1.50
   1   5  17    8.51    1.63
   1  -5 -17    6.15    1.79
  -1   5  17    8.67    1.68
   1  -5  17    8.29    1.43
  -1  -5 -17    6.37    1.74
   1   5 -17    4.56    1.64
  -2   5 -17   -0.89    1.38
   2  -5 -17    2.08    1.72
   2   5  17    1.77    1.36
   2  -5  17    1.30    1.26
   2   5 -17   -2.46    1.33
  -2  -5 -17   -1.46    1.41
  -2   5  17    2.22    1.38
  -3   5 -17    1.06    1.58
   3  -5 -17    8.09    1.95
  -3   5  17    8.04    1.69
  -3  -5 -17    6.58    1.79
   3   5 -17    5.87    1.58
   3  -5  17    4.06    1.46
  -4   5 -17    0.12    1.54
   4  -5 -17    1.12    1.68
  -4  -5 -17   -0.13    1.57
   4   5 -17   -2.02    1.16
   4  -5  17    0.09    1.43
  -4   5  17    0.82    1.44
  -5   5 -17    3.95    1.92
  -5  -5  17   10.03    1.90
   5  -5 -17    5.29    1.84
  -5  -5 -17    9.59    2.05
  -5   5  17    7.66    1.89
   5  -5  17   10.03    1.94
  -6   5 -17    0.02    1.73
   6  -5 -17   -0.62    1.53
  -6  -5  17   -1.98    1.60
  -6   5  17    2.59    1.75
  -6  -5 -17    0.23    1.56
   6  -5  17    0.36    1.69
   7  -5 -17    7.55    1.97
  -7  -5  17    7.86    1.95
  -7   5 -17    6.33    2.10
  -7  -5 -17    7.99    2.15
   7  -5  17    5.98    1.89
  -7   5  17    5.86    2.04
  -8  -5  17    0.97    1.99
  -8   5 -17   -0.37    1.78
  -8   5  17   -0.04    2.05
   8  -5  17    0.52    1.85
  -8  -5 -17   -1.82    1.78
  -9  -5  17    8.16    2.34
  -9   5 -17    8.59    2.20
   9  -5  17    7.38    2.14
   0   5 -18    2.45    1.71
   0   5  18   -1.33    1.38
   0  -5 -18   -0.15    1.74
   1   5  18    2.95    1.57
   1  -5 -18   -1.06    1.58
  -1   5 -18   -1.22    1.55
  -1   5  18    0.89    1.51
  -1  -5 -18   -0.67    1.56
   1   5 -18   -0.67    1.40
   2  -5 -18    5.77    1.85
  -2   5 -18    6.53    1.84
  -2  -5 -18    4.96    1.97
   2  -5  18    7.57    1.57
   2   5 -18    4.10    1.62
  -2   5  18    4.88    1.62
   3  -5 -18   -3.37    1.63
  -3   5 -18   -0.91    1.72
  -3  -5 -18   -1.56    1.69
   3  -5  18   -1.12    1.22
  -3   5  18    3.15    1.66
   3   5 -18   -0.63    1.42
   4  -5 -18   -0.98    1.70
  -4   5 -18   -1.45    1.66
  -4   5  18   -3.25    1.56
   4  -5  18   -0.70    1.38
  -4  -5 -18    0.27    1.82
   5  -5 -18    1.34    1.66
  -5   5 -18    0.89    1.68
  -5  -5 -18    2.35    1.90
   5  -5  18    1.93    1.59
  -5   5  18    2.69    1.85
  -6   5 -18    0.04    1.92
   6  -5 -18    6.89    2.07
  -6   5  18    4.89    2.04
  -6  -5 -18    4.34    1.93
   6  -5  18    2.82    1.88
  -7  -5  18    0.73    1.95
  -7   5 -18    2.17    2.07
   7  -5 -18   -0.26    1.72
  -7   5  18   -1.45    1.86
   7  -5  18   -1.80    1.82
  -7  -5 -18   -1.03    1.89
  -8  -5  18   -3.20    2.00
   8  -5  18    1.76    1.94
  -8  -5 -18   -1.04    1.88
   0   5 -19    1.19    1.61
   0  -5 -19   -1.57    1.79
   0   5  19   -0.34    1.46
   1  -5 -19   13.07    2.29
  -1   5 -19   17.85    2.42
  -1   5  19   16.96    2.13
  -1  -5 -19   17.85    2.38
   1   5 -19   15.88    2.30
  -2   5 -19   -0.19    1.63
   2  -5 -19    1.44    1.78
   2   5 -19   -0.04    1.50
  -2   5  19   -0.04    1.59
  -2  -5 -19    1.44    1.94
  -3   5 -19   -0.75    1.63
   3  -5 -19   -0.82    1.71
  -3  -5 -19    0.66    1.93
   3   5 -19   -0.58    1.53
  -3   5  19    0.11    1.69
   4  -5 -19   -1.26    1.69
  -4   5 -19    1.89    1.80
   4  -5  19    1.95    1.54
  -4  -5 -19    2.27    1.82
  -4   5  19    1.36    1.59
  -5   5 -19    3.11    1.88
   5  -5 -19    0.14    1.90
  -5   5  19    3.52    1.81
   5  -5  19    6.13    1.92
  -5  -5 -19    5.38    2.14
  -6   5 -19   -1.45    1.96
   6  -5 -19   -2.30    1.79
  -6   5  19   -0.14    2.00
   6  -5  19   -1.53    1.73
  -6  -5 -19   -2.60    1.95
   7  -5 -19    8.47    2.47
   7  -5  19    6.65    2.20
  -7  -5 -19    7.63    2.34
   0   5 -20   -0.35    1.75
   0  -5 -20    0.83    1.73
   1  -5 -20   -0.58    1.75
  -1   5 -20   -0.50    1.65
   1   5 -20    2.30    1.91
  -1  -5 -20   -1.18    1.71
   2  -5 -20   -0.06    1.84
  -2   5 -20    1.09    1.85
  -2   5  20    3.78    1.77
   2   5 -20   -0.41    1.72
  -2  -5 -20   -0.36    1.82
   3  -5 -20    0.56    1.80
  -3   5 -20    1.89    1.87
  -3   5  20   -2.55    1.66
   3   5 -20   -2.54    1.59
  -3  -5 -20   -1.41    1.91
   4  -5 -20   -1.87    1.91
  -4   5 -20    1.99    1.89
  -4   5  20   -1.36    1.68
  -4  -5 -20   -3.74    1.87
   5  -5 -20    2.57    2.18
  -5  -5 -20   -0.71    2.07
  -5   5  20    1.22    1.84
   6  -5 -20    2.57    2.00
   0   5 -21   -2.36    1.69
   0  -5 -21   -1.58    1.82
   1  -5 -21    2.36    1.99
  -1   5 -21    0.52    1.93
  -1  -5 -21    0.37    1.89
   1   5 -21    2.21    1.94
   2  -5 -21   -1.01    1.93
  -2   5 -21    1.92    2.07
  -2  -5 -21    0.77    2.03
   2   5 -21   -0.56    1.75
   3  -5 -21   -0.01    2.22
   3   5 -21    1.82    1.96
  -3   5  21    1.16    1.88
  -4   5  21   -2.13    1.81
   0   6   0   14.86    0.86
   0   6   0   15.54    0.84
   0   6   0   14.57    0.88
  -1   6   0   -0.16    0.48
   1   6   0    0.66    0.56
   1   6   0   -0.02    0.50
  -1   6   0   -0.14    0.59
  -1   6   0    0.02    0.49
   1   6   0   -0.05    0.49
  -2   6   0  754.19   12.68
   2   6   0  765.07   12.46
   2  -6   0  740.81   12.84
   2   6   0  735.49   12.97
   2   6   0  750.65   13.05
  -2   6   0  713.79   12.96
   3  -6   0    1.46    0.58
   3   6   0   -0.73    0.57
   3   6   0   -0.71    0.65
  -3   6   0    0.20    0.72
  -3   6   0    0.19    0.49
  -3  -6   0    0.56    0.34
  -4  -6   0    0.61    0.71
   4   6   0   -0.92    0.66
  -4   6   0    0.49    0.52
   4   6   0    0.88    0.77
  -4   6   0   -0.53    0.66
   4  -6   0    0.23    0.65
   5   6   0   -0.05    0.71
  -5   6   0    0.97    0.54
  -5  -6   0   -0.27    0.76
   5  -6   0    0.21    0.67
  -5   6   0   -0.96    0.69
  -6  -6   0  187.55    4.84
  -6   6   0  190.06    4.67
  -6   6   0  191.45    4.36
   6   6   0  189.21    4.84
   6  -6   0  188.64    4.65
   7   6   0   -0.05    0.85
   7  -6   0   -1.41    0.85
  -7   6   0   -0.08    0.84
  -7  -6   0   -0.98    0.90
  -7   6   0    0.16    0.66
   8  -6   0   60.23    2.68
  -8   6   0   59.45    2.50
   8   6   0   57.85    2.73
  -8  -6   0   55.32    2.65
  -8   6   0   59.37    2.35
  -9   6   0    1.48    1.03
   9   6   0    0.84    1.15
   9  -6   0   -1.67    1.10
  -9   6   0   -0.63    0.91
  -9  -6   0    0.87    1.25
  10  -6   0    1.26    1.30
 -10   6   0    0.32    1.04
  10   6   0    1.82    1.37
 -10  -6   0    5.76    1.47
 -10   6   0    4.02    1.22
  11   6   0    1.30    1.40
 -11  -6   0    0.06    1.40
  11  -6   0   -1.63    1.38
 -12  -6   0   -3.80    1.53
  12   6   0   -2.11    1.36
  12  -6   0    2.32    1.65
  13   6   0    0.92    1.72
 -13  -6   0    0.22    1.73
  13  -6   0    0.75    1.79
 -14  -6   0   19.84    2.66
  14  -6   0   21.90    2.74
  14   6   0   20.00    2.64
   0   6  -1    0.48    0.51
   0   6   1    0.53    0.56
   0   6   1    1.77    0.49
   0   6   1    0.54    0.52
   0   6  -1    1.51    0.58
   0   6  -1    1.06    0.52
   1   6   1  223.61    4.21
  -1   6  -1  211.81    4.40
   1   6   1  217.84    4.24
  -1   6  -1  213.09    4.09
  -1   6  -1  217.73    4.39
   1   6   1  219.30    4.46
   1   6  -1  221.12    4.13
   1   6  -1  209.50    4.40
  -1   6   1  217.01    4.12
  -1   6   1  209.22    4.41
   1   6  -1  205.36    4.30
  -1   6   1  213.62    4.31
   2   6   1    2.14    0.52
   2  -6  -1    4.00    0.57
   2   6   1    3.33    0.62
   2   6   1    3.37    0.74
  -2   6  -1    3.28    0.51
  -2   6  -1    0.97    0.72
   2   6  -1    2.27    0.46
  -2   6   1    4.49    0.65
   2  -6   1    3.12    0.67
   2   6  -1    2.47    0.64
  -2   6   1    2.06    0.69
  -2  -6  -1    3.74    0.51
   2   6  -1    4.79    0.76
   3   6   1   57.15    1.92
   3   6   1   57.91    2.01
  -3   6  -1   60.25    2.02
   3  -6  -1   60.46    1.75
  -3  -6   1   55.79    1.95
  -3   6  -1   60.34    1.60
   3  -6   1   59.47    1.92
   3   6  -1   57.84    2.03
   3   6  -1   56.80    1.27
  -3  -6  -1   59.88    1.43
  -3   6   1   61.25    2.05
   3   6  -1   54.52    1.93
  -3   6   1   59.76    1.82
   4   6   1   22.07    1.38
  -4   6  -1   21.28    1.29
  -4  -6   1   22.33    1.35
  -4   6  -1   20.60    0.96
   4  -6  -1   22.20    1.18
   4   6   1   21.77    1.27
  -4   6   1   20.04    1.30
   4   6  -1   20.26    1.29
  -4  -6  -1   19.96    0.71
   4  -6   1   21.22    1.23
  -4   6   1   19.75    1.12
   5  -6  -1    6.48    0.88
  -5  -6   1    5.72    0.99
  -5   6  -1    6.87    0.69
   5   6   1    5.55    0.92
  -5   6  -1    7.80    1.04
   5   6   1    7.26    1.14
  -5   6   1    5.97    0.80
  -5  -6  -1    5.56    0.96
   5   6  -1    4.67    0.90
  -5   6   1    5.80    0.90
  -5  -6  -1    6.29    0.41
   5  -6   1    6.42    0.91
  -6   6  -1    3.51    0.70
  -6  -6   1    3.97    1.04
  -6   6  -1    3.66    1.03
   6  -6  -1    3.05    0.92
   6   6   1    4.65    0.98
   6   6  -1    6.17    1.11
   6  -6   1    6.45    1.09
  -6   6   1    4.98    1.04
  -6  -6  -1    4.25    1.01
  -6   6   1    4.44    0.85
  -7   6  -1    1.29    0.82
  -7  -6   1    2.21    1.03
   7   6   1    4.91    1.10
  -7   6  -1    4.11    0.78
   7  -6  -1    4.97    1.06
   7   6  -1    5.30    1.06
  -7  -6  -1    3.33    1.11
  -7   6   1    2.14    0.90
  -7   6   1    4.46    0.90
   7  -6   1    2.92    1.05
   8   6   1    1.31    1.10
   8  -6  -1    2.49    1.02
  -8   6  -1    1.45    1.02
  -8   6  -1    2.72    0.88
  -8  -6   1   -0.21    1.05
  -8   6   1    0.84    0.96
  -8  -6  -1    1.08    1.20
   8  -6   1    2.08    1.08
  -8   6   1    2.89    0.94
   8   6  -1    0.22    1.02
   9  -6  -1   11.36    1.57
   9   6   1    9.59    1.52
  -9  -6   1    8.72    1.62
  -9   6  -1   10.14    1.26
  -9   6  -1   11.56    1.48
   9   6  -1   11.06    1.55
  -9   6   1   12.39    1.44
  -9  -6  -1   10.71    1.65
  -9   6   1   10.92    1.34
   9  -6   1   10.15    1.60
  10  -6  -1   -0.24    1.28
 -10  -6   1    2.48    1.41
  10   6   1    1.07    1.28
 -10   6  -1    1.14    1.15
 -10   6   1    2.07    1.12
 -10  -6  -1    3.12    1.39
  10  -6   1    1.42    1.46
 -10   6   1    1.73    1.20
  10   6  -1   -0.21    1.22
 -11  -6   1    0.96    1.45
  11  -6  -1    4.32    1.57
  11   6   1    4.29    1.60
 -11   6   1    2.79    1.20
 -11  -6  -1    3.30    1.56
  11  -6   1    6.34    1.74
  11   6  -1    2.27    1.45
  12   6   1    2.17    1.62
  12  -6  -1   -2.03    1.50
 -12  -6   1   -0.04    1.69
 -12  -6  -1   -1.51    1.59
  12  -6   1   -1.48    1.59
  12   6  -1    0.12    1.68
  13  -6  -1   -1.76    1.70
  13   6   1   -1.29    1.78
 -13  -6   1   -1.02    1.83
  13   6  -1    0.07    1.84
 -13  -6  -1    0.69    1.60
  13  -6   1   -3.89    1.69
  14   6   1    0.27    1.85
 -14  -6   1   -2.25    1.75
  14  -6  -1    0.21    1.72
  14   6  -1    2.55    1.95
 -14  -6  -1    2.90    2.02
  14  -6   1    0.07    1.83
   0   6   2   29.62    1.26
   0   6  -2   31.38    1.19
   0   6   2   28.69    0.96
   0   6   2   26.80    1.20
   0   6  -2   26.83    1.21
   0   6  -2   28.66    1.05
   1   6   2   -0.13    0.46
   1   6   2    0.10    0.51
   1   6   2    0.07    0.60
  -1   6  -2    0.10    0.64
  -1   6  -2    0.39    0.42
  -1   6  -2   -0.40    0.56
   1   6  -2    0.44    0.51
  -1   6   2    0.12    0.56
   1   6  -2    0.23    0.46
  -1   6   2   -0.61    0.55
  -1   6   2   -0.52    0.36
   1   6  -2    0.27    0.57
  -1  -6  -2    0.69    0.52
  -2  -6   2  248.58    5.10
   2  -6  -2  257.99    4.70
  -2   6  -2  250.88    5.21
  -2   6  -2  255.22    4.56
   2   6   2  249.47    5.24
   2   6   2  255.98    5.01
   2  -6   2  254.22    5.21
  -2   6   2  252.13    5.09
  -2  -6  -2  259.08    4.81
  -2   6   2  250.18    5.24
   2   6  -2  248.26    5.22
   2   6  -2  256.43    4.62
   2   6  -2  253.58    5.16
   3   6   2    0.38    0.67
  -3  -6   2   -0.45    0.62
  -3   6  -2    0.27    0.70
  -3   6  -2   -0.19    0.30
   3  -6  -2    0.23    0.50
   3   6   2    0.45    0.56
  -3  -6  -2   -0.52    0.42
   3  -6   2    0.45    0.62
   3   6  -2    1.00    0.64
   3   6  -2    0.04    0.26
  -3   6   2   -0.12    0.54
  -3   6   2   -0.31    0.60
  -4  -6   2   92.53    2.81
   4   6   2   91.29    2.69
  -4   6  -2   89.91    2.74
  -4   6  -2   93.53    2.15
   4   6   2   91.67    2.81
   4  -6  -2   90.79    2.41
  -4   6   2   95.17    2.76
   4  -6   2   87.00    2.66
  -4   6   2   89.57    2.57
   4   6  -2   90.88    2.77
  -4  -6  -2   90.45    2.04
   5   6   2    4.85    0.97
  -5   6  -2    5.54    0.60
  -5  -6   2    6.30    1.04
   5  -6  -2    4.08    0.78
   5   6   2    4.04    0.87
  -5   6  -2    5.18    0.90
  -5  -6  -2    5.43    0.98
  -5  -6  -2    4.15    0.50
   5  -6   2    4.33    0.93
  -5   6   2    3.96    0.78
   5   6  -2    6.15    0.98
  -5   6   2    4.06    0.85
  -6   6  -2  150.83    3.50
  -6  -6   2  148.74    4.23
   6  -6  -2  149.09    3.88
   6   6   2  152.40    4.20
   6   6   2  149.58    4.24
  -6   6  -2  151.96    4.05
  -6  -6  -2  155.67    4.19
   6  -6   2  153.65    4.18
  -6  -6  -2  157.45    3.04
  -6   6   2  152.10    3.96
   6   6  -2  155.02    4.26
  -6   6   2  155.20    4.08
   7  -6  -2    1.43    0.85
  -7   6  -2   -1.05    0.74
  -7   6  -2    0.16    0.59
  -7  -6   2   -0.15    0.90
   7   6   2    0.82    0.92
   7  -6   2    2.70    1.10
  -7   6   2    0.79    0.84
   7   6  -2    0.17    0.87
  -7   6   2    0.37    0.76
  -7  -6  -2    0.87    0.95
  -8   6  -2   71.38    2.78
  -8   6  -2   66.45    2.39
   8  -6  -2   67.90    2.74
   8   6   2   71.69    3.02
  -8  -6   2   67.71    2.99
   8  -6   2   70.79    3.01
  -8  -6  -2   66.83    2.93
   8   6  -2   64.09    2.93
  -8   6   2   67.23    2.68
  -8   6   2   65.50    2.63
  -9   6  -2    1.05    1.03
   9   6   2    0.62    1.14
  -9  -6   2   -0.68    1.20
   9  -6  -2   -1.09    1.01
   9   6  -2    2.17    1.31
  -9   6   2    1.24    1.06
  -9  -6  -2    0.28    1.18
  -9   6   2    1.20    1.02
   9  -6   2    0.37    1.34
  10  -6  -2   11.26    1.57
 -10   6  -2   10.66    1.52
  10   6   2    8.38    1.59
 -10  -6   2    7.28    1.63
  10  -6   2   11.41    1.83
 -10   6   2    7.84    1.45
  10   6  -2   11.15    1.81
 -10  -6  -2    8.74    1.62
 -10   6   2    9.78    1.46
  11  -6  -2    1.20    1.40
 -11  -6   2    2.75    1.66
  11   6   2    0.81    1.56
  11  -6   2    1.91    1.53
 -11   6   2    1.24    1.12
  11   6  -2   -1.06    1.34
 -11  -6  -2    0.91    1.57
  12   6   2    4.14    1.67
 -12  -6   2    0.38    1.63
  12  -6  -2    1.14    1.55
  12  -6   2    1.79    1.58
  12   6  -2    1.71    1.61
 -12  -6  -2    0.75    1.65
  13   6   2   -1.10    1.75
 -13  -6   2    0.11    1.69
  13  -6  -2    0.95    1.72
  13   6  -2    1.51    1.74
  13  -6   2   -2.81    1.81
 -13  -6  -2    3.26    1.91
  14   6   2    5.97    2.25
 -14  -6   2    2.72    2.25
 -14  -6  -2    1.54    1.92
  14  -6   2    8.68    2.32
  14   6  -2    5.90    2.08
   0  -6   3    0.53    0.47
   0   6  -3    1.22    0.56
   0   6   3    1.24    0.63
   0   6   3    0.76    0.35
   0   6   3    0.99    0.60
   0  -6  -3   -0.09    0.54
   0   6  -3    0.19    0.46
   0   6  -3   -0.12    0.57
   1   6   3  106.28    2.34
  -1  -6   3  106.51    2.51
  -1   6  -3  102.39    2.13
   1   6   3  105.93    2.77
  -1   6  -3  103.65    2.75
  -1   6  -3  104.68    2.71
  -1   6   3  106.54    2.77
  -1   6   3  108.72    2.75
   1   6  -3  102.25    2.73
  -1   6   3  107.14    2.08
   1   6  -3  109.74    2.48
  -1  -6  -3  106.43    2.59
   2   6   3    1.13    0.56
   2  -6  -3    0.23    0.37
  -2   6  -3    0.62    0.29
  -2   6  -3    1.71    0.71
   2   6   3    1.70    0.72
  -2  -6   3    0.73    0.59
   2   6  -3    0.77    0.43
   2   6  -3    0.91    0.70
  -2   6   3    1.22    0.64
  -2   6   3    0.27    0.58
   2  -6   3    0.10    0.63
  -2  -6  -3    0.95    0.54
   3   6   3    1.01    0.63
  -3  -6   3    0.81    0.69
   3   6   3    0.03    0.68
   3  -6  -3   -0.10    0.44
  -3   6  -3    0.81    0.27
  -3   6  -3    0.14    0.65
  -3  -6  -3    0.87    0.51
   3  -6   3    1.16    0.71
  -3   6   3    0.65    0.66
   3   6  -3    0.07    0.61
  -3   6   3    1.04    0.65
   3   6  -3    0.90    0.33
   4  -6  -3    0.25    0.55
  -4  -6   3   -0.65    0.70
  -4   6  -3    0.03    0.68
  -4   6  -3    0.13    0.32
   4   6   3    0.65    0.78
   4   6   3   -0.15    0.67
  -4   6   3   -0.13    0.69
  -4   6   3    0.18    0.64
   4   6  -3    0.46    0.69
  -4  -6  -3   -0.85    0.46
   4  -6   3    2.15    0.76
   5   6   3   56.27    2.30
  -5  -6   3   52.04    2.20
   5   6   3   56.29    2.20
  -5   6  -3   55.60    1.56
   5  -6  -3   54.06    1.86
  -5   6  -3   58.89    2.22
  -5   6   3   54.69    2.15
   5   6  -3   55.71    2.24
  -5  -6  -3   53.88    1.57
   5  -6   3   55.74    2.24
  -5   6   3   55.00    2.13
  -6  -6   3    0.28    0.87
   6  -6  -3    1.33    0.77
   6   6   3    0.61    0.83
  -6   6  -3    0.36    0.47
   6   6   3    0.28    0.85
  -6   6  -3    1.09    0.82
  -6  -6  -3    1.27    0.49
   6  -6   3   -0.97    0.79
  -6   6   3    2.08    0.83
  -6   6   3    1.12    0.84
  -6  -6  -3   -0.22    0.79
   6   6  -3   -0.72    0.77
  -7   6  -3    7.31    0.82
  -7   6  -3    4.83    1.01
  -7  -6   3    8.07    1.27
   7   6   3    8.06    1.30
   7  -6  -3    8.46    1.05
  -7  -6  -3    6.83    1.16
   7  -6   3    5.70    1.27
   7   6  -3    8.85    1.25
  -7   6   3    8.41    1.17
  -7   6   3    6.73    1.06
   8  -6  -3    2.94    1.03
  -8   6  -3    1.44    0.96
  -8  -6   3    3.79    1.22
   8   6   3    0.32    1.08
   8   6  -3    1.97    1.11
   8  -6   3    0.68    1.07
  -8  -6  -3    0.21    1.03
  -8   6   3    1.31    1.01
  -8   6   3   -0.79    0.91
   9   6   3    0.08    1.17
  -9   6  -3   -1.51    1.00
   9  -6  -3    0.03    1.07
  -9  -6   3   -0.78    1.18
   9  -6   3   -0.34    1.15
  -9   6   3   -0.70    0.95
  -9   6   3    1.75    1.08
  -9  -6  -3    0.86    1.19
   9   6  -3    1.15    1.21
 -10  -6   3    1.00    1.38
 -10   6  -3    3.81    1.33
  10  -6  -3    1.89    1.22
  10   6   3    2.87    1.41
  10  -6   3   -0.51    1.33
 -10   6   3    1.41    1.23
 -10  -6  -3    2.25    1.47
  10   6  -3   -0.71    1.25
 -10   6   3    1.47    1.13
  11  -6  -3    2.36    1.39
  11   6   3   -1.06    1.47
 -11  -6   3    0.19    1.49
  11  -6   3   -0.02    1.53
 -11  -6  -3    0.41    1.48
  11   6  -3    0.89    1.39
 -11   6   3    0.05    1.33
  12   6   3    1.51    1.61
  12  -6  -3   -1.24    1.44
 -12  -6   3    1.21    1.66
  12   6  -3    2.60    1.64
 -12  -6  -3   -0.56    1.48
  12  -6   3    2.98    1.77
 -12   6   3    2.47    1.47
  13   6   3    8.83    2.01
 -13  -6   3    7.98    2.12
 -13  -6  -3    4.19    1.87
  13  -6   3    6.19    2.17
  13   6  -3    4.96    1.93
 -14  -6   3   -3.85    1.78
  14   6  -3   -0.40    1.91
  14  -6   3   -1.21    1.77
 -14  -6  -3    1.52    1.88
   0  -6   4    5.47    0.56
   0   6  -4    4.87    0.73
   0  -6  -4    5.03    0.76
   0   6   4    4.32    0.37
   0   6   4    4.21    0.76
   0   6  -4    4.52    0.76
   1   6   4   -0.18    0.37
   1  -6  -4   -1.02    0.63
  -1  -6   4   -1.22    0.49
   1   6   4   -0.81    0.63
  -1   6  -4    0.96    0.61
  -1   6  -4   -0.76    0.61
  -1   6   4   -0.16    0.60
   1   6  -4    0.42    0.55
   1   6  -4    0.27    0.60
   1  -6   4   -0.01    0.34
  -1   6   4    0.18    0.64
  -1  -6  -4    0.08    0.55
   2   6   4    4.97    0.61
   2  -6  -4    4.55    0.79
  -2   6  -4    4.61    0.80
   2   6   4    7.00    0.89
  -2  -6   4    4.93    0.77
   2  -6  -4    4.94    0.36
   2  -6   4    5.77    0.89
  -2  -6  -4    6.15    0.74
  -2   6   4    3.50    0.75
  -2   6   4    5.83    0.84
   2   6  -4    5.62    0.60
   2   6  -4    4.99    0.80
   3  -6  -4   20.44    0.80
   3   6   4   19.04    1.28
  -3   6  -4   21.00    1.29
  -3  -6   4   21.26    1.28
   3   6   4   19.60    1.12
  -3   6   4   21.56    1.31
  -3   6   4   19.92    1.28
   3  -6   4   19.42    1.26
   3   6  -4   20.56    0.84
  -3  -6  -4   18.82    1.05
   3   6  -4   20.40    1.28
  -4   6  -4  381.16    6.32
  -4  -6   4  369.14    7.55
   4   6   4  366.68    7.55
   4  -6  -4  374.06    6.80
   4   6   4  367.42    7.38
  -4   6  -4  365.01    7.53
   4   6  -4  373.29    7.63
  -4   6   4  361.15    7.44
  -4  -6  -4  365.35    6.88
  -4   6   4  370.22    7.54
   4   6  -4  379.72    6.44
   4  -6   4  359.06    7.57
  -5   6  -4    2.30    0.85
   5   6   4    2.73    0.92
  -5   6  -4    2.57    0.42
   5  -6  -4    1.27    0.62
   5   6   4    4.22    0.96
  -5  -6   4    2.05    0.89
  -5   6   4    2.83    0.84
   5  -6   4    4.23    0.95
  -5  -6  -4    2.90    0.63
   5   6  -4    4.18    0.88
  -5   6   4    2.32    0.87
  -6  -6   4    9.29    1.24
   6  -6  -4    8.42    0.92
  -6   6  -4   10.35    1.16
   6   6   4    8.10    1.23
   6   6   4   10.98    1.22
  -6   6  -4    9.48    0.73
   6  -6   4   11.03    1.28
   6   6  -4    9.92    1.20
  -6   6   4   10.73    1.20
  -6   6   4   10.86    1.21
  -6  -6  -4   10.44    1.27
  -6  -6  -4   11.23    0.85
   7   6   4    2.79    1.06
   7  -6  -4    3.18    0.89
  -7   6  -4    2.38    0.99
   7   6   4    4.00    1.18
  -7  -6   4    1.77    1.05
  -7   6   4    2.71    1.01
   7  -6   4    1.95    1.04
   7   6  -4    2.69    1.01
  -7  -6  -4    2.59    1.11
  -7   6   4    2.93    0.94
   8   6   4   15.56    1.65
  -8   6  -4   21.68    1.71
  -8  -6   4   21.56    1.91
   8  -6  -4   20.44    1.49
   8   6  -4   18.45    1.71
   8  -6   4   17.19    1.81
  -8  -6  -4   17.21    1.64
  -8   6   4   16.08    1.47
  -8   6   4   18.58    1.71
  -9   6  -4    0.36    1.03
   9  -6  -4    1.64    1.07
   9   6   4   -0.53    1.15
  -9  -6   4    2.62    1.35
  -9   6   4    1.57    1.22
  -9  -6  -4   -1.31    1.13
  -9   6   4    0.01    0.92
   9  -6   4    0.29    1.22
   9   6  -4    0.13    1.11
  10   6   4   26.72    2.28
  10  -6  -4   28.58    2.04
 -10   6  -4   25.81    2.02
 -10  -6   4   27.10    2.31
 -10   6   4   28.12    2.15
  10   6  -4   23.84    2.17
  10  -6   4   28.67    2.39
 -10   6   4   24.91    1.84
 -10  -6  -4   26.59    2.17
 -11   6  -4    1.31    1.29
  11  -6  -4   -0.37    1.30
  11   6   4    0.21    1.43
 -11  -6   4   -0.78    1.46
  11   6  -4    1.27    1.43
 -11   6   4    0.90    1.31
 -11  -6  -4    1.83    1.53
  11  -6   4    1.76    1.59
 -12  -6   4   15.02    2.42
  12   6   4   15.16    2.21
 -12   6   4   18.50    2.23
  12  -6   4   16.73    2.33
  12   6  -4   15.32    2.27
 -12  -6  -4   16.29    2.18
  13   6   4   -1.28    1.56
 -13  -6   4   -1.28    1.76
  13  -6   4    0.78    1.73
 -13   6   4   -1.32    1.40
 -13  -6  -4    0.23    1.69
  13   6  -4    0.57    1.83
 -14  -6   4    0.55    2.03
  14  -6   4   -2.97    1.77
  14   6  -4   -2.26    1.68
   0  -6   5   23.34    0.91
   0   6   5   22.97    0.66
   0   6   5   22.71    1.33
   0   6  -5   24.00    1.31
   0   6  -5   21.97    1.22
   0  -6  -5   22.14    1.24
   1  -6  -5   11.70    1.01
  -1  -6   5   11.00    0.81
   1   6   5   11.37    0.63
  -1   6  -5   11.22    1.01
   1   6   5   10.49    1.01
  -1   6  -5   11.39    0.99
   1   6  -5    9.35    0.95
  -1  -6  -5    9.62    0.92
   1  -6   5   11.57    0.53
  -1   6   5   11.78    1.02
   1   6  -5   10.80    0.87
   2   6   5    0.76    0.71
   2   6   5    0.92    0.47
  -2   6  -5    1.51    0.73
   2  -6  -5    0.89    0.68
  -2  -6   5    1.85    0.66
  -2  -6  -5    0.83    0.65
  -2   6   5    0.45    0.68
   2  -6   5    0.30    0.70
   2   6  -5    0.63    0.51
   2   6  -5    1.65    0.74
  -3  -6   5   13.43    1.09
   3  -6  -5   15.76    0.62
   3   6   5   14.14    1.18
   3  -6  -5   15.60    1.17
   3   6   5   14.79    0.98
  -3   6  -5   15.85    1.19
   3   6  -5   15.11    0.82
  -3   6   5   15.28    1.22
  -3  -6  -5   13.62    1.03
  -3   6   5   14.60    1.22
   3  -6   5   13.74    1.14
   3   6  -5   14.88    1.17
   4   6   5   10.99    1.04
   4  -6  -5    9.38    1.05
   4  -6  -5   10.92    0.70
  -4   6  -5   10.14    1.10
   4   6   5   10.89    1.15
  -4  -6   5    9.47    1.09
  -4   6   5   10.52    1.09
  -4   6   5   11.77    1.16
   4  -6   5    9.83    1.12
   4   6  -5   11.49    0.67
   4   6  -5   10.88    1.10
  -4  -6  -5    8.54    0.89
   5   6   5  127.93    3.69
   5  -6  -5  130.17    3.60
  -5  -6   5  129.83    3.73
   5   6   5  130.64    3.60
   5  -6  -5  126.94    2.99
  -5   6  -5  133.92    3.74
  -5   6   5  125.29    3.62
   5   6  -5  123.40    3.69
  -5  -6  -5  126.74    3.12
  -5   6   5  128.03    3.70
   5   6  -5  129.15    2.66
   5  -6   5  124.34    3.74
   6  -6  -5    1.78    0.91
   6   6   5    2.26    0.93
  -6   6  -5    2.36    0.97
  -6  -6   5    1.19    0.95
   6   6   5    1.33    0.87
   6  -6  -5    0.62    0.61
  -6   6   5    2.07    0.96
  -6  -6  -5    1.47    0.68
  -6   6   5    0.77    0.83
   6   6  -5    3.07    0.91
   6  -6   5    1.95    0.98
   7  -6  -5   15.41    1.20
  -7   6  -5   15.07    1.44
   7  -6  -5   12.80    1.30
  -7  -6   5   16.52    1.65
   7   6   5   15.66    1.51
   7   6   5   13.19    1.44
  -7   6   5   14.33    1.31
   7   6  -5   13.53    1.43
   7  -6   5   12.65    1.47
  -7  -6  -5   14.00    1.43
  -7   6   5   14.57    1.47
   8  -6  -5   -0.24    0.89
  -8  -6   5    1.40    1.21
   8   6   5   -1.76    0.99
   8  -6  -5   -0.54    0.83
  -8   6  -5    0.99    1.06
   8   6  -5    1.02    1.06
  -8  -6  -5    1.44    1.07
   8  -6   5    0.08    1.16
  -8   6   5   -1.10    0.84
  -8   6   5    1.04    1.18
   9  -6  -5    0.28    0.88
  -9  -6   5    0.39    1.27
  -9   6  -5   -1.05    1.08
   9  -6  -5   -0.49    1.01
   9   6   5   -1.15    1.11
  -9   6   5    0.66    1.03
  -9   6   5   -1.85    1.22
  -9  -6  -5   -1.62    1.15
   9  -6   5    1.42    1.31
   9   6  -5   -0.79    1.23
 -10  -6   5   -1.27    1.31
 -10   6  -5    0.47    1.17
  10   6   5    0.52    1.45
 -10  -6  -5    1.44    1.27
  10   6  -5    0.90    1.31
  10  -6   5    0.41    1.43
 -10   6   5   -0.07    1.38
  11   6   5    2.53    1.63
 -11  -6   5   -0.82    1.54
 -11   6  -5   -0.55    1.36
  11   6  -5    1.27    1.58
 -11   6   5    0.29    1.61
 -11  -6  -5    5.34    1.49
  11  -6   5    2.78    1.79
 -12  -6   5   -1.30    1.61
  12   6   5   -1.40    1.51
 -12   6   5    0.02    1.57
 -12  -6  -5   -0.56    1.49
  12  -6   5   -0.45    1.65
  12   6  -5   -0.94    1.61
 -13  -6   5   14.98    2.38
  13   6   5    9.73    2.17
 -13  -6  -5   11.12    2.16
 -13   6   5   10.33    2.22
  13   6  -5   14.39    2.39
  13  -6   5   13.36    2.35
  14   6  -5   -2.10    1.74
   0   6   6   99.73    2.89
   0  -6   6  102.13    2.29
   0   6  -6   99.08    2.78
   0   6  -6   97.24    2.89
   0  -6  -6   99.69    2.84
   0   6   6  100.33    1.91
   1   6   6    6.05    0.92
   1   6   6    6.08    0.51
  -1   6  -6    7.73    0.92
  -1  -6   6    5.67    0.71
   1  -6  -6    5.23    0.88
  -1   6  -6    5.45    0.88
  -1   6   6    4.22    0.87
   1  -6   6    7.43    0.47
   1   6  -6    5.45    0.80
   1   6  -6    6.62    0.90
  -1  -6  -6    5.00    0.84
   2   6   6    0.57    0.46
  -2  -6   6    0.99    0.64
   2  -6  -6    1.25    0.78
   2   6   6    1.18    0.76
  -2   6  -6    0.40    0.71
   2  -6   6    1.26    0.75
   2   6  -6    1.20    0.56
  -2  -6  -6    1.66    0.69
  -2   6   6    1.06    0.74
   2   6  -6    1.24    0.73
   3   6   6    3.48    0.95
   3   6   6    2.74    0.65
  -3   6  -6    3.43    0.87
  -3  -6   6    3.80    0.84
   3  -6  -6    4.36    0.88
   3  -6   6    2.51    0.80
  -3  -6  -6    2.42    0.70
   3   6  -6    3.15    0.59
   3   6  -6    3.08    0.82
  -3   6   6    5.19    0.93
   4   6   6   55.10    2.07
   4  -6  -6   58.38    1.51
   4  -6  -6   56.43    2.21
  -4  -6   6   54.87    2.20
   4   6   6   57.26    2.29
  -4   6  -6   55.63    2.26
   4   6  -6   54.66    1.65
   4  -6   6   54.82    2.31
   4   6  -6   59.86    2.35
  -4  -6  -6   57.88    2.01
  -4   6   6   54.20    2.24
  -5  -6   6    0.81    0.88
   5  -6  -6   -0.26    0.75
   5  -6  -6   -0.20    0.48
  -5   6  -6   -0.71    0.76
   5   6   6   -1.03    0.83
   5   6   6   -1.27    0.76
   5   6  -6    0.73    0.41
  -5   6   6   -0.08    0.75
  -5  -6  -6   -1.10    0.62
  -5   6   6   -0.81    0.81
   5  -6   6   -1.25    0.82
   5   6  -6    0.18    0.75
   6   6   6    3.47    0.95
  -6   6  -6    1.24    0.92
  -6  -6   6    1.84    1.03
   6  -6  -6    2.38    0.68
   6   6   6    1.42    0.96
   6  -6  -6    2.48    0.92
  -6   6   6    3.08    0.96
   6  -6   6    3.69    1.17
  -6   6   6    1.69    0.99
   6   6  -6    2.90    0.95
  -6  -6  -6    3.51    0.83
  -7   6  -6    2.20    1.00
   7   6   6    2.10    1.04
  -7  -6   6    2.04    1.18
   7  -6  -6    0.92    0.80
   7   6   6    0.83    1.07
   7  -6  -6    2.52    0.98
   7   6  -6    0.48    0.91
  -7  -6  -6   -0.25    1.06
  -7   6   6    1.59    0.96
  -7   6   6    1.92    1.10
   7  -6   6    4.03    1.22
   8   6   6    5.82    1.42
  -8   6  -6    3.16    1.15
  -8  -6   6    5.00    1.38
   8   6   6    4.52    1.34
   8  -6  -6    4.74    1.14
   8   6  -6    2.69    1.12
  -8  -6  -6    2.93    1.23
  -8   6   6    2.16    1.03
   8  -6   6    2.25    1.31
  -8   6   6    1.88    1.17
   9  -6  -6    1.49    1.04
  -9   6  -6    0.03    1.12
   9   6   6    0.80    1.22
  -9  -6   6   -0.06    1.31
  -9  -6  -6   -0.57    1.01
   9   6  -6   -1.26    1.13
   9  -6   6   -0.02    1.21
  -9   6   6    0.60    1.34
  -9   6   6    1.04    0.95
 -10   6  -6   21.55    1.97
  10   6   6   19.67    2.11
 -10  -6   6   19.50    2.23
  10  -6   6   18.12    2.15
 -10  -6  -6   21.44    1.99
  10   6  -6   21.80    2.09
 -10   6   6   21.93    2.25
 -11  -6   6   -0.30    1.56
  11   6   6    1.02    1.66
 -11   6  -6   -2.26    1.26
  11   6  -6   -1.71    1.50
 -11  -6  -6   -0.83    1.29
 -11   6   6    0.85    1.48
  11  -6   6   -1.46    1.57
 -12  -6   6    6.68    2.08
  12   6   6   12.64    2.19
  12   6  -6   12.19    2.07
  12  -6   6   12.02    2.15
 -12  -6  -6    9.88    1.91
 -12   6   6    9.94    2.15
  13   6   6   -1.71    1.88
 -13  -6   6    0.73    1.82
 -13   6   6   -0.23    1.86
  13  -6   6    3.05    2.19
  13   6  -6    1.85    1.84
 -14   6   6   -1.40    1.92
   0   6   7   23.94    1.43
   0   6  -7   22.07    1.37
   0  -6  -7   24.73    1.45
   0   6  -7   22.46    1.40
   0   6   7   23.38    0.68
   0  -6   7   22.64    0.98
  -1  -6   7   32.84    1.33
   1   6   7   34.24    1.09
   1   6   7   34.32    1.71
  -1   6  -7   31.10    1.65
  -1   6  -7   33.87    1.68
   1  -6  -7   33.91    1.69
   1   6  -7   32.24    1.54
   1  -6   7   33.78    1.69
   1   6  -7   32.63    1.66
   1  -6   7   32.59    0.98
  -1  -6  -7   34.06    1.66
  -1   6   7   35.44    1.72
   2   6   7    9.21    1.08
   2   6   7    8.79    0.70
  -2   6  -7   10.01    1.08
  -2  -6   7    9.17    0.93
   2  -6  -7    8.92    1.14
   2   6  -7    9.53    0.88
  -2  -6  -7    9.78    1.08
   2  -6   7    8.18    1.07
  -2   6   7    8.57    1.03
[truncated: 667,032 more chars]
